# Supplementary material for: Technical note: RA138 calcite U–Pb LA-ICP-MS primary reference material
Source: Copernicus journal article supplement (doi:10.5194/gchron-6-465-2024), 2024-08-08
Supplement: Supplementary file 1 [file Supplementary Tables.xlsx]

## Sheet: S1 LA Metadata ETH
LA-ICP-MS U-(Th-)Pb Metadata
Laboratory and sample preparation
Laboratory name	Department of Earth Sciences, ETH Zürich
Sample type/mineral	Calcite
Sample preparation	Polished thick sections and chips mounted in epoxy, polishd blocks
Imaging	CL8200 Mk5-2 Optical Cathodoluminescence System
Laser ablation system
Make, model, and type	ASI (Resonetics) Resolution S155
Ablation cell and volume	Laurin Technic, 2 volume cell, effective volume ca. 1 cm3
Laser wavelength (nm)	193 nm
Pulse width (ns)	25 ns
Fluence (J cm-2)	~2 J cm-2
Repetition rate (Hz)	5.0 (for 110 mm spot diameter)
Ablation duration (s)	40 s
Ablation pit depth / ablation rate	0.12 mm/pulse
Spot diameter (mm)	110 mm
Sampling mode / pattern	Static spot ablation
Carrier gas	100% He in the cell, Ar make-up gas combined in cell above, ablation in funnel
Cell carrier gas flow (l min-1)	0.5 l min-1
ICP-MS instrument
Make, model and type	Thermo Element XR, sector-field single collector ICP-MS with high capacity interface pump
Sample introduction	Ablated aerosol direct
RF power (W)	1350 - 1550 W (optimized daily)
Make-up gas flow	0.90 - 1.05 l min-1 Ar (optimized daily), 2 ml min-1 N2
Detection system	triple (pulse counting, analog, Faraday) cross-calibrated daily with 238U, fixed ACF value, all isotopes usually in pulse counting only (<5 Mcps)
Masses measured (amu)	202, 204, 206, 207, 208, 232, 235, 238
Integration time per peak/dwell times (ms)	11 ms (all masses) except 206, 207 (50 ms)
Total integration time per output data point (s)	0.174 s
Sensitvity / efficiency (%, element)	~ 0.5 % U
Dead time (ns)	15
Typical oxide rate (ThO/Th)	0.0018
Typical doubly charged rate (Ba++/Ba+)	0.035
Data processing
Gas blank	20 s
Calibration strategy	NIST614 glass standard as primary RM for drift and 207Pb/206Pb ratios (see Roberts et al. 2017); WC-1 carbonate RM for matrix matching of 206Pb/238U (anchored to initial Pb composition of 0.85, see Roberts et al. 2017), RA138 (This work)
Reference material (RM) info	NIST614 (concentration data Jochum et al. 2011, Pb isotopes Baker et al. 2004); WC-1 (Roberts et al. 2017)
Data processing package used	Iolite 4, VisualAge for integration, interval selection, and gas blank correction, and the UcomPbin (Chew et al., 2014). In-house spreadsheet data processing for drift and matrix corrections. IsoplotR (Vermeesch 2018) for isochrons, intercept ages, and initial Pb compositions
Correction for LIEF	LIEF correction 238U/206Pb to homogenous parts of WC-1. RA138 has similar LIFE as WC-1.
Mass discrimination	Normalized to reference material (sample-standard bracketing)
Common-Pb correction, composition and uncertainty	Not applied. Ages calculated by linear regressions in Tera-Wasserburg concordia plots.
Uncertainty level and propagation	Lower intercept ages are quoted at 2S absolute, propagation is by quadratic addition. Counting statistics uncertainties are propagated to the 207Pb/206Pb ratios, together with the uncertainty of the primary RM value and the uncertainty of repeated measurements. The uncertainty value for lower intercept isochron ages includes uncertainties from the primary RM and systematic uncertainties, estimate…
Quality control / Validation	not available as this work describes directly a RM and ist validation
	Systematic uncertainty for propagation is 1.5 % (2s)
This reporting is based on a template available for download on www.Plasmage.org

## Sheet: S2a Data
Raw Data (Iolite output, DRS: VizualAge UcomPbine; Exponential; No ComPb corr;7/6 - NIST614; U238 only)																Final Data (NIST 614, and WC-1 corrected)					outlier
Identifier	comment	Start time	Duration (s)	Spot Size (µm)	Pb206_CPS_mean	Pb206_CPS_2SE(int)	Pb207_CPS_mean	Pb207_CPS_2SE(int)	U238_CPS_mean	U238_CPS_2SE(int)	DC Pb206/U238_mean	DC Pb206/U238_2SE(int)	Pb207/Pb206_mean	Pb207/Pb206_2SE(int)		corr 238/206	1SE prop	ROM 207/206 corr	1SE	err corr
RA138
RA138 - 1		2022-11-25 14:54:11	37.516	110	54403.7	502.069	20534.3	434.896	679732	8080.35	0.0809733	0.0012459	0.377511	0.0053936		11.8595	0.220976	0.377944	0.0026968	0.930523
RA138 - 2		2022-11-25 14:55:36	37.504	110	52531.1	569.027	7920.44	186.582	940560	10361.8	0.0568551	0.000441963	0.151391	0.00276457		16.8903	0.294058	0.150976	0.00138229	0.740275
RA138 - 3		2022-11-25 15:41:15	37.499	110	52322.8	390.35	9162.77	119.436	900847	9359.8	0.0583981	0.000452628	0.176246	0.00233035		16.444	0.286246	0.175352	0.00116518	0.72979
RA138 - 4		2022-11-25 15:42:39	37.49	110	52221.4	384.94	9217.46	98.6044	905532	9161.59	0.0585002	0.000360474	0.176897	0.00162077		16.4153	0.283129	0.176741	0.000810385	0.477363
RA138 - 5		2022-11-25 16:23:39	37.478	110	46696	321.343	6732.39	114.762	849188	8530.35	0.0555286	0.000465443	0.143137	0.00215458		17.2938	0.302301	0.144366	0.00107729	0.681873
RA138 - 6		2022-11-25 16:25:04	37.486	110	44896.8	342.504	12799.1	233.739	657076	6632.29	0.0690958	0.000687631	0.286287	0.00389765		13.8981	0.245786	0.285456	0.00194883	0.790118
RA138 - 7		2022-11-25 17:09:02	37.482	110	72863	852.124	21048.1	520.074	1.04636e+06	11258.9	0.0702783	0.00068052	0.288665	0.00456052		13.6642	0.241141	0.289255	0.00228026	0.882542
RA138 - 8		2022-11-25 17:10:26	37.459	110	57399.5	673.561	11921	288.615	946663	11556.6	0.0607356	0.000403128	0.207264	0.00324305		15.8111	0.273405	0.20796	0.00162153	0.461573
RA138 - 9		2022-11-25 17:51:16	37.49	110	56881.2	480.079	8799.53	127.316	1.00938e+06	11812.7	0.0566708	0.000422314	0.155977	0.00207238		16.9452	0.294418	0.154905	0.00103619	0.494157
RA138 - 10		2022-11-26 08:53:06	37.482	110	55950.4	406.024	23075.1	305.241	626324	6368.27	0.0922479	0.0010945	0.415628	0.00448987		10.41	0.187145	0.412968	0.00224494	0.87677
RA138 - 11		2022-11-26 09:46:14	37.485	110	52729	561.338	11577.6	222.745	871533	10630.7	0.061945	0.000513763	0.221067	0.00299044		15.5024	0.270824	0.219858	0.00149522	0.712169
RA138 - 12		2022-11-26 09:47:38	37.484	110	51776.3	558.825	8981.83	129.149	931109	13355.6	0.0575097	0.000402151	0.173579	0.00207819		16.698	0.289325	0.173704	0.0010391	0.642283
RA138 - 13		2022-11-26 10:28:55	37.494	110	53059.3	440.874	10254.7	187.405	932441	9193.76	0.0596562	0.00049405	0.194323	0.00285057		16.0972	0.281192	0.193524	0.00142529	0.690506
RA138 - 14		2022-11-26 10:30:20	37.458	110	49028.9	402.414	6835.9	84.3709	934475	11095.8	0.054373	0.000356929	0.139422	0.00142568		17.6613	0.305275	0.139611	0.000712841	0.436963
RA138 - 15		2022-11-26 11:15:57	37.485	110	50057.2	390.129	9242.63	123.151	896835	9526.36	0.0585641	0.000393698	0.184652	0.00184384		16.3974	0.283677	0.184886	0.00092192	0.636269
RA138 - 16		2022-11-26 11:58:30	37.441	110	48980.6	417.979	8175.98	179.552	888134	8338.19	0.0584594	0.000412266	0.167131	0.00289449		16.4268	0.284724	0.167144	0.00144725	0.570126
RA138 - 17		2022-11-26 12:58:12	37.449	110	53838.9	600.95	13239.4	347.226	887473	11672.6	0.0656042	0.000715592	0.244309	0.00402494		14.6378	0.260923	0.246234	0.00201247	0.931961
RA138 - 18		2022-11-26 12:59:36	37.465	110	43696.8	468.898	7860.45	220.947	794306	10751.3	0.0585987	0.000570753	0.180051	0.0043795		16.3877	0.289332	0.180125	0.00218975	0.848538
RA138 - 19		2022-11-26 15:58:29	37.447	110	41363.7	396.61	6427.05	88.1216	827659	11636.8	0.0550063	0.000390029	0.154959	0.00192047		17.458	0.302666	0.155585	0.000960236	0.493925
RA138 - 20		2022-11-26 16:42:37	37.486	110	49052.5	447.533	10917.5	203.988	859921	10338.8	0.0637053	0.00054565	0.225345	0.00360553		15.0741	0.263834	0.222863	0.00180277	0.73108
RA138 - 21		2022-11-26 17:28:48	37.45	110	48423.4	406.645	11471.5	304.148	836237	8615.82	0.0636654	0.000731055	0.238342	0.00519877		15.0835	0.270227	0.237214	0.00259938	0.895753
RA138 - 22		2022-11-26 17:30:13	37.499	110	46961.5	373.94	9477.57	148.075	867155	8558.37	0.059737	0.000340303	0.200095	0.00238603		16.0754	0.276624	0.202083	0.00119302	0.361537
RA138 - 23		2022-11-26 18:11:33	37.485	110	43729	421.251	7389.39	236.655	848641	6619.01	0.0567779	0.000439938	0.167824	0.00394875		16.9132	0.29441	0.169206	0.00197437	0.808256
RA138 - 24		2022-11-26 18:12:57	37.458	110	43127.4	285.042	5120.08	56.4068	896549	8941.16	0.0532712	0.000361448	0.118392	0.00146061		18.0266	0.311973	0.118877	0.000730304	0.508361
RA138 - 25		2022-11-26 18:55:42	37.49	110	44525.3	414.107	8459.41	308.268	834839	5308.54	0.0589533	0.000707145	0.189147	0.00516532		16.2892	0.29319	0.190243	0.00258266	0.888343
RA138 - 26		2022-11-26 19:40:10	37.477	110	39594.1	240.133	5248.72	79.3192	813821	8023.89	0.0538077	0.000411861	0.132991	0.00203334		17.8469	0.310476	0.132739	0.00101667	0.607468
RA138 - 27		2022-11-26 19:41:36	37.497	110	42428.3	312.424	7369.41	133.098	816084	6671.2	0.057158	0.000344587	0.175058	0.00250442		16.8008	0.28958	0.173921	0.00125221	0.360913
RA138 - 28		2022-11-26 20:23:24	37.499	110	50140	712.336	9718.06	257.989	922546	15475	0.0603582	0.000443549	0.193493	0.0033418		15.91	0.276256	0.194075	0.0016709	0.697902
RA138 - 29		2022-11-26 20:24:48	37.498	110	49190.6	431.817	12558	232.3	826807	10495.2	0.0659906	0.000673129	0.256892	0.00385808		14.5521	0.257867	0.25563	0.00192904	0.85734
RA138 - 30		2022-11-26 21:03:29	37.481	110	33405.6	423.129	12012.4	297.124	465085	2160.87	0.0785915	0.00104795	0.358034	0.00535116		12.2189	0.222788	0.360069	0.00267558	0.858464
RA138 - 31		2022-11-26 21:04:53	37.458	110	46581.6	604.205	11846.5	318.617	789999	9482.11	0.0665883	0.00052497	0.253133	0.00401857		14.4214	0.251254	0.254655	0.00200929	0.835813
C_WC1
WC-1 - 1		2022-11-25 14:51:14	37.48	110	39548.5	344.188	4236.5	65.5359	967315	12424.4	0.041561	0.000349188	0.107743	0.00153193		23.1058	0.403951	0.107264	0.000765963	0.0631083
WC-1 - 2		2022-11-25 14:52:38	37.484	110	36605.8	273.702	3979.92	50.7091	892278	8396.91	0.0417203	0.000349134	0.109021	0.00142831		23.0176	0.402317	0.108868	0.000714154	0.442116
WC-1 - 3		2022-11-25 15:38:18	37.445	110	41838.5	326.844	4787.93	66.0638	1.01213e+06	10928.4	0.041871	0.000312659	0.114879	0.00164641		22.9347	0.398521	0.11459	0.000823205	0.554559
WC-1 - 4		2022-11-25 15:39:49	25.628	110	37343.1	305.708	2893.67	71.2809	927671	9613.62	0.040887	0.00034235	0.0785891	0.00184539		23.4867	0.410529	0.0775916	0.000922693	0.478992
WC-1 - 5		2022-11-25 16:20:43	37.502	110	35024.6	286.935	3497.8	63.4737	855343	8941.85	0.0412267	0.00028567	0.100688	0.00174043		23.2932	0.40345	0.0999992	0.000870214	0.267206
WC-1 - 6		2022-11-25 16:22:06	37.51	110	35160.3	404.784	3606.38	59.4821	850717	13288.4	0.0420119	0.000326142	0.10264	0.00175504		22.8578	0.397925	0.102706	0.000877519	0.0839514
WC-1 - 7		2022-11-25 17:06:05	37.482	110	34846.3	376.352	3676.91	99.8343	842569	10477.2	0.041717	0.000295046	0.106475	0.00210758		23.0194	0.399041	0.105658	0.00105379	0.392323
WC-1 - 8		2022-11-25 17:07:29	37.501	110	36988.1	365.713	4217.82	54.9833	900268	12021.2	0.0412859	0.000249347	0.114242	0.00140524		23.2597	0.400929	0.114183	0.000702622	0.449645
WC-1 - 9		2022-11-25 17:48:20	37.49	110	35510.6	251.834	3856.39	66.5893	832224	6317.75	0.0427949	0.000292325	0.10836	0.0016724		22.4396	0.388446	0.108742	0.000836202	0.258862
WC-1 - 10		2022-11-25 17:49:44	37.465	110	31382	283.237	3556.61	48.2954	753604	9676.14	0.041909	0.000339059	0.113957	0.00172401		22.9139	0.399754	0.113483	0.000862005	0.450182
WC-1 - 11		2022-11-26 08:03:24	10.829	110	35142.3	394.043	3661.66	113.797	878218	7156.23	0.04289	0.000454625	0.106422	0.00271632		22.3898	0.398064	0.104333	0.00135816	-0.0631083
WC-1 - 12		2022-11-26 08:04:47	37.466	110	59398.3	1304.75	3919.89	135.46	1.56626e+06	35448.4	0.0405359	0.000280786	0.067284	0.00177577		23.6901	0.410319	0.0660807	0.000887885	0.706999
WC-1 - 13		2022-11-26 08:50:07	37.505	110	44716.3	361.453	4899.25	76.016	1.1173e+06	11550.4	0.0415839	0.000276985	0.110455	0.0013594		23.0931	0.399376	0.109708	0.000679698	0.463027
WC-1 - 14		2022-11-26 08:51:32	37.518	110	39163.6	231.229	4338.01	56.6047	988638	3906.89	0.0409888	0.000279929	0.111714	0.00140532		23.4283	0.405559	0.110913	0.000702662	0.256213
WC-1 - 15		2022-11-26 09:43:17	37.481	110	33243.9	210.491	3093.18	58.6896	844039	5644.97	0.0404605	0.000283517	0.0937057	0.00159015		23.7343	0.411276	0.0931683	0.000795073	0.295495
WC-1 - 16		2022-11-26 09:44:40	37.513	110	40312.3	318.092	3592.13	77.3339	1.0188e+06	10271.9	0.0408476	0.000250135	0.0885641	0.00161721		23.5093	0.405405	0.0892256	0.000808603	0.244777
WC-1 - 17		2022-11-26 10:25:57	37.454	110	11797.8	170.338	992.211	29.0099	295815	5476.23	0.0414703	0.000461757	0.0847755	0.00226408		23.1563	0.41358	0.0842129	0.00113204	0.24157
WC-1 - 18		2022-11-26 10:27:22	37.492	110	37013.1	235.819	4004.22	60.3378	937364	6555.08	0.0408809	0.000281366	0.107857	0.00161027		23.4902	0.406753	0.108327	0.000805135	0.0529144
WC-1 - 19		2022-11-26 11:11:35	37.481	110	40383.6	236.446	4202.73	52.9721	1.04703e+06	10789.9	0.0402978	0.000291585	0.104527	0.00138092		23.8301	0.413495	0.104208	0.000690461	0.419919
WC-1 - 20		2022-11-26 11:12:59	37.478	110	32773.4	219.291	3560.23	64.253	827287	7961.63	0.0411661	0.000331823	0.108797	0.00197052		23.3274	0.406889	0.108776	0.000985262	-0.0270015
WC-1 - 21		2022-11-26 11:54:10	37.473	110	28547.1	173.215	2447.92	34.5156	747760	6206.76	0.0403109	0.000290272	0.0859194	0.00136413		23.8223	0.413274	0.0858638	0.000658137	0.315871
WC-1 - 22		2022-11-26 11:55:34	37.458	110	30929.2	255.406	3573.38	54.9082	772648	9887.37	0.0425129	0.00035994	0.116096	0.0017381		22.5884	0.395083	0.115687	0.000869052	0.397726
WC-1 - 23		2022-11-26 12:55:15	37.455	110	33853.5	289.103	3679.97	120.544	866667	6318.23	0.041616	0.000275971	0.108159	0.00273833		23.0752	0.399002	0.108847	0.00136916	0.5377
WC-1 - 24		2022-11-26 12:56:44	31.372	110	42185.1	282.44	3095.25	125.234	1.10368e+06	8171.92	0.0406508	0.000306425	0.0724005	0.002462		23.6231	0.410664	0.0734703	0.001231	0.72502
WC-1 - 25		2022-11-26 15:55:32	37.49	110	25044.7	298.484	2626.4	54.3922	658068	10693.8	0.04201	0.000361606	0.105407	0.00170175		22.8588	0.400205	0.105008	0.000850877	0.341064
WC-1 - 26		2022-11-26 15:56:55	37.466	110	33151.3	294.248	2081.25	47.7442	939563	11356.7	0.0388279	0.000271488	0.0631967	0.00141704		24.7322	0.428531	0.0628635	0.000708519	0.151452
WC-1 - 27		2022-11-26 16:38:15	37.448	110	27170.5	224.789	2991.96	53.323	731649	7189.39	0.0413042	0.000276323	0.110224	0.00168327		23.2494	0.402145	0.110264	0.000841636	0.247084
WC-1 - 28		2022-11-26 16:39:39	37.442	110	30962.4	259.416	3118.13	60.3738	816705	10086.5	0.0420396	0.000313814	0.101064	0.0019225		22.8427	0.396916	0.10084	0.00096125	0.232758
WC-1 - 29		2022-11-26 17:25:51	37.429	110	28228.4	189.372	3553.16	55.2575	726799	5982.86	0.0425264	0.000319238	0.126867	0.00199687		22.5812	0.392475	0.126038	0.000998436	0.336003
WC-1 - 30		2022-11-26 17:27:15	37.522	110	22404.2	252.97	2450.73	138.289	599217	4916.81	0.0412582	0.000456617	0.105571	0.00364346		23.2753	0.415462	0.109532	0.00182173	0.923022
WC-1 - 31		2022-11-26 18:08:37	37.433	110	27659.4	380.74	2801.69	49.7183	747596	13192.8	0.0409444	0.000307661	0.101191	0.00166144		23.4537	0.407659	0.101427	0.000830722	0.230074
WC-1 - 32		2022-11-26 18:10:00	37.466	110	35121.1	273.059	3503.12	49.2213	961696	10390	0.0403117	0.00028392	0.0998881	0.00128398		23.8218	0.41288	0.0998762	0.000641989	0.296122
WC-1 - 33		2022-11-26 18:51:20	37.467	110	33618.4	266.425	3769.2	56.495	899052	10025.9	0.0414073	0.00030104	0.112444	0.0017769		23.1916	0.402499	0.112266	0.000888448	0.152324
WC-1 - 34		2022-11-26 18:52:44	37.47	110	24526.2	255.383	2677.09	48.758	663059	9268.05	0.0411398	0.000307705	0.109542	0.00184872		23.3423	0.405634	0.109297	0.000924358	0.222555
WC-1 - 35		2022-11-26 19:37:12	37.46	110	32566.9	254.072	3994.2	66.5809	837751	8916.68	0.0431852	0.000328099	0.123108	0.00167464		22.2368	0.386707	0.122808	0.00083732	0.217998
WC-1 - 36		2022-11-26 19:38:36	37.49	110	28907.8	232.81	2787.14	47.6325	766990	8430.46	0.0412884	0.000274767	0.0969146	0.00163593		23.2583	0.40222	0.0965427	0.000817966	0.288732
WC-1 - 37		2022-11-26 20:20:28	37.52	110	36184.4	562.105	3593.68	70.4806	983925	16477.8	0.0408433	0.000228125	0.0996284	0.0013387		23.5118	0.404373	0.0994474	0.000669349	0.209394
WC-1 - 38		2022-11-26 20:21:51	37.484	110	31582.8	207.047	3524.79	61.3665	823239	6892.43	0.0427445	0.000283361	0.111542	0.0017843		22.466	0.388463	0.111753	0.000892151	0.194303
WC-1 - 39		2022-11-26 21:00:33	37.467	110	32916.2	242.737	3627.95	56.7319	877370	8364.74	0.0418793	0.000291333	0.11057	0.00159403		22.9302	0.397225	0.110364	0.000797016	0.266042
WC-1 - 40		2022-11-26 21:01:57	37.546	110	30476.9	359.682	3221.61	72.1553	841295	12074.1	0.0404874	0.000269422	0.105782	0.00216426		23.7185	0.410177	0.105847	0.00108213	0.0391945
C_RA138
RA138 - 1		2022-11-27 11:05:37	37.498	110	53202.1	330.398	9533.17	130.417	959462	7646.27	0.0598961	0.000310386	0.180378	0.00208272		16.0832	0.270149	0.180378	0.00104148	-0.173643
RA138 - 2		2022-11-27 11:07:00	37.465	110	58390.2	667.315	13163.6	260.656	988573	12641.8	0.0640016	0.000405662	0.223874	0.00270971		15.0532	0.254336	0.223874	0.001355	-0.349222
RA138 - 3		2022-11-27 11:50:13	37.441	110	49936.5	409.217	6535.97	121.731	988794	10293.3	0.0550468	0.00028936	0.132192	0.00183743		17.5558	0.294987	0.132192	0.000918604	-0.144139
RA138 - 4		2022-11-27 11:51:36	37.489	110	53439.1	350.217	10069.9	138.465	970227	9544.26	0.0595417	0.000415633	0.188467	0.00235818		16.2318	0.275276	0.188467	0.00117897	-0.101059
RA138 - 5		2022-11-27 12:34:37	37.46	110	51535.4	318.733	7825.1	102.974	975087	7361.78	0.0570336	0.000316119	0.153089	0.0017143		16.9833	0.285757	0.153089	0.000857092	0.00781557
RA138 - 6		2022-11-27 12:36:01	37.49	110	47765.4	524.903	9725.48	201.521	839755	8328.57	0.0614392	0.000415397	0.203552	0.00249019		15.7664	0.267033	0.203552	0.001245	-0.0942584
RA138 - 7		2022-11-27 13:20:25	37.49	110	57854.6	693.297	15533.3	278.989	931569	13405.9	0.0675483	0.000487066	0.269401	0.00388705		14.3618	0.243908	0.269401	0.00194343	-0.532952
RA138 - 8		2022-11-27 13:21:48	27.085	110	62315.1	428.364	22018.2	262.544	879549	9194.76	0.0782332	0.000528895	0.353964	0.00296366		12.4007	0.210028	0.353964	0.00148177	-0.0777705
RA138 - 9		2022-11-27 14:04:32	37.492	110	51564.5	545.831	18240.3	374.949	689658	5218.45	0.0803111	0.000846107	0.357469	0.00474688		12.0885	0.210484	0.357469	0.00237391	-0.651095
RA138 - 10		2022-11-27 14:05:55	37.481	110	59375	465.163	12000.8	177.987	1.04418e+06	9663.88	0.0613333	0.0003253	0.203681	0.00242173		15.8292	0.266033	0.203681	0.0012111	-0.193887
RA138 - 11		2022-11-27 14:50:01	37.487	110	64433.1	532.467	14960.3	256.177	1.07945e+06	8682.95	0.0646368	0.000420886	0.237356	0.00327557		15.0211	0.254042	0.237356	0.00163796	-0.44956
RA138 - 12		2022-11-27 14:51:38	25.882	110	48267.5	853.301	15930.5	550.264	686213	14840.6	0.0747614	0.00176609	0.331157	0.00753894		12.9868	0.264541	0.331157	0.00376985	-0.573703
RA138 - 13		2022-11-27 15:34:03	37.516	110	51970.7	878.256	20477.8	685.032	641374	5662.27	0.0869081	0.00151949	0.393824	0.00706726		11.1658	0.209443	0.393824	0.00353335	-0.793434
RA138 - 14		2022-11-27 15:35:26	37.498	110	49911.2	296.197	9754.86	92.6208	890383	7415.76	0.0607361	0.000285392	0.196772	0.00191434		15.9768	0.267795	0.196772	0.000957092	0.219495
RA138 - 15		2022-11-27 16:19:39	37.516	110	65479.6	985.974	26683.3	580.109	785096	14600.4	0.0885176	0.00129098	0.411599	0.00689805		10.9503	0.198501	0.411599	0.00344876	-0.773406
RA138 - 16		2022-11-27 16:21:02	37.45	110	55571	479.104	8528.65	93.8439	1.05195e+06	12244.2	0.0572427	0.000261997	0.154089	0.00154969		16.9324	0.283668	0.154089	0.000774783	0.24008
RA138 - 17		2022-11-27 17:04:04	37.498	110	53129.8	553.635	11138	456.797	936228	8333.21	0.0610213	0.000808796	0.209916	0.00673756		15.859	0.283404	0.209916	0.0033687	-0.860684
RA138 - 18		2022-11-27 17:05:27	37.433	110	57096.9	576.353	10966.2	340.663	1.04291e+06	9353.03	0.0598278	0.0005267	0.190861	0.00466264		16.1744	0.277712	0.190861	0.00233127	-0.824173
RA138 - 19		2022-11-27 17:50:35	18.062	110	62527.5	5540.88	51547.6	4632.83	21102.7	626.171	3.15063	0.301205	0.820384	0.00737046		0.306494	0.0155085	0.820384	0.00368522	-0.237837	x
RA138 - 20		2022-11-27 17:51:48	37.5	110	42921.8	462.541	11844.2	280.367	658660	6138.16	0.0691663	0.000898105	0.27878	0.00497191		13.9604	0.248784	0.27878	0.00248597	-0.461394
RA138 - 21		2022-11-27 18:34:54	13.144	110	121952	5367.5	99574.6	4706.02	117911	4153.63	1.14949	0.0620757	0.818745	0.0058248		0.838011	0.0265598	0.818745	0.0029129	-0.373959
RA138 - 22		2022-11-27 18:35:10	14.067	110	45536.9	1804.6	34168	1478.21	125472	3147.46	0.38089	0.0137376	0.750673	0.00859037		2.529	0.0619804	0.750673	0.00429592	-0.222968
RA138 - 23		2022-11-27 18:36:16	37.474	110	58328.9	336.689	5023.69	66.6033	1.22509e+06	9146.23	0.0514421	0.000213717	0.0867912	0.00102245		18.7242	0.31317	0.0867912	0.000511311	0.116482
RA138 - 24		2022-11-27 19:19:19	37.482	110	60054.7	493.189	5309.92	102.741	1.25937e+06	12954.4	0.0518502	0.000264371	0.0877317	0.00135304		18.5267	0.311075	0.0877317	0.000676513	-0.0722548
RA138 - 25		2022-11-27 19:20:42	37.477	110	44761	238.079	7459	105.167	846043	6853.74	0.0572828	0.000290183	0.166975	0.00227656		16.7681	0.281506	0.166975	0.00113825	-0.0661337
RA138 - 26		2022-11-27 20:02:07	28.044	110	48810	305.184	7181.65	96.651	960687	8179.28	0.0556819	0.000297964	0.147331	0.00180392		17.2012	0.289157	0.147331	0.000901955	0.17921
RA138 - 27		2022-11-27 20:03:32	37.487	110	47045.2	371.243	8048.75	170.295	874163	7355.14	0.0579852	0.000343905	0.170809	0.00282585		16.5163	0.278446	0.170809	0.00141292	-0.283931
RA138 - 28		2022-11-27 20:46:35	37.324	110	48673.6	284.86	7079.22	83.7059	951644	8306.24	0.0552548	0.000266387	0.145535	0.00168717		17.2778	0.28975	0.145535	0.000843522	0.0389345
RA138 - 29		2022-11-27 20:48:17	18.978	110	46334	386.902	7568.87	168.826	866202	6979.95	0.0567793	0.00044246	0.163489	0.00267334		16.8117	0.286593	0.163489	0.00133657	-0.0953995
RA138 - 30		2022-11-27 21:29:27	31.534	110	61040.3	412.216	17848.1	261.675	953539	9260.17	0.0698813	0.00043168	0.291971	0.00333967		13.6165	0.22986	0.291971	0.00166945	-0.127378
RA138 - 31		2022-11-27 21:30:49	37.497	110	114014	4280.97	74050	2963.29	669957	25271	0.184353	0.00661908	0.6681	0.00728342		5.16097	0.126176	0.6681	0.00364089	-0.886126	x
RA138 - 32		2022-11-27 22:12:19	7.988	110	794642	23482.6	673162	20840.2	145331	8833.23	6.40855	0.425597	0.846258	0.00429139		0.147978	0.00549319	0.846258	0.0021461	-0.545766
RA138 - 33		2022-11-27 22:12:32	26.612	110	54445.6	2273.2	37283.4	1928.74	239022	8558	0.240868	0.0140707	0.686308	0.010147		3.93704	0.132261	0.686308	0.0050745	-0.762094
RA138 - 34		2022-11-27 22:13:44	17.072	110	46521.2	395.64	7328.98	184.069	910837	6786.27	0.0566566	0.0004802	0.16014	0.00310768		16.7362	0.286666	0.16014	0.00155418	-0.344996
RA138 - 35		2022-11-27 22:14:02	20.743	110	46680.6	542.084	8770.78	369.786	836155	5869.35	0.0593591	0.000742736	0.188752	0.00644162		15.9738	0.283313	0.188752	0.00322151	-0.706793
RA138 - 36		2022-11-28 07:40:11	39.43	110	40263	411.585	5605.5	112.487	819065	10971.3	0.0532475	0.000313193	0.140103	0.00264115		17.3283	0.29206	0.140103	0.00131973	-0.245776
RA138 - 37		2022-11-28 07:41:37	37.48	110	44395	416.104	10838.6	208.59	777586	8269.8	0.0621514	0.000452518	0.242015	0.00333287		14.8463	0.252247	0.242015	0.00166543	-0.259387
RA138 - 38		2022-11-28 08:24:10	37.498	110	50136.3	401.822	12246.7	262.526	842522	7037.63	0.0645436	0.000517996	0.2424	0.00383049		14.3147	0.244413	0.2424	0.00191625	-0.526109
RA138 - 39		2022-11-28 08:25:33	37.508	110	40120	200.845	6169.64	81.9289	774151	4771.78	0.0561542	0.000349225	0.154298	0.00217664		16.4542	0.277826	0.154298	0.00108891	0.0650814
RA138 - 40		2022-11-28 09:08:21	37.488	110	43537	314.694	6725.84	90.4281	856626	8453.4	0.0556346	0.000318851	0.154115	0.00175496		16.6427	0.280288	0.154115	0.000877905	0.187167
RA138 - 41		2022-11-28 09:09:45	37.475	110	43540.2	369.786	5305.63	81.8665	887475	10446.8	0.0533403	0.000307331	0.123456	0.00180705		17.3599	0.292414	0.123456	0.000903943	-0.0480375
RA138 - 42		2022-11-28 09:50:51	38.466	110	44465.5	394.172	5099.82	73.2298	923918	9948.46	0.0521875	0.000254537	0.114936	0.00133723		17.793	0.298463	0.114936	0.000668425	0.139307
RA138 - 43		2022-11-28 09:52:16	20.189	110	44133.9	378.508	8483.46	169.852	824358	6654.89	0.0590315	0.000507317	0.192496	0.0035376		15.7318	0.269694	0.192496	0.00176824	-0.189606
C_WC1
WC-1 - 1		2022-11-27 11:08:33	37.477	110	51568.8	1068.38	6876.25	259.743	1.26115e+06	16383.4	0.0444255	0.000623608	0.133621	0.00299558		21.7994	0.181821	0.133621	0.00149792	-0.41137
WC-1 - 2		2022-11-27 11:09:55	35.415	110	47579.3	326.841	6616.24	111.798	1.19111e+06	8501.14	0.0434569	0.000240035	0.138576	0.00200735		22.2877	0.118678	0.138576	0.00100375	-0.10202
WC-1 - 3		2022-11-27 11:53:09	37.458	110	42859.4	366.206	5259.94	76.5112	1.09827e+06	12023.2	0.0423182	0.000195954	0.123443	0.00156033		22.9565	0.117302	0.123443	0.000780087	0.0918961
WC-1 - 4		2022-11-27 11:54:39	30.642	110	40713.2	1228.89	4713.45	431.201	1.01037e+06	9045.89	0.0431226	0.00122775	0.113063	0.00903357		22.5303	0.335247	0.113063	0.0045164	-0.0102403
WC-1 - 5		2022-11-27 12:37:48	23.274	110	36881.4	834.048	3218.5	208.439	932935	8897.52	0.0421771	0.000890294	0.0883819	0.00610125		23.0855	0.264296	0.0883819	0.00299312	0.0247571
WC-1 - 6		2022-11-27 12:38:56	37.474	110	33916	746.644	3331.03	168.696	876791	18572.2	0.0428048	0.00137651	0.0982065	0.00536412		22.748	0.378413	0.0982065	0.0026818	0.0573627
WC-1 - 7		2022-11-27 13:23:43	17.643	110	42200.6	2107.97	5504.95	334.452	1.00871e+06	14071.3	0.0457651	0.00191533	0.130856	0.00691049		21.3073	0.454132	0.130856	0.00345522	0.0876885
WC-1 - 8		2022-11-27 13:24:43	37.491	110	43684.3	358.645	5491.77	74.0843	1.10319e+06	12239	0.0427686	0.000242504	0.126084	0.00150601		22.8007	0.122275	0.126084	0.000753014	0.235877
WC-1 - 9		2022-11-27 14:07:27	37.468	110	41422.5	360.719	4741.67	63.0194	1.07274e+06	10920.3	0.0418153	0.000206096	0.114605	0.00150209		23.3361	0.120842	0.114605	0.000751187	0.185148
WC-1 - 10		2022-11-27 14:08:51	37.109	110	33578.3	570.139	4050.1	134.523	825129	7618.83	0.0433655	0.000559293	0.119787	0.00402679		22.5022	0.177136	0.119787	0.00201377	0.00499979
WC-1 - 11		2022-11-27 14:53:01	37.476	110	41779.7	373.447	4958.95	110.771	1.07145e+06	13015.8	0.0424165	0.000231149	0.118529	0.00267765		23.0061	0.122068	0.118529	0.00133896	0.116812
WC-1 - 12		2022-11-27 14:54:23	37.516	110	40807.6	393.504	4646.81	66.3917	1.04932e+06	12988.6	0.0422256	0.000257754	0.114469	0.00143815		23.1099	0.12663	0.114469	0.000719142	0.396377
WC-1 - 13		2022-11-27 15:37:00	37.453	110	41373.9	194.234	4442.34	75.4982	1.08687e+06	5828.36	0.0411896	0.000197611	0.108119	0.00168387		23.6777	0.121887	0.108119	0.000841861	-0.0148493	x
WC-1 - 14		2022-11-27 15:38:22	37.453	110	42419.7	328.055	5071.44	71.2538	1.09861e+06	11602.6	0.0417928	0.000198069	0.119788	0.00147681		23.3354	0.119812	0.119788	0.000738336	0.224211
WC-1 - 15		2022-11-27 16:22:36	37.486	110	39883.1	400.663	4460.56	122.337	1.03022e+06	12836.3	0.0419987	0.000244736	0.112671	0.00301367		23.1945	0.12535	0.112671	0.00150672	0.0474633
WC-1 - 16		2022-11-27 16:24:04	32.849	110	30945.6	495.698	3891.98	195.323	761488	11368.1	0.0435888	0.000431487	0.125281	0.00567639		22.3473	0.149999	0.125281	0.00283799	0.0921012
WC-1 - 17		2022-11-27 17:07:01	37.511	110	40023.4	489.455	4663.09	122.1	1.03941e+06	16640.7	0.0420127	0.000244756	0.115798	0.00256554		23.1487	0.125094	0.115798	0.00128274	0.0300804
WC-1 - 18		2022-11-27 17:08:23	37.465	110	42657.2	290.156	4955.82	78.4908	1.1044e+06	10244.3	0.0420058	0.000210455	0.116528	0.00181966		23.1511	0.120331	0.116528	0.000909808	0.0774441
WC-1 - 19		2022-11-27 17:53:22	37.48	110	42890.1	261.152	4913.44	63.8585	1.14637e+06	11642.5	0.0405611	0.000227365	0.114707	0.00155405		23.9249	0.127902	0.114707	0.000777034	0.135693	x
WC-1 - 20		2022-11-27 17:54:54	28.151	110	38747.5	328.143	4725.45	267.203	980701	8700.53	0.0423144	0.000294664	0.120649	0.00637093		22.9318	0.131341	0.120649	0.00318552	-0.0410377
WC-1 - 21		2022-11-27 18:37:50	37.451	110	27284	213.491	3416.22	67.7374	698734	6519.99	0.0424052	0.000267877	0.125777	0.00223982		22.8278	0.12644	0.125777	0.0011201	-0.107699
WC-1 - 22		2022-11-27 18:39:12	37.474	110	44401.1	241.58	5416.29	68.2919	1.13247e+06	7149.75	0.0425828	0.000218665	0.121907	0.00146794		22.7308	0.118829	0.121907	0.000734097	0.00774037
WC-1 - 23		2022-11-27 19:22:15	37.494	110	42035	305.679	4542.6	61.2653	1.09404e+06	8778.41	0.0416343	0.000203118	0.108334	0.00143866		23.1855	0.119789	0.108334	0.00071931	0.0992187
WC-1 - 24		2022-11-27 19:23:53	23.353	110	39162.2	373.125	6159.19	597.929	979185	6638.24	0.0425343	0.000370274	0.154956	0.0143063		22.6925	0.142724	0.154956	0.00715294	0.103074	x
WC-1 - 25		2022-11-27 20:05:06	37.474	110	44503.9	363.746	5525.09	95.9337	1.13306e+06	9473.59	0.0426112	0.000247157	0.12395	0.00194424		22.5871	0.121906	0.12395	0.00097212	0.112989
WC-1 - 26		2022-11-27 20:06:28	37.482	110	43958.4	316.051	5648.45	79.5949	1.1163e+06	10387.8	0.0428346	0.000213647	0.129359	0.00184317		22.4672	0.116656	0.129359	0.000921591	0.0472243
WC-1 - 27		2022-11-27 20:49:40	28.924	110	43249	357.662	5713.54	109.308	1.07831e+06	10976.9	0.0431229	0.000261049	0.131728	0.0021313		22.246	0.121587	0.131728	0.00106556	0.0336962
WC-1 - 28		2022-11-27 20:51:03	28.445	110	45448.8	275.05	5466.84	91.8635	1.16577e+06	8640.26	0.0418237	0.000265389	0.119967	0.00205535		22.9347	0.127215	0.119967	0.00102758	0.192674
WC-1 - 29		2022-11-27 21:32:23	20.719	110	53264.4	365.947	5926.41	91.7241	1.40471e+06	7288.76	0.0419808	0.000291504	0.112905	0.00177844		22.7762	0.130313	0.112905	0.000889018	0.163367
WC-1 - 30		2022-11-27 21:33:46	27.011	110	41461	291.628	5961.97	390.844	1.07386e+06	5911.23	0.0423806	0.000284164	0.143648	0.0096382		22.5588	0.127471	0.143648	0.00474044	-0.0280748	x
WC-1 - 31		2022-11-27 22:15:17	37.506	110	29673.6	273.568	3786.15	63.4455	766804	9743.92	0.0421965	0.000265681	0.128338	0.00243331		22.583	0.124951	0.128338	0.00121693	0.137464
WC-1 - 32		2022-11-27 22:16:40	37.49	110	37838.9	314.386	5042.66	163.539	961120	8711.48	0.0427083	0.000345456	0.13249	0.00396799		22.3098	0.135696	0.13249	0.00198447	-0.0646165
WC-1 - 33		2022-11-28 07:43:10	37.453	110	33134.7	238.883	3983.31	58.2788	872570	10104.3	0.041232	0.000282824	0.120442	0.00205117		22.4933	0.128127	0.120442	0.000980395	0.105728
WC-1 - 34		2022-11-28 07:44:33	37.474	110	30228	320.771	3540.87	53.0267	782380	12311.4	0.0420753	0.000275641	0.116742	0.0018108		22.0432	0.123568	0.116742	0.00090496	0.0617949
WC-1 - 35		2022-11-28 08:27:07	37.497	110	39174.3	213.386	4613.7	66.9527	1.00767e+06	6949.92	0.0420056	0.000208577	0.118197	0.00171951		22.1098	0.114683	0.118197	0.000860228	0.121977
WC-1 - 36		2022-11-28 08:28:29	37.506	110	39040.5	334.501	4851.13	67.0431	1.00812e+06	11888.7	0.0420216	0.000252703	0.124249	0.00164121		22.1026	0.120561	0.124249	0.000821071	0.230134
WC-1 - 37		2022-11-28 09:11:33	21.531	110	24349	519.17	2151.56	133.975	637732	11743.1	0.0410715	0.000596517	0.0873998	0.00470531		22.6628	0.193639	0.0873998	0.0023537	-0.00354149
WC-1 - 38		2022-11-28 09:12:40	37.53	110	31902.4	206.116	4046.88	66.0089	828720	6787.59	0.0418486	0.000232937	0.125942	0.00205873		22.2434	0.118686	0.125942	0.0010298	0.0853072
WC-1 - 39		2022-11-28 09:53:50	37.49	110	38388.9	270.398	4271.32	88.4589	1.03448e+06	9301.66	0.0404097	0.000249737	0.111081	0.00207892		23.1012	0.127067	0.111081	0.00103911	-0.0277945
WC-1 - 40		2022-11-28 09:55:13	37.516	110	30256.1	192.578	3367.6	49.2275	843087	8054.88	0.0390442	0.000243781	0.111539	0.00163282		23.9117	0.13195	0.111539	0.000816103	0.308593	x
C_RA138
RA138 - 1		2022-11-28 20:59:44	37.026	110	42300.7	338.314	7468.69	153.931	810871	9137.15	0.0535595	0.00038982	0.176871	0.00350464		16.5343	0.291972	0.176871	0.00175216	-0.235034
RA138 - 2		2022-11-28 21:01:08	36.957	110	39288.2	283.355	5776.57	93.0022	794593	7373.52	0.050857	0.000291377	0.147293	0.00215053		17.4124	0.304984	0.147293	0.00107517	-0.0653515
RA138 - 3		2022-11-28 21:02:32	37.002	110	42588.9	400.28	8753.15	258.771	792508	5897.64	0.0550423	0.000520714	0.20429	0.00458991		16.0879	0.288218	0.20429	0.00229478	-0.560729
RA138 - 4		2022-11-28 21:03:57	36.974	110	41785.5	296.002	7623.32	147.608	804967	6720.43	0.0532269	0.000341469	0.182601	0.00301314		16.6362	0.292376	0.182601	0.00150648	-0.0632596
RA138 - 5		2022-11-28 21:08:33	36.975	110	39263.5	251.958	6673.82	107.75	768114	7168.47	0.0523746	0.000350479	0.170241	0.00276088		16.9058	0.297549	0.170241	0.00138043	-0.13782
RA138 - 6		2022-11-28 21:09:57	37.006	110	39969.1	281.681	6085.17	117.994	795211	6532.94	0.0516099	0.000328759	0.151267	0.00242889		17.156	0.301441	0.151267	0.00121445	-0.106534
RA138 - 7		2022-11-28 21:11:22	36.854	110	43052.1	720.558	7979.65	150.201	820431	18271.2	0.0539335	0.000463692	0.182184	0.00403541		16.4167	0.292319	0.182184	0.00201774	-0.468233
RA138 - 8		2022-11-28 21:12:46	36.966	110	36730	173.628	5477.33	79.9064	734127	4120.54	0.0513208	0.000322841	0.149494	0.00233812		17.2523	0.303009	0.149494	0.00114343	0.0602422
RA138 - 9		2022-11-28 21:14:11	36.942	110	43712.4	433.094	9296.84	254.144	793590	5887.07	0.056429	0.000462521	0.212013	0.0043013		15.6904	0.278644	0.212013	0.00215076	-0.427786
RA138 - 10		2022-11-28 21:15:35	36.966	110	41625.1	307.881	9486.4	194.187	748305	5880.39	0.056977	0.000465801	0.227516	0.00389999		15.5395	0.275925	0.227516	0.00195014	-0.242929
RA138 - 11		2022-11-28 21:18:34	36.978	110	43015.8	573.766	7499.23	277.782	826016	7785.22	0.0530956	0.000532428	0.174944	0.00474161		16.6755	0.30003	0.174944	0.00237102	-0.638971
RA138 - 12		2022-11-28 21:19:59	37.006	110	44904.1	460.996	8995	269.273	836672	8019.18	0.054917	0.000505971	0.200363	0.00473597		16.1226	0.28832	0.200363	0.00236825	-0.621507
RA138 - 13		2022-11-28 21:21:22	37.014	110	49206	529.704	9194.71	189.257	937005	14774.9	0.0540138	0.000438187	0.187283	0.00360074		16.3923	0.290951	0.187283	0.0018006	-0.514975
RA138 - 14		2022-11-28 21:24:12	36.946	110	41584	316.282	7235.53	134.244	802344	6398.91	0.0531136	0.000339302	0.173804	0.00259619		16.6706	0.29294	0.173804	0.00129828	0.0119037
RA138 - 15		2022-11-28 21:30:24	37.054	110	45433	307.239	10192.9	148.997	815041	6129.51	0.0570936	0.000438246	0.225272	0.00307732		15.5102	0.27454	0.225272	0.00153894	-0.103302
RA138 - 16		2022-11-28 21:31:49	37.013	110	43959.9	320.064	10240.3	171.752	777023	6566.37	0.0581021	0.000404082	0.232797	0.00355561		15.2415	0.268645	0.232797	0.00177813	-0.0686032
RA138 - 17		2022-11-28 21:33:14	36.986	110	42732.7	293.34	8145.7	137.923	813508	7147.97	0.0538849	0.000393215	0.190188	0.00296985		16.4349	0.290249	0.190188	0.0014852	-0.014155
RA138 - 18		2022-11-28 21:34:37	36.977	110	43202	390.051	8120.52	174.04	819390	8839.86	0.0541141	0.000429845	0.187816	0.00342977		16.366	0.290169	0.187816	0.0017152	-0.247707
RA138 - 19		2022-11-28 21:36:03	37.008	110	43841.9	363.187	7339.61	211.88	850503	6468.87	0.0528018	0.000445359	0.16618	0.00404482		16.7734	0.298344	0.16618	0.00202278	-0.261608
RA138 - 20		2022-11-28 21:38:52	36.965	110	46186.5	317.569	10735.2	169.514	810582	6258.88	0.0583093	0.000355219	0.232485	0.0029816		15.1906	0.266532	0.232485	0.00149106	-0.169364
RA138 - 21		2022-11-28 21:40:16	36.982	110	46691.7	512.985	9815.88	277.425	864629	7996.71	0.0553776	0.000479831	0.20858	0.00416173		15.9956	0.284951	0.20858	0.00208121	-0.2636
RA138 - 22		2022-11-28 21:41:41	36.966	110	45202.2	603.722	10589	394.337	801729	10594.3	0.0582526	0.000766653	0.232038	0.00580903		15.207	0.281179	0.232038	0.00290496	-0.737718
RA138 - 23		2022-11-28 21:44:40	36.974	110	46244.5	353.627	6694.36	153.071	934675	8597.92	0.0507763	0.000317094	0.144871	0.00280068		17.4484	0.306382	0.144871	0.00140052	-0.0704929
RA138 - 24		2022-11-28 21:46:04	36.993	110	42188.9	312.602	7116.76	158.231	828392	8582.6	0.0523126	0.000416855	0.168688	0.00342611		16.9371	0.300344	0.168688	0.00171323	-0.188023
RA138 - 25		2022-11-28 21:50:39	37.02	110	44839.9	294.803	7990.11	165.469	866860	6227.52	0.0528634	0.00033787	0.177932	0.00324379		16.7647	0.294598	0.177932	0.00162196	-0.124926
RA138 - 26		2022-11-28 21:52:04	37.011	110	41149.9	393.768	6675.95	225.765	806379	6531.14	0.05232	0.000569948	0.160802	0.00397737		16.9402	0.306917	0.160802	0.00198873	-0.553712
RA138 - 27		2022-11-28 21:53:29	36.958	110	41075.7	438.272	6920.65	150.615	807877	8465.15	0.0521373	0.00038861	0.166332	0.00268813		17.0011	0.300525	0.166332	0.00134407	-0.132715
RA138 - 28		2022-11-28 21:54:53	36.957	110	43764	321.193	7855.7	139.992	846005	7771.12	0.0529385	0.000340622	0.178453	0.00256422		16.7452	0.294322	0.178453	0.00128208	0.0271692
RA138 - 29		2022-11-28 21:56:18	36.991	110	50081.2	1295.67	11749.5	772.943	864715	12278.1	0.0575123	0.00106977	0.238532	0.0108785		15.415	0.302494	0.238532	0.00543897	-0.841941
RA138 - 30		2022-11-28 21:57:42	37.023	110	44965.6	269.66	8384.84	111.031	858096	7130.93	0.053784	0.000392052	0.186359	0.00240448		16.4852	0.291123	0.186359	0.00120214	0.0652323
RA138 - 31		2022-11-28 21:59:05	36.99	110	45452.9	313.916	7264.09	154.483	897048	7477.03	0.0518286	0.000335844	0.159847	0.00284516		17.1088	0.300784	0.159847	0.00142245	-0.175388
RA138 - 32		2022-11-28 22:00:31	36.95	110	44381.5	275.595	9161.75	167.236	813856	5971.91	0.0558707	0.000395381	0.206307	0.0033369		15.8727	0.279963	0.206307	0.00166824	-0.121572
RA138 - 33		2022-11-28 22:01:55	36.951	110	44368.3	312.231	6345.78	136.778	892330	9382.27	0.0510637	0.000424457	0.142891	0.00280101		17.3688	0.308683	0.142891	0.00140031	-0.196181
RA138 - 34		2022-11-28 22:03:20	36.992	110	43727.5	235.959	8443.62	149.678	824350	7524.06	0.0544213	0.000474673	0.194293	0.003382		16.299	0.29047	0.194293	0.00169072	-0.395692
RA138 - 35		2022-11-28 22:04:45	36.961	110	44134.2	339.961	8208.71	167.37	841416	8107.88	0.0539417	0.000372561	0.185088	0.00308739		16.4458	0.289795	0.185088	0.00154343	-0.0629153
RA138 - 36		2022-11-28 22:12:37	36.988	110	47275.9	567.452	9178.36	303.499	880712	8928.78	0.0550346	0.00063147	0.193652	0.00480391		16.1308	0.293693	0.193652	0.00240147	-0.570311
RA138 - 37		2022-11-28 22:14:02	36.962	110	43864.7	250.115	6018.59	106.685	898400	6853.8	0.0500821	0.000315852	0.137118	0.002374		17.7284	0.311397	0.137118	0.00118677	0.0183379
RA138 - 38		2022-11-28 22:15:25	36.975	110	46390.1	461.088	8782.34	370.355	873046	8828.18	0.0544819	0.000753897	0.188869	0.00633223		16.2991	0.303378	0.188869	0.00316554	-0.772577
RA138 - 39		2022-11-28 22:16:50	36.99	110	44088.4	289.652	7367.47	140.861	863365	7601.82	0.0523341	0.000365765	0.16694	0.00292989		16.9705	0.299178	0.16694	0.00146469	0.00525764
RA138 - 40		2022-11-28 22:18:15	37.006	110	42935.1	308.936	6425.86	121.901	858285	7174.36	0.0512141	0.000290725	0.14968	0.00249936		17.3443	0.303717	0.14968	0.00124948	-0.240424
RA138 - 41		2022-11-28 22:19:40	36.996	110	44242.7	283.455	9509.75	170.757	799641	6817.51	0.056777	0.000432919	0.214126	0.00335429		15.6474	0.276882	0.214126	0.00167691	-0.240133
RA138 - 42		2022-11-28 22:21:04	36.993	110	49298.7	361.825	11997.5	191.792	853110	8056.93	0.0593051	0.000410806	0.242505	0.00302063		14.9828	0.264044	0.242505	0.00151011	-0.151356
RA138 - 43		2022-11-28 22:22:28	36.974	110	48199.3	341.19	10357.4	173.76	880042	6604.63	0.0560275	0.000383183	0.214553	0.00306381		15.8619	0.279401	0.214553	0.00153172	-0.0808785
RA138 - 44		2022-11-28 22:23:53	36.99	110	48060.1	344.597	8632.98	159.402	921301	8079.79	0.0535098	0.000392329	0.179897	0.00293573		16.611	0.293419	0.179897	0.00146772	-0.116637
RA138 - 45		2022-11-28 22:25:18	36.972	110	44330.7	297.409	7005.14	131.82	877907	7929.45	0.0517583	0.000347822	0.157951	0.00253895		17.1761	0.302354	0.157951	0.00126937	-0.105246
RA138 - 46		2022-11-28 22:26:42	36.98	110	44218.9	449.702	7442.36	135.785	868939	9945.41	0.0521668	0.000313909	0.167955	0.00232309		17.0446	0.298954	0.167955	0.00116147	0.0371578
RA138 - 47		2022-11-28 22:31:18	36.981	110	45201.2	346.499	6144.81	126.545	914195	8545.13	0.0507424	0.000314609	0.136287	0.00243736		17.5337	0.307811	0.136287	0.00121867	0.00815624
C_WC1
WC-1 - 1		2022-11-28 14:07:01	38.728	110	44756.3	323.711	5960.79	199.271	1.13076e+06	9122.93	0.0405629	0.000297043	0.133064	0.00348555		22.4285	0.396158	0.133064	0.00174277	-0.117838
WC-1 - 2		2022-11-28 14:08:26	35.655	110	42794.3	400.44	4823.13	81.1979	1.1017e+06	10494.3	0.0399681	0.000273921	0.11356	0.001785		22.7663	0.401052	0.11356	0.000892502	0.267468
WC-1 - 3		2022-11-28 14:49:02	37.705	110	43170.6	359.542	6320.9	99.891	1.01932e+06	9428.21	0.0433471	0.000238942	0.146988	0.00198391		21.0653	0.368599	0.146988	0.000991957	0.117069
WC-1 - 4		2022-11-28 14:50:28	19.193	110	39233.4	314.357	5293.71	85.5605	985754	9567.78	0.0415334	0.000369748	0.135287	0.00232681		21.9867	0.392322	0.135287	0.00116341	0.425649
WC-1 - 5		2022-11-28 14:50:57	8.126	110	39282.2	370.527	5247.26	167.342	952459	10578.2	0.041336	0.000567886	0.133679	0.00435647		22.0922	0.410799	0.133679	0.00217824	0.137667
WC-1 - 6		2022-11-28 15:29:09	36.954	110	42339	331.286	5157.23	74.9333	1.09773e+06	12138.1	0.039645	0.000237254	0.121875	0.00159827		23.0477	0.40418	0.121875	0.000799137	0.225986
WC-1 - 7		2022-11-28 15:30:41	15.331	110	66714.1	394.325	6617.6	132.166	1.72522e+06	10371.8	0.0396177	0.000264837	0.0996163	0.00216694		23.0631	0.405907	0.0996163	0.00108347	0.126827
WC-1 - 8		2022-11-28 16:11:24	38.643	110	53861.7	516.113	6284.7	112.162	1.39926e+06	19434.5	0.0396047	0.000258157	0.117944	0.00197079		23.0319	0.404996	0.117944	0.000985397	-0.0390263
WC-1 - 9		2022-11-28 16:12:51	37.006	110	44847.8	474.863	6705.52	128.721	1.08657e+06	11755.5	0.0423369	0.000308667	0.150086	0.00200091		21.5435	0.380454	0.150086	0.00100045	-0.249894
WC-1 - 10		2022-11-28 16:52:09	36.997	110	37806.6	299.4	4574.66	88.9016	981489	8617.78	0.0394918	0.000248734	0.120754	0.00211211		23.0187	0.404303	0.120754	0.00105606	-0.0607475
WC-1 - 11		2022-11-28 16:53:34	36.539	110	38617.5	359.074	5422.47	208.382	958933	10307.5	0.0412945	0.00027105	0.139273	0.00481162		22.0107	0.387133	0.139273	0.00240581	0.0107955
WC-1 - 12		2022-11-28 17:34:23	36.986	110	31688.3	238.552	3681.62	63.5491	839634	7660.12	0.0387748	0.000293331	0.116065	0.00182953		23.332	0.412711	0.116065	0.000914766	0.107722
WC-1 - 13		2022-11-28 17:35:47	25.678	110	37595	517.46	5040.01	211.037	948147	6662.73	0.0411548	0.000442738	0.133813	0.00581886		21.9789	0.397759	0.133813	0.00290943	-0.00507908
WC-1 - 14		2022-11-28 18:06:37	22.426	110	34969.8	1004.07	4478.9	184.035	912725	12969.1	0.0409493	0.000553212	0.128921	0.00472959		22.0014	0.40819	0.128921	0.0023648	0.0492738
WC-1 - 15		2022-11-28 18:08:02	23.587	110	28658.5	353.679	3667.19	111.033	733095	5660.91	0.0407982	0.000394604	0.1288	0.0033014		22.0788	0.39617	0.1288	0.0016507	-0.0455254
WC-1 - 16		2022-11-28 18:20:14	21.971	110	23886.5	228.558	2823.75	67.6244	631321	5890.26	0.0380264	0.000376281	0.118174	0.00270024		23.6498	0.425079	0.118174	0.00135012	0.187139
WC-1 - 17		2022-11-28 18:21:23	37.002	110	36561.8	252.954	3994.59	66.6853	979522	8455.62	0.0383369	0.000266186	0.109203	0.00175681		23.4547	0.413384	0.109203	0.000878407	0.228051
WC-1 - 18		2022-11-28 19:00:43	34.857	110	38510.2	445.648	5554.36	239.149	926282	8734.07	0.0422626	0.00034122	0.143474	0.00561724		21.1672	0.375607	0.143474	0.00280862	0.0525738
WC-1 - 19		2022-11-28 19:02:06	36.969	110	38266.2	282.578	5427.44	104.5	977929	7531.11	0.0401629	0.000266678	0.1409	0.00222776		22.2699	0.391852	0.1409	0.00111388	0.158797
WC-1 - 20		2022-11-28 19:42:39	32.069	110	20871.8	273.516	2094.13	78.4158	553725	6505.78	0.0389244	0.000343973	0.104649	0.00376512		22.8708	0.407912	0.104649	0.00188256	0.0025586
WC-1 - 21		2022-11-28 19:44:07	37.03	110	34044.9	304.311	4306.54	86.1128	873744	8729.74	0.0399745	0.000299414	0.126186	0.0024302		22.2667	0.39369	0.126186	0.0012151	0.150951
WC-1 - 22		2022-11-28 20:23:13	36.99	110	30689.1	412.895	3872.33	139.509	785360	9175.45	0.0400483	0.00037683	0.126297	0.00469797		22.1504	0.396682	0.126297	0.00234899	0.0198496
WC-1 - 23		2022-11-28 20:26:17	37.007	110	31041.8	251.574	3659.62	57.5464	816244	9544.21	0.0390613	0.000301494	0.11812	0.00194974		22.7055	0.402006	0.11812	0.000974871	0.344976
WC-1 - 24		2022-11-28 21:05:52	17.52	110	28341	480.953	4579.83	775.601	728755	6801.47	0.0389942	0.000687503	0.158939	0.0269122		22.7076	0.440488	0.158939	0.0134561	0.0246646
WC-1 - 25		2022-11-28 21:06:57	36.974	110	36830.2	1107.51	5091.15	614.024	932885	6087.06	0.0404437	0.00123399	0.137689	0.0157562		21.8934	0.504649	0.137689	0.0078781	0.0907331
WC-1 - 26		2022-11-28 21:47:39	36.988	110	28818.9	255.415	3028.61	62.2488	788642	5191.94	0.0374735	0.000288975	0.104694	0.00227727		23.6459	0.418638	0.104694	0.00113864	0.190468
WC-1 - 27		2022-11-28 21:49:02	38.603	110	32367.2	790.701	4638.09	318.929	818047	9021.71	0.0408082	0.000830352	0.144542	0.0115218		21.7153	0.435437	0.144542	0.00576088	0.114062
WC-1 - 28		2022-11-28 22:28:16	37.688	110	30640	218.052	4336.36	111.539	757549	5107.21	0.0414051	0.000343011	0.142519	0.00371004		21.4791	0.381662	0.142519	0.00185502	-0.208958
WC-1 - 29		2022-11-28 22:29:53	26.816	110	32494.3	836.757	3792.83	606.543	836276	8430.06	0.0391306	0.00085506	0.113388	0.0177566		22.7324	0.464739	0.113388	0.0088783	0.0383275
WC-1 - 30		2022-11-28 22:33:01	5.994	110	39351.9	517.825	3638.7	414.876	1.06022e+06	9556.61	0.038035	0.000535384	0.0905175	0.00876505		23.3973	0.436543	0.0905175	0.00438253	0.103982
WC-1 - 31		2022-11-28 22:33:08	6.254	110	52661.6	1972.87	14320.8	1422.72	1.0168e+06	8440.45	0.0520098	0.0021851	0.269621	0.0216234		17.1108	0.465421	0.269621	0.0108117	-0.398956
WC-1 - 32		2022-11-28 22:34:16	33.761	110	32915.4	476.002	2720.38	122.621	898746	10955	0.0381912	0.000322288	0.0823004	0.00371945		23.3057	0.414544	0.0823004	0.00185973	0.0116688
C_RA138
RA138 - 1		2022-12-22 15:16:26	37.504	110	42629.5	514.649	8725.19	289.423	768525	8961.84	0.0572176	0.000601761	0.203149	0.00516788		16.1681	0.301339	0.204726	0.00258428	0.427206
RA138 - 2		2022-12-22 15:17:48	37.507	110	43538.3	325.288	7277.63	203.137	826034	8352.36	0.0544116	0.00045628	0.168155	0.00435616		17.0021	0.312255	0.167196	0.00217832	0.808526
RA138 - 3		2022-12-22 16:00:46	37.513	110	37776.5	343.142	5780.6	87.9417	744556	9832.41	0.0526758	0.000346789	0.153153	0.00233379		17.5587	0.319237	0.153059	0.00116654	0.498204
RA138 - 4		2022-12-22 16:02:08	37.513	110	43257.4	269.219	5593.08	67.8744	878432	7997.12	0.0510278	0.000292491	0.129623	0.00163338		18.1253	0.32823	0.12933	0.00081644	0.218832
RA138 - 5		2022-12-22 16:43:35	37.532	110	45440.1	325.806	7495.11	156.529	868379	8029.53	0.0542468	0.000331391	0.164704	0.00290814		17.0302	0.308923	0.164986	0.00145455	0.284928
RA138 - 6		2022-12-22 16:44:57	37.515	110	49457.5	338.492	11268.7	159.36	855499	8903.88	0.0598669	0.000405943	0.227989	0.00301905		15.4307	0.280827	0.227902	0.0015101	0.578814
RA138 - 7		2022-12-22 17:28:07	37.504	110	50598.4	755.221	12008	494.786	862951	7743.24	0.0605512	0.000674443	0.235556	0.00603941		15.225	0.285132	0.23738	0.00302014	0.949172
RA138 - 8		2022-12-22 17:29:29	37.506	110	49262.3	459.911	10378.3	224.933	879311	8705.85	0.0579234	0.000337902	0.210055	0.00326938		15.9144	0.288322	0.210728	0.00163485	0.402422
RA138 - 9		2022-12-22 18:10:54	37.503	110	41706	307.873	6272.75	116.718	813899	7495.94	0.0530072	0.000310654	0.150243	0.00223167		17.344	0.31426	0.150442	0.00111523	0.404897
RA138 - 10		2022-12-22 18:12:16	37.506	110	45902.8	376.964	6433.92	105.527	917149	8903.75	0.0517339	0.000289094	0.140094	0.00191144		17.7692	0.321581	0.140199	0.000955217	0.250598
RA138 - 11		2022-12-22 18:55:27	37.503	110	44584.7	594.27	11295.7	358.245	763984	6921.14	0.0600397	0.000688439	0.252446	0.00529897		15.2592	0.286528	0.253418	0.00265003	0.885474
RA138 - 12		2022-12-22 18:56:49	37.522	110	42238.3	309.506	6554.71	107.443	838930	7921.24	0.0521183	0.000322409	0.154871	0.00224933		17.5764	0.318946	0.155223	0.00112491	0.361955
RA138 - 13		2022-12-22 19:38:17	34.3001	110	45796.7	421.301	7299.99	149.906	891603	8353.67	0.0527986	0.000353068	0.159568	0.00257215		17.2858	0.31444	0.15944	0.00128661	0.631662
RA138 - 14		2022-12-22 19:39:36	37.506	110	47440.6	445.445	10039.2	295.431	874045	8184.52	0.0563159	0.000522593	0.210016	0.00471296		16.2042	0.299338	0.211669	0.00235743	0.803877
RA138 - 15		2022-12-22 20:22:49	37.506	110	46819.5	557.677	9439.91	360.105	868722	10351.2	0.0554481	0.000599009	0.199853	0.00531165		16.3889	0.306123	0.201674	0.00265502	0.9562
RA138 - 16		2022-12-22 20:24:11	37.504	110	46918.5	397.699	9841.54	240.304	857641	7780.95	0.0564557	0.000538571	0.210662	0.00437579		16.0941	0.297837	0.209811	0.00218717	0.902565
RA138 - 17		2022-12-22 21:05:11	37.524	110	45680.2	329.47	6425.62	82.299	928771	9189.53	0.0508734	0.000259454	0.14117	0.00168702		17.7856	0.321236	0.1407	0.000843132	0.324967
RA138 - 18		2022-12-22 21:06:33	37.506	110	48198.7	318.901	6856.56	97.1201	975541	9141.2	0.0511524	0.0002521	0.142281	0.00178799		17.6861	0.319228	0.142292	0.000893603	0.204386
RA138 - 19		2022-12-22 21:48:56	37.503	110	48256.7	586.638	12430.2	415.164	822627	7183.53	0.0605447	0.000687945	0.254865	0.00597102		14.8769	0.279114	0.257649	0.0029868	0.876541
RA138 - 20		2022-12-22 21:50:18	37.518	110	47211.9	380.331	8587.82	153.323	914834	9587.72	0.0533902	0.000348377	0.181823	0.00276948		16.8681	0.306593	0.181945	0.00138536	0.482819
RA138 - 21		2022-12-22 22:31:06	37.505	110	47212.7	400.278	8358.06	150.232	920917	9128.33	0.0529632	0.000345859	0.176929	0.00239237		16.9332	0.307785	0.177074	0.00119627	0.607597
RA138 - 22		2022-12-22 22:32:28	37.528	110	45899.4	345.744	7613.13	119.937	905902	9137.62	0.0524209	0.000325049	0.166169	0.00223532		17.1061	0.310432	0.165907	0.0011177	0.368756
RA138 - 23		2022-12-22 23:14:55	37.505	110	49109	455.062	10036.8	243.967	913009	9374.38	0.0556623	0.000411335	0.203398	0.00385135		16.0432	0.292924	0.204429	0.00192513	0.644859
RA138 - 24		2022-12-22 23:16:17	37.505	110	50290.7	412.788	12606.5	241.404	874936	6856.53	0.0593619	0.000395867	0.249724	0.00362531		15.0414	0.273587	0.250736	0.00181214	0.577236
RA138 - 25		2022-12-22 23:57:41	37.504	110	41834.6	296.615	6272.73	95.8334	844548	8156	0.0512527	0.000285717	0.149864	0.00190445		17.3564	0.314093	0.149979	0.000952203	0.252122
RA138 - 26		2022-12-22 23:59:03	37.504	110	44683.6	415.366	8145.84	187.613	874521	8845.15	0.0529248	0.000357995	0.182364	0.00298293		16.8061	0.305833	0.182346	0.00149147	0.642699
RA138 - 27		2022-12-23 00:42:04	37.503	110	44244.1	370.042	9089.73	150.869	838889	8250.24	0.0546616	0.000345678	0.204775	0.00259028		16.217	0.29447	0.205496	0.00129556	0.537327
RA138 - 28		2022-12-23 00:43:26	37.517	110	50128.9	720.084	13388.2	494.994	850586	8054	0.0607526	0.000943314	0.265819	0.00618553		14.5897	0.284402	0.267142	0.00309363	0.947679
RA138 - 29		2022-12-23 01:24:33	37.504	110	49380	316.747	11430.4	185.084	894697	8112.05	0.0571847	0.000353991	0.231369	0.00318366		15.4589	0.280526	0.231537	0.00159136	0.588202
RA138 - 30		2022-12-23 01:25:55	37.504	110	46159.3	401.643	8944.06	207.48	882223	7589.59	0.0540499	0.000435566	0.193163	0.0034379		16.3542	0.299757	0.193813	0.00171844	0.736592
RA138 - 31		2022-12-23 02:06:55	37.506	110	48366.2	460.008	10112.8	251.132	897696	9123.22	0.0557288	0.000355444	0.207668	0.00370631		15.8309	0.287534	0.20914	0.00185351	0.605566
RA138 - 32		2022-12-23 02:08:17	37.507	110	48229.3	419.881	10213.5	209.91	887015	7620.41	0.0563068	0.00059523	0.213747	0.00375201		15.6676	0.29213	0.211822	0.00187639	0.575434
RA138 - 33		2022-12-23 02:50:41	37.504	110	42433	308.014	6594.78	103.341	846405	9239.85	0.0517425	0.000353986	0.155944	0.00243595		17.0306	0.310041	0.155455	0.00121774	0.51525
RA138 - 34		2022-12-23 02:52:02	37.506	110	43681.3	250.085	6623.95	80.4383	890067	7059.59	0.0507811	0.000289	0.151391	0.00170453		17.3527	0.314182	0.151681	0.000852097	0.163558
RA138 - 35		2022-12-23 03:33:14	37.62	110	43940.9	401.065	8105.28	147.318	845690	8903.6	0.0538228	0.000344967	0.183791	0.00245773		16.3705	0.297379	0.184505	0.001229	0.387168
RA138 - 36		2022-12-23 03:34:36	37.504	110	45762.9	370.011	8226.58	143.631	887704	9078.26	0.0534855	0.000323824	0.180784	0.00271094		16.474	0.298757	0.17981	0.00135565	0.410673
RA138 - 37		2022-12-23 04:17:18	37.504	110	49285.8	339.193	11857.4	169.801	878169	8650.22	0.058105	0.000382124	0.240962	0.00318066		15.1805	0.27599	0.240646	0.00159039	0.58761
RA138 - 38		2022-12-23 04:18:40	37.568	110	48242.3	415.138	9511.24	148.465	922514	9406.45	0.0541376	0.000373132	0.198534	0.00293023		16.2939	0.296708	0.197205	0.00146516	0.487886
RA138 - 39		2022-12-23 04:45:57	37.506	110	49193.6	368.325	10623.5	142.808	910176	8705.44	0.0560062	0.000386641	0.21644	0.00248133		15.772	0.28722	0.216006	0.0012406	0.595213
RA138 - 40		2022-12-23 04:47:19	37.506	110	45688	295.134	9342.41	151.408	858238	9009.42	0.0550717	0.000405642	0.205562	0.00336564		16.0409	0.292844	0.204534	0.00168274	0.658375
C_WC1
WC-1 - 1		2022-12-22 15:15:00	37.503	110	37036	331.077	4381.73	66.2858	935430	12200.8	0.0410607	0.000265654	0.118446	0.0017907		22.5298	0.409387	0.11834	0.000895481	0.257165
WC-1 - 2		2022-12-22 15:57:58	37.52	110	41200.5	278.311	4785.61	78.9928	1.05604e+06	8247.45	0.0403087	0.0002192	0.116052	0.00173824		22.9468	0.415022	0.116183	0.000868879	0.423074
WC-1 - 3		2022-12-22 15:59:20	21.6545	110	44480.1	512.668	5695.53	118.255	1.1225e+06	10788	0.0416366	0.000395913	0.128086	0.00236		22.2145	0.411013	0.128079	0.00117966	0.288984
WC-1 - 4		2022-12-22 16:40:45	37.505	110	47004.3	349.239	5837.78	152.654	1.18267e+06	7488.97	0.0410714	0.000336393	0.123229	0.0022815		22.4957	0.412653	0.124228	0.00114106	0.895798
WC-1 - 5		2022-12-22 16:42:09	37.51	110	37451.6	244.604	4448.83	74.721	932472	5757.99	0.0414148	0.000237179	0.119068	0.00192917		22.308	0.403965	0.118819	0.000964868	0.003794
WC-1 - 6		2022-12-22 17:25:17	38.1445	110	32858.7	178.563	3222.13	57.5001	865680	5823.81	0.0391792	0.000243348	0.0984025	0.0017744		23.5338	0.427101	0.0980848	0.000887401	0.270386
WC-1 - 7		2022-12-22 17:26:40	37.503	110	31501.6	200	4079.35	54.2762	774866	6735.76	0.0420745	0.000257236	0.129819	0.00168227		21.9127	0.397498	0.129529	0.000841273	0.283337
WC-1 - 8		2022-12-22 18:08:04	37.504	110	28144.3	196.421	3118.51	51.4038	738546	7217.9	0.0394442	0.000257804	0.111041	0.00191233		23.3125	0.423748	0.110832	0.000955627	0.167138
WC-1 - 9		2022-12-22 18:09:28	37.504	110	31207.3	302.288	3183.81	54.9407	817598	9176.23	0.0394754	0.000254056	0.102043	0.00170287		23.2918	0.423163	0.102047	0.000850967	0.254834
WC-1 - 10		2022-12-22 18:52:36	37.504	110	34643.3	202.016	4539.97	57.5085	873411	6594.51	0.0409125	0.000240883	0.131208	0.0017228		22.3985	0.405893	0.131082	0.000861549	0.362579
WC-1 - 11		2022-12-22 18:54:00	37.505	110	36779.3	337.11	3777.29	94.2215	1.00952e+06	9514.65	0.0376641	0.000258973	0.102972	0.00217577		24.3274	0.442959	0.102727	0.00108809	0.578858
WC-1 - 12		2022-12-22 19:35:24	37.507	110	31070.9	257.963	3378.48	55.0634	827513	9317.37	0.0388161	0.000224619	0.108986	0.00183356		23.519	0.426005	0.108762	0.000917169	0.187832
WC-1 - 13		2022-12-22 19:36:48	37.517	110	30282.8	179.325	3933.74	55.0996	762727	6469.39	0.0411623	0.000260679	0.129856	0.00193175		22.1755	0.402683	0.129933	0.000966279	0.332579
WC-1 - 14		2022-12-22 20:19:59	37.505	110	30729.6	226.307	3692.53	63.0509	833242	7512.82	0.0381673	0.000234029	0.120523	0.00219639		23.8159	0.432058	0.120192	0.00109792	-0.0255667
WC-1 - 15		2022-12-22 20:21:22	37.504	110	31369	256.291	3435.31	50.5291	840172	10301.2	0.0386912	0.000246105	0.10967	0.0018357		23.4901	0.426612	0.10954	0.000917591	0.289322
WC-1 - 16		2022-12-22 21:02:23	37.504	110	38075.4	329.518	4240.81	69.7473	978981	9488.48	0.0402803	0.00026307	0.111448	0.00167107		22.4694	0.408413	0.111407	0.000835131	0.334193
WC-1 - 17		2022-12-22 21:03:45	37.503	110	28509.5	200.341	3473.74	56.1907	742201	6654.18	0.0398464	0.000250201	0.121896	0.0019782		22.7109	0.412298	0.121875	0.000988638	0.182716
WC-1 - 18		2022-12-22 21:46:07	37.505	110	35873.1	328.206	4297.7	66.3902	933007	11839.1	0.0398256	0.000244288	0.119751	0.00177948		22.6232	0.410426	0.119833	0.000890099	0.174144
WC-1 - 19		2022-12-22 21:47:30	37.504	110	36262	226.384	4023.3	62.7061	966391	7767.23	0.0387583	0.000213769	0.110914	0.00165147		23.2428	0.420512	0.110979	0.000826083	0.208022
WC-1 - 20		2022-12-22 22:28:18	37.504	110	33284.7	238.468	3481.9	52.0135	900511	8182.48	0.0382782	0.000234836	0.104751	0.00157343		23.4362	0.425176	0.104636	0.000786804	0.242562
WC-1 - 21		2022-12-22 22:29:40	37.618	110	26979.7	211.699	3130.26	56.3826	727362	7925.94	0.0383874	0.000255029	0.116291	0.00208085		23.3662	0.424953	0.116052	0.00104051	-0.110571
WC-1 - 22		2022-12-22 23:12:07	37.57	110	35835	219.101	4263.68	62.083	925391	7100.86	0.0400737	0.000240541	0.119119	0.00172624		22.2899	0.404134	0.119011	0.000862894	0.311081
WC-1 - 23		2022-12-22 23:13:29	37.516	110	38330.4	302.629	3692.67	55.8742	1.0202e+06	11037.6	0.0389235	0.000230381	0.0966741	0.00153567		22.9456	0.415864	0.096362	0.000767625	0.0980683
WC-1 - 24		2022-12-22 23:56:15	37.506	110	41287	362.022	6039.14	96.9524	1.07353e+06	11125.3	0.0397588	0.000234447	0.146777	0.0022331		22.3767	0.405514	0.146309	0.00111651	0.474144
WC-1 - 25		2022-12-23 00:39:15	37.508	110	42805.2	384.853	4949.58	63.9529	1.14604e+06	15294.9	0.0387325	0.000259433	0.116002	0.00172181		22.8911	0.416426	0.115659	0.000861197	0.32818
WC-1 - 26		2022-12-23 00:40:38	37.506	110	37021.1	356.77	4541.83	67.2918	975788	12330.4	0.0392958	0.000227077	0.123101	0.00194133		22.5607	0.408633	0.122713	0.000970978	0.135957
WC-1 - 27		2022-12-23 01:21:45	37.504	110	36569.2	313.642	4566.46	68.5124	974601	10651.9	0.0387792	0.00024744	0.125651	0.00183645		22.7997	0.414113	0.124903	0.000917954	0.330696
WC-1 - 28		2022-12-23 01:23:07	37.504	110	24689.4	256.177	2590.7	55.7297	664647	7835.19	0.0384556	0.000309651	0.105045	0.00209343		22.9897	0.421364	0.104958	0.0010464	0.235952
WC-1 - 29		2022-12-23 02:04:06	37.504	110	40960.9	327.077	4972.16	116.508	1.06887e+06	11578.7	0.0396296	0.000229078	0.121582	0.00283397		22.2645	0.403271	0.121418	0.00141723	0.035272
WC-1 - 30		2022-12-23 02:05:28	37.503	110	32497.4	285.812	3699.9	60.7731	841235	10290.6	0.0400321	0.000276961	0.114567	0.00189672		22.0394	0.401387	0.113881	0.000948535	0.180854
WC-1 - 31		2022-12-23 02:47:51	37.504	110	42646.9	317.684	5770.61	97.12	1.11076e+06	12048.4	0.0396835	0.000246897	0.135669	0.0022785		22.2068	0.403037	0.135345	0.00113905	0.529384
WC-1 - 32		2022-12-23 02:49:13	22.1657	110	30077.2	234.034	3692.46	79.6877	795053	6986.73	0.0398561	0.000362296	0.123339	0.00279022		22.1102	0.407917	0.122797	0.00139486	0.309623
WC-1 - 33		2022-12-23 03:30:25	37.505	110	38810.6	399.981	3360.62	139.698	1.02918e+06	10805.1	0.0390785	0.000319817	0.085745	0.00318253		22.5465	0.413568	0.0866117	0.0015914	0.0783262	x
WC-1 - 34		2022-12-23 03:31:48	37.514	110	24853.7	225.309	2791.71	66.3893	648080	4691.07	0.0395614	0.000319761	0.112142	0.00264022		22.2715	0.408274	0.112354	0.00132025	0.0664846
WC-1 - 35		2022-12-23 04:14:29	37.506	110	35444.4	448.565	3104.33	86.4978	966311	15442.2	0.0380371	0.000262786	0.0878692	0.00210239		23.1871	0.422266	0.087605	0.00105127	0.461863
WC-1 - 36		2022-12-23 04:15:52	37.504	110	16655.5	157.418	1642.27	50.1865	437927	3396.58	0.0393224	0.000423541	0.0985936	0.00321322		22.4303	0.418866	0.0986269	0.00157702	0.0194344
WC-1 - 37		2022-12-23 04:43:08	37.506	110	34914.5	323.327	3407.07	60.0999	948239	11919.4	0.0381944	0.000235693	0.097099	0.00170661		23.1233	0.41957	0.0976079	0.000853251	0.0158219
WC-1 - 38		2022-12-23 04:44:30	37.504	110	31840.9	235.368	3736.05	64.7904	852010	3651.84	0.038602	0.000336115	0.117555	0.00254788		22.881	0.42108	0.117364	0.00110598	-0.0195474
C_RA138
RA138 - 1		2023-01-03 22:41:44	37.503	110	60540.4	454.684	11871.7	232.436	994970	6842.72	0.062009	0.00047917	0.195924	0.00312481		15.8889	0.308599	0.196449	0.000696086	0.524028
RA138 - 2		2023-01-03 22:43:07	37.506	110	61782.8	478.489	12627.6	171.4	1.01077e+06	10842.5	0.0625677	0.000433782	0.204451	0.00242198		15.7463	0.304647	0.204757	0.00054239	0.535667
RA138 - 3		2023-01-03 22:50:06	37.505	110	60516.2	448.58	12702.3	207.915	994259	10909.6	0.0621774	0.000470734	0.209819	0.0029744		15.8413	0.30743	0.210279	0.000675187	0.487869
RA138 - 4		2023-01-03 22:51:29	37.505	110	65088.1	465.265	13399	257.998	1.07238e+06	9949.89	0.0619465	0.000520179	0.206748	0.00356785		15.8995	0.309909	0.206231	0.000812284	0.338132
RA138 - 5		2023-01-03 23:18:27	37.506	110	62286.7	472.599	11951.5	210.829	1.04293e+06	10680	0.060987	0.000434859	0.191906	0.00290538		16.1305	0.31237	0.192225	0.000660362	0.718223
RA138 - 6		2023-01-03 23:19:49	37.504	110	61924	1407.3	12941.3	225.609	1.02472e+06	29306.7	0.0620048	0.000551063	0.206639	0.00395207		15.8646	0.310089	0.209364	0.00089665	0.720377
RA138 - 7		2023-01-03 23:46:51	37.504	110	68259.1	417.312	15100.5	244.468	1.10673e+06	7638.71	0.0629953	0.000438388	0.221094	0.0029775		15.5907	0.301673	0.221623	0.000654719	0.553988
RA138 - 8		2023-01-03 23:48:15	10.4128	110	183773	11264	114629	9404.14	1.01186e+06	8803.13	0.18833	0.011419	0.61243	0.0164462		5.21452	0.186661	0.624878	0.00362062	0.978677
RA138 - 9		2023-01-03 23:48:34	15.4279	110	67124.5	1512.16	19982.8	1174.93	910272	6550	0.0736178	0.00157673	0.293763	0.0111437		13.3396	0.291334	0.298235	0.00245332	0.84804
RA138 - 10		2023-01-04 00:15:04	37.504	110	61212.7	453.933	13026.6	178.693	1.01079e+06	10061.4	0.0618452	0.000411667	0.212782	0.00240813		15.8485	0.306239	0.213193	0.000550101	0.544122
RA138 - 11		2023-01-04 00:16:26	37.514	110	62527.5	374.087	10369.9	106.537	1.11319e+06	10221.7	0.0574269	0.000381977	0.166284	0.00175414		17.066	0.329757	0.166145	0.000400817	0.349626
RA138 - 12		2023-01-04 00:43:20	37.504	110	58175.5	525.176	12226.5	251.432	959927	9756.93	0.0619892	0.000444493	0.209504	0.00305398		15.7733	0.305511	0.210545	0.000686589	0.617961
RA138 - 13		2023-01-04 00:44:42	37.516	110	67918.8	580.013	17452.5	453.173	1.02518e+06	7180.59	0.0677322	0.000632754	0.25571	0.00502289		14.4341	0.282891	0.257425	0.00112936	0.817415
RA138 - 14		2023-01-04 01:11:37	37.506	110	62482	480.088	11548.4	146.685	1.08642e+06	10658.6	0.0587565	0.000364785	0.185092	0.00180732		16.5941	0.320027	0.185161	0.000411987	0.42457
RA138 - 15		2023-01-04 01:12:59	37.506	110	67383.4	1062.34	16050	322.367	1.09551e+06	21959.6	0.0626245	0.000606479	0.233421	0.0047577		15.5669	0.305739	0.238619	0.00108289	0.809177
RA138 - 16		2023-01-04 01:39:58	37.504	110	63054.4	459.336	13515.3	173.607	1.07348e+06	9873.34	0.0600121	0.000395316	0.214602	0.00236556		16.1942	0.312823	0.21473	0.000523423	0.354079
RA138 - 17		2023-01-04 01:41:20	37.511	110	67929.7	539.58	13083	212.92	1.19061e+06	11396.7	0.0582564	0.000385615	0.192405	0.00243652		16.6795	0.322242	0.192944	0.000538678	0.533348
RA138 - 18		2023-01-04 02:08:28	37.504	110	68929.8	505.005	17036	273.05	1.10661e+06	9658.06	0.0637533	0.000444996	0.248003	0.00311728		15.1879	0.293907	0.247596	0.000684627	0.613673
RA138 - 19		2023-01-04 02:09:50	37.503	110	64686.6	450.339	12811.1	175.972	1.12279e+06	9558.02	0.0588934	0.000361066	0.198148	0.00229241		16.4381	0.316916	0.198406	0.000502953	0.546503
RA138 - 20		2023-01-04 02:36:58	37.506	110	70080.1	633.993	17680.4	512.626	1.11695e+06	9802.4	0.0642488	0.000639533	0.251899	0.00556228		15.009	0.295288	0.252743	0.00118391	0.843462
RA138 - 21		2023-01-04 02:38:21	37.506	110	66438.7	481.968	13421.4	240.038	1.16084e+06	9647.59	0.0584304	0.000386168	0.201446	0.00281911		16.5002	0.318764	0.202376	0.000600018	0.397977
RA138 - 22		2023-01-04 03:05:36	37.504	110	69648.9	504.336	18656.3	297.446	1.08406e+06	9583.57	0.0655793	0.000445801	0.267563	0.00311072		14.6378	0.283024	0.268345	0.000675147	0.677295
RA138 - 23		2023-01-04 03:07:11	23.8811	110	72164.2	581.882	21280.4	495.823	1.03308e+06	8503.9	0.0702876	0.000940884	0.293988	0.00544196		13.6536	0.275483	0.295421	0.00118567	0.828703
RA138 - 24		2023-01-04 03:34:25	37.508	110	65723.4	468.519	12192.2	267.204	1.17269e+06	9506.67	0.0573312	0.000430685	0.186347	0.0036587		16.6597	0.323219	0.185843	0.000823101	0.57605
RA138 - 25		2023-01-04 03:35:47	37.511	110	67969.9	507.547	16213.2	290.364	1.11951e+06	9441.95	0.0620144	0.000442999	0.238261	0.00328803		15.3978	0.298199	0.238965	0.000739704	0.619603
RA138 - 26		2023-01-04 04:03:30	37.504	110	64357.4	453.556	15119	221.82	1.07396e+06	9621.41	0.0612693	0.000521474	0.235358	0.00308762		15.5031	0.302373	0.235347	0.000679071	0.601494
RA138 - 27		2023-01-04 04:04:52	37.504	110	63233.6	536.475	12288.6	216.664	1.12849e+06	11745.2	0.0571462	0.00038205	0.194134	0.00232007		16.6171	0.321133	0.194688	0.000510188	0.557095
RA138 - 28		2023-01-04 04:26:58	37.506	110	77281.2	360.004	22479.8	211.108	1.17717e+06	10725.9	0.0671421	0.000499985	0.291322	0.00261303		14.0794	0.273067	0.291409	0.000572524	0.725107
RA138 - 29		2023-01-04 04:28:20	37.504	110	70973.1	811.963	18882.9	640.046	1.12112e+06	10284.8	0.0644847	0.000823697	0.264089	0.00641554		14.6553	0.294236	0.266537	0.001406	0.884088
RA138 - 30		2023-01-04 04:47:03	37.504	110	65974	329.24	15159.5	193.777	1.07192e+06	7334.29	0.0628456	0.000439388	0.229655	0.00265911		14.9767	0.289836	0.230195	0.000591986	0.568586
RA138 - 31		2023-01-04 04:48:25	37.504	110	69879.5	612.641	16802.5	327.433	1.12773e+06	10562.1	0.0633027	0.000493438	0.241701	0.00366409		14.864	0.288794	0.240884	0.000816325	0.745084
C_RA138b
RA138b - 1		2023-01-03 22:54:29	37.506	110	53528.7	376.805	9989.14	102.658	891086	8489.47	0.0614335	0.000383534	0.186601	0.001853		16.0305	0.309201	0.18695	0.00042374	0.540878
RA138b - 2		2023-01-03 22:55:51	37.505	110	55634.4	416.591	10046.2	128.206	952767	9296.41	0.0595687	0.000417653	0.18134	0.00195626		16.5314	0.319953	0.180901	0.000447614	0.527284
RA138b - 3		2023-01-03 22:57:13	37.506	110	65382.2	852.012	22545.5	583.753	855215	8801.71	0.0781934	0.000908604	0.341468	0.0049338		12.5931	0.250617	0.345449	0.00113008	0.884789
RA138b - 4		2023-01-03 22:58:36	37.504	110	46489.5	357.469	7315.26	217.3	818568	9983.91	0.0581833	0.000575955	0.15704	0.00419498		16.9232	0.332829	0.157637	0.00096268	0.717178
RA138b - 5		2023-01-03 22:59:58	37.506	110	62671.1	430.284	9765.22	122.926	1.11509e+06	10257.5	0.0574245	0.00035532	0.155979	0.00152599		17.1458	0.330639	0.156098	0.000350357	0.575751
RA138b - 6		2023-01-03 23:01:20	37.504	110	60730.1	635.289	10923.3	271.553	1.04302e+06	12607.9	0.0595429	0.00053597	0.18095	0.003636		16.5349	0.323405	0.180191	0.000835342	0.735827
RA138b - 7		2023-01-03 23:07:15	37.503	110	5129.01	98.0469	1597.06	54.9357	68707	606.243	0.0765539	0.00165779	0.313439	0.00946818		12.8573	0.281553	0.31194	0.00217605	0.614296
RA138b - 8		2023-01-03 23:08:37	37.504	110	95322.1	710.369	7692.7	92.9084	1.85314e+06	16919.6	0.0524473	0.000284195	0.0807481	0.000908334		18.7658	0.360791	0.0808478	0.000213321	0.244701
RA138b - 9		2023-01-03 23:09:59	37.509	110	69536.8	614.357	6571.8	88.2602	1.335e+06	9053.75	0.0527794	0.000308512	0.0951491	0.00113757		18.6466	0.359081	0.0946789	0.000261181	0.184785
RA138b - 10		2023-01-03 23:11:22	37.503	110	60882.3	378.038	13057.4	142.866	984769	9297.34	0.0631711	0.000507734	0.215667	0.00253736		15.5782	0.303054	0.214856	0.00058183	0.714094
RA138b - 11		2023-01-03 23:12:44	37.504	110	63394.4	894.272	14950.6	507.627	994437	9133.21	0.0653136	0.000810585	0.23831	0.00575431		15.0662	0.301627	0.236261	0.00131877	0.91899
RA138b - 12		2023-01-03 23:14:07	37.504	110	585467	25494.9	464816	21080.4	594700	21513.3	1.01649	0.0556063	0.791647	0.00323196		0.967998	0.0322567	0.795355	0.000740497	0.996599	x
RA138b - 13		2023-01-03 23:22:49	37.504	110	385647	9729.94	297018	8227.12	712550	9989.99	0.559814	0.0183102	0.768153	0.0035273		1.75689	0.0440886	0.77157	0.00079326	0.991062
RA138b - 14		2023-01-03 23:24:12	37.506	110	302941	19559.5	221175	16762.8	1.04092e+06	8417.91	0.29281	0.0171929	0.7035	0.0100581		3.35869	0.117517	0.73141	0.0022598	0.99702	x
RA138b - 15		2023-01-03 23:25:36	37.504	110	60947.4	498.809	9805.93	128.81	1.07171e+06	10248.4	0.0581384	0.000411558	0.160978	0.00184018		16.9145	0.327472	0.161182	0.000413837	0.541004
RA138b - 16		2023-01-03 23:26:58	37.508	110	66576.8	437.736	10769.7	127.576	1.17136e+06	10165.6	0.0580987	0.000352808	0.161902	0.00193539		16.9248	0.326222	0.162055	0.000434189	0.428309
RA138b - 17		2023-01-03 23:28:22	37.504	110	69777.1	721.681	14095.6	307.905	1.16152e+06	12717.7	0.061278	0.00043931	0.20112	0.0029004		16.0455	0.31078	0.202373	0.000649119	0.592582
RA138b - 18		2023-01-03 23:29:44	37.506	110	58169.3	366.199	11936.6	139.276	958572	9608.05	0.061954	0.000467925	0.205711	0.00230437		15.8692	0.307943	0.205575	0.000513355	0.629406
RA138b - 19		2023-01-03 23:35:38	37.513	110	52622.7	441.54	8941.28	110.127	908888	9485.45	0.0591445	0.000379516	0.169905	0.00179172		16.6173	0.320758	0.17022	0.000395658	0.43568
RA138b - 20		2023-01-03 23:37:02	37.504	110	65393.4	719.544	21015.4	389.96	894199	12196.2	0.0746836	0.000678198	0.320998	0.00413531		13.1587	0.257492	0.321948	0.000911362	0.816715
RA138b - 21		2023-01-03 23:38:24	37.508	110	66913.5	571.086	23087	294.845	866294	11311.1	0.0790447	0.000726405	0.345945	0.0036755		12.4317	0.243424	0.345651	0.000808891	0.802949
RA138b - 22		2023-01-03 23:39:48	37.506	110	55111.5	1528.42	19861.2	1141.85	700992	8110	0.0795733	0.00161625	0.352483	0.0096932		12.3481	0.266397	0.361033	0.00213387	0.955195
RA138b - 23		2023-01-03 23:41:10	37.506	110	42416.7	528.165	9238.56	233.869	686645	8818.06	0.0631532	0.000535117	0.216656	0.00381314		15.5573	0.303367	0.218198	0.000838253	0.666135
RA138b - 24		2023-01-03 23:42:51	17.9239	110	107347	3246.7	69227.9	2564.72	572603	7525.44	0.18685	0.00609933	0.64378	0.0066552		5.25766	0.131829	0.646061	0.00146244	0.96553	x
RA138b - 25		2023-01-03 23:51:13	37.506	110	62664.1	620.042	13552.9	316.917	998445	8259.23	0.0639054	0.000514091	0.215569	0.0035458		15.3643	0.298903	0.216669	0.000783234	0.69758
RA138b - 26		2023-01-03 23:52:35	37.504	110	68784	676.471	15180.9	322.657	1.11764e+06	10172.8	0.0628742	0.000469971	0.2196	0.00309687		15.6148	0.302889	0.221102	0.000685037	0.647834
RA138b - 27		2023-01-03 23:53:57	37.512	110	57010.8	605.57	10069.9	162.171	995371	12863.6	0.0585986	0.00039289	0.176222	0.00209178		16.7526	0.323778	0.17695	0.000464114	0.494258
RA138b - 28		2023-01-03 23:55:19	37.504	110	70254.6	1120.25	20274.7	583.427	1.02454e+06	17925.6	0.0701431	0.000766795	0.287352	0.00519771		13.994	0.277129	0.28911	0.00115555	0.733725
RA138b - 29		2023-01-03 23:56:42	37.503	110	58780.3	376.978	16943.1	260.395	862810	11638.8	0.0702294	0.00074816	0.288589	0.00449304		13.9755	0.276231	0.288764	0.00100234	0.812384
RA138b - 30		2023-01-03 23:58:04	37.506	110	59601.1	636.343	17311.1	344.564	865920	11469.1	0.0704493	0.000646464	0.289905	0.00397996		13.9305	0.27275	0.290973	0.000889064	0.759683
RA138b - 31		2023-01-04 00:03:54	37.504	110	68114.6	824.203	29061.3	416.914	728652	9145.3	0.0953101	0.000930326	0.427568	0.00377342		10.2926	0.202248	0.427423	0.000850912	0.67858
RA138b - 32		2023-01-04 00:05:16	37.504	110	60717.3	478.743	12924.5	258.242	996245	7771.43	0.0622215	0.00043774	0.213524	0.00341653		15.7644	0.305143	0.213248	0.000772043	0.764548
RA138b - 33		2023-01-04 00:06:39	37.506	110	57889.2	361.861	9716.12	171.93	1.01215e+06	8835.65	0.0582673	0.000466707	0.169157	0.00286373		16.8325	0.327408	0.168143	0.0006496	0.722619
RA138b - 34		2023-01-04 00:08:01	37.505	110	59518	338.098	7208.09	92.2247	1.11436e+06	7692.4	0.054326	0.000355236	0.12158	0.00146047		18.0519	0.348634	0.121326	0.000331543	0.40009
RA138b - 35		2023-01-04 00:09:23	37.504	110	64298.9	460.115	12104.5	122.244	1.09755e+06	11615.4	0.0599148	0.000410767	0.188424	0.00174365		16.3663	0.31653	0.188594	0.000396782	0.581474
RA138b - 36		2023-01-04 00:10:45	37.507	110	62081.3	433.413	15492.7	188.334	974308	10603.2	0.0651733	0.000459356	0.249786	0.00307453		15.0442	0.29122	0.250006	0.000701236	0.614461
RA138b - 37		2023-01-04 00:19:27	37.504	110	60923.3	617.266	14290.2	391.714	950399	8135.09	0.0654308	0.00062662	0.234102	0.0046813		14.9748	0.293912	0.234985	0.00106908	0.790311
RA138b - 38		2023-01-04 00:20:49	37.504	110	66767	1510.95	20201.1	1008.35	939030	9504.64	0.0723352	0.00127006	0.294138	0.00810736		13.5439	0.283896	0.303106	0.00185118	0.947387
RA138b - 39		2023-01-04 00:22:11	37.504	110	58704.2	398.152	12628.6	205.145	963475	7024.19	0.0622565	0.000441594	0.21491	0.00284293		15.7348	0.304652	0.215511	0.000648751	0.50698
RA138b - 40		2023-01-04 00:23:33	37.533	110	53766	339.172	11292.7	297.065	885885	6700.5	0.061903	0.000632635	0.210272	0.00546731		15.8228	0.311838	0.210414	0.00124642	0.773126
RA138b - 41		2023-01-04 00:24:58	37.505	110	59582.8	418.647	12824	324.799	974099	11756.8	0.0622621	0.000642265	0.215172	0.00473905		15.7297	0.310199	0.215619	0.00107783	0.832358
RA138b - 42		2023-01-04 00:26:20	27.8685	110	55731.6	394.864	11501	226.653	931332	10315.3	0.0614016	0.000624008	0.206863	0.00373645		15.9483	0.314193	0.206737	0.000848759	0.731387
RA138b - 43		2023-01-04 00:32:09	37.512	110	407193	17681.5	335682	14837	254177	10578.7	1.67661	0.0736863	0.823167	0.00333291		0.583775	0.0169716	0.825871	0.000753337	0.994425
RA138b - 44		2023-01-04 00:33:31	37.536	110	636681	36073.8	513351	29447.9	345225	21509.6	1.97106	0.0704053	0.813769	0.00521441		0.496507	0.0129594	0.807748	0.00117653	0.788482	x
RA138b - 45		2023-01-04 00:34:53	37.504	110	285959	11195.4	235362	9294.94	154404	3346.03	1.95912	0.0833679	0.825829	0.00385233		0.499474	0.0142591	0.824549	0.000868598	0.992063
RA138b - 46		2023-01-04 00:36:17	37.508	110	57156.4	407.8	10108.4	134.858	975610	7088.24	0.0598238	0.000419154	0.176791	0.00187759		16.3548	0.316527	0.177174	0.00042305	0.576359
RA138b - 47		2023-01-04 00:37:39	37.508	110	65305.1	440.569	12054	175.234	1.12601e+06	10097	0.0593609	0.000376795	0.184927	0.00234089		16.4803	0.318018	0.184913	0.000526889	0.595062
RA138b - 48		2023-01-04 00:39:01	37.506	110	63778.3	501.756	12893.2	265.469	1.07534e+06	8288.92	0.0605649	0.00046633	0.201509	0.00310036		16.1507	0.313639	0.202522	0.00069767	0.612815
RA138b - 49		2023-01-04 00:47:42	37.506	110	141898	5710.1	99255.1	4734.06	532337	5351.56	0.270412	0.0105756	0.689243	0.00683358		3.61439	0.0986321	0.700744	0.00153855	0.990933
RA138b - 50		2023-01-04 00:49:04	37.504	110	52762.9	337.164	5743.35	80.2734	1.01351e+06	8920.74	0.0531937	0.000340238	0.10896	0.00143722		18.3715	0.354586	0.109049	0.000323868	0.478776
C_RA138c
RA138c - 1		2023-01-04 00:50:30	37.503	110	53648.3	446.769	9030.76	149.278	946178	9030.48	0.057955	0.000369407	0.167924	0.00213601		16.8598	0.325379	0.168637	0.000481825	0.45238
RA138c - 2		2023-01-04 00:51:53	37.516	110	56982.8	445.148	10597.1	191.724	973606	8558.72	0.0596894	0.000408718	0.185775	0.00283035		16.3678	0.316546	0.186305	0.00063951	-0.0816304
RA138c - 3		2023-01-04 00:53:15	37.503	110	65317.2	1457.03	22744.2	1078.35	835824	7954.07	0.0791648	0.00155956	0.34618	0.00907873		12.3395	0.264457	0.34884	0.00205334	0.972478
RA138c - 4		2023-01-04 00:54:38	37.503	110	685080	13426.8	568610	11376.9	329669	5679.45	2.15735	0.05745	0.82999	0.00294377		0.452739	0.0105167	0.83149	0.000666462	0.992646	x
RA138c - 5		2023-01-04 01:00:28	37.506	110	1.54544e+06	33728.7	1.29234e+06	27852.5	491262	13920.4	3.24261	0.0464997	0.836693	0.00277967		0.301038	0.00612305	0.83774	0.000632451	0.963313	x
RA138c - 6		2023-01-04 01:01:50	37.504	110	848361	29083.7	705213	24519.2	341318	8575.01	2.51076	0.0493621	0.831049	0.00290856		0.388731	0.00832764	0.832766	0.000662036	0.975696	x
RA138c - 7		2023-01-04 01:03:13	37.503	110	54056.9	429.734	7216.1	98.647	981851	9076.83	0.0562939	0.00037551	0.133607	0.00166969		17.3353	0.334989	0.133732	0.000380357	0.45697
RA138c - 8		2023-01-04 01:04:35	37.504	110	56860.7	412.299	7469.85	86.3738	1.04723e+06	9669.31	0.0554259	0.000351904	0.131537	0.00150435		17.6043	0.33971	0.131608	0.000342995	0.404714
RA138c - 9		2023-01-04 01:05:58	37.503	110	57866.4	280.784	7701.9	97.4066	1.05403e+06	5163.25	0.0560209	0.000349513	0.133135	0.00170837		17.4148	0.335898	0.133338	0.000389643	0.355436
RA138c - 10		2023-01-04 01:07:21	37.505	110	59147.9	726.071	8202.53	328.211	1.08447e+06	11802.9	0.055877	0.000602145	0.13922	0.00448085		17.4571	0.345338	0.138929	0.00102215	0.671328
RA138c - 11		2023-01-04 01:15:59	37.51	110	61241.5	552.937	7742.72	243.635	1.09309e+06	5731.38	0.0572737	0.00053985	0.125308	0.00331897		17.0156	0.333658	0.126658	0.000753958	0.29253
RA138c - 12		2023-01-04 01:17:21	37.503	110	58681	422.12	13015.2	257.567	945006	7724.77	0.0636033	0.000482022	0.221089	0.00354453		15.32	0.297325	0.222197	0.000804014	0.565259
RA138c - 13		2023-01-04 01:18:44	34.9359	110	118738	5275.72	79564.8	3996.86	551290	13541.8	0.212679	0.00708351	0.662403	0.00625581		4.58086	0.115853	0.671296	0.00141928	0.984466
RA138c - 14		2023-01-04 01:20:07	37.506	110	69623.6	992.876	26755.1	874.077	827426	8417.58	0.0858381	0.00153249	0.380089	0.00742564		11.3481	0.238576	0.384976	0.00167706	0.959036
RA138c - 15		2023-01-04 01:21:29	37.511	110	77873.7	1001.89	30110.1	794.945	936977	7783.07	0.0847762	0.00106192	0.383291	0.00575118		11.4885	0.230208	0.387351	0.00129796	0.889836
RA138c - 16		2023-01-04 01:22:53	37.526	110	45269.6	595.139	20039.7	475.35	477428	3149.66	0.0963546	0.001396	0.439248	0.00493497		10.1064	0.205827	0.443473	0.00111102	0.918506
RA138c - 17		2023-01-04 01:28:50	37.506	110	48501.2	443.503	11141.4	227.42	775041	8830.64	0.0642243	0.00062509	0.229368	0.00394111		15.1522	0.297685	0.230129	0.000880792	0.700065
RA138c - 18		2023-01-04 01:30:12	14.7775	110	71329.8	3452.55	34976	2691.15	739931	7957.1	0.100995	0.00546159	0.479613	0.0130509		9.63394	0.318561	0.491227	0.00291406	0.984009	x
RA138c - 19		2023-01-04 01:31:36	37.506	110	1218.47	58.2102	273.183	23.9676	17664.4	494.497	0.0691063	0.00269	0.241365	0.0184479		14.0772	0.383225	0.224605	0.00410998	0.49932	x
RA138c - 20		2023-01-04 01:32:58	37.504	110	1276.95	71.4043	420.011	68.5097	17664.1	459.84	0.077496	0.00631848	0.295965	0.031679		12.5512	0.564691	0.329511	0.00704768	0.963261	x
RA138c - 21		2023-01-04 01:34:20	37.505	110	4462.65	69.9674	398.166	19.2144	96554.6	1331.68	0.0473117	0.000765558	0.0892977	0.00443462		20.5553	0.42513	0.089383	0.000985076	0.229666	x
RA138c - 22		2023-01-04 01:35:43	37.505	110	51297.2	1001.56	20590.4	810.489	591954	4524.02	0.0883497	0.00170641	0.393949	0.00882149		11.0057	0.234903	0.402118	0.00195797	0.108284
RA138c - 23		2023-01-04 01:44:21	37.504	110	56129.3	275.518	6735.61	106.263	1.03479e+06	6251.43	0.0553966	0.000388793	0.12023	0.00187138		17.534	0.339369	0.120218	0.000413354	0.524639
RA138c - 24		2023-01-04 01:45:44	37.504	110	50558.9	1754.61	22220	1571.12	546826	5983.96	0.0954792	0.00375193	0.416372	0.0133965		10.1714	0.278246	0.440281	0.00295804	0.986111
RA138c - 25		2023-01-04 01:47:06	37.503	110	111268	2441.13	75516.7	1971.28	484646	6516.86	0.235137	0.00549925	0.676205	0.00462846		4.12948	0.0922493	0.679917	0.00102179	0.974685
RA138c - 26		2023-01-04 01:48:28	37.506	110	31800.5	444.303	4594.01	92.1215	591839	8980.48	0.0549393	0.000413888	0.145295	0.00238859		17.6708	0.342872	0.144724	0.000527314	0.449876
RA138c - 27		2023-01-04 01:49:53	37.505	110	134.884	12.1796	81.1915	8.98419	662.935	48.0951	0.264465	0.0320046	0.843509	0.151406		3.67024	0.232809	0.60302	0.033424	0.533394	x
RA138c - 28		2023-01-04 01:51:15	37.506	110	100.356	10.0495	73.7768	9.15631	412.517	31.6935	0.344275	0.0519044	0.64781	0.341989		2.81891	0.219165	0.736476	0.0586169	0.300333	x
RA138c - 29		2023-01-04 01:57:14	37.507	110	120606	5899.93	70337.7	4903.16	814233	18790	0.151609	0.00843151	0.56946	0.0142372		6.39625	0.215537	0.584257	0.00314236	0.996682	x
RA138c - 30		2023-01-04 01:58:36	37.504	110	58054.5	624.025	7986.45	244.173	1.05501e+06	10609.7	0.0561783	0.000440574	0.137825	0.00336856		17.2586	0.3354	0.137817	0.000743345	0.598568
RA138c - 31		2023-01-04 02:00:00	37.513	110	47001.2	366.242	9015.67	108.995	799544	8255.35	0.0600691	0.000415486	0.192035	0.00219042		16.1377	0.312196	0.192164	0.000483175	0.573022
RA138c - 32		2023-01-04 02:01:22	37.506	110	44403.2	411.729	7779.8	102.28	772532	10299.8	0.0588859	0.000437933	0.175652	0.00239304		16.459	0.319205	0.175524	0.000527574	0.461858
RA138c - 33		2023-01-04 02:02:48	37.512	110	57773.1	412.739	9801.36	118.27	1.01367e+06	9345.11	0.0580854	0.000352797	0.170055	0.00174454		16.6827	0.321556	0.169959	0.000384469	0.397225
RA138c - 34		2023-01-04 02:04:10	37.504	110	56327.8	413.261	10568.5	129.143	971512	11688.6	0.0594077	0.000468694	0.188389	0.0024173		16.3083	0.317011	0.187963	0.000532153	0.681391
RA138c - 35		2023-01-04 02:12:54	37.504	110	71173.8	690.559	25635.4	596.104	897585	10520.8	0.0810691	0.0010576	0.360639	0.00633828		11.9366	0.240173	0.360831	0.00138391	0.914126
RA138c - 36		2023-01-04 02:14:16	37.506	110	49400.2	768.944	17143.8	597.61	660895	8061.5	0.0764856	0.00133957	0.343013	0.00766581		12.6495	0.26503	0.347665	0.00167237	0.931726
RA138c - 37		2023-01-04 02:15:39	37.505	110	96187	2810.4	59416.1	2224.34	578754	6313.47	0.168286	0.00434494	0.614398	0.00609001		5.74804	0.132199	0.618829	0.001329	0.978107
RA138c - 38		2023-01-04 02:17:01	37.506	110	104498	1660.79	62107.4	1185.26	688835	5930.1	0.15263	0.00187677	0.593502	0.00380378		6.33644	0.126744	0.595414	0.000826998	0.95341
RA138c - 39		2023-01-04 02:18:24	37.504	110	67598.4	1251.16	30584.8	1066.99	696240	4182.09	0.099022	0.00181676	0.445382	0.00755033		9.7649	0.206326	0.453266	0.00164173	0.945371
RA138c - 40		2023-01-04 02:19:47	37.504	110	139576	3312.86	96846.1	2542.82	544683	9981.33	0.25979	0.00459012	0.692255	0.00362848		3.72128	0.0780886	0.695111	0.000787357	0.965965
RA138c - 41		2023-01-04 02:25:49	37.51	110	106453	4656.14	58335.6	3734.59	815400	6339.31	0.132207	0.0054027	0.532985	0.00935055		7.30605	0.20402	0.548986	0.00201176	0.991528
RA138c - 42		2023-01-04 02:27:12	37.505	110	73880.3	744.394	25923.3	558.42	964273	11341.1	0.0785554	0.000956923	0.349983	0.0050654		12.2934	0.245682	0.351516	0.00108695	0.939422
RA138c - 43		2023-01-04 02:28:34	37.503	110	287684	77604.3	204210	58469.3	267106	5476.57	1.3527	0.392602	0.614014	0.0200282		0.713775	0.104469	0.711122	0.00429652	0.99895	x
RA138c - 44		2023-01-04 02:29:57	37.506	110	57535.5	571.334	6793.33	99.7405	1.09048e+06	12875.5	0.0539136	0.000327725	0.118358	0.0014849		17.905	0.345124	0.118285	0.000317943	0.279172
RA138c - 45		2023-01-04 02:31:19	37.506	110	50314.8	1133.45	11033.8	473.407	825779	11796.8	0.0616848	0.000608595	0.214723	0.00486718		15.6461	0.307649	0.219692	0.00103936	0.784071
RA138c - 46		2023-01-04 02:32:42	37.503	110	76502.9	882.184	31168.7	563.965	898365	8364.91	0.0867208	0.000848067	0.406858	0.00394932		11.1269	0.218667	0.408154	0.000843474	0.811195
RA138c - 47		2023-01-04 02:41:24	37.504	110	53381.8	516.229	10952	350.805	869447	7685.74	0.0621392	0.00078568	0.207878	0.00568555		15.5081	0.311038	0.205533	0.00120904	0.885442
RA138c - 48		2023-01-04 02:42:47	37.503	110	61308.7	1134.71	16787	764.966	920321	9836.32	0.0679966	0.001008	0.270511	0.00750285		14.1692	0.289425	0.274305	0.00159542	0.937307
RA138c - 49		2023-01-04 02:44:09	37.504	110	30496.2	377.271	7701.56	177.829	489681	3618.56	0.0632375	0.000489406	0.25242	0.00434594		15.2323	0.295863	0.252998	0.000924338	0.505556	x
RA138c - 50		2023-01-04 02:45:32	37.513	110	36061.8	444.639	12340.5	230.6	513654	12161.2	0.0725186	0.00104432	0.338121	0.0060904		13.28	0.270254	0.342822	0.00129568	0.826321	x
C_WC1
WC-1 - 1		2023-01-03 22:44:33	37.521	110	45746.4	320.283	5938.84	100.997	1.02935e+06	7521.97	0.0454266	0.000329142	0.129495	0.00199159		21.6869	0.420201	0.130055	0.000446576	0.409077
WC-1 - 2		2023-01-03 22:45:55	37.506	110	54972.7	416.49	7488.99	125.436	1.25377e+06	11877.9	0.044828	0.000277783	0.135945	0.00185924		21.9755	0.423789	0.136477	0.000417969	0.329266
WC-1 - 3		2023-01-03 22:47:18	37.504	110	51556.8	446.359	4176.89	100.592	1.27324e+06	11082.9	0.041301	0.000276188	0.0811529	0.00195547		23.851	0.460933	0.0811616	0.000441395	0.123955
WC-1 - 4		2023-01-03 22:48:40	37.505	110	39085.1	289.774	4250.43	67.6521	915914	7588.74	0.0436353	0.000320557	0.108565	0.00161718		22.574	0.437602	0.108944	0.000366202	0.349474
WC-1 - 5		2023-01-03 23:15:38	37.504	110	52995	668.954	6044.98	110.511	1.25664e+06	18085.2	0.0431689	0.000280573	0.114269	0.00169366		22.7916	0.440095	0.114273	0.000386747	0.0507609
WC-1 - 6		2023-01-03 23:17:01	37.506	110	38883.6	289.44	4074.24	69.7416	928797	7506.02	0.0427378	0.000316636	0.104889	0.00161481		23.02	0.446386	0.10497	0.000368408	0.299939
WC-1 - 7		2023-01-03 23:44:02	37.504	110	51894.1	298.138	7119.4	99.5764	1.17151e+06	9030.58	0.0452925	0.000304673	0.137421	0.00185997		21.6883	0.419213	0.137439	0.000408688	0.440442
WC-1 - 8		2023-01-03 23:45:25	37.504	110	45826.2	695.208	4775.97	208.464	1.08504e+06	16793.1	0.0430695	0.000342545	0.102909	0.00339239		22.8057	0.443459	0.104407	0.000745552	0.298218
WC-1 - 9		2023-01-04 00:12:15	37.503	110	39363.9	245.387	4445.07	63.4722	980584	8954.9	0.0410696	0.000297624	0.113066	0.00171512		23.8709	0.462521	0.113127	0.000391272	0.343387
WC-1 - 10		2023-01-04 00:13:38	37.513	110	37004.9	284.831	3565.39	67.3464	918677	9340.17	0.0411704	0.000283196	0.0964945	0.00180421		23.8099	0.460539	0.096523	0.0004119	0.108211
WC-1 - 11		2023-01-04 00:40:30	37.504	110	41467.6	383.662	5284.67	188.852	934064	6995.09	0.045401	0.000445332	0.128752	0.00400558		21.5421	0.423426	0.127671	0.000900777	0.698612
WC-1 - 12		2023-01-04 00:41:53	37.503	110	47438.3	286.04	5857.53	81.5024	1.1276e+06	9420.98	0.0428961	0.000317636	0.123602	0.00171958		22.7971	0.442056	0.1237	0.000386594	0.334002
WC-1 - 13		2023-01-04 01:08:48	37.509	110	41533.6	380.985	4138.14	83.3286	999351	9138.3	0.0423777	0.000339103	0.0998851	0.00178839		23.0145	0.447634	0.0998133	0.000407946	0.409472
WC-1 - 14		2023-01-04 01:10:11	37.504	110	47334.7	498.45	5390.82	97.477	1.09527e+06	9088.4	0.0440265	0.000272411	0.114197	0.00214316		22.1494	0.427126	0.114093	0.000488771	-0.0335054
WC-1 - 15		2023-01-04 01:37:09	37.518	110	40665.3	307.445	5577.4	106.817	970114	8160.76	0.0428293	0.000345167	0.139321	0.00275623		22.6989	0.44163	0.137401	0.000610454	0.40068
WC-1 - 16		2023-01-04 01:38:32	37.504	110	46037.7	390.273	5193.92	229.606	1.12784e+06	8637.66	0.0416782	0.00037663	0.111971	0.00402915		23.322	0.456248	0.113023	0.000891825	0.852187
WC-1 - 17		2023-01-04 02:05:39	37.504	110	45106.6	265.22	5020.49	72.799	1.1125e+06	6133.7	0.0413888	0.000286508	0.111382	0.00159474		23.4037	0.452773	0.111504	0.000351039	0.249165
WC-1 - 18		2023-01-04 02:07:02	37.525	110	40341.6	287.378	4657.34	64.2972	992453	9985.25	0.0415854	0.000303346	0.115557	0.0015804		23.2886	0.451342	0.115656	0.00034744	0.372773
WC-1 - 19		2023-01-04 02:34:09	37.504	110	38141.6	237.268	4498	62.9489	950015	6646.62	0.0410356	0.000260252	0.118003	0.00160912		23.5094	0.453647	0.118142	0.000343207	0.360187
WC-1 - 20		2023-01-04 02:35:32	37.514	110	53077.7	435.014	6724.57	105.262	1.31167e+06	12941.3	0.0413155	0.000255472	0.126447	0.00157229		23.3453	0.45018	0.126922	0.000335099	0.417385
WC-1 - 21		2023-01-04 03:02:46	37.506	110	36808.2	274.362	4638.42	90.9723	874908	7366.44	0.0428624	0.000383926	0.126602	0.00237207		22.4062	0.438129	0.126243	0.000512907	0.799705
WC-1 - 22		2023-01-04 03:04:09	37.504	110	38415.9	217.039	4462.39	66.34	954166	6970.91	0.0411312	0.000291635	0.116328	0.00180896		23.3439	0.451972	0.11637	0.000391946	0.295325
WC-1 - 23		2023-01-04 03:31:35	37.504	110	79645.1	1231.24	8709.17	198.401	1.96426e+06	36382.3	0.0415658	0.000287349	0.109145	0.00153286		22.9904	0.444758	0.109547	0.000344528	0.207602
WC-1 - 24		2023-01-04 03:32:59	37.518	110	44927.3	579.522	5199.28	376.777	1.10616e+06	9146.56	0.0415022	0.000414674	0.111586	0.0061066		23.0198	0.453002	0.115936	0.00137346	0.262589
WC-1 - 25		2023-01-04 04:00:40	37.516	110	61565.1	320.445	6932.99	68.99	1.54028e+06	8634.76	0.0407052	0.000264813	0.11305	0.0012122		23.3482	0.450854	0.112816	0.000267365	0.398223
WC-1 - 26		2023-01-04 04:02:03	37.508	110	52780.5	446.366	6794.79	122.717	1.2684e+06	13201.1	0.0425615	0.000299027	0.128601	0.00189146		22.3238	0.43209	0.128969	0.000416808	0.397554
WC-1 - 27		2023-01-04 04:24:09	37.504	110	39211.3	258.442	4330.46	69.1149	944142	7455.1	0.0424226	0.000303546	0.110652	0.00181085		22.2966	0.431827	0.110639	0.000396222	0.210549
WC-1 - 28		2023-01-04 04:25:32	37.503	110	45930.1	322.784	5698.84	81.0086	1.12361e+06	9858.35	0.0417625	0.000287788	0.124311	0.00177962		22.6424	0.437982	0.1243	0.000389511	0.0386069
WC-1 - 29		2023-01-04 04:49:51	37.506	110	46676	294.499	5468.49	77.6161	1.14613e+06	8197.64	0.0416234	0.000273067	0.116878	0.00164414		22.5987	0.436486	0.11737	0.000366819	0.273707
WC-1 - 30		2023-01-04 04:51:13	37.505	110	31022.6	272.211	3442.45	66.9637	743524	8378.37	0.0426913	0.000304687	0.110518	0.00196695		22.0266	0.426561	0.111166	0.000439599	0.380583
C_RA138
RA138 - 1		2023-01-04 12:24:56	37.507	110	62495.7	721.393	16474.6	457.156	1.00166e+06	9975.76	0.0643808	0.000687542	0.262164	0.00472473		14.2822	0.26614	0.263966	0.00105639	0.837255
RA138 - 2		2023-01-04 12:26:18	37.505	110	54502.4	559.01	10669.7	216.702	984259	11082.2	0.0570924	0.000442089	0.19536	0.00277138		16.1051	0.294207	0.196028	0.000620529	0.567431
RA138 - 3		2023-01-04 13:15:36	37.504	110	74692.4	1223.8	28509.6	867.192	965087	11047	0.0798748	0.00123791	0.377946	0.00621647		11.5007	0.223829	0.382206	0.00145036	0.922886
RA138 - 4		2023-01-04 13:16:58	37.504	110	57190.9	493.95	13520.8	297.416	975981	7868.04	0.0603768	0.000535359	0.235802	0.00381051		15.2143	0.279871	0.236733	0.000889062	0.724599
RA138 - 5		2023-01-04 14:04:47	19.6648	110	74825	1048.74	24444.8	782.633	1.0989e+06	9983.65	0.0714952	0.00103138	0.324117	0.00676489		12.8357	0.247151	0.327132	0.00153397	0.788855
RA138 - 6		2023-01-04 14:05:15	10.4126	110	63374.2	782.483	17314.7	509.49	977779	13239.1	0.0652331	0.0010843	0.272903	0.00634205		14.0677	0.277031	0.273581	0.00143753	0.65559
RA138 - 7		2023-01-04 14:06:09	37.506	110	78010	2114.73	21748.4	714.82	1.21446e+06	32365.1	0.0659618	0.000653095	0.27933	0.00386202		13.912	0.257743	0.279165	0.000874814	0.639589
RA138 - 8		2023-01-04 14:55:29	37.506	110	51899.7	760.098	10479.9	288.577	909971	10169.9	0.0585955	0.00066234	0.203487	0.00449361		15.6437	0.292948	0.202196	0.00102107	0.64339
RA138 - 9		2023-01-04 14:56:52	37.505	110	57281.4	708.255	13938.1	433.203	981562	8427.19	0.0600789	0.000586297	0.241137	0.00507107		15.257	0.282373	0.243654	0.00115229	0.732054
RA138 - 10		2023-01-04 15:44:34	37.504	110	59668.1	539.412	13646.7	280.039	1.05942e+06	11630.7	0.0581485	0.000478423	0.227666	0.00364011		15.7455	0.288471	0.229017	0.000803836	0.566604
RA138 - 11		2023-01-04 15:45:57	37.521	110	80968.6	2465.06	35152.4	1669.06	932205	14937.1	0.0901773	0.00262083	0.435163	0.00893481		10.1527	0.23371	0.434731	0.00197085	0.966199
RA138 - 12		2023-01-04 16:35:25	37.505	110	61658.9	1047.6	17545.7	380.497	945077	22333.7	0.0666855	0.000949384	0.285772	0.00532782		13.712	0.263541	0.284942	0.00113642	0.803973
RA138 - 13		2023-01-04 16:36:46	37.506	110	68525.7	875.661	23304.7	603.523	971245	8803.24	0.072761	0.000847057	0.337492	0.00504484		12.5666	0.235974	0.340544	0.00107534	0.857688
RA138 - 14		2023-01-04 17:24:31	37.504	110	58485.4	490.063	9626.08	214.779	1.1291e+06	12528.2	0.0534925	0.000468022	0.16508	0.00342911		17.0709	0.313783	0.16481	0.000713383	0.60037
RA138 - 15		2023-01-04 17:25:53	37.512	110	58526.1	361.293	10919	189.112	1.08655e+06	8657.43	0.0555582	0.000455085	0.186706	0.00317639		16.4356	0.301046	0.186818	0.000659814	0.428284
RA138 - 16		2023-01-04 18:15:06	37.511	110	57542.4	511.715	11085.2	182.459	1.06635e+06	12380.7	0.0556707	0.00044157	0.192598	0.00250482		16.379	0.299542	0.192903	0.0004925	0.507455
RA138 - 17		2023-01-04 18:16:28	37.511	110	57340.7	549.941	13615.1	292.421	990552	9689.84	0.0592777	0.000559957	0.236826	0.00385395		15.3817	0.284057	0.237762	0.000757012	0.736848
RA138 - 18		2023-01-04 19:04:31	37.513	110	72751.2	847.984	21027.4	651.555	1.1541e+06	21089.8	0.0650886	0.00108528	0.288441	0.00836717		13.9879	0.275612	0.289419	0.00168671	0.909714
RA138 - 19		2023-01-04 19:05:53	37.506	110	65155.5	1368.21	20093.2	831.604	1.01391e+06	16182.2	0.0664873	0.0010168	0.305805	0.00732771		13.693	0.265941	0.308802	0.00148176	0.919693
RA138 - 20		2023-01-04 19:55:24	37.583	110	58799.6	769.618	14431.7	521.748	1.00974e+06	10499.4	0.0600781	0.000720778	0.24234	0.00601683		15.1296	0.284947	0.245769	0.00141845	0.85763
RA138 - 21		2023-01-04 19:56:46	37.507	110	52386.9	451.936	7542.71	132.15	1.0534e+06	12647.4	0.051356	0.000396447	0.144011	0.00225969		17.6983	0.323268	0.144174	0.000536539	0.341632
RA138 - 22		2023-01-04 20:44:52	37.506	110	54149.3	454.993	11591.2	266.987	985648	11269.9	0.0567272	0.000540402	0.21377	0.00429117		15.9963	0.295571	0.214347	0.00116668	0.680362
RA138 - 23		2023-01-04 20:46:14	37.516	110	50505.6	509.88	7705.39	220.521	1.01149e+06	10608	0.0515494	0.000522985	0.154606	0.00407306		17.6022	0.32669	0.15277	0.00110832	0.632796
RA138 - 24		2023-01-04 21:38:13	37.504	110	52012.4	464.777	9672.91	191.813	980800	10852.5	0.0546982	0.000469222	0.185698	0.00294879		16.558	0.304022	0.186223	0.000729511	0.51039
RA138 - 25		2023-01-04 21:39:35	37.525	110	55474.9	647.663	12101.7	330.521	1.00554e+06	12239	0.0568521	0.00048792	0.216308	0.00405386		15.9299	0.292496	0.21844	0.00100046	0.577455
RA138 - 26		2023-01-04 22:27:29	37.504	110	59576.3	836.095	15680.9	465.184	989303	14728.8	0.062038	0.00114238	0.265488	0.00548358		14.572	0.292713	0.26356	0.0012003	0.850472
RA138 - 27		2023-01-04 22:28:51	37.504	110	62326.4	1560.15	15344.7	344.269	1.07596e+06	36102.9	0.0597481	0.000897288	0.245325	0.00742661		15.1297	0.29303	0.24653	0.00161861	0.833633
RA138 - 28		2023-01-04 23:18:39	37.51	110	56242.8	501.627	11632.1	243.586	1.04302e+06	11619.2	0.0557419	0.000449401	0.206386	0.003452		16.1854	0.296231	0.207097	0.000682486	0.591193
RA138 - 29		2023-01-04 23:20:02	37.506	110	54197	416.831	9840	156.208	1.04157e+06	10510	0.0537257	0.000435177	0.182021	0.00248734		16.7918	0.307401	0.181804	0.000491212	0.522851
RA138 - 30		2023-01-05 00:08:10	37.504	110	55337.7	446.122	12146.6	267.761	995324	9677.03	0.0572687	0.000534625	0.22002	0.00431092		15.7219	0.290117	0.219794	0.000886653	0.646855
RA138 - 31		2023-01-05 00:09:32	37.511	110	57789.2	525.976	15675.1	356.413	935333	8812.3	0.0636215	0.000804904	0.271975	0.00473124		14.1512	0.26803	0.271611	0.000975828	0.817298
RA138 - 32		2023-01-05 00:58:57	37.504	110	55136	631.108	12460.3	296.141	1.00492e+06	11053.5	0.0567698	0.00056593	0.223988	0.00343763		15.8256	0.293338	0.226295	0.000763706	0.689767
RA138 - 33		2023-01-05 01:00:19	37.504	110	54782.7	375.99	11482.5	250.877	1.01995e+06	11507.3	0.0554259	0.000578334	0.209482	0.00421305		16.2083	0.301469	0.209882	0.000940782	0.0524819
RA138 - 34		2023-01-05 01:48:17	37.504	110	73357.6	885.797	18202.1	437.969	1.28498e+06	15510.1	0.058958	0.000606194	0.248079	0.00465859		15.2047	0.28248	0.248462	0.00112139	0.782135
RA138 - 35		2023-01-05 01:49:39	37.504	110	73081	918.629	25832.1	649.025	1.04135e+06	10832.7	0.0723201	0.000830882	0.351499	0.00531821		12.3947	0.232455	0.353947	0.00128018	0.842531
RA138 - 36		2023-01-05 02:39:07	37.503	110	56445.3	483.646	14997.8	283.347	955510	9212.03	0.0609255	0.000590782	0.26613	0.0041256		14.6791	0.271557	0.266062	0.000923909	0.615704
RA138 - 37		2023-01-05 02:40:29	37.506	110	51932.4	457.152	9826.97	181.559	991081	10930.8	0.0541242	0.000447434	0.187671	0.00267145		16.5226	0.30278	0.18948	0.000597526	0.445999
RA138 - 38		2023-01-05 03:28:25	37.527	110	52343.3	409.265	10860.6	178.885	985609	10159.5	0.0549458	0.000588567	0.207456	0.00316113		16.2379	0.30266	0.207767	0.000697143	0.59278
RA138 - 39		2023-01-05 03:29:47	37.503	110	55944	724.551	15312.1	329.064	927579	13747.2	0.0621902	0.000659294	0.273977	0.00459412		14.3454	0.267159	0.274072	0.00101407	0.657918
RA138 - 40		2023-01-05 04:08:11	37.506	110	50301.1	373.3	10267.5	209.291	948114	7172.67	0.0545147	0.000553087	0.204633	0.00382061		16.334	0.303154	0.204396	0.000880866	0.718906
RA138 - 41		2023-01-05 04:09:33	37.51	110	52433.9	468.984	10097.5	360.818	1.00616e+06	10442.3	0.0539505	0.000650696	0.193491	0.00613241		16.5037	0.310995	0.192834	0.0014179	0.800543
C_WC1
WC-1 - 1		2023-01-04 12:27:45	37.505	110	36319.4	328.384	4273.94	68.6564	952481	9993.98	0.0393552	0.000284062	0.117491	0.0018214		23.3629	0.425535	0.117835	0.000408771	0.181554
WC-1 - 2		2023-01-04 12:29:11	35.2778	110	43100.5	480.74	5222.68	359.356	1.07218e+06	7262.62	0.041117	0.000547936	0.123362	0.0077416		22.3613	0.426114	0.121337	0.00174059	0.869713
WC-1 - 3		2023-01-04 13:18:24	37.516	110	45163.6	324.003	4632.12	78.5428	1.20361e+06	11510.2	0.0387568	0.000343337	0.102956	0.00173253		23.7008	0.435958	0.102701	0.000404189	0.46494
WC-1 - 4		2023-01-04 13:19:47	37.505	110	43751.6	292.347	4676.81	69.3663	1.14654e+06	10402.9	0.0394171	0.000294052	0.107294	0.00171826		23.3031	0.425014	0.107038	0.000400794	0.342425
WC-1 - 5		2023-01-04 14:07:36	37.504	110	45011.4	463.066	5534.68	94.4197	1.13141e+06	16318.9	0.0410202	0.000394871	0.123227	0.00182931		22.3703	0.413635	0.123127	0.000414225	0.585463
WC-1 - 6		2023-01-04 14:08:59	37.504	110	44323.6	388.797	5182.16	101.491	1.10984e+06	11256.3	0.0412328	0.000326969	0.116196	0.00194165		22.2543	0.406985	0.117073	0.000439489	0.320633
WC-1 - 7		2023-01-04 14:58:18	37.517	110	40606.3	296.622	4680.06	81.4259	1.0627e+06	8868.82	0.0394276	0.000314073	0.115266	0.00193279		23.2475	0.42524	0.115409	0.000439101	0.411166
WC-1 - 8		2023-01-04 14:59:41	37.503	110	36199.2	298.583	3661.79	65.6634	951624	8559.59	0.0391651	0.000320572	0.1015	0.00189171		23.4026	0.428642	0.101292	0.000429689	-0.031636
WC-1 - 9		2023-01-04 15:47:24	37.505	110	41563.4	298.462	5132.59	80.42	1.06878e+06	9725.45	0.0402026	0.000340695	0.123563	0.00182854		22.7725	0.417851	0.123654	0.000402781	0.409313
WC-1 - 10		2023-01-04 15:48:47	37.505	110	37673.2	270.585	4213.57	72.6805	1.00392e+06	9585.45	0.0387475	0.000340607	0.111963	0.00186582		23.6269	0.434405	0.111996	0.000410436	0.014168
WC-1 - 11		2023-01-04 16:38:13	37.504	110	35019.8	273.819	4322.48	77.8853	872454	8141.07	0.0414215	0.000351724	0.123655	0.00227492		22.0736	0.405069	0.123595	0.000484515	0.3255
WC-1 - 12		2023-01-04 16:39:36	37.503	110	37907.9	309.894	4708.31	101.824	950782	6585.68	0.0410117	0.000368025	0.124545	0.00245458		22.2933	0.410379	0.124371	0.000522423	0.493725
WC-1 - 13		2023-01-04 17:27:19	37.504	110	47138.9	294.231	5584.14	71.5449	1.19954e+06	10900.1	0.0404776	0.000295666	0.11871	0.00158045		22.558	0.411068	0.118621	0.000328053	0.277345
WC-1 - 14		2023-01-04 17:28:45	14.859	110	42385.1	343.096	4977.42	107.608	1.07367e+06	9545.97	0.0412401	0.000441106	0.117522	0.00254852		22.14	0.412619	0.117591	0.000528256	0.304482
WC-1 - 14b		2023-01-04 17:29:10	10.3276	110	39914.5	417.904	4803.52	140.094	944527	10236.7	0.0425047	0.000596475	0.120457	0.00356907		21.481	0.412056	0.120507	0.000739623	0.286598
WC-1 - 15		2023-01-04 18:17:55	37.506	110	37888.8	312.812	4896.91	65.1931	954604	11072.8	0.0410422	0.000307116	0.129293	0.00160479		22.215	0.40522	0.129418	0.000314941	0.390485
WC-1 - 16		2023-01-04 18:19:18	37.51	110	34362.4	267.425	4895.05	83.6139	820560	4934.73	0.0430125	0.000379723	0.142836	0.00221632		21.1966	0.389817	0.142645	0.00043448	0.464047
WC-1 - 17		2023-01-04 19:07:19	37.513	110	54676.7	424.071	6216.34	98.2482	1.41167e+06	13819	0.0399666	0.00028091	0.113527	0.00154244		22.7783	0.414464	0.113845	0.000312905	0.362169
WC-1 - 18		2023-01-04 19:08:42	37.504	110	46565.3	320.138	7080.8	82.7647	1.08474e+06	11812.4	0.0443464	0.000365556	0.152183	0.00186467		20.5278	0.376121	0.152266	0.000379281	0.416793
WC-1 - 19		2023-01-04 19:58:12	37.511	110	37381	292.814	4523.08	73.1775	926735	9262.18	0.0416599	0.000354736	0.120699	0.00183711		21.8165	0.400411	0.121162	0.000438303	0.431264
WC-1 - 20		2023-01-04 19:59:37	14.1106	110	36563.7	380.451	3340.27	87.9539	1.00292e+06	12392.7	0.0382794	0.000511082	0.0920424	0.00274573		23.7419	0.452528	0.0914772	0.000659503	0.485472
WC-1 - 20b		2023-01-04 20:00:00	9.86043	110	36180.3	437.347	3162.76	101.908	937480	9805.85	0.0389766	0.000618886	0.0876954	0.00325752		23.317	0.455582	0.0875341	0.000782851	0.07203
WC-1 - 21		2023-01-04 20:47:40	37.52	110	38150.9	349.806	3154.49	84.5171	1.04141e+06	10990.3	0.0377417	0.000292165	0.0826376	0.00197561		24.0407	0.439169	0.0827957	0.000537863	0.299457
WC-1 - 22		2023-01-04 20:51:20	37.512	110	34666.4	315.168	3064.2	54.1894	927199	8218.9	0.038337	0.000306759	0.0889331	0.00159993		23.6644	0.432958	0.0885099	0.000435749	0.33691
WC-1 - 23		2023-01-04 21:41:02	37.504	110	37258.9	347.791	4398.88	67.2764	977965	10603	0.039291	0.000316977	0.118454	0.00181363		23.0486	0.421858	0.118221	0.000444956	0.198975
WC-1 - 24		2023-01-04 21:42:25	37.504	110	26430.9	197.137	2691.58	51.0623	715030	6658.97	0.0382429	0.000318124	0.101933	0.00203999		23.679	0.434061	0.101971	0.000498338	0.191069
WC-1 - 25		2023-01-04 22:30:18	37.563	110	43655.9	326.84	5767.16	80.367	1.12086e+06	13909.7	0.0402589	0.000294746	0.132495	0.00191947		22.4527	0.409187	0.132282	0.00041647	0.373825
WC-1 - 26		2023-01-04 22:31:40	37.504	110	39993	330.91	4190.91	60.6122	1.04451e+06	11380.9	0.0396132	0.000272958	0.104433	0.00140526		22.8175	0.414876	0.104932	0.000304216	0.397933
WC-1 - 27		2023-01-04 23:21:28	37.624	110	38971.8	259.259	5275.97	82.4303	1.01449e+06	7952.16	0.0395774	0.00031319	0.135417	0.00207808		22.7934	0.416803	0.135561	0.00041	0.138057
WC-1 - 28		2023-01-04 23:22:51	37.505	110	43884.8	437.005	6480.54	118.184	1.09867e+06	13125.6	0.0412232	0.000306618	0.147572	0.0021041		21.8821	0.399047	0.14787	0.00041494	0.375647
WC-1 - 29		2023-01-05 00:10:58	37.504	110	41271.1	340.601	4899.51	81.1052	1.09696e+06	10468.1	0.0388192	0.000301243	0.119027	0.00184889		23.1912	0.423697	0.118875	0.000381296	0.281824
WC-1 - 30		2023-01-05 00:12:21	37.52	110	31772.1	264.824	3753.37	59.9154	831732	7691.89	0.039468	0.000333079	0.118054	0.00184723		22.8086	0.418421	0.118293	0.000382046	0.322026
WC-1 - 31		2023-01-05 01:01:45	37.504	110	32524.5	414.89	3842.87	68.3934	877292	14964.9	0.0383958	0.000327143	0.11829	0.00191782		23.3959	0.429414	0.118312	0.000429086	0.338427
WC-1 - 32		2023-01-05 01:03:08	37.504	110	32700	210.491	4064.97	61.9719	868953	6262.81	0.0388091	0.000307151	0.124344	0.00193062		23.1453	0.423242	0.124478	0.000433094	0.339762
WC-1 - 33		2023-01-05 01:51:05	37.504	110	34705.3	306.769	3503.47	77.3318	926461	9497.86	0.0387066	0.000388419	0.100875	0.00201475		23.1569	0.429436	0.101085	0.000485012	0.651792
WC-1 - 34		2023-01-05 01:52:28	37.528	110	36918.4	297.849	3025.24	86.253	1.01325e+06	9843.48	0.0376101	0.000324942	0.0818002	0.00216816		23.8305	0.437724	0.082054	0.000521849	0.0565897
WC-1 - 35		2023-01-05 02:41:55	37.506	110	39150.9	250.239	4273.06	66.0438	1.03866e+06	9302.47	0.0389025	0.000284333	0.109351	0.00180874		22.9859	0.418876	0.10929	0.000403257	0.215691
WC-1 - 36		2023-01-05 02:43:18	37.512	110	43893.6	331.888	6016.34	83.7764	1.09813e+06	9993.25	0.0413054	0.000321999	0.137023	0.00186681		21.6473	0.395572	0.13725	0.000415535	0.303231
WC-1 - 37		2023-01-05 03:31:14	37.519	110	34937.2	255.741	4321.8	60.9804	944758	8059.45	0.0381215	0.000358257	0.123996	0.00192478		23.401	0.432006	0.123868	0.000425347	-0.0333969
WC-1 - 38		2023-01-05 03:32:36	37.504	110	33727.9	237.547	3677.23	58.9904	917603	9438.22	0.0379739	0.000306096	0.109326	0.00178043		23.4905	0.429928	0.109173	0.000393901	0.292522
WC-1 - 39		2023-01-05 04:11:00	37.506	110	29608.2	261.003	2996.94	59.0305	823124	8792.95	0.0371964	0.000317492	0.1014	0.00195537		23.9355	0.43936	0.101356	0.000452706	0.217217
WC-1 - 40		2023-01-05 04:12:23	37.504	110	30060.8	220.067	3503.18	56.4287	783041	6896.14	0.0396529	0.00036777	0.116559	0.00191815		22.4511	0.414121	0.116693	0.000444933	0.331708
C_RA138
RA138 - 1		2023-01-30 14:14:42	36.507	110	129512	825.429	31562.8	525.896	1.75432e+06	13046	0.0774618	0.00050396	0.00312004	0.00312004		15.7372	0.412224	0.243749	0.00155972	-0.516968	x
RA138 - 2		2023-01-30 14:16:04	36.504	110	141800	1331.06	34497.1	1088.84	1.89886e+06	15258.6	0.0784168	0.000834215	0.00593003	0.00593003		15.5626	0.412879	0.243323	0.00296447	-0.834932	x
RA138 - 3		2023-01-30 14:39:05	36.506	110	141518	1452.89	34082.6	565.942	1.93725e+06	27254.9	0.0764963	0.000662474	0.00415492	0.00415492		16.1845	0.426457	0.240878	0.00207738	-0.747754	x
RA138 - 4		2023-01-30 14:40:29	36.506	110	132333	978.516	28435.5	336.372	1.92222e+06	21491.5	0.0724366	0.000414278	0.0022779	0.0022779		17.1025	0.447201	0.214916	0.00113892	-0.212918	x
RA138 - 5		2023-01-30 15:20:26	36.505	110	124952	855.991	27967.6	634.733	1.63769e+06	21181.4	0.080355	0.000767655	0.00470909	0.00470909		15.5619	0.411251	0.223866	0.00235478	-0.721001
RA138 - 6		2023-01-30 15:21:49	36.506	110	126183	663.649	24805.7	253.547	1.73232e+06	14587.9	0.0765543	0.000422871	0.00193173	0.00193173		16.3353	0.426971	0.196619	0.000965964	0.00671282
RA138 - 7		2023-01-30 16:00:00	36.506	110	141962	2397.06	40605.6	1772.03	1.66395e+06	13727.5	0.0893533	0.0013633	0.00757814	0.00757814		13.9394	0.37759	0.286081	0.00378946	-0.867074
RA138 - 8		2023-01-30 16:01:25	36.506	110	139334	1233.61	39067.1	796.032	1.64529e+06	20725.6	0.0885937	0.000853371	0.0044044	0.0044044		14.0544	0.371515	0.280433	0.00220242	-0.722816
RA138 - 9		2023-01-30 16:39:47	36.506	110	140704	2397.64	37948.4	1367.89	1.62801e+06	21235.6	0.088658	0.00129519	0.00633946	0.00633946		13.8771	0.37466	0.269751	0.00316999	-0.909742
RA138 - 10		2023-01-30 16:41:08	36.507	110	131208	701.147	30031.2	448.677	1.66847e+06	13007.5	0.0826946	0.000541038	0.0029257	0.0029257		14.8701	0.389546	0.228922	0.00146297	-0.451907
RA138 - 11		2023-01-30 17:20:59	36.508	110	124877	1118.22	28253.1	597.576	1.68434e+06	18683.6	0.0781811	0.000606751	0.00361825	0.00361825		15.4667	0.406458	0.226287	0.00180941	-0.577002
RA138 - 12		2023-01-30 17:22:22	36.506	110	137445	1731.44	29855	675.399	1.84134e+06	35675.2	0.077982	0.000979545	0.00304365	0.00304365		15.4966	0.414373	0.217252	0.00152207	0.307467
RA138 - 13		2023-01-30 18:00:28	36.504	110	153684	1256.55	49082.8	990.736	1.71368e+06	15850.2	0.0937445	0.000975046	0.00488844	0.00488844		12.6725	0.335906	0.319431	0.00244432	-0.556019
RA138 - 14		2023-01-30 18:01:51	36.504	110	135179	1294.29	30622.3	618.704	1.78979e+06	18305.3	0.0792634	0.00045868	0.00293165	0.00293165		14.9786	0.391721	0.226571	0.00146589	-0.398356
RA138 - 15		2023-01-30 18:40:17	36.505	110	149851	821.681	39585	424.805	1.88103e+06	14960.3	0.0836215	0.000486171	0.0023107	0.0023107		13.9735	0.365457	0.26421	0.00115518	-0.294763
RA138 - 16		2023-01-30 18:41:39	36.504	110	99026.4	1604.13	32174.5	945.577	1.10043e+06	18504	0.0944727	0.00103983	0.00528213	0.00528213		12.3619	0.328429	0.324965	0.00264066	-0.47841
RA138 - 17		2023-01-30 19:21:26	36.504	110	127252	1357.09	27707.4	754.236	1.80952e+06	14481.8	0.0737029	0.000594165	0.00417668	0.00417668		15.6335	0.411196	0.217774	0.00208784	-0.529134
RA138 - 18		2023-01-30 19:22:49	36.503	110	132552	701.154	30796.6	365.938	1.85388e+06	12059.5	0.0750687	0.000497731	0.00233997	0.00233997		15.3429	0.402018	0.232376	0.00116971	-0.237955
RA138 - 19		2023-01-30 20:00:54	36.506	110	152384	1642.01	42851.5	858.701	1.95697e+06	19135.8	0.0817829	0.000615815	0.00332716	0.00332716		13.952	0.366418	0.281257	0.00166363	-0.570691
RA138 - 20		2023-01-30 20:02:18	36.505	110	143020	929.205	32243	579.857	2.02295e+06	16549.7	0.0744136	0.000427919	0.00309968	0.00309968		15.3294	0.400865	0.225484	0.00154992	-0.482975
RA138 - 21		2023-01-30 20:40:41	36.51	110	146363	1185.01	35486.4	812.816	2.02295e+06	21966.6	0.0760771	0.000646831	0.00410764	0.00410764		14.9004	0.392431	0.242496	0.00205428	-0.772821
RA138 - 22		2023-01-30 20:42:03	36.504	110	148253	1593.58	35737.2	1002.43	2.02622e+06	17049.5	0.0768662	0.000754942	0.00448419	0.00448419		14.7448	0.39002	0.241097	0.0022426	-0.72467
RA138 - 23		2023-01-30 21:21:58	36.504	110	181248	19462.1	40434.3	1441.02	2.83426e+06	421805	0.0738621	0.00110176	0.00918943	0.00918943		15.2742	0.413021	0.223127	0.00459488	-0.693634
RA138 - 24		2023-01-30 21:23:20	36.504	110	176048	4337.85	61415.2	2295.16	2.00902e+06	30385.8	0.0892043	0.00173481	0.00847771	0.00847771		12.6453	0.350918	0.348917	0.00423898	-0.8838
RA138 - 25		2023-01-30 22:01:18	36.52	110	142649	1060.65	29623.6	553.431	2.06348e+06	19188.7	0.0727574	0.000440523	0.00312952	0.00312952		15.4276	0.403697	0.207704	0.00156461	-0.416232
RA138 - 26		2023-01-30 22:02:42	36.503	110	147019	1495.87	35329	906.738	1.97805e+06	22997.1	0.077488	0.000820809	0.00584148	0.00584148		14.4824	0.384156	0.240344	0.00292046	-0.718007
RA138 - 27		2023-01-30 22:40:48	36.503	110	159021	1814.59	50026.1	1114.74	1.84997e+06	19399	0.0902666	0.000852507	0.00401961	0.00401961		12.3227	0.32553	0.314643	0.00200967	-0.582609
RA138 - 28		2023-01-30 22:42:11	36.508	110	149578	1136.19	37054.9	665.682	1.95968e+06	19156.5	0.0803393	0.000597391	0.00343484	0.00343484		13.8393	0.363367	0.247774	0.00171732	-0.576268	x
RA138 - 29		2023-01-30 23:07:59	36.506	110	115049	1142.91	23843.3	698.482	1.89197e+06	14426.6	0.0637203	0.000520474	0.00435438	0.00435438		17.2676	0.454319	0.207281	0.00217724	-0.605192	x
RA138 - 30		2023-01-30 23:09:20	36.52	110	109069	538.427	22637.7	322.683	1.78459e+06	12855.9	0.064203	0.00039083	0.00277751	0.00277751		17.1261	0.448175	0.20759	0.0013888	-0.45981	x
C_WC1
WC-1 - 1		2023-01-30 14:17:38	36.504	110	116982	1276.14	14244.3	240.685	2.38541e+06	33657.9	0.0516514	0.000344903	0.00178641	0.00178641		23.6556	0.619899	0.121787	0.000893046	0.281128
WC-1 - 2		2023-01-30 14:18:59	37.9781	110	96687	876.476	7613.65	311.767	2.01314e+06	20639.3	0.0507285	0.000372757	0.00267361	0.00267361		24.1109	0.63291	0.0787591	0.00133658	-0.225639
WC-1 - 3		2023-01-30 14:42:01	36.515	110	87526.2	722.324	6613.04	191.259	1.91044e+06	17173.4	0.0481464	0.000270745	0.00206105	0.00206105		25.7482	0.67314	0.0755683	0.0010305	-0.0812194	x
WC-1 - 4		2023-01-30 14:43:24	36.506	110	109971	503.034	14638.7	127.034	2.24233e+06	16644.8	0.0514841	0.000222663	0.00117741	0.00117741		24.0932	0.628382	0.133138	0.000588697	0.169458	x
WC-1 - 5		2023-01-30 15:23:21	36.506	110	93202.2	873.89	7253.05	163.172	1.92205e+06	19002.5	0.0509573	0.000299346	0.00173297	0.00173297		24.5419	0.641942	0.0778342	0.000866574	0.0878099
WC-1 - 6		2023-01-30 15:24:45	35.0655	110	94333.1	624.027	10595.8	156.071	1.83639e+06	18705.7	0.0537598	0.000355677	0.00172614	0.00172614		23.263	0.609518	0.112343	0.000863157	0.100031
WC-1 - 7		2023-01-30 16:02:56	36.529	110	106943	1171.29	12823.1	231.118	2.0493e+06	31768.7	0.0550151	0.000321697	0.00178189	0.00178189		22.6245	0.591755	0.119927	0.000891033	-0.273562
WC-1 - 8		2023-01-30 16:04:19	36.506	110	92676.8	486.983	10521.5	181.659	1.79627e+06	13461.6	0.0543185	0.000288533	0.00175792	0.00175792		22.907	0.598489	0.113548	0.000879046	0.0548118
WC-1 - 9		2023-01-30 16:42:39	36.509	110	92753.1	773.62	8516.45	240.979	1.82665e+06	13492.2	0.0536736	0.000354494	0.00275898	0.00275898		22.897	0.599913	0.0918346	0.00135429	0.0385079
WC-1 - 10		2023-01-30 16:44:02	36.504	110	94447.5	897.152	8142.1	219.306	1.84171e+06	21879.1	0.0539149	0.000320949	0.00168943	0.00168943		22.7822	0.596014	0.0862227	0.00084479	-0.06845
WC-1 - 11		2023-01-30 17:23:54	36.505	110	103091	1266.43	12416.6	368.118	1.97351e+06	27063	0.0549151	0.000318872	0.00219294	0.00219294		21.9907	0.575128	0.120464	0.00109664	-0.335144
WC-1 - 12		2023-01-30 17:25:17	36.504	110	127801	895.992	14689.5	245.952	2.48914e+06	23881.9	0.0540582	0.00029152	0.00175017	0.00175017		22.3254	0.583387	0.11496	0.000875222	-0.205236
WC-1 - 13		2023-01-30 18:03:22	36.504	110	87582.5	534.405	8889.67	112.415	1.74322e+06	16830.4	0.052879	0.000290555	0.00124046	0.00124046		22.4371	0.586425	0.101518	0.000620247	0.11004
WC-1 - 14		2023-01-30 18:04:46	36.504	110	111943	623.503	13745.1	169.158	2.12536e+06	20187.4	0.0554277	0.000319277	0.00134248	0.00134248		21.3925	0.559427	0.122808	0.000671258	0.0558595
WC-1 - 15		2023-01-30 18:43:11	36.533		90906	610.645	11966.3	138.168	1.76115e+06	15757.5	0.0542424	0.000305091	0.00161295	0.00161295		21.518	0.56255	0.131657	0.000806343	0.0900323
WC-1 - 16		2023-01-30 18:44:34	36.506		106830	646.357	13256.8	196.109	2.06834e+06	18126.8	0.054287	0.000289245	0.00143646	0.00143646		21.4891	0.561461	0.124113	0.000718113	0.401629
WC-1 - 17		2023-01-30 19:24:21	36.505	110	130806	775.163	13813.1	184.241	2.75664e+06	23020.2	0.0498462	0.000249294	0.00129827	0.00129827		23.0964	0.603082	0.105618	0.000648989	-0.149585
WC-1 - 18		2023-01-30 19:25:43	36.505	110	132424	1016.48	16585.2	162.624	2.72104e+06	28817.8	0.0511758	0.000229544	0.001148	0.001148		22.4875	0.586657	0.125265	0.00057387	0.0532898
WC-1 - 19		2023-01-30 20:03:50	36.506	110	98116.2	1302.83	12003	126.671	2.00069e+06	33482.6	0.0516597	0.000267282	0.00166086	0.00166086		22.0746	0.576588	0.122356	0.000830495	0.0285132
WC-1 - 20		2023-01-30 20:05:13	36.505	110	145434	1492.2	19096.6	482.456	2.95044e+06	19898	0.0517112	0.000355726	0.0023643	0.0023643		22.0467	0.578023	0.131331	0.00118226	-0.443254
WC-1 - 21		2023-01-30 20:43:36	36.506	110	125405	1156.23	13052.5	243.236	2.64211e+06	29410.6	0.0500598	0.000247069	0.00168953	0.00168953		22.6359	0.590989	0.104101	0.00084495	-0.453823
WC-1 - 22		2023-01-30 20:44:59	36.503	110	83667.9	487.361	9815.79	100.444	1.76799e+06	9422.01	0.049654	0.000271847	0.00125868	0.00125868		22.8169	0.596326	0.117339	0.000629478	0.150015
WC-1 - 23		2023-01-30 21:24:52	36.504	110	105643	881.489	11382.5	119.558	2.35862e+06	24203.2	0.0471043	0.000231504	0.000992703	0.000992703		23.9431	0.625092	0.107764	0.000496361	0.290459
WC-1 - 24		2023-01-30 21:26:16	36.504	110	62674.7	696.626	5982.7	189.437	1.36102e+06	7959.49	0.0482543	0.000316093	0.00244266	0.00244266		23.3688	0.612196	0.0954731	0.00122135	-0.19505
WC-1 - 25		2023-01-30 22:04:14	36.52	110	87393.4	591.29	10423.5	250.792	1.78721e+06	11889.7	0.0513397	0.000322021	0.00241346	0.00241346		21.853	0.572112	0.119292	0.00120661	-0.522024
WC-1 - 26		2023-01-30 22:05:35	36.51	110	96737.5	626.759	8775.22	158.841	2.01863e+06	18358.4	0.0503906	0.000248978	0.00126185	0.00126185		22.2593	0.581162	0.0907275	0.000630861	-0.0986135	x
WC-1 - 27		2023-01-30 22:43:45	18.331	110	102263	644.094	10571.4	192.183	2.11168e+06	18576.5	0.051758	0.000375374	0.00171796	0.00171796		21.4705	0.563457	0.103393	0.000858932	0.0490472	x
WC-1 - 28		2023-01-30 22:45:08	11.8101	110	111738	756.601	13266.3	226.792	2.28273e+06	15276.3	0.0528785	0.000437467	0.002299	0.002299		21.0058	0.552845	0.118747	0.00109154	0.13247	x
WC-1 - 29		2023-01-30 23:10:56	25.3127	110	90954.4	478.256	6899.79	128.46	2.17576e+06	10496.6	0.0438838	0.000222689	0.00140713	0.00140713		25.0353	0.6538	0.0758731	0.00070359	0.0704885
WC-1 - 30		2023-01-30 23:12:16	17.6827	110	78537.5	658.014	7997.23	429.04	1.89611e+06	10633.4	0.0444901	0.000353721	0.00506986	0.00506986		24.6769	0.64885	0.101845	0.00253503	-0.44795
C_RA138
RA138 - 1		2023-02-02 14:00:04	36.506	110	99903.4	1547.06	20275.4	498.893	1.46057e+06	20450.9	0.0772868	0.000670287	0.203759	0.00734445		15.0484	0.308672	0.202999	0.0029502	0.534372	x
RA138 - 2		2023-02-02 14:01:31	36.506	111	115157	1614.4	28875.9	639.167	1.56865e+06	28255.1	0.0826591	0.000886784	0.248599	0.00484612		14.093	0.292481	0.250815	0.00242306	0.876964	x
RA138 - 3		2023-02-02 14:11:55	36.504	112	108338	1027.98	24295.9	538.974	1.55635e+06	12757.8	0.0785301	0.000642906	0.223167	0.00323377		14.9823	0.306568	0.224314	0.00161688	0.793522
RA138 - 4		2023-02-02 14:13:18	38.5255	113	108715	1149.41	23931.4	653.211	1.5704e+06	20542.9	0.0781767	0.000637153	0.22083	0.00381982		15.067	0.308245	0.220183	0.0019099	0.642031
RA138 - 5		2023-02-02 14:51:18	36.506	114	110971	883.788	22071.2	447.119	1.6762e+06	12493.4	0.074684	0.000485114	0.198153	0.00274434		16.0582	0.326137	0.19894	0.0013721	0.719975
RA138 - 6		2023-02-02 14:52:39	38.6932	110	120743	1169.89	20750.1	525.34	1.91831e+06	15962	0.0711215	0.000414741	0.171291	0.0031386		16.8679	0.34173	0.171895	0.00156922	0.624657
RA138 - 7		2023-02-02 15:30:46	35.7057	110	109262	1919.82	30470	1034.28	1.40114e+06	14357.8	0.0875972	0.00112572	0.280924	0.00565092		13.7659	0.289813	0.27894	0.0028252	0.896174
RA138 - 8		2023-02-02 15:32:06	37.3278	110	100950	951.446	19545.1	453.791	1.51918e+06	13958.3	0.075036	0.000495869	0.193009	0.00337337		16.0723	0.32657	0.193659	0.00168653	0.250265
RA138 - 9		2023-02-02 16:10:20	36.504	110	98625.5	734.809	18902.2	336.849	1.44508e+06	16597.9	0.0771656	0.000591428	0.19205	0.00315975		15.6941	0.320338	0.191703	0.00157977	0.70978
RA138 - 10		2023-02-02 16:11:42	36.504	110	113342	937.932	25187.1	474.573	1.58139e+06	17202.3	0.0811591	0.000565038	0.221128	0.00297786		14.925	0.303698	0.222277	0.00148883	0.738976
RA138 - 11		2023-02-02 16:49:55	36.504	110	105577	889.136	23515	470.021	1.48502e+06	14038.8	0.0802266	0.000544373	0.222164	0.00317359		15.2189	0.309451	0.222783	0.00158684	0.644701
RA138 - 12		2023-02-02 16:51:17	36.506	110	108739	739.742	24299.7	460.855	1.53461e+06	14529.5	0.0799166	0.000689267	0.222312	0.00326938		15.2834	0.313415	0.223522	0.00163475	0.769092
RA138 - 13		2023-02-02 17:29:28	36.505	110	107166	1178.59	26943.6	794.723	1.44743e+06	11262.5	0.0836615	0.000939388	0.252424	0.00544612		14.7641	0.307383	0.25148	0.00272337	0.850256
RA138 - 14		2023-02-02 17:30:50	36.506	110	122535	1701.13	33752.3	1269.79	1.57353e+06	14783.5	0.0874384	0.00116977	0.273481	0.00625554		14.1323	0.298685	0.275518	0.00312815	0.964702
RA138 - 15		2023-02-02 18:09:04	36.503	110	102194	797.527	23782.9	464.513	1.40586e+06	10100.1	0.0820126	0.000672623	0.233291	0.003486		15.2317	0.311693	0.232778	0.00174331	0.764376
RA138 - 16		2023-02-02 18:10:25	37.7893	110	94305.3	471.645	19449.9	322.129	1.38618e+06	9444.54	0.0767595	0.000433481	0.204736	0.00275027		16.2793	0.329594	0.206294	0.00137538	0.654547
RA138 - 17		2023-02-02 18:48:30	36.508	110	118509	1039.02	27466.9	567.721	1.65075e+06	15103.5	0.0809861	0.000702012	0.230602	0.00336383		15.5151	0.318239	0.231828	0.00168209	0.722498
RA138 - 18		2023-02-02 18:49:53	36.504	110	97617.5	610.977	18408.7	358.521	1.47998e+06	12335	0.0744487	0.000565296	0.187966	0.00310058		16.8783	0.344396	0.188626	0.00155044	0.679805
RA138 - 19		2023-02-02 19:28:00	36.504	110	111462	811.868	26462.5	661.083	1.55611e+06	11531.2	0.0809103	0.000752603	0.237833	0.00482634		15.4649	0.31828	0.23747	0.00241318	0.836492
RA138 - 20		2023-02-02 19:29:23	36.506	110	104063	770.086	19336.9	344.663	1.58526e+06	13916.5	0.0741243	0.000424932	0.185425	0.00244347		16.8745	0.341747	0.185864	0.00122174	0.513471
RA138 - 21		2023-02-02 20:07:28	36.504	110	119130	913.911	29862.1	825.411	1.65379e+06	17280	0.0817067	0.00100698	0.252566	0.00608953		15.0578	0.315822	0.250729	0.00304479	0.908176
RA138 - 22		2023-02-02 20:08:50	36.504	110	102930	1073.54	22616.3	633.75	1.48544e+06	12631.7	0.07773	0.000606887	0.218137	0.00403286		15.8153	0.323025	0.219779	0.00201645	0.798109
RA138 - 23		2023-02-02 20:46:55	36.504	110	112470	1748.3	30241.2	955.776	1.47939e+06	24500.3	0.0858773	0.000866113	0.265469	0.00490254		13.9217	0.287801	0.268949	0.0024512	0.800824
RA138 - 24		2023-02-02 20:48:17	36.505	110	102322	655.921	20684.3	541.559	1.4886e+06	11964.4	0.0778077	0.000687357	0.202409	0.00447154		15.3479	0.315081	0.202199	0.00223569	0.813088
RA138 - 25		2023-02-02 21:26:27	36.506	110	99105.3	672.475	20770.1	438.176	1.44089e+06	10495.9	0.0774907	0.000573561	0.209155	0.00374358		14.9194	0.304164	0.209628	0.00187143	0.31729	x
RA138 - 26		2023-02-02 21:27:49	36.504	110	108564	692.689	18530.1	340.471	1.67669e+06	11803.6	0.0729656	0.000450575	0.169906	0.00259715		15.8276	0.321059	0.170725	0.00129832	0.481636	x
RA138 - 27		2023-02-02 22:12:09	36.518	110	113975	1263.6	30220.8	681.579	1.609e+06	16488.4	0.0792605	0.000662409	0.264566	0.00444618		14.26	0.292035	0.265217	0.00222281	0.754117
RA138 - 28		2023-02-02 22:13:31	36.506	110	99525.4	657.37	18029.2	494.491	1.64322e+06	14104.5	0.0684342	0.000528797	0.181661	0.00423728		16.5158	0.337206	0.181196	0.00211839	0.816967
RA138 - 29		2023-02-02 22:46:09	36.504	110	100023	724.097	18678.9	337.296	1.59988e+06	12295.4	0.0705307	0.00045415	0.186198	0.00260175		16.3372	0.331731	0.186792	0.00130106	0.587183
RA138 - 30		2023-02-02 22:47:31	36.504	110	102396	667.558	20325.2	291.377	1.60372e+06	17441.2	0.0721857	0.000509459	0.198466	0.00271592		15.9914	0.325529	0.198545	0.00135817	0.693915
C_WC1
WC-1 - 1		2023-02-02 14:02:57	36.503	110	72992.1	512.577	8263.86	231.184	1.60845e+06	13343.7	0.051197	0.000310952	0.112555	0.00286879		22.7889	0.462093	0.113243	0.0014344	0.0291155
WC-1 - 2		2023-02-02 14:04:20	36.3234	111	74730.5	813.561	8892.6	174.062	1.50053e+06	19242.9	0.0562417	0.000352664	0.118915	0.00167737		20.7745	0.421556	0.119025	0.000838685	0.298695	x
WC-1 - 3		2023-02-02 14:14:43	36.504	112	74136.4	430.094	8883.6	119.852	1.61342e+06	16082	0.051878	0.000308332	0.119867	0.00153846		22.7301	0.46068	0.119857	0.000769223	0.108181
WC-1 - 4		2023-02-02 14:16:06	37.9196	113	75638.5	1071.69	12373.2	346.76	1.54767e+06	21744	0.0554377	0.000420924	0.162502	0.00271291		21.2927	0.434469	0.163624	0.00135644	0.16243
WC-1 - 5		2023-02-02 14:54:06	36.505	110	70106.5	720.959	8928.03	182.314	1.53594e+06	18527.9	0.0515763	0.00029427	0.126921	0.00180984		23.2676	0.471176	0.127381	0.000904869	0.387014
WC-1 - 6		2023-02-02 14:55:29	36.505	110	69712.5	645.307	9676.88	169.67	1.46561e+06	19938.2	0.0537766	0.000338492	0.139736	0.00198851		22.3221	0.453002	0.138845	0.000994201	0.479315
WC-1 - 7		2023-02-02 15:33:33	36.505	110	62147.7	363.492	6987.67	81.8853	1.34086e+06	10739.4	0.0522259	0.000302685	0.112285	0.00138188		23.095	0.467828	0.112464	0.000690874	0.231744
WC-1 - 8		2023-02-02 15:34:57	36.516	110	66741.9	483.08	7357.1	103.43	1.41198e+06	14075.7	0.0534138	0.000319287	0.110253	0.00133512		22.5841	0.457778	0.110259	0.000667493	0.281174
WC-1 - 9		2023-02-02 16:13:08	36.506	110	85392.9	649.54	9255.01	139.829	1.8005e+06	22125.9	0.0536213	0.000301665	0.10825	0.00132513		22.5949	0.457428	0.108408	0.000662522	0.112039
WC-1 - 10		2023-02-02 16:14:31	36.508	110	68794	356.775	7587.08	108.666	1.43536e+06	7729.32	0.0540557	0.000347913	0.109834	0.00140903		22.4183	0.455203	0.110314	0.000704475	0.224014
WC-1 - 11		2023-02-02 16:52:44	36.508	110	63476.5	639.778	6217.74	131.96	1.34365e+06	18189.3	0.0534155	0.00035438	0.0982792	0.00201438		22.8747	0.464834	0.0979774	0.00100723	0.18381
WC-1 - 12		2023-02-02 16:54:06	36.507	110	75037.1	781.947	8267.89	599.135	1.60491e+06	14341.1	0.0529205	0.000441498	0.109015	0.00652543		23.0971	0.472976	0.110211	0.00326284	0.729156
WC-1 - 13		2023-02-02 17:32:16	36.518	110	74117.2	740.763	9351.88	172.755	1.48617e+06	16307	0.056308	0.000367787	0.125777	0.00156528		21.9553	0.44597	0.126208	0.000782733	0.439152
WC-1 - 14		2023-02-02 17:33:40	36.504	110	90774.9	846.723	12074.9	299.705	1.80837e+06	18812.3	0.056873	0.000616028	0.133127	0.00295257		21.7465	0.451608	0.133053	0.00147648	0.379936
WC-1 - 15		2023-02-02 18:11:53	36.516	110	83123.9	535.825	9544.93	102.427	1.75334e+06	16705.2	0.0535393	0.000331005	0.114649	0.00118696		23.3475	0.473611	0.114856	0.000593587	0.469316
WC-1 - 16		2023-02-02 18:13:15	36.505	110	74278.3	360.788	9428.54	107.371	1.51344e+06	14082.7	0.0554245	0.000340361	0.126983	0.00145903		22.5604	0.457573	0.126966	0.000729645	0.409354
WC-1 - 17		2023-02-02 18:51:19	36.504	110	114433	1827.41	14353.5	359.918	2.35105e+06	41298.9	0.0549346	0.000349184	0.125452	0.00189971		22.8747	0.464327	0.125463	0.000949947	0.378158
WC-1 - 18		2023-02-02 18:52:42	36.503	110	83324.2	603.11	11137.6	163.7	1.71381e+06	16713.5	0.0549529	0.000308794	0.133496	0.00171821		22.8675	0.462936	0.133698	0.000859187	0.227258
WC-1 - 19		2023-02-02 19:30:49	36.506	110	68893.7	350.956	8607.06	104.307	1.47003e+06	6863.02	0.052895	0.000303865	0.124853	0.00146532		23.6376	0.478735	0.124963	0.000732663	0.365752
WC-1 - 20		2023-02-02 19:32:12	36.503	110	74440.9	542.414	8528.05	174.325	1.59803e+06	11478.2	0.0524431	0.000309389	0.114274	0.00198513		23.8317	0.48293	0.114589	0.000992566	0.386765
WC-1 - 21		2023-02-02 20:10:16	36.504	110	79561	887.775	7672.66	199.036	1.76012e+06	23798.4	0.0512173	0.000260639	0.0955409	0.00167917		23.981	0.484636	0.0964611	0.000839591	0.163549
WC-1 - 22		2023-02-02 20:11:38	37.471	110	75017.3	590.244	9897.48	159.326	1.53734e+06	17374.4	0.0551552	0.000303545	0.132059	0.00170687		22.2502	0.450261	0.131968	0.000853442	0.384634
WC-1 - 23		2023-02-02 20:49:43	36.504	110	74441.9	745.258	9105.1	160.135	1.52696e+06	18357.6	0.0550472	0.000330371	0.122234	0.0014845		21.6676	0.43924	0.122341	0.000742223	0.369344
WC-1 - 24		2023-02-02 20:51:06	36.506	110	69833.3	365.484	8160.7	112.378	1.47785e+06	16718.5	0.053443	0.000339323	0.116985	0.00157636		22.292	0.452486	0.116888	0.000788144	0.168562
WC-1 - 25		2023-02-02 21:29:15	36.504	110	111048	1384.49	12095.5	242.277	2.36211e+06	19751.8	0.0525615	0.000391587	0.111218	0.00244524		21.9471	0.447533	0.108947	0.00122238	0.760764
WC-1 - 26		2023-02-02 21:30:39	36.504	110	77904.1	561.703	9022.95	92.6825	1.65895e+06	18799.8	0.0530703	0.000304473	0.116186	0.00128542		21.7135	0.439754	0.11585	0.000642576	0.495102
WC-1 - 27		2023-02-02 22:14:58	36.506	110	80561.5	476.433	9615.55	124.994	1.80116e+06	15110.5	0.0504908	0.000279141	0.11913	0.00135218		22.3862	0.453052	0.119386	0.000676015	0.110429
WC-1 - 28		2023-02-02 22:16:21	36.504	110	77264.3	468.037	9166.73	95.0127	1.74207e+06	14674.3	0.0500902	0.000270658	0.118733	0.00123842		22.5675	0.456532	0.11867	0.000619151	0.367425
WC-1 - 29		2023-02-02 22:48:58	36.507	110	72095.2	349.492	6610.94	146.331	1.64701e+06	10383.9	0.0493995	0.000279566	0.0917558	0.0019102		23.4142	0.474069	0.0917198	0.000955259	0.393966
WC-1 - 30		2023-02-02 22:50:21	36.504	110	79798.5	562.021	9412.05	150.607	1.74962e+06	16308.1	0.0514915	0.000232309	0.117899	0.00154927		22.5082	0.454099	0.117976	0.00077477	0.210786
C_RA138				110
RA138 - 1		2023-02-03 13:59:59	36.503	110	117830	1497.45	29311.3	834.496	1.71207e+06	16125.7	0.0649777	0.000672712	0.246634	0.00481471		15.0888	0.437778	0.248803	0.00240735	-0.665117
RA138 - 2		2023-02-03 14:09:39	36.507	110	103810	638.321	19026.8	312.229	1.63303e+06	13115.7	0.0599382	0.000342228	0.183468	0.00270469		16.4055	0.470679	0.183318	0.00135235	-0.394904
RA138 - 3		2023-02-03 15:00:21	36.505	110	102847	1316.2	23587.4	544.973	1.52249e+06	18741.8	0.0637224	0.000437024	0.228003	0.00297173		15.4714	0.444852	0.229385	0.00148586	-0.35146
RA138 - 4		2023-02-03 15:01:53	36.505	110	95464.9	676.685	12508.7	168.559	1.64578e+06	16236.5	0.0547476	0.000250659	0.130827	0.0013625		18.0047	0.515648	0.131052	0.000681251	0.138116
RA138 - 5		2023-02-03 15:51:14	36.506		110007	1113.62	29246.4	1165.13	1.49603e+06	18538.4	0.0698591	0.00104527	0.262079	0.007754		13.9872	0.41279	0.265906	0.003877	-0.790279
RA138 - 6		2023-02-03 15:52:44	36.508		70615.7	1292.54	17935.5	938.328	971781	15173.2	0.0688422	0.00121494	0.247977	0.00898469		14.1892	0.423983	0.254031	0.00449235	-0.775435
RA138 - 7		2023-02-03 16:41:43	36.504	110	91862.9	606.365	11596.7	265.906	1.49254e+06	13611.9	0.0581909	0.000293406	0.126214	0.00292851		16.6194	0.476297	0.126262	0.00146425	-0.49631
RA138 - 8		2023-02-03 16:43:14	36.504	110	92010.4	485.276	10954	165.477	1.51231e+06	10614.3	0.0574337	0.000308687	0.119101	0.00162418		16.8342	0.482706	0.119072	0.000812088	0.00515528
RA138 - 9		2023-02-03 17:32:36	36.504	110	81596.3	775.655	12781.8	458.457	1.27107e+06	13971.4	0.0602998	0.000440035	0.155059	0.00412052		15.9463	0.458938	0.156674	0.00206026	-0.730157	x
RA138 - 10		2023-02-03 17:34:06	36.506	110	99393.3	1332.51	18571.3	473.265	1.45708e+06	21216	0.0638086	0.000460049	0.186708	0.00351358		15.0685	0.43359	0.18688	0.00175679	-0.588491
RA138 - 11		2023-02-03 18:25:02	36.506	110	104318	1510.97	20807.5	412.821	1.64916e+06	33011.5	0.0599358	0.000385371	0.196641	0.00294736		16.0745	0.461794	0.199498	0.00147368	-0.479
RA138 - 12		2023-02-03 18:26:33	36.506	110	92949.5	997.675	20611.6	706.485	1.39567e+06	8331.23	0.0629448	0.000692791	0.223325	0.00589659		15.3088	0.445082	0.221789	0.0029483	-0.841171
RA138 - 13		2023-02-03 19:16:17	36.509	110	90273	1108.71	15919.4	444.762	1.44263e+06	17744.7	0.05892	0.0004443	0.176	0.00319867		16.5086	0.475379	0.176379	0.00159933	-0.632992
RA138 - 14		2023-02-03 19:17:49	36.521	110	90985.7	694.519	11607.2	256.713	1.55713e+06	14068.2	0.0550489	0.000283195	0.127156	0.00213364		17.6762	0.506664	0.127594	0.00106682	-0.0769084
RA138 - 15		2023-02-03 20:07:20	36.515	110	93140.5	790.12	14449.8	226.652	1.47743e+06	16520.5	0.0595532	0.000299138	0.155051	0.00178313		16.5754	0.475022	0.155167	0.000891563	-0.0833249
RA138 - 16		2023-02-03 20:08:52	36.506	110	92505	485.569	14783	332.138	1.46121e+06	12931.4	0.0598259	0.000344637	0.159628	0.003315		16.5079	0.473658	0.159835	0.0016575	-0.098405
RA138 - 17		2023-02-03 20:58:35	36.514	110	99349.4	1042.67	22327.1	728.881	1.39026e+06	10688.1	0.0671941	0.00068181	0.22459	0.00522462		14.9337	0.433007	0.224772	0.00261231	-0.810675
RA138 - 18		2023-02-03 21:00:07	36.506	110	114286	1101.67	27379.6	685.737	1.53716e+06	13584.3	0.070231	0.000623012	0.238287	0.0043221		14.2947	0.41298	0.239614	0.00216105	-0.459666
RA138 - 19		2023-02-03 21:51:11	36.504	110	114787	1900.93	11885	350.68	2.01266e+06	40232.4	0.0538771	0.000280802	0.103582	0.00233743		18.8936	0.541617	0.103558	0.00116872	-0.266826
RA138 - 20		2023-02-03 21:52:42	36.504	110	97262	716.23	19975.9	349.647	1.46693e+06	15274.6	0.0626074	0.000404896	0.20518	0.00294812		16.2644	0.467286	0.205418	0.00147406	-0.424022
RA138 - 21		2023-02-03 22:42:23	36.507	110	80560.9	834.011	12277.8	286.08	1.3078e+06	22507	0.0580905	0.000511293	0.153412	0.00390937		17.6581	0.510056	0.152431	0.00194291	-0.646474
RA138 - 22		2023-02-03 22:43:53	36.504	110	79330.1	878.827	8499.89	163.03	1.38609e+06	19480.9	0.0540963	0.000279564	0.106942	0.00181523		18.9637	0.543588	0.107165	0.000907613	-0.0736555
RA138 - 23		2023-02-03 23:33:49	36.504	110	105874	1714.04	31353.3	1069.39	1.35219e+06	18431.5	0.0732525	0.00105221	0.293238	0.00666528		13.9818	0.411589	0.296188	0.00333264	-0.832503
RA138 - 24		2023-02-03 23:35:19	36.504	110	106771	1602.48	28254.5	1159.61	1.46443e+06	15125.6	0.0687332	0.000992066	0.262916	0.00701109		14.898	0.438688	0.264673	0.00350554	-0.886928
RA138 - 25		2023-02-04 00:24:46	36.504	110	104878	1938.85	18867.5	1425.59	1.59159e+06	17774.5	0.0622211	0.00106334	0.174293	0.0100477		16.2592	0.484512	0.179931	0.00502386	-0.847346
RA138 - 26		2023-02-04 00:26:16	36.514	110	108346	1539.92	27157.8	729.258	1.4733e+06	24382.8	0.0695267	0.000632455	0.249384	0.00456563		14.543	0.420409	0.250703	0.00228282	-0.582246
RA138 - 27		2023-02-04 01:17:31	36.504	110	93889.4	1062.8	14631.5	399.249	1.62064e+06	20425	0.0552062	0.000507423	0.156717	0.00280354		17.8914	0.517338	0.155865	0.00140177	-0.116858
RA138 - 28		2023-02-04 01:19:02	36.505	110	92460.9	1093	14766.7	585.376	1.57545e+06	17572.1	0.055343	0.000577857	0.159254	0.0058218		17.8323	0.517517	0.159736	0.0029109	-0.802833
RA138 - 29		2023-02-04 02:08:37	36.504	110	84681	639.533	17272.5	261.64	1.388e+06	17251.7	0.0576356	0.00030016	0.204331	0.0030044		16.6108	0.476172	0.204007	0.0015022	-0.145171
RA138 - 30		2023-02-04 02:10:07	36.506	110	91602.2	686.798	19480.9	439.888	1.45519e+06	8196.76	0.0593874	0.000401924	0.211736	0.00360023		16.1049	0.462982	0.212706	0.00180012	-0.314239
RA138 - 31		2023-02-04 02:59:44	36.503	110	76417	679.764	8729.39	194.698	1.387e+06	15915.8	0.052152	0.000277201	0.113978	0.00199951		17.7754	0.509645	0.114254	0.000999755	-0.107667
RA138 - 32		2023-02-04 03:01:14	36.506	110	94628.7	743.532	13171.3	207.465	1.62789e+06	18610	0.0551708	0.000399908	0.139568	0.00170573		16.7884	0.483122	0.139214	0.000852866	0.106173
RA138 - 33		2023-02-04 03:50:32	36.506	110	97787	1714.72	25373.5	1106.26	1.45151e+06	18778.4	0.0634156	0.000808831	0.254317	0.00727611		14.3182	0.418831	0.259523	0.00363806	-0.818139
RA138 - 34		2023-02-04 03:52:03	36.505	110	100205	1923.57	26042	1416.03	1.46169e+06	12289.2	0.0644584	0.00137231	0.257767	0.00937673		14.0828	0.429076	0.259933	0.00468837	-0.822718
RA138 - 35		2023-02-04 04:43:23	36.517	110	105006	1861.79	24125.8	1187.78	1.61726e+06	17349	0.0614873	0.00093079	0.230665	0.00811441		14.9164	0.440544	0.229796	0.0040572	-0.852411
RA138 - 36		2023-02-04 04:44:54	36.504	110	101058	1570.47	23508.4	918.862	1.54606e+06	18654.6	0.0615698	0.000659582	0.231793	0.00593867		14.9113	0.433116	0.232664	0.00296934	-0.807885
RA138 - 37		2023-02-04 05:17:48	36.516	110	107834	1663.43	23293.9	552.716	1.64008e+06	24339.8	0.0612074	0.00054672	0.218708	0.00426951		15.5224	0.448524	0.216055	0.00213475	-0.754472
RA138 - 38		2023-02-04 05:19:19	36.506	110	90612.7	607.865	13914.1	300.289	1.54249e+06	14966.6	0.0552853	0.000292216	0.153509	0.00295577		17.2233	0.493791	0.153583	0.00147788	-0.212228
C_WC1
WC-1 - 1		2023-02-03 14:01:44	36.522	110	101344	920.875	15200.2	226.128	2.17964e+06	26580.5	0.0439474	0.000171095	0.14973	0.00149978		22.3228	0.638748	0.150012	0.000749891	0.116423
WC-1 - 2		2023-02-03 14:07:55	36.504	110	77610.9	531.762	8564.57	115.073	1.79111e+06	16090.4	0.0408883	0.000249847	0.110338	0.00139717		24.0379	0.690152	0.110372	0.000698586	0.0445064
WC-1 - 3		2023-02-03 14:57:16	36.506	110	78441.8	640.892	10188.7	128.114	1.67342e+06	17962.1	0.0442822	0.000192476	0.130082	0.00145915		22.27	0.637602	0.129911	0.000729575	0.0523805
WC-1 - 4		2023-02-03 14:58:47	36.508	110	79580.6	687.095	11084.2	124.567	1.79037e+06	21395.8	0.0419392	0.000198392	0.139381	0.00145432		23.5109	0.673486	0.139307	0.000727159	0.206382
WC-1 - 5		2023-02-03 15:47:58	36.506	110	76018.4	467.004	9351.19	162.415	1.66437e+06	9362.16	0.0430424	0.000243729	0.123048	0.0019838		22.7177	0.651725	0.123034	0.000991898	0.019929
WC-1 - 6		2023-02-03 15:49:40	36.504	110	75085.2	436.227	10688.8	127.611	1.63633e+06	13293.9	0.0433251	0.000214425	0.142243	0.0014591		22.5612	0.646492	0.14238	0.000729551	0.0798687
WC-1 - 7		2023-02-03 16:38:37	36.504	110	69266	656.989	9237.83	320.515	1.35381e+06	13901.8	0.0484574	0.000313709	0.13125	0.00284933		19.9687	0.573717	0.133391	0.00142466	-0.738105
WC-1 - 8		2023-02-03 16:40:08	36.578	110	62664.9	546.937	5714.87	111.887	1.32292e+06	14302.7	0.0447255	0.000248955	0.0911211	0.00152445		21.629	0.620392	0.0912133	0.000762225	0.125595
WC-1 - 9		2023-02-03 17:29:20	36.518	110	84315.6	902.037	7940.02	331.924	1.75379e+06	15173.6	0.0453311	0.000426574	0.0925031	0.00331267		21.2153	0.613823	0.0941868	0.00165633	-0.0614208
WC-1 - 10		2023-02-03 17:31:01	36.506	110	47136.7	305.84	6859.39	95.9241	926839	8777.21	0.0479518	0.000265554	0.14591	0.00195971		20.054	0.575188	0.145547	0.000979857	0.0045789
WC-1 - 11		2023-02-03 18:21:56	36.504	110	70594.1	619.406	9891.43	225.597	1.49805e+06	6388.92	0.0443461	0.00036927	0.140491	0.00260166		21.7178	0.626557	0.140142	0.00130083	-0.583603
WC-1 - 12		2023-02-03 18:23:27	36.508	110	77028	812.73	6540.72	111.968	1.75129e+06	24527	0.0415387	0.000225088	0.0853294	0.0014198		23.1895	0.664987	0.0849284	0.000709899	0.0893765
WC-1 - 13		2023-02-03 19:12:52	36.503	110	73669.7	767.841	9077.25	221.516	1.53737e+06	19213.3	0.0448933	0.00030484	0.123234	0.00248896		21.6485	0.622376	0.123237	0.00124448	-0.656395
WC-1 - 14		2023-02-03 19:14:33	36.503	110	75010.2	429.546	9698.57	117.267	1.64741e+06	14742.1	0.0430061	0.000226349	0.129643	0.00173371		22.6077	0.64814	0.129319	0.000864911	0.0356712
WC-1 - 15		2023-02-03 20:04:05	36.507	110	98115.5	1060.46	12993.9	265.375	2.02028e+06	30843.3	0.0456704	0.00026485	0.133513	0.00248243		21.5917	0.61957	0.132458	0.00124122	-0.668542
WC-1 - 16		2023-02-03 20:05:36	36.505	110	90063.7	956.286	7262.83	215.019	1.97494e+06	26978.3	0.0430961	0.000204572	0.0800924	0.00177524		22.8925	0.655787	0.0806553	0.000887622	-0.0772134
WC-1 - 17		2023-02-03 20:55:10	36.507	110	74843.6	507.154	7429.34	98.8666	1.52203e+06	16855.3	0.0464472	0.000262484	0.0993461	0.0012093		21.5813	0.619112	0.0992823	0.000604648	0.238481
WC-1 - 18		2023-02-03 20:56:51	36.504	110	96718.6	907.76	12358.8	164.113	1.98182e+06	24737.6	0.0461112	0.000231734	0.128173	0.00132964		21.7499	0.623316	0.127803	0.000664819	-0.109894
WC-1 - 19		2023-02-03 21:47:55	36.517	110	82538.3	480.504	10195.5	112.259	1.78037e+06	13795	0.0437896	0.000217356	0.123572	0.0013568		23.2289	0.665638	0.123546	0.000678402	0.168316
WC-1 - 20		2023-02-03 21:49:36	36.505	110	69888.2	508.232	11120.6	148.36	1.38674e+06	13470.2	0.0475953	0.000318955	0.159075	0.00162145		21.3797	0.614537	0.159148	0.000810725	-0.007171
WC-1 - 21		2023-02-03 22:39:09	36.504	110	60241.8	382.248	6956.62	100.385	1.31492e+06	10648	0.0432519	0.000217716	0.115357	0.0016052		23.7104	0.67951	0.115499	0.000802602	0.14914
WC-1 - 22		2023-02-03 22:40:39	36.506	110	64367.4	738.292	5391.76	122.773	1.4613e+06	12882	0.0414545	0.000208845	0.0840922	0.00203843		24.7413	0.709058	0.0837801	0.00101921	0.0387387
WC-1 - 23		2023-02-03 23:30:24	36.507	110	69406	494.891	5751.55	121.48	1.5545e+06	12296.9	0.042146	0.000220976	0.0828017	0.0014714		24.3117	0.696969	0.0828828	0.000735702	-0.23053
WC-1 - 24		2023-02-03 23:32:05	36.504	110	84271.2	374.347	10002.1	125.914	1.7893e+06	15945.8	0.0444635	0.000252984	0.118811	0.00159562		23.0398	0.660997	0.118711	0.000792224	0.118208
WC-1 - 25		2023-02-04 00:21:39	36.505	110	75734.6	424.196	6305.36	191.931	1.61594e+06	9415.37	0.0441736	0.000242034	0.082752	0.00215404		22.9265	0.657512	0.0832707	0.00107702	-0.569365
WC-1 - 26		2023-02-04 00:23:11	36.507	110	80135.1	597.131	10777	121.842	1.64447e+06	17407.5	0.0459967	0.000266128	0.134822	0.00145761		22.0064	0.631453	0.134509	0.000728803	0.0767624
WC-1 - 27		2023-02-04 01:14:06	36.506	110	57684.7	418.871	8326.44	106.721	1.28039e+06	14072.4	0.0425759	0.000251708	0.144051	0.00166723		23.2421	0.667061	0.144369	0.000833617	0.194253
WC-1 - 28		2023-02-04 01:15:47	36.506	110	97163	584.398	12962.1	113.571	2.23927e+06	22027.5	0.0410558	0.00019643	0.13301	0.00105597		24.0807	0.689864	0.133429	0.000527985	0.212992
WC-1 - 29		2023-02-04 02:05:22	36.512	110	90023	606.415	11778.6	116.547	2.05241e+06	25727.7	0.0415235	0.000226325	0.131128	0.00142345		23.1048	0.662593	0.130863	0.000711727	0.0407887
WC-1 - 30		2023-02-04 02:06:53	36.503	110	78963.7	403.558	8661.68	103.311	1.90798e+06	16800.1	0.0390662	0.000191055	0.109789	0.00122845		24.534	0.702959	0.109711	0.000614223	0.0855346
WC-1 - 31		2023-02-04 02:56:18	36.504	110	62223.7	502.119	7581.83	152.273	1.40136e+06	16436.4	0.0419525	0.000300139	0.122633	0.00241891		22.1406	0.637012	0.121869	0.00120946	-0.322716
WC-1 - 32		2023-02-04 02:58:00	36.505	110	75440.6	434.231	9144.1	100.577	1.76287e+06	15278.1	0.0403775	0.000190927	0.121261	0.00119258		22.9818	0.658328	0.121231	0.00059629	0.190463
WC-1 - 33		2023-02-04 03:47:27	36.504	110	69014.9	660.576	9487.04	191.589	1.58318e+06	19477.4	0.041141	0.000231919	0.137808	0.00206022		22.0843	0.633527	0.137488	0.00103011	-0.277723
WC-1 - 34		2023-02-04 03:48:57	36.506	110	80016.1	894.62	9260.5	380.119	1.88036e+06	10482.2	0.0400265	0.000342907	0.114291	0.00332372		22.692	0.655061	0.115753	0.00166186	-0.738304
WC-1 - 35		2023-02-04 04:39:57	36.538	110	74661.5	650.868	10075.1	136.909	1.69773e+06	16375.2	0.0414175	0.000252946	0.135396	0.00173514		22.0982	0.634457	0.134968	0.000867571	-0.0120565
WC-1 - 36		2023-02-04 04:41:38	36.504	110	68129.3	537.838	8001.39	112.708	1.59982e+06	18622	0.0402695	0.000249652	0.11733	0.00135009		22.7509	0.65331	0.117465	0.000675046	0.0162101
WC-1 - 37		2023-02-04 05:14:32	36.519	110	69612.2	462.922	6757.16	129.481	1.64619e+06	11226.7	0.039905	0.000197569	0.0970458	0.00175751		23.7009	0.679152	0.0970858	0.000878754	0.0602536
WC-1 - 38		2023-02-04 05:16:03	36.505	110	64869	540.965	7781.96	110.829	1.51088e+06	16254	0.0405793	0.000190111	0.120067	0.0014266		23.3557	0.668999	0.119985	0.000713299	0.0348287
RA138
RA138 - 1		2023-02-05 19:07:55	15.9472	110	87172	1369.56	11426.9	279.453	1.49299e+06	33872.9	0.0580934	0.000467464	0.131793	0.00189683		17.7067	0.292297	0.131861	0.00190515	0.368291
RA138 - 2		2023-02-05 19:09:11	21.2125	110	96518.9	594.344	13913.4	191.912	1.61439e+06	11169.1	0.0598092	0.000394508	0.143654	0.00158329		17.2072	0.281271	0.145006	0.00108874	0.127457
RA138 - 3		2023-02-05 19:43:04	31.5917	110	89294.7	745.562	12052	137.353	1.50286e+06	16489.6	0.0596365	0.000340152	0.135159	0.00133763		17.4111	0.283138	0.135768	0.000953411	0.00791189
RA138 - 4		2023-02-05 19:44:30	28.1381	110	96856.7	836.903	15719	222.304	1.56986e+06	17856.3	0.0618702	0.000362204	0.162071	0.00176497		16.786	0.273198	0.163252	0.00134483	0.112061
RA138 - 5		2023-02-05 20:25:06	32.1235	110	93583.2	568.665	15261.6	293.316	1.50994e+06	9816.93	0.0619845	0.000318004	0.162606	0.00258741		16.7872	0.27219	0.164047	0.00164361	0.00946515
RA138 - 6		2023-02-05 20:26:22	29.9975	110	105728	1050.87	19516.3	502.549	1.65297e+06	16364.4	0.0640005	0.000339267	0.183408	0.00312919		16.2577	0.263827	0.185683	0.00254751	0.293444
RA138 - 7		2023-02-05 21:07:06	26.3103	110	106973	826.076	17289.5	315.968	1.71555e+06	14706.9	0.0623829	0.000408047	0.162489	0.00307109		16.6156	0.271508	0.162583	0.0016033	0.345414
RA138 - 8		2023-02-05 21:47:47	21.116	110	109893	1035.22	19297.1	359.86	1.73246e+06	18520.2	0.0633026	0.000434589	0.175492	0.00272759		16.2654	0.266326	0.176639	0.00183436	0.383823
RA138 - 9		2023-02-05 22:34:37	25.0397	110	98939.9	1242.12	12721.2	201.406	1.70855e+06	21016.3	0.0581674	0.000453922	0.128076	0.00168045		17.5458	0.28913	0.129337	0.00129898	0.146559
RA138 - 10		2023-02-05 22:35:54	31.6043	110	100418	830.868	17094.4	378.573	1.63862e+06	14732.8	0.0613758	0.000470169	0.171387	0.00319355		16.6246	0.27367	0.171241	0.00201225	-0.188052
RA138 - 11		2023-02-05 23:16:26	31.7921	110	114858	1152.68	19107.5	447.321	1.87887e+06	19351.9	0.0612454	0.000375519	0.165986	0.00269349		16.5379	0.269582	0.167343	0.00211866	0.06111
RA138 - 12		2023-02-05 23:17:48	28.4015	110	104173	797.942	14333.5	181.382	1.76635e+06	19328.4	0.0590925	0.000371452	0.137264	0.00145621		17.1364	0.279589	0.138408	0.00101765	0.210686
RA138 - 13		2023-02-05 23:58:49	22.4582	110	94238.1	906.946	12777.8	253.994	1.64855e+06	15681.4	0.0572702	0.000360677	0.135199	0.00211372		17.5657	0.286614	0.136394	0.00149726	0.187709
RA138 - 14		2023-02-06 00:00:07	25.5826	110	110708	942.933	21526.4	410.945	1.78028e+06	18771.5	0.0624132	0.000478996	0.193778	0.00318006		16.1151	0.26531	0.195594	0.00203232	-0.168138
RA138 - 15		2023-02-06 00:46:51	21.7886	110	111750	986.567	24349.3	448.06	1.74265e+06	18783.6	0.0642434	0.000592454	0.217281	0.0030289		15.5563	0.259179	0.219181	0.00222353	-0.491598
RA138 - 16		2023-02-06 00:48:22	17.8041	110	86384.2	572.976	12267.6	189.238	1.51139e+06	12992.8	0.0573968	0.000567083	0.141669	0.00216635		17.4086	0.291677	0.142853	0.00119229	0.40262
RA138 - 17		2023-02-06 01:26:16	27.9677	110	110798	1495.08	24738.7	892.403	1.71084e+06	13410.1	0.0647972	0.000913401	0.221148	0.00511421		15.349	0.268496	0.2246	0.00429968	-0.736711
RA138 - 18		2023-02-06 01:27:46	24.5164	110	97675.9	698.792	15677.4	269.805	1.6612e+06	14130.5	0.0589038	0.000389092	0.161158	0.00216226		16.8817	0.275966	0.161455	0.00149571	0.0596546
RA138 - 19		2023-02-06 02:08:23	32.1911	110	104898	798.543	14731.2	190.693	1.8416e+06	16466.2	0.0570318	0.000345526	0.140167	0.00164249		17.3497	0.282696	0.141266	0.00105447	0.338795
RA138 - 20		2023-02-06 02:09:39	32.754	110	124682	1590.15	24825.6	575.627	2.01163e+06	29315	0.0622261	0.000440637	0.198287	0.00291893		15.8988	0.260689	0.200291	0.00263452	-0.13838
RA138 - 21		2023-02-06 02:48:49	35.113	110	115349	914.663	18425	338.143	1.97483e+06	17069.9	0.058465	0.000309678	0.15973	0.00228815		16.8322	0.273146	0.160679	0.0015967	0.29113
RA138 - 22		2023-02-06 03:32:51	24.6139	110	90342.6	840.829	14817.9	358.4	1.5623e+06	17099.1	0.0579049	0.000436409	0.163566	0.00293529		16.8752	0.277555	0.164991	0.00212535	0.291829
RA138 - 23		2023-02-06 03:34:18	16.8009	110	87363	570.894	12331.2	178.155	1.5652e+06	12731	0.0557916	0.00041668	0.141223	0.00206447		17.5099	0.287857	0.141985	0.00111907	0.0868498
RA138 - 24		2023-02-06 04:10:41	32.2071	110	113276	1006.3	21802.8	656.123	1.89985e+06	18842.8	0.0603457	0.000599717	0.19309	0.00461731		16.0755	0.269479	0.193616	0.00301968	-0.37379
RA138 - 25		2023-02-06 04:12:12	23.5974	110	105898	783.038	16986.4	317.01	1.85255e+06	10185.4	0.057211	0.000411811	0.160279	0.00248749		16.951	0.278157	0.161353	0.00160997	-0.0888526
RA138 - 26		2023-02-06 04:46:00	26.6771	110	91926.8	614.213	11928.8	170.044	1.68211e+06	14341.8	0.054697	0.000342899	0.129751	0.0016		17.5997	0.28712	0.130533	0.00102145	0.0839426
RA138 - 27		2023-02-06 05:21:27	25.4791	110	94183.1	640.887	14194.8	169.264	1.69329e+06	17858.6	0.0557419	0.000430428	0.150952	0.00202317		17.1279	0.282078	0.151608	0.00103461	-0.218477
RA138 - 28		2023-02-06 05:22:37	33.9063	110	105416	794.79	20890.4	340.359	1.76697e+06	15747.3	0.0600532	0.000446303	0.197342	0.00252028		15.894	0.261226	0.199344	0.00177883	-0.163253
RA138 - 29		2023-02-06 06:01:45	25.7536	110	120711	878.265	22535.1	545.784	2.02462e+06	19539.7	0.0595619	0.000480263	0.187506	0.00433444		15.8851	0.26226	0.187793	0.00236052	-0.29953
RA138 - 30		2023-02-06 06:03:08	23.4926	110	118780	1260.68	21922	754.886	2.01808e+06	15953.7	0.0587955	0.000471399	0.183661	0.00452451		16.0876	0.265513	0.185652	0.00332517	-0.339785
RA138 - 31		2023-02-06 06:42:23	18.6318	110	132363	1202.47	18923	561.663	2.37739e+06	17891.1	0.0557132	0.000446572	0.141882	0.00325971		16.8645	0.278332	0.143809	0.00221882	-0.327957
RA138 - 32		2023-02-06 06:43:45	18.1154	110	102927	836.592	16224.1	410.795	1.81492e+06	14222.7	0.0567375	0.000365254	0.156651	0.00316908		16.5573	0.270386	0.158561	0.00209586	0.0415915
RA138 - 33		2023-02-06 07:22:29	15.8905	110	95263.7	1068	16158.4	608.5	1.7115e+06	22284.3	0.0556561	0.000735367	0.169081	0.00487793		16.8472	0.291784	0.170623	0.00333229	-0.374415
RA138 - 34		2023-02-06 07:42:09	37.506	110	96740.9	580.532	15917.9	207.828	1.72718e+06	15157.2	0.0561557	0.000359077	0.164544	0.00196768		16.7277	0.273097	0.165516	0.00118217	0.153971
RA138 - 35		2023-02-06 07:43:40	28.7687	110	87007	574.456	12933.2	212.61	1.59057e+06	12883.1	0.0548078	0.000310837	0.148606	0.00206758		17.1432	0.278733	0.149526	0.00131666	0.110465
C_WC1
WC1 - 1		2023-02-05 19:10:46	11.0568	110	75035.8	1901.43	9142.05	278.607	1.6702e+06	32346.7	0.0452617	0.000532695	0.122582	0.00266001		22.7515	0.388077	0.122557	0.00241444	0.545007
WC1 - 2		2023-02-05 19:40:32	12.725	110	63581.2	1742.37	6994.35	287.335	1.42343e+06	46526.4	0.0450249	0.000550023	0.111091	0.00224638		23.052	0.395008	0.110658	0.00271619	0.266647
WC1 - 3		2023-02-05 19:41:30	10.5288	110	96512.6	2056.92	16847.9	458.855	1.88358e+06	31956.3	0.0508409	0.000601621	0.177284	0.00360172		20.4182	0.348504	0.175601	0.00301851	0.256876
WC1 - 4		2023-02-05 20:22:25	19.7765	110	73998.3	402.974	9133.18	121.859	1.61184e+06	11438.7	0.0459996	0.000334456	0.123361	0.00158005		22.6226	0.371407	0.124155	0.000889336	0.0352043
WC1 - 5		2023-02-05 20:23:33	29.9646	110	74054.1	508.776	8613.84	145.449	1.61012e+06	13355	0.0460529	0.000309346	0.115891	0.00166943		22.5957	0.369631	0.117007	0.00106022	0.168693
WC1 - 6		2023-02-05 21:04:16	24.3637	110	77873.5	564.852	10361.9	245.547	1.6674e+06	19075.7	0.0468659	0.000460787	0.132108	0.00263453		22.1254	0.370549	0.133849	0.00164878	0.0819697
WC1 - 7		2023-02-05 21:05:50	26.8205	110	85052	575.843	10110.3	138.02	1.86521e+06	19979.6	0.0456922	0.000327677	0.118999	0.00149687		22.6889	0.372247	0.119577	0.000905695	0.130129
WC1 - 8		2023-02-05 21:44:58	15.9774	110	78797.9	591.944	9655.66	161.478	1.70098e+06	8867.09	0.0461433	0.000497395	0.122955	0.00192994		22.3254	0.377138	0.123263	0.00112326	0.24063
WC1 - 9		2023-02-05 21:46:26	21.641	110	85961.3	791.563	10470.4	148.566	1.88494e+06	21885.9	0.0457229	0.000405086	0.122207	0.00184264		22.5247	0.374168	0.122525	0.00103017	0.311314
WC1 - 10		2023-02-05 22:31:49	22.1828	110	71872.3	641.337	7102.13	115.492	1.64352e+06	18299.5	0.0437298	0.000341733	0.0983343	0.00133258		23.351	0.384821	0.0994013	0.000916464	0.162922
WC1 - 11		2023-02-05 22:33:18	20.5395	110	82482.9	580.401	10233.5	159.764	1.85399e+06	10486.4	0.0445508	0.000332525	0.123933	0.00185842		22.9142	0.376691	0.124804	0.00106229	0.103964
WC1 - 12		2023-02-05 23:13:37	15.9322	110	87798.6	1139.96	12336.3	286.142	1.89746e+06	10672.6	0.0463253	0.000503936	0.139935	0.00313899		21.875	0.369876	0.14134	0.00186747	0.314614
WC1 - 13		2023-02-05 23:15:03	28.8559	110	78340.3	397.497	8491.67	144.161	1.76969e+06	9563.76	0.044293	0.000252545	0.108305	0.00176477		22.873	0.371956	0.109037	0.000960311	0.167775
WC1 - 14		2023-02-05 23:56:05	15.3202	110	75307.8	1211.03	8116.73	210.697	1.74877e+06	28463.4	0.0435151	0.000486849	0.107656	0.00174625		23.1277	0.392225	0.108419	0.00164559	0.300565
WC1 - 15		2023-02-05 23:57:16	23.9766	110	88419.4	693.321	11196.4	141.417	1.97137e+06	19830.4	0.044955	0.000366047	0.126803	0.00143441		22.383	0.369755	0.127378	0.00094127	0.590456
WC1 - 16		2023-02-06 00:44:17	10.5129	110	68693.7	3411.9	8076.49	586.294	1.55617e+06	94221.9	0.04398	0.000617304	0.119066	0.00306278		22.7312	0.397354	0.118269	0.00517073	0.544641
WC1 - 17		2023-02-06 00:45:14	18.7419	110	111564	1433.52	22166.2	557.033	2.21278e+06	15565.2	0.050413	0.000516942	0.20398	0.00504949		19.8281	0.333328	0.199862	0.00280387	-0.404665
WC1 - 18		2023-02-06 01:23:34	17.7754	110	77667.2	904.622	8523.36	198.137	1.79121e+06	22276.3	0.0433973	0.00032106	0.10957	0.00179805		22.9253	0.376702	0.110392	0.00142671	0.262693
WC1 - 19		2023-02-06 01:25:07	14.2936	110	70178.3	1311.75	8373.95	238.742	1.62444e+06	32206.9	0.0432217	0.0003827	0.120509	0.00197526		23.0141	0.382283	0.120031	0.00203394	0.0965697
WC1 - 20		2023-02-06 02:45:58	35.7141	110	69127.4	518.197	8088.9	142.088	1.5996e+06	15104.5	0.0433961	0.000288003	0.116888	0.0016657		22.6864	0.370928	0.117707	0.0011174	0.0320257
WC1 - 21		2023-02-06 02:47:22	30.0325	110	76541.3	545.831	8407.4	113.49	1.79368e+06	17768.8	0.0427914	0.000285991	0.110108	0.00125332		23.0024	0.376203	0.110492	0.000838456	0.100798
WC1 - 22		2023-02-06 03:31:09	18.9336	110	89595.8	1254.4	15070.9	607.642	1.9057e+06	14005.1	0.0467589	0.000426848	0.166247	0.00470738		20.9041	0.348008	0.169207	0.00358965	-0.442425
WC1 - 23		2023-02-06 04:07:51	31.4748	110	83778	636.081	10488.5	188.836	1.9616e+06	18711.8	0.042778	0.00027376	0.124972	0.00179848		22.6905	0.370458	0.125935	0.00122311	0.148138
WC1 - 24		2023-02-06 04:09:19	26.7373	110	70926.7	428.542	8005.62	107.447	1.6861e+06	11375.4	0.0420748	0.000309434	0.112932	0.00160521		23.0628	0.378848	0.11354	0.000830668	0.11422
WC1 - 25		2023-02-06 04:43:07	30.1602	110	78132.6	699.802	9429.67	148.11	1.8507e+06	21617.4	0.0422749	0.000259975	0.120627	0.00150049		22.7861	0.371472	0.121403	0.00109108	-0.0187987
WC1 - 26		2023-02-06 04:44:29	29.946	110	76173.8	456.106	9987.37	157.854	1.77411e+06	10532.7	0.0429258	0.000229698	0.130978	0.00168393		22.4336	0.364142	0.13189	0.001108	0.335445
WC1 - 27		2023-02-06 05:18:50	13.6976	110	65978.9	2509.98	7300.78	411.996	1.60944e+06	75191.5	0.0410569	0.000529551	0.111463	0.00231539		23.2685	0.401614	0.111309	0.00376536	0.491404
WC1 - 28		2023-02-06 05:20:07	18.1348	110	66101.9	805.139	7879.38	185.786	1.58425e+06	22841.3	0.0417534	0.000310961	0.119125	0.00221555		22.8734	0.375977	0.119907	0.00158173	0.290873
WC1 - 29		2023-02-06 05:58:57	37.506	110	62322.4	601.065	8329.24	140.367	1.45485e+06	20290.9	0.0430891	0.000341746	0.133624	0.00194191		21.9708	0.362381	0.134439	0.00129752	-0.0126662
WC1 - 30		2023-02-06 06:00:19	18.3779	110	101718	1243.1	16475.4	342.379	2.24949e+06	25229.3	0.0452036	0.000233733	0.164889	0.00421674		20.9371	0.339544	0.16293	0.00195243	0.0613155
WC1 - 31		2023-02-06 06:40:54	19.7443	110	88696.4	1534.85	11972.9	401.404	2.04871e+06	33572.7	0.043341	0.000364335	0.138585	0.0052775		21.6828	0.358904	0.135787	0.00254644	0.191061
WC1 - 32		2023-02-06 07:19:19	34.1014	110	77137.8	878.361	11922.8	219.411	1.77889e+06	25781.2	0.0434927	0.000299012	0.153242	0.00185093		21.5568	0.352989	0.15548	0.00167244	0.299566
WC1 - 33		2023-02-06 07:20:52	23.8427	110	63902.6	609.636	8311.26	148.026	1.53922e+06	15523.1	0.041587	0.000253225	0.129778	0.00188997		22.5456	0.367422	0.130832	0.00131391	0.348014
WC1 - 34		2023-02-06 07:39:41	12.8962	110	60576.5	1114.67	6990.57	206.823	1.49346e+06	35937.8	0.0406769	0.000501946	0.115684	0.00245542		23.0849	0.396084	0.116084	0.00201036	0.0974321
WC1 - 35		2023-02-06 07:40:58	22.959	110	67563	506.7	7661.11	117.179	1.67052e+06	19184.6	0.0405005	0.000292188	0.113212	0.00148545		23.1896	0.380571	0.114064	0.000965818	0.20275
C_RA138
RA138 - 1		2023-02-10 16:19:44	36.532	110	126144	2302.4	24290.6	2138.67	2.06852e+06	14860.6	0.062896	0.00121034	0.192285	0.00923067		16.5888	0.426592	0.192486	0.00461497	-0.940995
RA138 - 2		2023-02-10 16:33:40	36.506	110	130513	1361.48	28988	983.974	2.05518e+06	16079.4	0.0655304	0.000715994	0.221755	0.00461607		16.0054	0.391583	0.222019	0.00230814	-0.835347
RA138 - 3		2023-02-10 17:38:25	36.507	110	133877	840.771	29247.2	731.553	1.86885e+06	17179.8	0.0739086	0.000700189	0.218312	0.00440975		14.4764	0.351976	0.218376	0.0022047	-0.803612	x
RA138 - 4		2023-02-10 17:39:53	36.505	110	134536	1252.27	31283.2	821.344	1.83277e+06	14024.8	0.075638	0.000571315	0.232057	0.0040527		14.1507	0.34167	0.232434	0.00202619	-0.586135	x
RA138 - 5		2023-02-10 18:40:02	36.504	110	137879	1304.45	32857.5	922.553	1.90627e+06	11636.1	0.0746312	0.000612732	0.237682	0.00465576		14.5257	0.351502	0.238212	0.00232796	-0.564754
RA138 - 6		2023-02-10 18:41:30	36.504	110	134842	1077.54	30806.5	629.433	1.91195e+06	15082.6	0.0727908	0.000457535	0.228464	0.0032786		14.8968	0.358328	0.228372	0.00163938	-0.566923
RA138 - 7		2023-02-10 19:41:36	36.504	110	120579	768.934	20225.9	237.889	1.91104e+06	16127.2	0.0650599	0.000310526	0.167794	0.00153485		16.8091	0.402863	0.167673	0.000767563	-0.0599574
RA138 - 8		2023-02-10 19:43:04	36.506	110	130032	1326.23	28650.8	1124.72	1.91451e+06	12588	0.0701546	0.000771017	0.219946	0.00551955		15.591	0.381555	0.220248	0.00276025	-0.85093
RA138 - 9		2023-02-10 20:43:18	36.504	110	131161	902.057	27796.8	509.511	1.92097e+06	14888.8	0.070289	0.000425312	0.212078	0.00281507		15.6469	0.376135	0.211845	0.00140709	-0.494343
RA138 - 10		2023-02-10 20:44:46	36.527	110	152625	982.982	40740.1	748.282	2.03403e+06	15937.9	0.0778546	0.00067825	0.268497	0.00391744		14.1279	0.342494	0.266822	0.00195813	-0.70155
RA138 - 11		2023-02-10 21:43:06	36.504	110	135013	952.524	25644.7	470.436	2.06397e+06	15324.9	0.0674468	0.000394755	0.190407	0.00275582		16.3652	0.393201	0.189867	0.00137804	-0.47317
RA138 - 12		2023-02-10 21:44:34	36.528	110	127107	877.952	22583.5	315.229	1.95378e+06	15758.4	0.0670614	0.000479711	0.177662	0.00201765		16.4604	0.396936	0.177602	0.00100892	0.0521192
RA138 - 13		2023-02-10 22:44:46	36.504	110	126513	451.389	18393.4	189.754	2.15561e+06	10809.1	0.060575	0.00027903	0.145341	0.00143563		18.2715	0.437762	0.145329	0.000717874	0.150457	x
RA138 - 14		2023-02-10 22:46:14	36.504	110	125379	1122.36	27067.2	481.309	1.90404e+06	19352.3	0.0679585	0.000418251	0.215629	0.00268848		16.2873	0.391637	0.215796	0.00134439	-0.284511
RA138 - 15		2023-02-10 23:46:36	23.4211	110	126054	644.515	20753.8	268.692	1.97409e+06	10031.5	0.0649276	0.000340463	0.164642	0.00178411		17.087	0.409944	0.164576	0.000892009	0.0144742
RA138 - 16		2023-02-10 23:47:52	36.503	110	136399	1894.89	27960	1424.64	2.02577e+06	17115.2	0.0689396	0.000714363	0.204646	0.0068569		16.0934	0.392745	0.204905	0.00342826	-0.816022
RA138 - 17		2023-02-11 00:48:28	18.4078	110	128266	1412.93	19220	248.854	2.13136e+06	20015.2	0.0637155	0.000397129	0.149832	0.00213725		17.4506	0.419697	0.149784	0.00106854	0.278077
RA138 - 18		2023-02-11 00:49:59	35.6306	110	134951	976.179	28777.8	496.251	1.97728e+06	16425.1	0.0703806	0.000373608	0.212946	0.00268654		15.7988	0.379093	0.213161	0.00134316	-0.361013
RA138 - 19		2023-02-11 01:48:53	36.506	110	136170	1066.38	29143.3	649.22	2.04405e+06	16388.4	0.0686645	0.000517446	0.214021	0.00347898		16.2196	0.391601	0.213936	0.00173969	-0.520052
RA138 - 20		2023-02-11 01:50:21	36.503	110	130056	959.999	19789.3	569.973	2.12495e+06	11412.7	0.06297	0.000435158	0.153236	0.00386943		17.6868	0.426197	0.152098	0.00193496	-0.620475
RA138 - 21		2023-02-11 02:51:02	36.504	110	140529	991.804	34079.5	798.032	2.05217e+06	15175.6	0.0705116	0.000633904	0.24357	0.00444225		15.7966	0.38335	0.242411	0.0022211	-0.783186	x
RA138 - 22		2023-02-11 02:52:30	36.504	110	139505	1200.62	30929.4	571.267	2.11874e+06	20173.6	0.0678718	0.000455311	0.222812	0.00308006		16.4105	0.395208	0.221619	0.00154001	-0.559468
RA138 - 23		2023-02-11 03:53:11	36.506	110	128191	835.151	26138	560.55	2.037e+06	13484.4	0.0649915	0.000434165	0.20526	0.00368853		17.08	0.411297	0.203818	0.00184424	-0.652199	x
RA138 - 24		2023-02-11 03:54:39	36.511	110	139482	1270.77	30567.7	840.085	2.15137e+06	15342.5	0.0668946	0.000550173	0.219152	0.00420126		16.5917	0.401516	0.219064	0.00210063	-0.730959	x
RA138 - 25		2023-02-11 04:55:20	36.514	110	133728	778.167	29226.2	501.101	2.04139e+06	14107.9	0.0674889	0.000388978	0.218222	0.00289976		16.2852	0.391192	0.218462	0.00144988	-0.492452
RA138 - 26		2023-02-11 04:56:48	36.51	110	135476	960.921	29264.9	540.219	2.07713e+06	13905.4	0.067296	0.000487392	0.21592	0.0030877		16.3262	0.393808	0.21593	0.00154385	-0.364842
RA138 - 27		2023-02-11 05:57:31	36.505	110	136791	1146.89	29173.1	512.726	2.01398e+06	18071	0.0700796	0.000413773	0.212991	0.00241401		15.3587	0.369067	0.213182	0.00120698	-0.282392
RA138 - 28		2023-02-11 05:59:08	27.3381	110	127129	791.368	21971.9	409.463	1.95362e+06	16526.1	0.0663226	0.000432535	0.17269	0.00299935		16.2166	0.39033	0.172763	0.00149964	-0.427289
RA138 - 29		2023-02-11 06:45:50	36.504	110	131170	945.188	23570.4	408.339	2.2089e+06	20117.3	0.0612717	0.000354482	0.179516	0.00263833		17.0843	0.410411	0.179622	0.00131915	-0.446881
RA138 - 30		2023-02-11 07:04:40	37.3459	110	134491	1311.79	30619.7	595.764	2.00331e+06	19511.4	0.0693939	0.000448065	0.227544	0.00274047		14.8667	0.357772	0.22758	0.00137024	-0.225588
C_WC1
WC-1 - 1		2023-02-10 16:18:12	28.9316	110	75734.9	709.281	7610.7	127.171	1.7107e+06	20362.2	0.0451586	0.000327246	0.100545	0.00161272		23.0908	0.556985	0.100451	0.00080628	0.147422
WC-1 - 2		2023-02-10 16:32:01	36.506	110	87567.7	573.63	9374.64	287.112	2.00086e+06	14226.3	0.0451995	0.000272213	0.107233	0.0027493		23.1909	0.557444	0.107013	0.00137469	-0.43608
WC-1 - 3		2023-02-10 17:35:18	36.504	110	56823.4	334.664	7525.29	106.982	1.1096e+06	9098.59	0.0528386	0.000322757	0.13198	0.00160162		20.2328	0.48645	0.13238	0.000800761	0.06878
WC-1 - 4		2023-02-10 17:36:47	36.504	110	89928	707.152	11809.7	198.809	1.69566e+06	14180.7	0.0547373	0.000303847	0.131191	0.00158668		19.5384	0.469094	0.131272	0.000793287	-0.0709601
WC-1 - 5		2023-02-10 18:36:55	36.51	110	98470.4	542.651	13425.9	125.842	1.95322e+06	11989.7	0.0519138	0.000269332	0.136734	0.00119033		20.8707	0.500657	0.13629	0.000595167	-0.145994
WC-1 - 6		2023-02-10 18:38:26	34.0918	110	96998	743.471	8339.2	277.296	2.05303e+06	21072.4	0.0482669	0.00032988	0.0862759	0.00262529		22.4537	0.540941	0.0859385	0.00131268	-0.692829
WC-1 - 7		2023-02-10 19:38:29	36.508	110	76152.8	523.659	10115.7	161.094	1.55972e+06	12431.1	0.0503013	0.000251751	0.132746	0.00161379		21.7332	0.521135	0.132782	0.000807049	-0.298422
WC-1 - 8		2023-02-10 19:39:57	36.519	110	69301	890.776	10018.8	168.349	1.389e+06	21933.1	0.0514785	0.000329214	0.14426	0.00184602		21.2398	0.511057	0.144512	0.000923181	0.148167
WC-1 - 9		2023-02-10 20:40:11	36.504	110	81225.2	434.204	9720.18	138.048	1.67004e+06	9719.24	0.0500288	0.000305612	0.119845	0.00167941		21.9783	0.528417	0.119622	0.000839427	-0.050393
WC-1 - 10		2023-02-10 20:41:40	36.507	110	69491.9	447.667	6740.69	109.738	1.49693e+06	9694.37	0.0478031	0.000251649	0.0968388	0.00145301		23.0042	0.551932	0.0969609	0.000726272	0.0188967
WC-1 - 11		2023-02-10 21:39:59	36.507	110	69794.6	443.325	7064.34	186.448	1.47209e+06	8516.95	0.0488487	0.00028584	0.101512	0.00239286		22.5922	0.542816	0.101176	0.00119656	-0.407448
WC-1 - 12		2023-02-10 21:41:27	36.518	110	55869.2	520.317	7350.54	117.621	1.15356e+06	6461.03	0.0498145	0.000317398	0.131121	0.00171752		22.1559	0.533065	0.131514	0.000858844	0.261892
WC-1 - 13		2023-02-10 22:41:39	36.504	110	82654.9	695.62	11186.1	147.398	1.75258e+06	18952.4	0.0485146	0.000341894	0.135502	0.00181455		22.8107	0.549893	0.135281	0.000907335	-0.861698
WC-1 - 14		2023-02-10 22:43:07	36.504	110	83293.3	953.383	10035.6	162.67	1.81852e+06	27326.9	0.0472767	0.00021129	0.119491	0.00225434		23.4094	0.56071	0.120437	0.00112726	0.468919
WC-1 - 15		2023-02-10 23:43:17	36.523	110	79375.3	421.684	9967.7	103.099	1.70884e+06	12049.8	0.0479415	0.000250049	0.125738	0.00124706		23.1382	0.555087	0.125527	0.000623501	0.0556925
WC-1 - 16		2023-02-10 23:44:45	36.505	110	94872	876.967	10715.1	209.76	1.99154e+06	22253.7	0.0491424	0.000240971	0.112793	0.00174133		22.574	0.541179	0.112898	0.000870624	-0.124708
WC-1 - 17		2023-02-11 00:45:23	36.505	110	97696.7	429.685	12328.1	114.216	2.01481e+06	17056.9	0.0500626	0.00031341	0.126248	0.00121192		22.2073	0.534139	0.126137	0.000605918	0.0566799
WC-1 - 18		2023-02-11 00:46:52	36.504	110	57115.9	515.577	8837	119.893	1.09143e+06	13120.2	0.054012	0.000367009	0.154312	0.00173559		20.5845	0.495854	0.154659	0.000867734	0.125727
WC-1 - 19		2023-02-11 01:45:46	36.506	110	108097	473.913	13867.1	153.139	2.2724e+06	10493.7	0.0490915	0.000240865	0.12841	0.00133506		22.6851	0.543845	0.128233	0.000667592	-0.0772745
WC-1 - 20		2023-02-11 01:47:14	36.508	110	82668.2	535.578	12914.5	230.189	1.69991e+06	10798.6	0.0501109	0.000299906	0.156145	0.0023468		22.2242	0.534156	0.156158	0.00117352	-0.322088
WC-1 - 21		2023-02-11 02:47:54	36.611	110	81207.4	494.349	8578.96	123.529	1.77714e+06	15161.5	0.0471419	0.00024178	0.105693	0.00127562		23.6289	0.566747	0.1056	0.000637829	-0.0222985
WC-1 - 22		2023-02-11 02:49:23	36.515	110	60991.7	610.999	8362.02	180.311	1.31337e+06	12725.2	0.0478961	0.000312814	0.136666	0.00197928		23.2562	0.559786	0.137046	0.000989657	-0.147182
WC-1 - 23		2023-02-11 03:50:04	36.509	110	92543	464.4	12365.4	130.969	2.10272e+06	17683.4	0.0453707	0.000254595	0.133463	0.00127177		24.4736	0.587669	0.133564	0.000635861	0.0847757
WC-1 - 24		2023-02-11 03:51:32	36.504	110	86946.5	1346.49	11701.3	196.381	1.88005e+06	37830.7	0.0476664	0.000259474	0.134897	0.00173791		23.2917	0.559063	0.134527	0.000868939	-0.0712898
WC-1 - 25		2023-02-11 04:52:13	36.507	110	73143.2	339.579	8549.22	145.425	1.59299e+06	11816	0.0473474	0.000259319	0.116762	0.00183467		23.2295	0.557614	0.116837	0.000917326	0.0786571
WC-1 - 26		2023-02-11 04:53:41	36.514	110	91156.1	574.642	12244.4	221.159	2.0101e+06	13489.6	0.0467553	0.000327034	0.134965	0.00233917		23.5158	0.566799	0.134269	0.00116958	-0.430489
WC-1 - 27		2023-02-11 05:54:23	14.8713	110	96961.9	1101.01	12379.6	281.504	2.06511e+06	9913.25	0.049602	0.000404299	0.127389	0.00266627		21.7297	0.52572	0.127624	0.0013331	-0.13426
WC-1 - 28		2023-02-11 05:55:52	36.505	110	67843.6	718.541	7439.88	195.566	1.44761e+06	19495.7	0.0482803	0.000285542	0.109911	0.00247763		22.31	0.536119	0.109618	0.00123879	-0.483592
WC-1 - 29		2023-02-11 06:44:11	36.506	110	78925	498.427	9222.5	116.638	1.76995e+06	11928.6	0.0460088	0.00023958	0.116727	0.00125062		22.7783	0.546441	0.116805	0.000625306	0.162343
WC-1 - 30		2023-02-11 07:03:02	36.504	110	104775	535.949	12060.3	254.98	2.35169e+06	18457	0.0459339	0.00026854	0.115441	0.00229748		22.4901	0.540355	0.115061	0.00114875	-0.392877
RA138
RA138 - 1		2023-03-02 10:26:32	26.6525	110	95067.3	907.943	15104.3	376.161	1.54608e+06	12346.6	0.0628742	0.000392595	0.158685	0.00274579		16.8972	0.320721	0.158971	0.00137284	0.673789
RA138 - 2		2023-03-02 10:27:52	38.01	110	94020.3	535.415	14573.5	127.472	1.55342e+06	12051	0.0628441	0.000283313	0.155213	0.00149675		16.909	0.31886	0.155093	0.000748355	0.0827008
RA138 - 3		2023-03-02 11:17:59	38.042	110	94549.9	634.723	13155.9	165.793	1.60352e+06	12316.1	0.0611868	0.000281173	0.139696	0.00129317		17.5098	0.330281	0.139223	0.000646765	0.297809
RA138 - 4		2023-03-02 11:19:29	38.005	110	97789.1	618.771	17924	211.445	1.56105e+06	14594.3	0.0652706	0.00031595	0.183116	0.00183649		16.4181	0.30994	0.183397	0.000918508	0.530302
RA138 - 5		2023-03-02 12:09:32	38.008	110	86147.4	641.018	14286	236.375	1.42007e+06	15309.7	0.0629597	0.00035089	0.165982	0.00238753		17.1347	0.324334	0.165927	0.00119395	0.2071
RA138 - 6		2023-03-02 12:11:03	38.005	110	96660.1	1026.38	12292.7	231.568	1.67775e+06	16168.9	0.0600893	0.000352739	0.127154	0.0019898		17.9562	0.340287	0.127247	0.000995054	0.118599
RA138 - 7		2023-03-02 12:59:18	38.003	110	102490	769.17	24449.5	426.646	1.49498e+06	10695.3	0.0712992	0.000546804	0.237334	0.00371295		15.1943	0.290376	0.238692	0.00185635	-0.000220483
RA138 - 8		2023-03-02 13:00:48	38.017	110	102637	1030.4	31544.4	533.631	1.29749e+06	21547.1	0.0824303	0.000928042	0.30847	0.00432935		13.1436	0.25696	0.307517	0.00216452	0.912159
RA138 - 9		2023-03-02 13:50:35	28.5398	110	92179.6	1307.6	14759.2	656.976	1.51984e+06	25753.7	0.0637246	0.000418801	0.158039	0.00570025		17.0273	0.323661	0.160205	0.00284981	0.0355471
RA138 - 10		2023-03-02 13:52:05	23.8764	110	107057	960.79	18651.6	335.332	1.72303e+06	16747.1	0.0656619	0.000400225	0.173899	0.00224507		16.525	0.313457	0.174322	0.00112241	0.317508
RA138 - 11		2023-03-02 14:42:14	38.013	110	95755.1	473.865	14321	165.978	1.58244e+06	10378.1	0.0627982	0.000308277	0.149662	0.00136486		17.264	0.325987	0.149644	0.000682434	0.548907
RA138 - 12		2023-03-02 14:43:52	30.9811	110	104319	1323.76	15353.8	281.765	1.70551e+06	22632.2	0.0627813	0.000291935	0.14701	0.00157369		17.2677	0.325772	0.147265	0.000786857	0.413649
RA138 - 13		2023-03-02 15:32:16	38.076	110	96696.7	664.73	13536.6	133.452	1.6372e+06	13639.4	0.0613502	0.000270828	0.140192	0.00133105		17.6294	0.332347	0.140071	0.000665512	0.0166575
RA138 - 14		2023-03-02 15:33:47	38.003	110	88338.2	760.751	13994.8	265.395	1.43964e+06	11085.9	0.063749	0.000320981	0.158591	0.0020536		16.9645	0.320472	0.158514	0.00102678	0.524727
RA138 - 15		2023-03-02 16:24:03	6.39643	110	171226	14481.4	74973.6	9916.5	1.73794e+06	55782.2	0.107616	0.00729537	0.421673	0.0266125		10.0188	0.38795	0.438113	0.0133052	0.579709
RA138 - 16		2023-03-02 16:24:13	27.8796	110	106682	933.475	19349.2	353.556	1.6341e+06	14931.7	0.0669213	0.000375875	0.181151	0.00230387		16.1109	0.305007	0.181476	0.00115184	0.658513
RA138 - 17		2023-03-02 16:25:33	38.02	110	104877	949.077	23820	413.93	1.54296e+06	19531.9	0.0708126	0.000518714	0.227864	0.00305078		15.2244	0.290437	0.227255	0.00152527	0.779177
RA138 - 18		2023-03-02 17:16:04	38.01	110	103341	702.641	20623	286.508	1.60368e+06	13993.1	0.0670677	0.000300074	0.199896	0.00194008		16.0297	0.302247	0.199677	0.00097024	0.53269
RA138 - 19		2023-03-02 17:17:34	38.009	110	102523	1427.49	18544.9	512.414	1.60792e+06	24384	0.0663702	0.000438901	0.180027	0.00329201		16.1971	0.307937	0.18099	0.00164636	0.236564
RA138 - 20		2023-03-02 18:06:05	38.042	110	91612.2	850.134	12909.4	224.037	1.55563e+06	17624.4	0.0613463	0.000276154	0.140778	0.00177938		17.4925	0.329857	0.140994	0.000889853	0.482973
RA138 - 21		2023-03-02 18:07:39	33.1407	110	116721	1355.3	29781.9	608.96	1.60521e+06	22119.9	0.075055	0.000531732	0.254555	0.00391323		14.297	0.27242	0.2553	0.00195694	0.695305
RA138 - 22		2023-03-02 18:57:41	38.01	110	94294.2	592.259	16515.9	276.179	1.5161e+06	12941.1	0.064655	0.000321496	0.174703	0.00248974		16.585	0.313234	0.175253	0.00124466	0.00862416
RA138 - 23		2023-03-02 18:59:11	38.006	110	93489.5	851.251	14093.2	268.273	1.55329e+06	13424	0.0625015	0.00034494	0.150025	0.00185153		17.1563	0.324675	0.150833	0.000925608	0.580858
RA138 - 24		2023-03-02 19:49:17	38.011	110	98169.6	2257.21	27470.5	323.491	1.32215e+06	36089.4	0.0774532	0.000624907	0.284226	0.00487203		13.8433	0.265124	0.279987	0.00243571	0.7231
RA138 - 25		2023-03-02 19:50:50	33.7496	110	96419.6	641.676	15789.4	301.864	1.6074e+06	11391.5	0.062031	0.000397075	0.164478	0.00351199		17.2849	0.328306	0.163851	0.00165749	0.268415
RA138 - 26		2023-03-02 20:39:11	38.006	110	99989.2	674.165	15427.7	173.089	1.67052e+06	15086.7	0.0622056	0.000254379	0.154368	0.00133801		17.2216	0.324344	0.154382	0.000668984	0.0363338
RA138 - 27		2023-03-02 20:40:42	17.8327	110	136110	4090.09	41484.9	3303.77	1.81561e+06	13246.3	0.0800542	0.00235074	0.295031	0.0141603		13.3811	0.318372	0.304965	0.00708002	0.984691
RA138 - 28		2023-03-02 20:41:03	14.4682	110	106005	1416.86	20775.4	563.922	1.61038e+06	16193.2	0.0668091	0.000567725	0.195497	0.00351247		16.0338	0.30782	0.196096	0.0017562	0.644067
RA138 - 29		2023-03-02 21:30:39	38.014	110	109363	1480.09	28874.9	1030.15	1.52813e+06	13623.8	0.0744171	0.000866831	0.263574	0.00658473		14.3343	0.281055	0.264178	0.00329298	0.971146
RA138 - 30		2023-03-02 21:32:07	38.005	110	103397	619.648	15815.1	247.992	1.71296e+06	12378.2	0.0626871	0.000265602	0.153457	0.00202069		17.013	0.320553	0.153043	0.00101054	0.415118
RA138 - 31		2023-03-02 22:19:37	35.5964	110	104649	744.783	26307.1	509.43	1.53543e+06	13440.8	0.0708196	0.000606071	0.253383	0.00423318		14.8979	0.286114	0.251529	0.00211662	0.57065
RA138 - 32		2023-03-02 22:21:05	36.4481	110	89007.7	570.631	13041.9	157.612	1.55025e+06	15310.5	0.0597919	0.000264025	0.146575	0.00165165		17.6371	0.332493	0.146609	0.00082583	0.43643
C_WC1
WC-1 - 1		2023-03-02 10:23:06	37.9802	110	85596.8	801.297	11133.5	154.428	1.92147e+06	16406.6	0.0464603	0.000379718	0.130294	0.00170071		22.8538	0.437947	0.130144	0.000850292	0.0237447
WC-1 - 2		2023-03-02 10:24:42	38.005	110	62452.6	647.119	6811.32	113.094	1.40472e+06	19152.6	0.0463632	0.000256126	0.110002	0.00176748		22.9077	0.433525	0.109126	0.000883692	0.0429477
WC-1 - 3		2023-03-02 11:14:43	38.004	110	47196.7	324.035	4421.99	115.845	1.07052e+06	5033.22	0.045832	0.000316501	0.0936178	0.0025093		23.3642	0.444806	0.0937466	0.00125499	0.111181
WC-1 - 4		2023-03-02 11:16:19	38.004	110	81860.8	661.62	8735.35	100.591	1.89229e+06	22606.2	0.0451216	0.000200046	0.106922	0.00122028		23.7379	0.447531	0.106771	0.000610309	0.248271
WC-1 - 5		2023-03-02 12:06:31	38.003	110	69190.3	605.795	6402.61	112.379	1.61022e+06	20066.9	0.0448114	0.000246178	0.0927327	0.00160447		24.066	0.455392	0.0925893	0.000802377	0.138352
WC-1 - 6		2023-03-02 12:08:01	37.1802	110	57350.1	594.199	7115.83	183.703	1.23673e+06	9542.15	0.0480871	0.000341931	0.123175	0.00242402		22.4304	0.427452	0.124148	0.00121222	0.255619
WC-1 - 7		2023-03-02 12:56:10	38.006	110	79470.3	461.15	9460.66	123.163	1.74899e+06	10217.6	0.0471527	0.000236601	0.119285	0.00144561		22.9709	0.43391	0.119115	0.000722762	0.174335
WC-1 - 8		2023-03-02 12:57:45	38.004	110	82365	804.927	9240.05	135.524	1.87444e+06	22888.7	0.0457644	0.000255525	0.111886	0.00159476		23.67	0.448055	0.112249	0.000797331	0.0996604
WC-1 - 9		2023-03-02 13:47:26	36.6245	110	85219.6	422.913	10213.3	94.828	1.81175e+06	13634.1	0.048949	0.00023012	0.119859	0.00108139		22.1666	0.418266	0.119916	0.000540632	0.1399
WC-1 - 10		2023-03-02 13:49:02	38.011	110	80196.5	593.411	8444.59	121.412	1.75185e+06	10700.7	0.0474852	0.000283559	0.10585	0.00127864		22.8502	0.433213	0.105359	0.000639249	0.573328
WC-1 - 11		2023-03-02 14:38:59	38.012	110	83489.2	1289.69	9602.22	360.385	1.83913e+06	24360.7	0.0473469	0.000659512	0.11603	0.00385481		22.9006	0.457454	0.115077	0.00192741	0.338791
WC-1 - 12		2023-03-02 14:40:36	36.5239	110	85049.5	481.298	13436.8	154.143	1.62136e+06	9121.63	0.0544805	0.000322018	0.158219	0.00162485		19.9009	0.377202	0.158079	0.000812428	0.446199	x
WC-1 - 13		2023-03-02 15:29:08	38.005	110	77887.7	687.375	8929.85	242.234	1.70502e+06	14806.3	0.0474524	0.000317024	0.115175	0.00245534		22.7967	0.433545	0.114716	0.00122766	0.825548
WC-1 - 14		2023-03-02 15:30:44	38.017	110	51796.7	481.023	6484.98	140.763	1.1039e+06	6432.19	0.0488449	0.000355542	0.125005	0.0023269		22.1448	0.422361	0.125272	0.00116343	0.0299269
WC-1 - 15		2023-03-02 16:20:50	36.9783	110	91621.2	547.569	11949.4	109.08	2.10197e+06	20172.7	0.0453068	0.000222137	0.130161	0.00104526		23.8019	0.449427	0.130497	0.000522587	0.11852
WC-1 - 16		2023-03-02 16:22:25	38.006	110	82393.7	460.882	8674.15	102.076	1.82659e+06	16537.3	0.0469664	0.000233436	0.105348	0.0012242		22.9586	0.433605	0.105337	0.00061205	0.0847412
WC-1 - 17		2023-03-02 17:13:01	38.003	110	61175.1	365.999	7214.41	128.811	1.33005e+06	11380.6	0.0478964	0.000253683	0.118004	0.00222895		22.4492	0.424482	0.117998	0.00111034	0.139594
WC-1 - 18		2023-03-02 17:14:30	38.003	110	80205.6	1079.26	6501.68	108.732	1.86932e+06	31109.7	0.0446707	0.000196904	0.0814712	0.000996557		24.0685	0.453728	0.0811092	0.000498379	0.268238
WC-1 - 19		2023-03-02 18:02:58	38.1	110	79695.9	532.881	8683.43	138.554	1.73248e+06	13148.3	0.0478216	0.000280977	0.108644	0.00134985		22.4415	0.425295	0.109019	0.000675065	0.389733
WC-1 - 20		2023-03-02 18:04:27	38.006	110	74564	568.413	8798.59	104.524	1.6189e+06	20332	0.0480183	0.000252571	0.118419	0.00136074		22.3487	0.422525	0.118068	0.000680497	0.0980688
WC-1 - 21		2023-03-02 18:54:33	38.004	110	68747.5	357.982	9012.24	123.399	1.48093e+06	11728.5	0.0482822	0.00027153	0.131296	0.00156313		22.2095	0.420474	0.131167	0.000781439	0.373562
WC-1 - 22		2023-03-02 18:56:09	38.004	110	56808.3	386.047	5459.47	74.2983	1.25845e+06	13254	0.0470494	0.000238402	0.0965056	0.00121564		22.7912	0.430591	0.0961585	0.000607722	0.294567
WC-1 - 23		2023-03-02 19:46:09	13.5103	110	86858.5	675.542	10259.1	179.692	2.01183e+06	15241.8	0.0465991	0.000371179	0.118261	0.00232716		23.0093	0.440425	0.11818	0.00113179	0.414896
WC-1 - 24		2023-03-02 19:46:24	7.41065	110	100119	2953.44	22504.1	2395.4	1.8602e+06	15039.9	0.0551041	0.00163212	0.220074	0.0172279		19.4579	0.464487	0.224902	0.00861283	0.915703
WC-1 - 25		2023-03-02 19:46:34	12.8363	110	80225.8	562.469	9119.19	133.625	1.73563e+06	14543.6	0.0467847	0.000362726	0.113726	0.00168745		22.9181	0.438178	0.113734	0.000843617	0.38182
WC-1 - 26		2023-03-02 19:47:45	38.008	110	69730.7	504.594	10118.7	107.985	1.47353e+06	15868	0.04933	0.000252373	0.14503	0.00144625		21.7354	0.410716	0.145194	0.000723031	0.188621
WC-1 - 27		2023-03-02 20:36:11	38.004	110	43537.2	373.385	4802.96	91.6835	986914	10886.8	0.0459018	0.000251961	0.110037	0.00187364		23.3412	0.441669	0.110382	0.000936781	0.191286
WC-1 - 28		2023-03-02 20:37:39	38.004	110	58731.2	760.518	7177.9	196.263	1.27358e+06	17424.1	0.0479273	0.000313418	0.122734	0.00258796		22.3535	0.424841	0.122286	0.00129394	0.560003
WC-1 - 29		2023-03-02 21:27:38	38.014	110	70471.5	498.032	6924.03	96.7568	1.68543e+06	15958.2	0.043434	0.000180777	0.0984449	0.00112916		24.5695	0.462829	0.0983092	0.000564682	-0.0216852
WC-1 - 30		2023-03-02 21:29:07	38.005	110	87598.6	553.396	9429.99	164.802	1.94301e+06	11131	0.0468204	0.00021222	0.108621	0.00170307		22.788	0.429756	0.107712	0.000851692	0.486438
WC-1 - 31		2023-03-02 22:16:27	37.7273	110	54301.5	340.98	6709.22	95.8766	1.25731e+06	7739.73	0.044936	0.000222061	0.123786	0.00172087		23.5029	0.443841	0.123626	0.000860477	0.329031
WC-1 - 32		2023-03-02 22:18:03	38.094	110	29958.6	472.318	4102.35	84.4479	637341	7431.68	0.0488212	0.000367099	0.137791	0.00251612		21.6217	0.412887	0.137012	0.00125811	0.379888
C_RA138
RA138 - 1		2023-03-15 17:15:16	39.2583	110	133391	794.661	22055.8	310.781	2.34738e+06	16548.8	0.0582544	0.000328292	0.165517	0.00187243		17.1472	0.387645	0.165362	0.000936137	-0.0601545
RA138 - 2		2023-03-15 17:16:45	36.504	110	140946	982.04	32505.2	539.095	2.25047e+06	16825.4	0.0639912	0.000396331	0.229875	0.00283657		15.6171	0.353623	0.230642	0.00141818	-0.495989
RA138 - 3		2023-03-15 18:16:27	38.2043	110	131052	662.901	26809.5	468.898	2.17194e+06	18848	0.0617606	0.000483869	0.204159	0.00278283		16.4035	0.37351	0.204589	0.00139159	-0.411895
RA138 - 4		2023-03-15 18:17:55	41.5001	110	146185	1747.17	33957.3	615.364	2.31325e+06	32689.3	0.0647875	0.000462359	0.232499	0.00275687		15.6408	0.355243	0.23231	0.00137861	-0.162146
RA138 - 5		2023-03-15 19:17:45	38.8428	110	155813	1542.67	36716.7	819.319	2.40757e+06	24334.8	0.0659946	0.000453749	0.233707	0.00359663		15.4484	0.350562	0.235666	0.00179879	-0.172509
RA138 - 6		2023-03-15 19:19:13	37.2748	110	150006	1276.09	34820.1	817.712	2.31535e+06	17757.3	0.0662737	0.00054698	0.232083	0.00408325		15.3845	0.350876	0.232145	0.00204214	-0.666965
RA138 - 7		2023-03-15 20:19:02	40.0617	110	167518	9480.42	50430.9	4639.32	2.35461e+06	117403	0.0720518	0.00151797	0.272613	0.0107367		14.1675	0.351084	0.301074	0.00536745	-0.676238
RA138 - 8		2023-03-15 20:20:30	41.8901	110	86377.5	2348.45	17055.1	417.505	1.44384e+06	49475.9	0.0619341	0.000826657	0.200382	0.0076049		16.4817	0.385711	0.197466	0.00361182	-0.551441
RA138 - 9		2023-03-15 21:20:23	39.5309	110	84617.8	919.725	15062.6	313.384	1.41727e+06	12437.2	0.0612904	0.000452496	0.177883	0.00279988		16.628	0.377993	0.178023	0.00139973	-0.0046383
RA138 - 10		2023-03-15 21:21:52	37.4933	110	133398	1735.21	33117.5	820.729	1.981e+06	25337.6	0.0691463	0.000841015	0.251829	0.00445713		14.738	0.342516	0.248282	0.00222824	-0.455371
RA138 - 11		2023-03-15 22:19:54	36.503	110	63601.9	1004.97	10149.5	352.821	1.14092e+06	17322.5	0.0569868	0.000967817	0.160683	0.00632074		17.8345	0.427744	0.159592	0.00304675	0.0779018
RA138 - 12		2023-03-15 22:21:22	38.4501	110	86419.5	1115.45	15155.6	525.095	1.46534e+06	16242.4	0.0607235	0.000730434	0.173563	0.00430318		16.7358	0.388654	0.175389	0.00215197	-0.262241
RA138 - 13		2023-03-15 23:21:17	38.3204	110	143256	1297.71	31773.9	620.81	2.29286e+06	18067.9	0.063958	0.000417415	0.219386	0.00281778		15.8446	0.359145	0.221818	0.00140877	-0.0882256
RA138 - 14		2023-03-15 23:22:45	36.505	110	142525	874.605	27684.3	514.344	2.43593e+06	17188	0.0599748	0.000412712	0.193159	0.00280369		16.8958	0.383416	0.194259	0.00140172	-0.301292
RA138 - 15		2023-03-16 00:22:37	36.505	110	138968	809.611	29712	429.03	2.26887e+06	16612.2	0.0626745	0.000473153	0.213724	0.00299965		16.133	0.366961	0.213824	0.00149971	-0.143816
RA138 - 16		2023-03-16 00:24:05	37.32	110	133717	1959.9	34810.6	1323.68	2.02567e+06	19812.7	0.0681922	0.000959189	0.262119	0.00715902		14.827	0.348543	0.260353	0.00357924	-0.744429
RA138 - 17		2023-03-16 01:24:06	24.0294	110	116732	1783.65	36642.8	945.94	1.58536e+06	23937.9	0.0749075	0.000685756	0.312359	0.00445056		13.4805	0.308606	0.313933	0.00222533	-0.00445334
RA138 - 18		2023-03-16 01:25:31	39.6281	110	128042	1780.27	40733	1165.06	1.72265e+06	28055.3	0.0765156	0.0009795	0.317966	0.00540296		13.1969	0.307829	0.318149	0.00270156	-0.287909
RA138 - 19		2023-03-16 02:23:55	40.3538	110	130328	1109.25	26591.5	386.27	2.11483e+06	17100.3	0.0636009	0.0005321	0.204427	0.00255753		15.8667	0.362036	0.204053	0.00127867	0.195614
RA138 - 20		2023-03-16 02:25:23	40.8014	110	140873	1238.27	33871.1	732.409	2.16112e+06	28632.6	0.0673574	0.000680817	0.242511	0.0043632		14.9816	0.344471	0.240458	0.00218142	-0.393962
RA138 - 21		2023-03-16 03:25:18	38.8419	110	141300	1586.75	34812.4	873.351	2.19352e+06	21251.9	0.0659112	0.000590031	0.244805	0.00367865		15.2997	0.349947	0.246394	0.00183929	-0.252181
RA138 - 22		2023-03-16 03:26:46	39.4967	110	119161	1308.1	25039.4	510.958	1.94975e+06	27046	0.0625414	0.000509683	0.209769	0.00312269		16.1236	0.367582	0.21015	0.00156134	0.222356
RA138 - 23		2023-03-16 04:26:54	36.6529	110	134004	1220.35	32578.2	420.43	2.07076e+06	22929.9	0.0661171	0.000595533	0.242909	0.00246411		15.2219	0.348251	0.243135	0.00123233	0.0638828
RA138 - 24		2023-03-16 04:28:20	37.1877	110	132710	1057.13	33846.1	586.797	2.04616e+06	17469.1	0.0663551	0.000452469	0.254455	0.00307054		15.1662	0.344094	0.25506	0.00153562	-0.151997
RA138 - 25		2023-03-16 05:28:26	39.4831	110	133166	1274.93	32969.4	696.402	2.04533e+06	17818.5	0.0668165	0.000592949	0.246014	0.00369032		14.9879	0.342702	0.247603	0.00184516	-0.0792248
RA138 - 26		2023-03-16 05:30:00	34.1408	110	102598	1677.67	26070.9	673.187	1.51212e+06	28949.2	0.0694684	0.000890792	0.25573	0.00396913		14.4131	0.336242	0.254129	0.00198454	-0.224808
RA138 - 27		2023-03-16 06:30:12	38.8302	110	124223	1004.45	27837.8	581.822	2.00306e+06	21529.7	0.0637639	0.000554115	0.224945	0.0037211		15.5443	0.355149	0.224115	0.0018602	-0.521353
RA138 - 28		2023-03-16 06:31:42	38.4954	110	118203	1123.1	26000.5	498.351	1.92476e+06	22296.2	0.0628794	0.00044753	0.217831	0.00248545		15.7576	0.357874	0.219986	0.00124249	-0.0349477
RA138 - 29		2023-03-16 07:18:21	35.1287	110	113403	593.526	21412.9	303.732	1.98322e+06	9405.76	0.0587076	0.000328245	0.188647	0.00236088		16.6546	0.376464	0.188838	0.0011804	-0.0858983
RA138 - 30		2023-03-16 07:19:49	40.8326	110	117165	1020.96	20617	302.891	2.07146e+06	23833.3	0.0580479	0.000324454	0.175298	0.00169613		16.8352	0.380544	0.17598	0.000848047	0.0476573
C_WC1
WC-1 - 1		2023-03-15 17:12:17	36.505	110	60632.2	342.667	8206.52	138.001	1.3422e+06	6854.3	0.0461304	0.000337547	0.135301	0.0022081		21.6333	0.49166	0.135361	0.00110394	-0.185776
WC-1 - 2		2023-03-15 17:13:44	34.8821	110	73482.9	1071.1	10824.7	298.495	1.57103e+06	28298.7	0.0479667	0.000524256	0.146948	0.00302716		20.8148	0.480546	0.147322	0.00151345	-0.248551
WC-1 - 3		2023-03-15 18:13:27	36.503	110	44195.4	295.254	5768.31	96.2095	984544	7566.77	0.0458652	0.000308282	0.130272	0.00205772		22.0778	0.500745	0.13053	0.00102896	0.220648
WC-1 - 4		2023-03-15 18:14:55	36.506	110	56431.3	288.798	7852.52	109.04	1.23503e+06	8682.82	0.0467937	0.000332511	0.13876	0.00178766		21.6449	0.49156	0.139164	0.000893928	-0.0815799
WC-1 - 5		2023-03-15 19:14:45	36.505	110	85717	450.119	11596.4	102.838	1.85117e+06	13115.5	0.047398	0.000266479	0.13554	0.00126758		21.5059	0.486163	0.135299	0.000633964	0.187011
WC-1 - 6		2023-03-15 19:16:13	36.506	110	68142.2	374.557	8853.8	124.279	1.50717e+06	8185.38	0.046157	0.000355252	0.129747	0.00191668		22.086	0.502639	0.129943	0.000958597	0.171251
WC-1 - 7		2023-03-15 20:16:02	36.504	110	64475.7	776.075	9211.25	252.751	1.43191e+06	12589.2	0.0458803	0.000382913	0.141702	0.00265666		22.2495	0.507633	0.142877	0.00132813	-0.236337
WC-1 - 8		2023-03-15 20:17:30	36.504	110	82102.5	452.039	10944.3	169.172	1.79139e+06	9189.79	0.046802	0.000292729	0.133539	0.00196463		21.8112	0.493969	0.133312	0.00098216	-0.0459265
WC-1 - 9		2023-03-15 21:17:24	36.506	110	55018.9	757.23	7506	144.601	1.25148e+06	20875	0.0450096	0.000379422	0.136592	0.00197585		22.6453	0.516838	0.136438	0.000987756	0.150257
WC-1 - 10		2023-03-15 21:18:52	36.504	110	42236.1	790.81	6050.13	174.712	899377	15863.3	0.0480479	0.00052147	0.141897	0.00255229		21.2121	0.489527	0.143258	0.00127594	-0.0577608
WC-1 - 11		2023-03-15 22:16:54	36.506	110	65408	402.14	9893.84	202.14	1.41004e+06	7848.16	0.0474047	0.00039353	0.150882	0.00315398		21.4426	0.489136	0.151277	0.00157727	-0.266382
WC-1 - 12		2023-03-15 22:18:22	36.503	110	94162.9	517.367	10781.9	147.721	2.20885e+06	15686.6	0.0436098	0.000285077	0.114492	0.00149987		23.3068	0.528307	0.114512	0.00075007	-0.0242303
WC-1 - 13		2023-03-15 23:18:16	36.514	110	84829.9	653.82	9828.91	166.713	1.99299e+06	20625.8	0.0435815	0.000270471	0.115739	0.00153831		23.2557	0.526608	0.115876	0.000769099	0.0951875
WC-1 - 14		2023-03-15 23:19:44	36.506	110	76095.8	655.29	8233.84	133.73	1.80541e+06	18357.8	0.0430925	0.000265143	0.107959	0.00147589		23.5181	0.532464	0.108213	0.000737887	0.127796
WC-1 - 15		2023-03-16 00:21:05	36.506	110	107031	2072.5	17125.1	546.578	2.32409e+06	56383.5	0.0472094	0.000295719	0.158737	0.00243097		21.4189	0.485099	0.160016	0.00121539	-0.0295891
WC-1 - 16		2023-03-16 02:22:25	36.505	110	89935.6	577.098	13054.7	203.98	1.7932e+06	16203.9	0.0514325	0.00037418	0.144978	0.00216955		19.6209	0.445857	0.145169	0.00108471	0.0202393
WC-1 - 17		2023-03-16 03:22:18	36.506	110	78400.6	593.408	8496.27	109.365	1.82012e+06	13415.1	0.0441141	0.000331791	0.108492	0.00165578		22.8606	0.519932	0.10838	0.000809118	0.0906462
WC-1 - 18		2023-03-16 03:23:46	36.512	110	44535.7	670.104	7862.02	181.199	855595	9711.27	0.0529087	0.000972365	0.175865	0.00311681		19.0602	0.462016	0.176549	0.00155837	-0.189692
WC-1 - 19		2023-03-16 04:23:52	36.503	110	60692.4	501.138	8918.07	263.909	1.38284e+06	8769.27	0.0446817	0.000462369	0.147119	0.00374904		22.5278	0.518581	0.146952	0.00187495	-0.574589
WC-1 - 20		2023-03-16 04:25:20	36.504	110	50036.4	699.068	7350.93	168.549	1.13994e+06	12172.8	0.0448659	0.000446154	0.146377	0.00255691		22.4337	0.515416	0.146925	0.00127875	0.08286
WC-1 - 21		2023-03-16 05:26:55	36.503	110	75712.6	1865.49	21167.2	748.171	1.32704e+06	24665.5	0.0585659	0.00138974	0.276813	0.00463459		17.1023	0.433976	0.279597	0.00231729	-0.775884
WC-1 - 22		2023-03-16 06:27:14	36.514	110	129202	2203.4	32263.2	970.481	2.44765e+06	22716.4	0.0539481	0.00106704	0.247315	0.00396868		18.3847	0.450682	0.249733	0.00198397	-0.622089
WC-1 - 23		2023-03-16 06:28:42	36.504	110	67948.5	441.679	10615.4	138.061	1.4793e+06	14749.3	0.0468728	0.000362799	0.157179	0.00177536		21.153	0.481484	0.15624	0.000887515	0.0951342
WC-1 - 24		2023-03-16 07:15:22	36.507	110	61202.7	499.884	8421.04	166.338	1.40483e+06	10783	0.0445147	0.000405861	0.137314	0.00250539		21.9871	0.503267	0.137605	0.00125264	-0.00312106
WC-1 - 25		2023-03-16 07:16:50	36.501	110	77485	792.964	11821	190.227	1.89058e+06	20915.4	0.0419621	0.000324188	0.152545	0.00201246		23.313	0.530623	0.152572	0.0010062	-0.106772
C_RA138
RA138 - 1		2023-03-24 16:28:18	38.003	110	67077.3	695.395	14118	352.871	1.12246e+06	9589.53	0.0572837	0.000526892	0.211954	0.00412928		16.113	0.474268	0.210502	0.00206447	-0.714562
RA138 - 2		2023-03-24 16:29:52	38.006	110	70254.2	599.286	12707.2	293.964	1.24508e+06	12558.2	0.0538985	0.000331923	0.180364	0.00329912		17.096	0.499801	0.180899	0.00164944	-0.547199
RA138 - 3		2023-03-24 17:34:00	38.02	110	80150.3	951.131	16969	548.149	1.27762e+06	10749.6	0.059886	0.000482097	0.210527	0.00448656		14.8598	0.436132	0.211743	0.0022437	-0.818123
RA138 - 4		2023-03-24 17:35:34	38.005	110	73151.1	506.249	11237.5	167.903	1.2825e+06	10870.7	0.0545596	0.0003014	0.153724	0.00201288		16.3077	0.476239	0.15364	0.00100663	-0.0809624
RA138 - 5		2023-03-24 18:39:45	38.004	110	76176.9	610.246	15363.9	330.519	1.25424e+06	12222	0.0580441	0.000367092	0.201887	0.00349141		15.4594	0.452094	0.201714	0.00174595	-0.599996
RA138 - 6		2023-03-24 18:41:19	38.007	110	73695.7	686.639	14583.8	345.794	1.23778e+06	11156.7	0.0570262	0.000367946	0.196034	0.00348038		15.7425	0.460482	0.197919	0.00174043	-0.454248
RA138 - 7		2023-03-24 19:43:43	38.004	110	81763.6	1010.98	16820.2	595.802	1.22134e+06	10983.9	0.0639549	0.000709985	0.203146	0.00531423		14.3203	0.423845	0.205745	0.00265733	-0.73367	x
RA138 - 8		2023-03-24 19:45:17	38.004	110	84820.8	639.785	15601.9	339.984	1.3168e+06	10539.2	0.0615041	0.00048979	0.184147	0.00324178		14.898	0.437165	0.183965	0.00162103	-0.428437
RA138 - 9		2023-03-24 20:49:24	38.004	110	81715.3	545.658	14613.6	250.447	1.34302e+06	9575.9	0.0581882	0.000341012	0.179079	0.00267038		15.9825	0.467004	0.17886	0.00133532	-0.0713158
RA138 - 10		2023-03-24 20:50:58	38.004	110	79312.6	689.581	14088.1	338.258	1.32422e+06	12217.8	0.0573619	0.00039195	0.17697	0.00317424		16.2163	0.47469	0.177651	0.00158728	-0.390338
RA138 - 11		2023-03-24 21:53:24	38.004	110	79373.5	887.043	14703.1	498.824	1.21285e+06	9247.94	0.0625873	0.000546484	0.183221	0.00449402		14.8958	0.437912	0.185264	0.00224696	-0.686947
RA138 - 12		2023-03-24 21:54:59	38.005	110	76626.7	436.439	11667.2	279.42	1.23436e+06	10188	0.0595209	0.000503746	0.151786	0.00333024		15.6616	0.460117	0.15228	0.00166506	-0.334509	x
RA138 - 13		2023-03-24 22:59:12	38.006	110	77980.1	639.137	17329.7	258.398	1.21248e+06	11842.7	0.0615187	0.000390704	0.223315	0.00261878		15.0041	0.438799	0.222261	0.00130886	-0.235874
RA138 - 14		2023-03-24 23:00:46	38.003	110	83952.7	885.916	18541.1	553.663	1.31658e+06	11024.6	0.0609571	0.000641721	0.219553	0.00463863		15.1369	0.447221	0.220881	0.00231837	-0.59849
RA138 - 15		2023-03-25 00:05:22	38.004	110	75159.6	667.884	12290.2	290.17	1.33372e+06	11975.3	0.0539608	0.000393272	0.163246	0.00288961		16.8094	0.492513	0.163543	0.00144473	-0.285568
RA138 - 16		2023-03-25 00:06:56	38.006	110	77049.2	868.446	11487.8	264.669	1.40528e+06	18134.8	0.0526506	0.000380303	0.149063	0.00250323		17.2201	0.504479	0.149116	0.00125158	-0.0547153
RA138 - 17		2023-03-25 01:09:28	38.004	110	76130.2	686.956	13260.9	328.341	1.3371e+06	13950.8	0.0544816	0.000414624	0.176436	0.00401975		16.3833	0.480366	0.17421	0.00201056	-0.483161
RA138 - 18		2023-03-25 01:11:02	38.006	110	40200.2	621.519	7858.4	242.877	672297	10780.7	0.0574308	0.000545157	0.195823	0.00418232		15.5372	0.457684	0.195508	0.00209187	-0.199919
RA138 - 19		2023-03-25 02:15:29	38.017	110	77055.9	1272.37	17049.5	769.909	1.3016e+06	23215.1	0.0569619	0.000581744	0.217111	0.00702488		15.5631	0.459382	0.221291	0.00351273	-0.301544
RA138 - 20		2023-03-25 02:17:03	38.012	110	73623.4	553.501	14640.1	276.118	1.23142e+06	8113.79	0.0571351	0.000415775	0.19911	0.00304311		15.5162	0.454612	0.198877	0.00152167	-0.386465
RA138 - 21		2023-03-25 03:19:32	38.014	110	64951.7	682.721	11597.8	347.867	1.12394e+06	9285.52	0.0552996	0.000493236	0.176949	0.00398637		16.1735	0.475703	0.178584	0.00199312	-0.493848
RA138 - 22		2023-03-25 03:21:06	38.006	110	73354.7	494.461	12457.5	245.352	1.29412e+06	12444.4	0.0543082	0.000417023	0.16996	0.00304663		16.4758	0.48315	0.169849	0.00152326	-0.163193
RA138 - 23		2023-03-25 04:25:27	38.004	110	67864.4	511.286	12260.3	307.776	1.17111e+06	12365.5	0.0553253	0.000477787	0.180208	0.00373813		16.5839	0.487422	0.180683	0.00186909	0.270695
RA138 - 24		2023-03-25 04:27:01	38.018	110	71821.8	793.683	13764.1	384.517	1.21642e+06	12140	0.0567293	0.000549145	0.190491	0.00377427		16.1858	0.477036	0.191668	0.00188717	-0.256945
RA138 - 25		2023-03-25 05:31:34	38.006	110	67958.2	628.031	11080.9	187.949	1.19375e+06	14822.2	0.0547675	0.000431089	0.163302	0.00249558		17.3391	0.508686	0.163076	0.0012478	-0.212391
RA138 - 26		2023-03-25 05:33:08	38.004	110	71144.5	597.676	14027.1	240.208	1.19286e+06	11395.9	0.0570697	0.0003307	0.19743	0.00250177		16.6529	0.486538	0.19719	0.00125089	-0.0857626
RA138 - 27		2023-03-25 06:35:48	38.004	110	64465.6	442.65	9248.97	116.352	1.14035e+06	9763.32	0.0542056	0.000253863	0.143358	0.00169978		17.9691	0.524098	0.14349	0.000849796	0.154743
RA138 - 28		2023-03-25 06:37:22	38.01	110	71881.7	606.412	10864.8	188.424	1.27056e+06	12809.8	0.0541997	0.000268823	0.150503	0.00185629		17.9769	0.52453	0.151169	0.000928044	-0.0142812
RA138 - 29		2023-03-25 07:42:07	38.008	110	66465.9	714.952	10937.5	240.879	1.17535e+06	14296.1	0.0541406	0.0003753	0.164154	0.00272467		17.811	0.521475	0.16458	0.00136235	-0.10825
RA138 - 30		2023-03-25 07:43:42	38.026	110	71868.5	770.286	15298.4	450.227	1.18634e+06	11927.7	0.0580607	0.000611473	0.213492	0.00459007		16.5916	0.490205	0.212895	0.00229506	-0.849065
C_WC1
WC-1 - 1		2023-03-24 16:31:37	36.504	110	43396.1	257.19	6250.21	74.658	1.03589e+06	5045.32	0.040011	0.000234276	0.144207	0.00175028		22.9873	0.671675	0.144046	0.000875086	0.346957
WC-1 - 2		2023-03-24 16:33:11	36.515	110	32868.1	329.628	6409.54	97.3192	702640	11361.7	0.0449487	0.000405438	0.195611	0.00271915		20.4295	0.601037	0.195034	0.00135952	0.0249156
WC-1 - 3		2023-03-24 17:37:19	36.504	110	43213.7	299.858	6534.26	81.0605	957302	10430.7	0.0433088	0.000280817	0.151556	0.00215726		20.5408	0.600871	0.151228	0.00107465	0.142327
WC-1 - 4		2023-03-24 17:38:53	36.504	110	50053.1	365.336	6043.92	89.5625	1.20526e+06	8619.31	0.0396918	0.000253977	0.12095	0.00158466		22.4099	0.655442	0.120766	0.000792484	0.00102775
WC-1 - 5		2023-03-24 18:43:04	36.53	110	58111	330.644	7390.96	97.1029	1.3531e+06	13290.6	0.0411144	0.000241196	0.126774	0.0014269		21.8464	0.638352	0.127204	0.000713541	0.115136
WC-1 - 6		2023-03-24 18:44:38	36.509	110	50553.2	344.755	6960.6	140.788	1.16305e+06	7852.42	0.0415416	0.000346648	0.13709	0.00226139		21.6318	0.635331	0.137707	0.00113084	-0.342062
WC-1 - 7		2023-03-24 19:47:03	36.512	110	37048.8	1416.57	6695.4	291.321	664708	4356.69	0.0531036	0.00202804	0.18154	0.00283179		17.264	0.600487	0.180742	0.00141601	-0.295754	x
WC-1 - 8		2023-03-24 19:48:36	36.504	110	49585.8	356.586	8096.6	117.019	975463	4934.25	0.04856	0.00036096	0.162837	0.00203371		18.8883	0.553596	0.163306	0.00101695	-0.121268
WC-1 - 9		2023-03-24 20:52:44	36.509	110	41689	474.49	7477.96	126.086	843030	10218.4	0.0473699	0.000359328	0.17855	0.00188449		19.6415	0.575865	0.179399	0.000942339	0.175932
WC-1 - 10		2023-03-24 20:54:18	36.508	110	57675.5	322.81	8281.22	88.1789	1.33766e+06	11046.8	0.0412554	0.000241926	0.143549	0.00145195		22.5572	0.659117	0.143602	0.000726049	0.210468
WC-1 - 11		2023-03-24 21:56:44	36.506	110	51262.3	337.322	8626.69	96.8686	1.00808e+06	8879.81	0.0486007	0.00031845	0.168654	0.00201266		19.1782	0.561085	0.168307	0.00100628	0.0768798
WC-1 - 12		2023-03-24 21:58:18	36.51	110	30218.5	236.773	6413.18	127.083	558150	3468.15	0.0516094	0.000428787	0.211916	0.00391917		18.058	0.530323	0.212255	0.00195949	0.085613
WC-1 - 13		2023-03-24 23:02:32	36.505	110	44061.3	374.947	7077.8	129.585	981396	7111.83	0.0428756	0.000317316	0.160524	0.00233333		21.5117	0.630444	0.160657	0.00116619	-0.146828
WC-1 - 14		2023-03-24 23:04:06	36.505	110	52406.5	308.92	7619.18	98.941	1.16188e+06	6417.48	0.0430163	0.000239445	0.145686	0.00171517		21.4335	0.625973	0.145405	0.000857235	0.0991571
WC-1 - 15		2023-03-25 00:08:42	36.506	110	36723.2	226.944	6664.84	102.635	782349	4354.13	0.0448962	0.000348238	0.18155	0.00280097		20.1844	0.592008	0.181513	0.00140047	0.0293305
WC-1 - 16		2023-03-25 00:10:16	36.506	110	39146.1	408.727	7884.92	118.465	779486	8361.03	0.0481272	0.000444994	0.20175	0.00271426		18.8211	0.554051	0.20145	0.00135715	0.134622
WC-1 - 17		2023-03-25 01:12:48	36.504	110	38390.4	327.972	6377.79	119.505	848432	6534.93	0.0431924	0.000423081	0.166841	0.00260916		20.652	0.608864	0.166152	0.00130502	-0.301862
WC-1 - 18		2023-03-25 01:14:22	36.504	110	54778.4	310.517	7473.14	92.6463	1.39912e+06	8366.44	0.0374237	0.00022556	0.136497	0.00157872		23.8284	0.69646	0.136443	0.000789621	0.0205092
WC-1 - 19		2023-03-25 02:18:49	36.504	110	65314.8	388.159	6902.05	92.9754	1.62156e+06	9676.4	0.038496	0.000187855	0.105744	0.00123406		23.0296	0.671879	0.105688	0.000617076	0.0104486
WC-1 - 20		2023-03-25 02:20:23	36.504	110	51882.9	283.14	6815.95	81.7358	1.23363e+06	9531.85	0.0402357	0.000251275	0.131345	0.00165288		22.0347	0.644287	0.131389	0.000826497	0.18491
WC-1 - 21		2023-03-25 03:22:52	36.504	110	35023.3	532.783	5481.88	90.0866	794641	16286.2	0.0423724	0.000293074	0.157204	0.00247895		21.1272	0.61855	0.156542	0.00123943	-0.0572363
WC-1 - 22		2023-03-25 03:24:26	36.504	110	45381.7	311.863	6521.05	85.807	1.02781e+06	5258.08	0.0421208	0.000262039	0.144213	0.0021181		21.2629	0.621692	0.143712	0.00105901	0.137009
WC-1 - 23		2023-03-25 04:28:47	36.504	110	54389.6	266.354	5589.36	79.4533	1.32461e+06	8909.46	0.0392533	0.000216503	0.102852	0.00141871		23.4121	0.683702	0.102779	0.000709367	0.0519174
WC-1 - 24		2023-03-25 04:30:21	36.504	110	48606.8	308.013	6683.21	100.811	1.1132e+06	7989.76	0.0416631	0.000259946	0.137415	0.00180198		22.075	0.645459	0.137514	0.000901007	0.0269181
WC-1 - 25		2023-03-25 05:34:54	36.504	110	32482.8	231.213	6168.37	90.6742	733425	4389.55	0.0423968	0.000299914	0.189683	0.00259134		22.4363	0.657086	0.189922	0.00129567	0.224297
WC-1 - 26		2023-03-25 05:36:28	36.52	110	53620.7	527.485	7383.82	129.156	1.28067e+06	15906.5	0.0400958	0.000324047	0.137598	0.00187577		23.7426	0.696889	0.137723	0.00093788	0.121017
WC-1 - 27		2023-03-25 06:39:07	36.505	110	32415	349.172	5648.66	99.5765	683790	3935.94	0.0452854	0.000380238	0.174007	0.00222172		21.523	0.632215	0.174284	0.00111074	0.00595446
WC-1 - 28		2023-03-25 06:40:41	36.508	110	48835.3	460.746	7519.82	159.458	1.0856e+06	10026.2	0.0431076	0.000289808	0.153253	0.00275676		22.6166	0.6619	0.154004	0.00137823	0.130585
WC-1 - 29		2023-03-25 07:45:27	36.506	110	46581.4	334.272	6764.17	90.2746	1.12662e+06	8999.73	0.0395439	0.000205263	0.145618	0.00176903		24.3316	0.71019	0.145231	0.000884526	0.224018
WC-1 - 30		2023-03-25 07:47:01	36.504	110	52482.3	308.027	6671.38	87.1684	1.27503e+06	10935.1	0.0394502	0.000260005	0.127959	0.00170175		24.3622	0.712804	0.127134	0.00085089	-0.018135
C_RA138
RA138_001		2023-04-13 15:53:37	36.505	110	73100.7	701.621	12844.8	272.066	1.36448e+06	17767.3	0.0593125	0.000347951	0.17537	0.00271027		17.098	0.29424	0.175744	0.00135498	-0.00163491
RA138_002		2023-04-13 15:55:08	36.508	110	68703	458.68	9128.03	148.706	1.36048e+06	10932.7	0.0558688	0.000287597	0.132744	0.00180602		18.1528	0.311347	0.132885	0.000902913	0.026512
RA138_003		2023-04-13 16:48:08	36.504	110	74868	460.939	10967.5	157.453	1.45065e+06	12865.5	0.0571181	0.0003384	0.146411	0.001765		17.7864	0.306175	0.146516	0.000882596	-0.135108
RA138_004		2023-04-13 16:49:39	36.506	110	75391.5	418.342	13827.9	222.704	1.37589e+06	7310.32	0.0605004	0.000328573	0.183296	0.00258821		16.7929	0.288388	0.183447	0.00129425	-0.346306
RA138_005		2023-04-13 17:42:54	36.505	110	32459.1	390.983	4888.05	79.6251	613107	11397.6	0.0587226	0.000502803	0.151056	0.00268944		17.3312	0.30311	0.150617	0.00134476	-0.135832
RA138_006		2023-04-13 17:44:25	36.512	110	65569.4	410.506	10590.1	192.344	1.23753e+06	9141.51	0.0585104	0.000342732	0.161214	0.0025443		17.3949	0.299336	0.161538	0.00127219	-0.145365
RA138_007		2023-04-13 18:37:37	36.518	110	73629.2	704.178	10439.1	170.775	1.41363e+06	18647.8	0.057696	0.000492295	0.141795	0.00194671		17.6708	0.308986	0.141804	0.000973346	0.148028
RA138_008		2023-04-13 18:39:08	36.511	110	72856.4	380.409	10773.8	137.191	1.40166e+06	9505.32	0.0575833	0.000405645	0.14782	0.00187594		17.7063	0.306658	0.147903	0.00093796	0.120368
RA138_009		2023-04-13 19:30:30	36.505	110	74578.9	773.394	12565.9	426.957	1.37394e+06	11745.5	0.0600011	0.000664537	0.169303	0.0046855		17.021	0.30363	0.16852	0.00234265	-0.691638
RA138_010		2023-04-13 19:32:02	36.503	110	73093.8	587.87	12600.4	257.869	1.34523e+06	10994	0.0601749	0.000558567	0.17188	0.00298589		16.9727	0.298395	0.172416	0.00149288	-0.128467
RA138_011		2023-04-13 20:24:57	36.516	110	77136	844.632	15421	351.453	1.35039e+06	16346.6	0.0633592	0.000572746	0.199564	0.00357966		16.1473	0.283372	0.199955	0.00178962	-0.0781494
RA138_012		2023-04-13 20:26:28	36.503	110	73091.9	612.043	11009.6	194.662	1.36552e+06	13112.2	0.0591122	0.000424225	0.150091	0.00207314		17.3082	0.299999	0.150652	0.00103645	0.128535
RA138_013		2023-04-13 21:19:26	36.51	110	72200.9	767.517	12543.6	282.952	1.30423e+06	13967	0.0611929	0.000574195	0.17521	0.00336635		16.7483	0.294674	0.173762	0.00168328	-0.218646
RA138_014		2023-04-13 21:20:57	36.516	110	73069.3	498.773	12000.1	185.895	1.353e+06	12838.4	0.0597527	0.000452384	0.164098	0.00222482		17.1528	0.298023	0.164257	0.0011125	-0.199444
RA138_015		2023-04-13 22:13:51	36.505	110	70917.4	481.505	12741	201.896	1.28358e+06	9349.8	0.0610947	0.000437281	0.179488	0.00248642		16.8046	0.291235	0.179691	0.00124343	-0.132482
RA138_016		2023-04-13 22:15:22	36.506	110	66831.3	862.529	12603.7	417.575	1.19569e+06	15546.5	0.061629	0.000683342	0.188207	0.00438531		16.6597	0.297217	0.188622	0.00219302	-0.644495
RA138_017		2023-04-13 23:06:47	36.504	110	77461.8	1516.69	16250.4	762.186	1.17905e+06	10662.3	0.0724798	0.00127206	0.207878	0.00665514		14.189	0.270915	0.209822	0.00332694	-0.263143	x
RA138_018		2023-04-13 23:08:18	36.524	110	77122.3	623.865	14182.6	270.953	1.37882e+06	11568.7	0.0617124	0.000487202	0.185413	0.00316903		16.6655	0.290156	0.183929	0.0015842	-0.366394
RA138_019		2023-04-14 00:01:45	36.506	110	73228.1	499.983	11119.5	132.1	1.38098e+06	11747.8	0.0586571	0.000358079	0.151488	0.00165904		17.5636	0.302617	0.151873	0.000829419	0.215055
RA138_020		2023-04-14 00:03:16	36.506	110	69776.1	558.809	11974	202.072	1.27605e+06	12763.2	0.0605387	0.000445264	0.170802	0.00224878		17.0186	0.295296	0.171635	0.00112425	0.11433
RA138_021		2023-04-14 00:56:36	36.505	110	76332.7	836.165	13384.4	408.3	1.36604e+06	12679	0.0616444	0.000630445	0.174718	0.00392264		16.7419	0.296522	0.175373	0.00196145	-0.235874
RA138_022		2023-04-14 00:58:07	36.504	110	77081.4	795.872	15585	340.834	1.33498e+06	14811.9	0.0637856	0.000715677	0.2022	0.00380285		16.1807	0.289004	0.202224	0.00190157	0.0405284
RA138_023		2023-04-14 01:51:26	36.506	110	67012.1	379.377	11015.7	148.744	1.23077e+06	6887.36	0.0599627	0.000520735	0.164618	0.00241979		17.2416	0.301802	0.164412	0.00120343	-0.0202599
RA138_024		2023-04-14 01:52:57	36.505	110	78495.1	532.375	13948.1	232.873	1.40854e+06	10582.7	0.0616246	0.000561735	0.178909	0.00277317		16.7774	0.294595	0.177724	0.00138675	-0.475594
RA138_025		2023-04-14 02:44:21	36.504	110	67597.2	562.115	10515.7	244.377	1.25569e+06	9805.05	0.0594434	0.000492585	0.156522	0.00298015		17.4216	0.304112	0.155591	0.0014901	-0.266938
RA138_026		2023-04-14 02:45:52	36.505	110	63691.5	587.449	12233.6	259.603	1.11886e+06	11040.6	0.0629891	0.000583072	0.193455	0.00336464		16.4417	0.289004	0.19211	0.00168235	-0.258821
RA138_027		2023-04-14 03:39:14	36.517	110	72913.7	486.399	12393.1	158.328	1.32921e+06	12011.4	0.0606045	0.000411961	0.170541	0.00217967		17.1177	0.296041	0.169998	0.00108979	0.0718291
RA138_028		2023-04-14 03:40:45	36.511	110	75271.5	634.387	15168.4	316.681	1.30446e+06	11156.3	0.0638315	0.000552579	0.202233	0.00347387		16.2531	0.284444	0.201551	0.00173686	-0.207343
RA138_029		2023-04-14 04:26:14	36.511	110	62984.4	444.118	9567.28	146.891	1.18611e+06	9250.2	0.0587133	0.000470558	0.151879	0.00206035		17.6955	0.308331	0.151925	0.00103009	0.0196843
RA138_030		2023-04-14 04:27:45	36.516	110	76071	498.594	13856.5	289.622	1.35569e+06	12118	0.0619488	0.000491126	0.182513	0.00341212		16.7721	0.292075	0.182183	0.00170593	-0.480133
C_WC1
WC-1_001		2023-04-13 15:56:49	36.506	110	61481.1	1090.54	7485.64	213.057	1.50726e+06	28816	0.0450965	0.000310098	0.122152	0.00212759		22.4902	0.389131	0.121776	0.0010637	-0.319488
WC-1_002		2023-04-13 15:58:20	36.504	110	67535.8	518.72	8102.21	106.934	1.68837e+06	12844.4	0.0441381	0.00026097	0.12021	0.00141311		22.9797	0.395549	0.11999	0.000706492	0.0238918
WC-1_003		2023-04-13 16:51:20	36.504	110	67235.2	353.469	9478.27	172.396	1.62039e+06	10673.4	0.0458524	0.000279291	0.140665	0.00236865		22.1587	0.381762	0.140996	0.00118446	-0.0318001
WC-1_004		2023-04-13 16:52:51	36.505	110	52479.5	318.273	5954.88	85.417	1.30297e+06	10223.5	0.0445362	0.000288625	0.113818	0.00170027		22.8147	0.393873	0.11349	0.000850235	0.189263
WC-1_005		2023-04-13 17:46:06	36.504	110	63165.7	447.856	8092.73	105.823	1.54899e+06	13336.3	0.0451296	0.000285718	0.128245	0.00155742		22.5536	0.389053	0.128141	0.000778732	0.059539
WC-1_006		2023-04-13 17:47:37	36.506	110	67536.9	396.085	8277.58	133.076	1.65962e+06	12475.9	0.0450988	0.000230302	0.122236	0.00169041		22.5701	0.387041	0.122585	0.000845228	-0.0141869
WC-1_007		2023-04-13 18:40:49	36.531	110	71479.9	540.882	9456.16	135.502	1.73375e+06	15605.7	0.0455643	0.000283855	0.132425	0.00183983		22.3781	0.385818	0.132314	0.000919907	0.0568534
WC-1_008		2023-04-13 18:42:20	36.505	110	62365.9	465.822	7595.9	121.092	1.51048e+06	10332.6	0.0456568	0.00030958	0.121705	0.00159781		22.3339	0.386215	0.121817	0.000798902	-0.0630112
WC-1_009		2023-04-13 19:33:43	36.503	110	54430.7	453.214	7143.97	123.202	1.2999e+06	12662.8	0.0462885	0.000301671	0.131509	0.00184804		22.0657	0.381018	0.131272	0.000923981	0.451865
WC-1_010		2023-04-13 19:35:14	36.503	110	53910.1	525.048	6036.33	157.323	1.33273e+06	14160.5	0.0446744	0.00032306	0.11183	0.00227203		22.864	0.396426	0.11199	0.00113596	-0.240304
WC-1_011		2023-04-13 20:28:09	36.506	110	64783.4	387.35	9676.98	114.127	1.45175e+06	9503.95	0.0491957	0.000345327	0.149613	0.00168797		20.7982	0.360155	0.1494	0.00084388	0.265992
WC-1_012		2023-04-13 20:29:40	36.504	110	65605.8	499.05	9607.87	113.192	1.48508e+06	18336.5	0.0489854	0.000306228	0.146657	0.00159488		20.8886	0.360179	0.146474	0.00079734	0.164646
WC-1_013		2023-04-13 21:22:38	36.504	110	116438	3266.28	31532.4	1431.74	1.54888e+06	11136.3	0.083088	0.00244411	0.26446	0.00545098		12.3361	0.276909	0.270855	0.00272572	-0.757918	x
WC-1_014		2023-04-13 21:24:09	36.503	110	54030.9	393.285	6464.71	107.584	1.31051e+06	11717.1	0.0457105	0.00025815	0.119673	0.00183165		22.4244	0.385492	0.119669	0.000915909	0.0939173
WC-1_015		2023-04-13 22:17:03	36.52	110	56322.8	384.273	6468.53	86.7932	1.42112e+06	16664.4	0.0438827	0.000301927	0.114751	0.001496		23.3982	0.404851	0.114867	0.00074812	0.217973
WC-1_016		2023-04-13 22:18:34	36.506	110	63277.6	388.786	7603.62	131.809	1.57147e+06	11849.5	0.0445675	0.000280376	0.120189	0.00198746		23.0398	0.397356	0.120184	0.000993875	-0.0191871
WC-1_017		2023-04-13 23:10:00	36.512	110	55267.1	481.286	7233.15	191.663	1.32846e+06	11322.8	0.0460652	0.000322312	0.129894	0.0027262		22.3276	0.386587	0.130899	0.00136283	-0.184726
WC-1_018		2023-04-13 23:11:31	36.505	110	62627.1	462.043	8001.08	112.446	1.45182e+06	13375.2	0.0475776	0.000321441	0.127698	0.00152235		21.6189	0.373799	0.12778	0.000761018	0.0138187
WC-1_019		2023-04-14 00:04:57	36.504	110	57566.5	457.777	7044.98	123.182	1.37249e+06	10771.4	0.0464077	0.000281817	0.121923	0.00168916		22.2019	0.382469	0.122401	0.000844483	0.127532
WC-1_020		2023-04-14 00:06:28	36.504	110	57885.6	452.839	6912.94	106.689	1.40044e+06	14449.1	0.0457676	0.000275037	0.119355	0.00172913		22.5135	0.387713	0.119445	0.000864472	0.102747
WC-1_021		2023-04-14 00:59:48	36.504	110	58603.8	397.368	7249.99	104.873	1.3991e+06	13115.5	0.0464477	0.000263092	0.123729	0.00154603		22.2217	0.382037	0.123733	0.000773078	0.113817
WC-1_022		2023-04-14 01:01:19	36.504	110	64758.5	547.781	8429.82	172.115	1.54787e+06	14653.4	0.0462663	0.000402918	0.129675	0.00215726		22.3099	0.390588	0.130196	0.00107873	-0.266509
WC-1_023		2023-04-14 01:54:37	36.504	110	48317.7	270.175	5258.23	110.585	1.18152e+06	8733.64	0.045171	0.000281434	0.10862	0.00220831		22.8899	0.394643	0.108845	0.00110428	-0.0209132
WC-1_024		2023-04-14 01:56:08	36.503	110	57049.7	413.597	6969.59	131.482	1.38588e+06	8787.02	0.0454982	0.000295019	0.122472	0.00214466		22.7263	0.392355	0.122188	0.00107245	-0.0481416
WC-1_025		2023-04-14 02:47:33	36.503	110	57043.3	377.782	6766.77	169.789	1.39088e+06	8390.62	0.0452746	0.000278094	0.117766	0.00199627		22.876	0.394224	0.118646	0.00099815	-0.692111
WC-1_026		2023-04-14 02:49:04	36.503	110	58475.5	354.704	8113.15	160.013	1.39384e+06	7837.35	0.0463205	0.000395953	0.138715	0.00266924		22.3606	0.391031	0.138768	0.00133464	-0.446322
WC-1_027		2023-04-14 03:42:27	36.504	110	61762.9	393.831	8109.58	102.633	1.43062e+06	12580.7	0.0477751	0.000301733	0.131227	0.00154937		21.7167	0.374585	0.131325	0.000774647	0.190601
WC-1_028		2023-04-14 03:43:57	36.504	110	62032.9	890.943	8617.08	304.59	1.33205e+06	9935.66	0.0513204	0.000791253	0.138406	0.00354119		20.2174	0.376595	0.138936	0.0017705	-0.484699
WC-1_029		2023-04-14 04:29:26	36.505	110	57665.5	399.793	6880.34	107.994	1.41386e+06	15024	0.0450486	0.000267266	0.119326	0.00168835		23.0654	0.397065	0.119335	0.000844113	-0.0324841
WC-1_030		2023-04-14 04:30:57	36.503	110	58238.6	312.997	7063.8	113.623	1.425e+06	10141.9	0.0452867	0.000309108	0.121584	0.00190022		22.9453	0.396889	0.121312	0.000950047	-0.180773
C_RA138
RA138_001		2023-04-14 14:17:39	36.506	110	83466.3	482.669	14645.5	265.307	1.36437e+06	8629.68	0.0634123	0.000368954	0.175318	0.00286741		16.28	0.413676	0.175594	0.00143369	0.545393
RA138_002		2023-04-14 14:19:09	36.506	110	86986.9	497.203	11809.2	107.853	1.52385e+06	13660.1	0.05922	0.000295074	0.136087	0.00136603		17.4313	0.442155	0.135856	0.000683007	0.176807
RA138_003		2023-04-14 15:08:44	36.504	110	91143.9	584.602	15117.4	245.992	1.53049e+06	11950.7	0.0617374	0.000354591	0.165726	0.00216655		16.6818	0.423816	0.165983	0.00108326	0.604973
RA138_004		2023-04-14 15:10:15	36.51	110	94051.3	463.116	12348.3	120.04	1.66711e+06	11955.1	0.0584748	0.000253637	0.13133	0.0011387		17.6114	0.446201	0.131388	0.000569341	0.296561
RA138_005		2023-04-14 16:00:12	36.504	110	82539.4	407.84	10787.4	108.849	1.46026e+06	9408.06	0.0586147	0.000285688	0.130698	0.00125612		17.5283	0.444524	0.130788	0.000628015	0.341654
RA138_006		2023-04-14 16:01:43	36.506	110	81858.8	548.411	12236.8	208.621	1.41938e+06	10344.9	0.0598937	0.000307227	0.150002	0.00229819		17.1528	0.435217	0.149595	0.00114901	0.49174
RA138_007		2023-04-14 16:49:44	36.505	110	84979.8	405.318	11604.3	186.993	1.51081e+06	9298.87	0.0582665	0.000280412	0.136416	0.00193058		17.5922	0.446092	0.136652	0.000965341	0.470586
RA138_008		2023-04-14 16:51:15	36.504	110	91073.2	593.519	15842.3	293.549	1.54751e+06	11772.8	0.0610202	0.000304386	0.173586	0.00261234		16.797	0.426072	0.174078	0.00130624	0.485377
RA138_009		2023-04-14 17:41:16	36.508	110	89148.7	583.009	12118.7	143.821	1.57076e+06	12871.2	0.058707	0.000292444	0.136517	0.00154649		17.4179	0.441815	0.136037	0.000773535	0.250773
RA138_010		2023-04-14 17:42:48	36.513	110	93642.6	598.713	14353.3	232.117	1.61757e+06	11618.8	0.0600532	0.000365967	0.153019	0.00206575		17.0262	0.432913	0.153389	0.00103326	0.505662
RA138_011		2023-04-14 18:30:54	36.503	110	96123.5	1184.63	22874	814.37	1.44853e+06	11384.2	0.0686269	0.000714258	0.236077	0.00567538		14.8654	0.383138	0.238137	0.00283722	0.898862
RA138_012		2023-04-14 18:32:25	36.504	110	88678.4	496.159	14867.2	206.412	1.48995e+06	10520.9	0.0616818	0.000357555	0.167524	0.00214002		16.538	0.420211	0.167774	0.0010698	0.344431
RA138_013		2023-04-14 19:22:09	36.503	110	94289.5	1312.62	17442.2	905.99	1.53519e+06	12322.7	0.0637248	0.000877556	0.183603	0.00691978		15.9702	0.417864	0.18512	0.00345866	0.837811
RA138_014		2023-04-14 19:23:40	36.504	110	92667.8	744.402	13470.2	215.8	1.62047e+06	16764.1	0.0593601	0.000396844	0.145342	0.0018909		17.1433	0.436525	0.145465	0.000945117	0.36542
RA138_015		2023-04-14 20:13:39	36.505	110	85831.3	612.824	13615.8	230.66	1.45046e+06	11578.3	0.0612763	0.000454621	0.158223	0.00226658		16.5679	0.422715	0.158749	0.00113342	0.324596
RA138_016		2023-04-14 20:15:10	36.504	110	94310.1	636.337	13559.8	195.198	1.6529e+06	12604.7	0.0590504	0.00038358	0.143823	0.00191573		17.1912	0.437535	0.143884	0.000957988	0.320351
RA138_017		2023-04-14 21:03:08	36.507	110	82327.7	448.242	13992.8	240.494	1.40767e+06	9287.82	0.0607113	0.000359237	0.169301	0.00275332		16.6829	0.424008	0.170088	0.00137697	-0.053385
RA138_018		2023-04-14 21:04:39	36.52	110	85242	496.538	11594.2	158.12	1.54034e+06	12054.2	0.057416	0.000351272	0.136002	0.00184608		17.6391	0.448521	0.136114	0.000923235	0.144534
RA138_019		2023-04-14 21:54:40	36.516	110	81248.3	505.376	10992.6	143.635	1.48982e+06	11417.7	0.0564458	0.000303447	0.135043	0.00163471		17.8996	0.454395	0.135395	0.000817324	0.255425
RA138_020		2023-04-14 21:56:11	36.514	110	75258.4	541.447	10335.3	207.358	1.39138e+06	11268.7	0.055993	0.000353252	0.137047	0.00225726		18.0431	0.459003	0.13743	0.00112859	0.390916
RA138_021		2023-04-14 22:44:22	36.504	110	79568.6	490.932	12988.4	226.693	1.38838e+06	10977.4	0.0592587	0.000431798	0.163034	0.00253024		17.0096	0.433822	0.163353	0.00126499	0.524959
RA138_022		2023-04-14 22:45:53	36.504	110	87722.5	542.162	12635.1	167.766	1.56289e+06	13957.3	0.0582858	0.000369739	0.144065	0.00192392		17.2923	0.439941	0.144139	0.00096186	0.413206
RA138_023		2023-04-14 23:35:51	36.503	110	90065.8	1321.03	16334.4	963.468	1.56487e+06	14328.5	0.0597987	0.000907606	0.177753	0.00665186		16.8146	0.443216	0.181493	0.00332533	0.9727
RA138_024		2023-04-14 23:37:22	36.507	110	78030.4	742.453	10674.3	175.629	1.45596e+06	17284	0.0556237	0.000405925	0.136874	0.00185906		18.0754	0.461018	0.136896	0.000929368	0.376908
RA138_025		2023-04-15 00:27:40	36.504	110	83297.6	487.504	11608	158.299	1.55019e+06	9195.43	0.0555738	0.000345531	0.139296	0.00194791		18.048	0.459028	0.139457	0.0009742	0.238758
RA138_026		2023-04-15 00:29:10	36.506	110	90369.2	591.726	16624	362.743	1.58522e+06	10278	0.0590148	0.00045577	0.183963	0.00340435		16.9944	0.433981	0.18409	0.00170261	0.606779
RA138_027		2023-04-15 01:17:18	36.508	110	88380.4	667.322	11917.2	146.383	1.64457e+06	17754.5	0.0556686	0.000382843	0.135474	0.00170208		17.9744	0.457917	0.134938	0.000851221	0.368883
RA138_028		2023-04-15 01:18:49	36.506	110	77089.8	600.75	10405.3	189.945	1.44121e+06	13131.5	0.0555366	0.000490883	0.135092	0.00248084		18.0158	0.461689	0.135074	0.00124068	0.224095
RA138_029		2023-04-15 01:40:46	36.522	110	80220.5	562.093	12436.9	201.273	1.44803e+06	14326.3	0.0573071	0.000416396	0.154738	0.00226866		17.4408	0.444793	0.155146	0.00113449	0.445961
RA138_030		2023-04-15 01:42:17	36.506	110	84542.1	539.552	10762.8	142.488	1.60534e+06	14299	0.0545381	0.000307113	0.127337	0.00154275		18.3249	0.465444	0.1274	0.000771479	0.151312
C_WC1
WC-1_001		2023-04-14 14:20:45	36.503	110	61324.6	479.481	5843.75	114.125	1.38151e+06	10818.9	0.0459563	0.000278158	0.0954916	0.00168343		22.4605	0.57103	0.0953612	0.000841706	-0.313947
WC-1_002		2023-04-14 14:22:16	36.503	110	62544.4	367.619	5946.82	102.681	1.45791e+06	8416	0.0444113	0.000228841	0.0950931	0.00157116		23.2402	0.589701	0.0951504	0.000785576	-0.0302138
WC-1_003		2023-04-14 15:11:51	36.504	110	54022.4	392.845	5009.97	92.8377	1.25474e+06	13002	0.0446791	0.000252528	0.0927784	0.0015011		23.0475	0.585423	0.0928061	0.000750539	0.122137
WC-1_004		2023-04-14 15:13:22	36.503	110	55386.2	445.881	6185.61	130.394	1.21916e+06	10969.3	0.047218	0.00034962	0.111331	0.00182483		21.8067	0.556355	0.111762	0.000912403	-0.205237
WC-1_005		2023-04-14 16:03:18	36.504	110	63814.6	485.655	6969.88	107.376	1.43612e+06	13900.9	0.0461018	0.000290191	0.10924	0.00147155		22.2826	0.566834	0.1093	0.00073572	0.0443879
WC-1_006		2023-04-14 16:04:49	36.504	110	67446.9	358.962	6755.94	86.7993	1.50246e+06	9131.48	0.0465563	0.000240671	0.10028	0.0013696		22.0635	0.55986	0.10024	0.000684749	-0.00697976
WC-1_007		2023-04-14 16:52:50	36.503	110	63654.4	474.806	5580.06	91.7923	1.50439e+06	10856.6	0.0438411	0.000276342	0.0877073	0.00133166		23.3772	0.594693	0.0877253	0.000665879	0.00693077
WC-1_008		2023-04-14 16:54:22	36.504	110	41187.7	362.537	4808.12	89.3073	922169	9340.42	0.0462945	0.000320645	0.116652	0.00204867		22.1368	0.564032	0.116821	0.00102442	0.145419
WC-1_009		2023-04-14 17:44:23	36.504	110	46777	319.67	5334.65	129.769	1.09914e+06	7471.24	0.0442659	0.000334615	0.113655	0.00236724		23.0968	0.589533	0.114127	0.00118406	-0.0195306
WC-1_010		2023-04-14 17:45:54	36.508	110	55070.4	670.84	5209.49	100.746	1.28562e+06	19278.7	0.0445284	0.00025947	0.0945054	0.00135572		22.959	0.583402	0.0946655	0.000678109	0.215224
WC-1_011		2023-04-14 18:34:00	36.504	110	74625	1583.33	10192	797.121	1.59261e+06	15986.3	0.0485417	0.000833851	0.124796	0.00311079		21.0132	0.5603	0.136675	0.00155507	-0.0373504
WC-1_012		2023-04-14 18:35:31	36.519	110	109567	942.039	25568	500.723	1.60091e+06	14601	0.0707255	0.000925123	0.233676	0.00303752		14.4211	0.376053	0.233525	0.00151838	-0.681805
WC-1_013		2023-04-14 19:25:15	36.504	110	59765.1	346.946	8901.43	124.978	1.28886e+06	10813.1	0.0481099	0.000315708	0.148782	0.0019176		21.1505	0.538394	0.149048	0.00095847	0.128829
WC-1_014		2023-04-14 19:26:46	36.518	110	66823.8	350.606	9212.65	124.011	1.46066e+06	12683.8	0.0474302	0.000359973	0.137933	0.00172715		21.4521	0.547599	0.137965	0.000863291	-0.3189
WC-1_015		2023-04-14 20:16:45	36.508	110	58605.5	389.296	8875.46	140.307	1.23309e+06	10069.6	0.0492152	0.000341058	0.15172	0.00205023		20.6251	0.525522	0.151554	0.00102527	-0.288115
WC-1_016		2023-04-14 20:18:16	36.504	110	73483.4	470.832	7896.05	112.033	1.70403e+06	15445.1	0.0447891	0.00022614	0.107341	0.00127696		22.6617	0.574903	0.107531	0.000638584	0.0386483
WC-1_017		2023-04-14 21:06:14	36.503	110	36354.9	415.908	7841.72	249.011	726778	4713.33	0.0515162	0.000545353	0.215043	0.00466397		19.6577	0.50701	0.215855	0.00233247	-0.75802
WC-1_018		2023-04-14 21:07:45	36.506	110	63648.4	472.141	6530.73	101.613	1.49025e+06	10326.9	0.0441929	0.000269205	0.102707	0.00153613		22.9135	0.582601	0.102681	0.00076822	0.0252646
WC-1_019		2023-04-14 21:57:47	36.504	110	61668.8	369.263	8416.74	125.538	1.37793e+06	10310.9	0.0464542	0.00031644	0.136556	0.0017756		21.7464	0.553917	0.136582	0.000887757	-0.217467
WC-1_020		2023-04-14 21:59:18	36.505	110	46797.5	232.059	9104.31	110.433	961830	6504.74	0.0504078	0.000347789	0.193968	0.00231801		20.0393	0.510554	0.194688	0.00115895	0.0105724
WC-1_021		2023-04-14 22:47:29	36.507	110	54685	469.338	4036.66	127.327	1.33196e+06	12732.6	0.0425215	0.000225953	0.0738558	0.0019691		23.7014	0.601599	0.0738702	0.000984444	-0.170514
WC-1_022		2023-04-14 22:49:00	36.506	110	58997.9	279.759	6285.51	95.5079	1.43134e+06	7598.91	0.0427067	0.000197308	0.106482	0.00162476		23.5969	0.598144	0.106615	0.00081229	0.00236342
WC-1_023		2023-04-14 23:38:57	36.506	110	56439	334.56	6350.17	101.143	1.39492e+06	7083.3	0.0418981	0.000232787	0.112343	0.00169376		23.9949	0.60936	0.112596	0.000846741	-0.024016
WC-1_024		2023-04-14 23:40:28	36.515	110	51770.4	345.145	5872.32	110.66	1.30012e+06	7436.39	0.0412249	0.00029428	0.114247	0.00206929		24.385	0.621672	0.113512	0.00103449	-0.169634
WC-1_025		2023-04-15 00:30:46	36.504	110	59137.4	441.257	7408.47	210.478	1.47469e+06	12618.1	0.0416078	0.000232602	0.124793	0.00305192		24.1024	0.612134	0.125366	0.00152636	-0.0666097
WC-1_026		2023-04-15 00:32:17	36.504	110	65731.5	474.395	7758.95	147.685	1.61438e+06	11352.4	0.0421902	0.000341415	0.118852	0.00223996		23.7679	0.607632	0.118126	0.00112028	-0.389677
WC-1_027		2023-04-15 01:20:24	36.504	110	66829.7	447.582	8623.91	201.475	1.65202e+06	13358.1	0.0419653	0.000239914	0.128063	0.0024101		23.8402	0.605643	0.129137	0.0012053	-0.202552
WC-1_028		2023-04-15 01:21:55	36.504	110	72175.3	567.556	9383.02	290.376	1.89034e+06	15512.8	0.0395869	0.00030573	0.128844	0.00324456		25.2706	0.645327	0.130098	0.0016226	-0.463591
WC-1_029		2023-04-15 01:43:52	36.506	110	57281.9	301.109	6129.4	87.1299	1.43551e+06	10146.4	0.0413578	0.000244619	0.107232	0.00144835		24.163	0.614118	0.107082	0.00072427	0.111708
WC-1_030		2023-04-15 01:45:23	36.504	110	54531.5	334.754	5807.37	78.0394	1.39116e+06	13265	0.0407636	0.000240246	0.106132	0.00152865		24.5134	0.622995	0.106573	0.000764415	0.310679
C_RA138
RA138_001		2023-05-11 13:25:36	36.506	110	78852	486.74	12695.3	238.396	1.4886e+06	10402.8	0.0547146	0.000281457	0.160805	0.00258593		17.2566	0.323384	0.161029	0.00129301	0.252561
RA138_002		2023-05-11 13:27:07	36.506	110	84688.9	386.946	12684.7	146.726	1.62622e+06	9837.61	0.0538783	0.0002531	0.149606	0.00162632		17.5281	0.327956	0.149805	0.000813194	0.373339
RA138_003		2023-05-11 14:18:14	36.504	110	85430.9	513.222	13959	201.676	1.58264e+06	11834.8	0.0558016	0.000290454	0.163593	0.0020558		17.0283	0.319176	0.163422	0.00102784	0.437864
RA138_004		2023-05-11 14:19:45	36.506	110	85644.2	443.085	14761.1	171.112	1.56691e+06	11406.9	0.0564753	0.000291086	0.171949	0.00170669		16.8278	0.315359	0.172382	0.000853289	0.405912
RA138_005		2023-05-11 15:11:08	36.504	110	80257	368.932	10781.8	150.116	1.56065e+06	8976.68	0.0532341	0.00028986	0.134223	0.00175064		17.9317	0.336415	0.134363	0.000875312	0.430627
RA138_006		2023-05-11 15:12:38	36.504	110	86310.2	423.949	12249.6	116.597	1.65406e+06	11029.6	0.0538393	0.000277134	0.141902	0.00146889		17.7319	0.332295	0.141949	0.000734443	0.365706
RA138_007		2023-05-11 16:02:04	36.504	110	89728.9	582.169	13607.1	169.634	1.68306e+06	14442	0.0550757	0.000330584	0.151768	0.00182382		17.3768	0.326742	0.151671	0.000912061	0.285181
RA138_008		2023-05-11 16:03:35	36.503	110	91488.9	605.144	17300.7	276.405	1.64321e+06	12825.4	0.0576179	0.000365156	0.188627	0.00260738		16.6109	0.312797	0.189134	0.0013039	0.510691
RA138_009		2023-05-11 16:54:46	36.503	110	78741.3	496.704	11263.6	141.516	1.49555e+06	11241.6	0.0545334	0.000299495	0.142979	0.00170056		17.5657	0.329608	0.143069	0.000850256	0.238925
RA138_010		2023-05-11 16:56:17	36.505	110	80283.8	443.66	11485.9	140.917	1.51687e+06	9588.92	0.054588	0.000343008	0.143302	0.00194067		17.5482	0.330368	0.14309	0.000962535	0.136107
RA138_011		2023-05-11 17:47:31	36.512	110	83758.4	582.293	12770.9	151.572	1.55975e+06	14902	0.0556076	0.000398582	0.153135	0.00190346		17.2183	0.325514	0.152498	0.000951477	0.321018
RA138_012		2023-05-11 17:49:02	36.505	110	88795.8	529.35	15629.1	193.759	1.601e+06	13745.3	0.0574704	0.000357197	0.176076	0.00225131		16.6597	0.313547	0.176041	0.00112535	0.331666
RA138_013		2023-05-11 18:38:33	36.504	110	77142.7	483.313	12674.7	238.521	1.44042e+06	11006.5	0.0553474	0.000299159	0.164058	0.002606		17.2774	0.32409	0.164329	0.00130303	0.394854
RA138_014		2023-05-11 18:40:04	36.506	110	86011.7	554.721	14377.9	245.718	1.59073e+06	12715.3	0.0562189	0.000358179	0.166677	0.00245693		17.0088	0.320338	0.16719	0.00122851	0.414129
RA138_015		2023-05-11 19:31:22	36.504	110	84691.1	550.292	13883.4	213.924	1.54753e+06	12986.2	0.0566834	0.00039802	0.164233	0.00247896		16.8437	0.318201	0.163957	0.00123997	0.434625
RA138_016		2023-05-11 19:32:53	36.504	110	90482.7	564.455	16828.9	259.382	1.59659e+06	12686.2	0.0585903	0.000440213	0.186074	0.00274323		16.2947	0.308601	0.186021	0.00137216	0.4999
RA138_017		2023-05-11 20:24:24	36.504	110	75678.8	460.039	10326.6	148.911	1.46824e+06	11476.5	0.0532453	0.000275758	0.136282	0.00172442		17.9081	0.335634	0.136476	0.000862263	0.32437
RA138_018		2023-05-11 20:25:55	36.503	110	79063.7	624.843	12239.9	163.905	1.49184e+06	13603.3	0.0548218	0.000323617	0.154628	0.00170122		17.3926	0.326903	0.154836	0.000850647	0.45838
RA138_019		2023-05-11 21:15:33	36.504	110	81495.6	1348.32	16570.1	1127.18	1.42517e+06	12659.8	0.0590795	0.00102091	0.201179	0.00974617		16.1302	0.330262	0.203359	0.00487123	0.965958
RA138_020		2023-05-11 21:17:04	36.51	110	75288.5	665.097	13041.2	309.558	1.36527e+06	11910.8	0.0569453	0.000474917	0.172339	0.00335298		16.7347	0.318377	0.173245	0.00167585	0.57041
RA138_021		2023-05-11 22:08:36	36.504	110	84797.9	422.706	14329.7	143.141	1.55514e+06	11938.4	0.0564534	0.000302027	0.16895	0.00164343		16.8853	0.316669	0.169014	0.000821459	0.402254
RA138_022		2023-05-11 22:10:07	36.504	110	95827	1346.47	20810.4	659.375	1.61651e+06	20807.3	0.0608034	0.000589566	0.21648	0.00424546		15.6776	0.300776	0.217203	0.00212208	0.734401
RA138_023		2023-05-11 23:01:54	36.504	110	85407.9	537.245	13848.2	201.551	1.57604e+06	14094.8	0.0559653	0.000375652	0.162586	0.00217623		17.0504	0.321626	0.162169	0.00108826	0.549479
RA138_024		2023-05-11 23:03:25	36.503	110	81405.3	553.375	13913.2	240.447	1.48974e+06	14523.8	0.0566322	0.000425405	0.170185	0.00246755		16.8502	0.319117	0.170941	0.00123394	0.617865
RA138_025		2023-05-11 23:53:16	36.506	110	79169.6	453.967	14573.2	173.578	1.42299e+06	9192.67	0.0574657	0.000313355	0.184583	0.00210472		16.6249	0.311909	0.184107	0.00105288	0.332796
RA138_026		2023-05-11 23:54:47	36.504	110	81897	613.342	14437.7	233.747	1.48704e+06	14796.8	0.0570586	0.000304731	0.176314	0.00244197		16.744	0.314008	0.17632	0.00122159	0.459872
RA138_027		2023-05-12 00:47:47	36.504	110	73054.9	669.668	12198.1	173.769	1.34113e+06	17476.6	0.0565329	0.00037781	0.16759	0.00228594		16.9048	0.318836	0.166999	0.00114314	0.449459
RA138_028		2023-05-12 00:49:18	36.506	110	84615	652.382	15962.7	246.695	1.49303e+06	15227.4	0.0585836	0.000365274	0.188879	0.00240169		16.3127	0.307043	0.188682	0.00120099	0.429799
RA138_029		2023-05-12 00:58:57	36.516	110	79213.1	507.171	13874.8	277.375	1.43193e+06	11253.1	0.0572197	0.000449836	0.175136	0.00330513		16.6985	0.316836	0.175187	0.0016525	0.584198
RA138_030		2023-05-12 01:00:28	36.503	110	76351.8	718.539	13081.2	298.801	1.40418e+06	11695.4	0.0560996	0.000374788	0.171338	0.00276677		17.0312	0.321217	0.171356	0.00138334	0.629729
C_WC1
WC-1_001		2023-05-11 13:22:30	36.506	110	45077.5	404.241	5143.57	99.8657	1.13503e+06	13740.9	0.0410986	0.000255832	0.113972	0.00202151		22.9642	0.432219	0.114124	0.00101078	0.178067
WC-1_002		2023-05-11 13:24:01	36.503	110	50029.4	309.74	5494.97	69.327	1.25939e+06	11313.6	0.041064	0.000218838	0.110045	0.00141056		22.9882	0.431089	0.109853	0.000705301	0.0842628
WC-1_003		2023-05-11 14:15:08	36.506	110	54740	620.966	5516.17	129.1	1.3608e+06	16045.2	0.0415738	0.000232084	0.100206	0.00196818		22.8483	0.428887	0.100787	0.000984043	-0.237658
WC-1_004		2023-05-11 14:16:38	36.504	110	42066.5	278.426	4029.22	66.1265	1.05913e+06	6127.18	0.0410463	0.000238794	0.0958902	0.00155235		23.1457	0.434882	0.0957979	0.000776135	0.128043
WC-1_005		2023-05-11 15:08:01	36.512	110	33439.8	268.535	3360	118.878	840742	4929.14	0.0409981	0.000345517	0.10122	0.00325115		23.2784	0.443096	0.100496	0.0016255	-0.462264
WC-1_006		2023-05-11 15:09:32	36.512	110	59294.7	379.891	5010.1	70.9519	1.51258e+06	10048.5	0.0404833	0.000200255	0.0843021	0.00113296		23.577	0.441511	0.084509	0.000566464	0.161402
WC-1_007		2023-05-11 15:58:57	36.507	110	52223.7	354.992	5309.71	110.179	1.30435e+06	9315.78	0.0413732	0.000237018	0.101741	0.00186561		23.1293	0.434416	0.101689	0.000932961	-0.0067187
WC-1_008		2023-05-11 16:00:29	36.505	110	51797.3	359.015	5694.07	82.3949	1.2663e+06	9230.73	0.0422152	0.000250351	0.110251	0.00168893		22.6692	0.426129	0.109948	0.000844608	-0.0106729
WC-1_009		2023-05-11 16:51:37	36.507	110	57374.8	342.495	6301.89	95.0992	1.44268e+06	11217.3	0.0411081	0.000228188	0.109934	0.0015897		23.3021	0.437349	0.109856	0.000794843	0.178483
WC-1_010		2023-05-11 16:53:09	36.505	110	54654.8	439.005	5737.47	161.184	1.34717e+06	8560.21	0.0418213	0.000282982	0.104793	0.00242979		22.9049	0.432172	0.104994	0.00121487	-0.433839
WC-1_011		2023-05-11 17:44:24	36.504	110	52927.5	481.813	4336.54	79.1558	1.36531e+06	13896.8	0.0400868	0.00022214	0.0814979	0.0012764		23.8863	0.448297	0.0819472	0.000638032	0.0996267
WC-1_012		2023-05-11 17:45:55	36.504	110	56200.1	432.669	4971.55	93.4529	1.41887e+06	11426.1	0.0409891	0.000213757	0.0884802	0.00132875		23.3598	0.437869	0.0884763	0.000664197	0.0444855
WC-1_013		2023-05-11 18:35:26	36.505	110	53285.2	432.854	4844.3	81.7418	1.34411e+06	8325.74	0.0409136	0.000254109	0.0909697	0.00145002		23.3747	0.43992	0.0909278	0.000725005	0.153217
WC-1_014		2023-05-11 18:36:57	36.504	110	50652.3	344.496	5416.49	77.2075	1.31826e+06	11171.5	0.0397451	0.000229407	0.107037	0.00149606		24.0609	0.451992	0.106953	0.000748035	0.347173
WC-1_015		2023-05-11 19:28:15	36.506	110	50967.5	376.291	5033.83	68.7367	1.23875e+06	16484.5	0.0426372	0.000271875	0.0994073	0.00147623		22.3946	0.421783	0.098782	0.000738405	0.0865642
WC-1_016		2023-05-11 19:29:46	36.504	110	57572.5	395.594	5764.56	101.331	1.43243e+06	13915.1	0.0415326	0.000210555	0.0998724	0.00146211		22.9892	0.430693	0.100144	0.000731344	0.266491
WC-1_017		2023-05-11 20:21:17	36.504	110	50243.1	471.102	5755.52	178.416	1.23826e+06	13441.4	0.041963	0.000224226	0.11382	0.00269143		22.7242	0.426161	0.114572	0.00134585	-0.115578
WC-1_018		2023-05-11 20:22:48	36.503	110	48569.2	472.24	5058.67	139.32	1.19865e+06	14134.1	0.041905	0.000247307	0.103279	0.0021503		22.755	0.42769	0.104171	0.00107524	0.0546429
WC-1_019		2023-05-11 21:12:26	36.504	110	54561.2	573.441	5318.73	108.986	1.37265e+06	17361	0.0411523	0.000242767	0.0976636	0.00154445		23.1574	0.435248	0.0974981	0.000771945	0.0221584
WC-1_020		2023-05-11 21:13:57	36.504	110	68098.7	1238.58	10686.4	613.445	1.57964e+06	17612.6	0.0444816	0.000483357	0.15237	0.00608095		21.424	0.414364	0.156951	0.00303935	-0.786616
WC-1_021		2023-05-11 22:05:29	36.504	110	64418	892.378	6815.78	325.267	1.65237e+06	15246.3	0.0404563	0.000490934	0.10348	0.0028233		23.5611	0.460121	0.105823	0.00141119	-0.813392
WC-1_022		2023-05-11 22:07:00	36.506	110	55346.4	395.904	5610.84	83.2078	1.50411e+06	14860.9	0.038029	0.000190387	0.10152	0.00140671		25.0654	0.469484	0.101394	0.000703131	0.164343	x
WC-1_023		2023-05-11 22:58:48	36.504	110	61045.9	425.488	8844	228.841	1.4464e+06	9407.71	0.0434942	0.00030036	0.144396	0.00313735		21.9376	0.414198	0.144899	0.00156882	-0.359211
WC-1_024		2023-05-11 23:00:19	36.504	110	63505.5	380.771	6374.2	95.3534	1.66278e+06	9368.24	0.0394174	0.000203193	0.100288	0.00146729		24.2074	0.453657	0.100389	0.000733724	0.105062
WC-1_025		2023-05-11 23:50:10	36.504	110	60979.5	297.447	7055.83	126.142	1.55902e+06	8055.66	0.0404764	0.000226238	0.115499	0.00198146		23.6015	0.443037	0.115728	0.000991196	-0.135794
WC-1_026		2023-05-11 23:51:41	36.51	110	63128.9	393.618	7259.29	147.346	1.62652e+06	12811.8	0.0401477	0.000222451	0.114792	0.00196231		23.7955	0.446592	0.115011	0.000981625	-0.0357276
WC-1_027		2023-05-12 00:44:40	36.508	110	63294.9	431.838	7059.1	239.522	1.62975e+06	9140.35	0.0401868	0.000332461	0.111411	0.00318814		23.7817	0.452272	0.111546	0.00159437	-0.600879
WC-1_028		2023-05-12 00:46:12	36.506	110	60167.6	372.27	5941.15	93.7019	1.54971e+06	11138.4	0.0400308	0.00025829	0.0989214	0.00147976		23.874	0.4498	0.0987597	0.000740005	-0.0196105
WC-1_029		2023-05-12 00:55:51	36.512	110	37762.5	343.13	4316.73	141.215	924708	8718.95	0.0422048	0.000314108	0.112875	0.00293076		22.6407	0.428627	0.114332	0.00146544	-0.198391
WC-1_030		2023-05-12 00:57:22	36.505	110	45755	353.043	5063.77	86.3305	1.11839e+06	11397.6	0.0422829	0.000261035	0.110721	0.00173124		22.5982	0.425236	0.11069	0.000865624	0.00554938
C_RA138
RA138_001		2023-05-22 14:58:46	37.507	110	120633	1642.94	28278.3	640.235	1.81591e+06	19361.1	0.0663727	0.000466021	0.236446	0.00368128		14.2034	0.285221	0.234359	0.00184021	0.0699431
RA138_002		2023-05-22 15:03:20	37.507	110	123569	796.463	28226.5	507.471	2.06563e+06	13890.3	0.0607409	0.000395094	0.226992	0.0030516		15.5135	0.310853	0.228371	0.00152558	0.49822
RA138_003		2023-05-22 15:28:37	37.504	110	116677	801.828	27353.2	685.452	1.87849e+06	16476.5	0.0627257	0.000510166	0.232608	0.00416006		15.0032	0.30285	0.23438	0.00208032	0.258486
RA138_004		2023-05-22 15:52:15	37.503	110	111792	652.196	24052.6	348.139	1.86175e+06	13749.7	0.0611702	0.000399965	0.216463	0.00265182		15.3899	0.308419	0.215103	0.00132618	0.722917
RA138_005		2023-05-22 16:17:38	37.504	110	106049	488.731	14633	134.209	1.97595e+06	17066.2	0.0544264	0.000301978	0.137988	0.00127283		17.3259	0.345922	0.137951	0.000636548	0.67778
RA138_006		2023-05-22 16:41:22	37.503	110	119303	950.82	19990.6	450.945	2.12499e+06	19312.9	0.0569496	0.00027804	0.165066	0.00305381		16.5999	0.330703	0.167521	0.00152701	0.0529219
RA138_007		2023-05-22 17:06:59	37.504	110	119654	506.543	21011.9	201.914	2.0988e+06	14997.9	0.0579376	0.000290319	0.175246	0.00162483		16.3728	0.326309	0.175563	0.000812381	0.0356319
RA138_008		2023-05-22 17:31:04	37.504	110	126336	1143.05	23236	633.86	2.19027e+06	17052	0.0585291	0.000501485	0.181755	0.00418023		16.2664	0.329081	0.183878	0.00208992	0.148975
RA138_009		2023-05-22 17:56:21	37.504	110	103908	512.163	24326	229.768	1.64198e+06	8076.43	0.0639196	0.000335801	0.234798	0.00186702		14.9547	0.298281	0.234054	0.000933413	0.522491
RA138_010		2023-05-22 18:20:18	22.1099	110	116181	848.263	23550.9	439.578	1.96832e+06	18256.3	0.0596437	0.000474129	0.20324	0.00388483		16.088	0.324454	0.20266	0.00194224	0.485517
RA138_011		2023-05-22 18:45:39	37.505	110	120278	780.668	20985	470.162	2.11149e+06	20139.6	0.0578925	0.000400397	0.173785	0.00335077		16.6387	0.333973	0.174429	0.00167519	0.212644
RA138_012		2023-05-22 19:09:12	37.504	110	111048	617.013	23636	304.575	1.81909e+06	13695.7	0.0621593	0.000386305	0.213175	0.00252975		15.5478	0.311182	0.212794	0.00126472	0.768386
RA138_013		2023-05-22 19:34:30	37.506	110	117133	558.773	22262.4	260.171	1.98621e+06	11063.9	0.0595646	0.000368941	0.190416	0.00187978		16.2757	0.325724	0.190016	0.000939849	0.846488
RA138_014		2023-05-22 19:58:17	37.504	110	119299	864.935	29304.3	524.711	1.90503e+06	15474.4	0.0637165	0.000426318	0.244582	0.00315311		15.2524	0.305855	0.245579	0.00157673	0.804575
RA138_015		2023-05-22 20:23:44	37.505	110	109160	622.584	17272.2	187.439	1.95805e+06	12909	0.0566161	0.000258648	0.15909	0.00145756		17.2003	0.342345	0.158191	0.000729005	0.346575
RA138_016		2023-05-22 20:47:36	37.506	110	114645	754.818	27453.7	434.981	1.80165e+06	12731.7	0.0644848	0.000394652	0.240392	0.00279003		15.1218	0.302546	0.239409	0.00139549	0.798154
RA138_017		2023-05-22 21:12:46	37.508	110	113978	513.772	18009.5	149.317	2.03755e+06	14156.7	0.0566111	0.000275784	0.157939	0.00127378		17.2391	0.343426	0.157971	0.000636967	0.510828
RA138_018		2023-05-22 21:36:14	37.504	110	102815	675.449	22359.5	286.283	1.68236e+06	10644.1	0.0619018	0.000367998	0.217932	0.00215835		15.7692	0.31529	0.217422	0.00107887	0.707774
RA138_019		2023-05-22 22:01:35	37.504	110	109657	529.298	16389.8	163.879	1.99731e+06	13025.8	0.0555771	0.000227992	0.149337	0.00133142		17.5585	0.349027	0.149429	0.000665388	0.298485
RA138_020		2023-05-22 22:25:30	37.505	110	109736	553.365	21945.9	262.574	1.86018e+06	11505.7	0.0597142	0.000364581	0.199963	0.00195429		16.3301	0.326703	0.199939	0.00097686	0.474813
RA138_021		2023-05-22 22:50:59	37.504	110	102007	564.161	15033.7	176.523	1.85897e+06	13739.5	0.0556926	0.00028391	0.147945	0.00138486		17.4892	0.348657	0.147343	0.000692399	0.614342
RA138_022		2023-05-22 23:14:53	37.504	110	102574	851.672	19315.9	445.987	1.743e+06	16166.7	0.0592245	0.000439055	0.187696	0.00365366		16.4248	0.330406	0.188266	0.00182704	0.868225
RA138_023		2023-05-22 23:40:22	37.505	110	106663	736.625	21232.8	275.447	1.78818e+06	12936.4	0.0604622	0.000321713	0.200427	0.00194537		16.0647	0.320491	0.199016	0.000972843	0.439924
RA138_024		2023-05-23 00:04:09	20.8624	110	121190	684.088	29690.7	349.883	1.94238e+06	10309.4	0.0639261	0.000423108	0.24578	0.00259337		15.1745	0.304202	0.244934	0.00129697	0.521876
RA138_025		2023-05-23 00:29:30	37.504	110	109454	601.41	18406.5	235.6	1.9406e+06	12600.1	0.0573137	0.000246935	0.168568	0.00177471		16.9069	0.336261	0.168126	0.00088755	0.381297
RA138_026		2023-05-23 00:53:24	37.504	110	107840	552.83	16691.9	230.429	1.92819e+06	15362.5	0.0568375	0.000324626	0.154763	0.00200474		17.04	0.340409	0.154746	0.00100248	0.25582
RA138_027		2023-05-23 01:18:51	37.504	110	115088	672.466	18276.1	166.016	2.06194e+06	15937.8	0.0564804	0.000283953	0.158714	0.00128098		17.1525	0.341867	0.158763	0.000640534	0.343461
RA138_028		2023-05-23 01:42:41	37.504	110	117248	641.277	23228.1	253.637	1.97864e+06	17369.6	0.0599041	0.000380601	0.199088	0.00174596		16.1932	0.324276	0.198063	0.000872992	0.659851
RA138_029		2023-05-23 02:01:43	37.505	110	103642	812.673	14674.2	273.737	1.91635e+06	18993	0.0548559	0.000300158	0.140632	0.00210677		17.7178	0.353653	0.141551	0.00105323	0.445495
RA138_030		2023-05-23 02:07:45	37.504	110	104192	733.794	19400.5	533.566	1.85135e+06	16319.2	0.0571716	0.000491872	0.187288	0.00446707		17.014	0.344268	0.186156	0.00223304	0.849879
C_WC1
WC-1_001		2023-05-22 15:00:20	34.4681	110	63927.2	474.523	6331.82	546.081	1.65668e+06	12573.7	0.0394605	0.000267935	0.0974659	0.00767682		23.8864	0.479191	0.0990236	0.00383765	-0.0487934
WC-1_002		2023-05-22 15:01:48	17.2312	110	32531.8	1268.06	2849.24	161.504	871352	8988.76	0.0384982	0.00129246	0.0884148	0.00491063		24.48	0.634923	0.0875624	0.00245489	0.0292393
WC-1_003		2023-05-22 15:02:06	20.1671	110	26670.8	443.444	2085.83	54.9785	821837	9594.11	0.0325917	0.000293232	0.07837	0.00197625		28.9156	0.586327	0.0781876	0.000987959	0.0191189
WC-1_004		2023-05-22 15:27:04	37.504	110	91425.8	533.921	7427.75	118.821	2.29461e+06	10625.3	0.0401415	0.000185553	0.0821839	0.00146522		23.4448	0.466704	0.0812241	0.000691768	0.386414
WC-1_005		2023-05-22 15:50:42	37.503	110	86371.6	671.81	9879.48	261.457	2.1584e+06	18986.8	0.0404815	0.000258177	0.11392	0.00297053		23.2537	0.465711	0.114356	0.00148557	-0.0279763
WC-1_006		2023-05-22 16:16:09	35.0931	110	124787	1522.31	26469.9	718.796	2.96815e+06	22405.7	0.0425258	0.000403006	0.212208	0.00379325		22.1716	0.450787	0.212069	0.00189704	0.780566
WC-1_007		2023-05-22 16:39:49	37.504	110	78867.3	548.066	8692.78	136.57	1.88849e+06	10752.4	0.0423456	0.000257157	0.109589	0.00135186		22.3207	0.446496	0.110194	0.000675978	0.552631
WC-1_008		2023-05-22 17:05:26	37.512	110	55127.6	342.022	6099.15	308.776	1.37233e+06	9687.03	0.0407602	0.000276298	0.110282	0.00571097		23.2675	0.466753	0.11061	0.00282151	0.00468657
WC-1_009		2023-05-22 17:29:32	37.52	110	64945.8	1303.91	11932.4	362.551	1.41208e+06	9335.27	0.0467007	0.000967645	0.18303	0.00498619		20.3815	0.45495	0.183684	0.00249287	0.0153697
WC-1_010		2023-05-22 17:54:49	37.507	110	90222.7	660.321	10523.1	191.78	2.14955e+06	22245.1	0.0425499	0.000246004	0.116255	0.00181103		22.4598	0.448794	0.116607	0.000905423	0.155886
WC-1_011		2023-05-22 18:18:46	37.506	110	84325.5	488.651	10207.3	145.13	1.96219e+06	13853	0.0435482	0.00023628	0.121219	0.00157339		22.0288	0.439632	0.121017	0.000786625	0.305152
WC-1_012		2023-05-22 18:44:07	37.504	110	71806.2	504.597	7772.99	124.741	1.73157e+06	15806.7	0.0419355	0.000218458	0.108477	0.00148626		22.9649	0.457982	0.108224	0.000743043	0.519605
WC-1_013		2023-05-22 19:07:45	32.6042	110	60383	282.433	6197.64	112.835	1.37915e+06	5567.09	0.0442906	0.000235489	0.102514	0.00180946		21.8162	0.435229	0.102614	0.000904618	0.00751393
WC-1_014		2023-05-22 19:32:57	37.505	110	58276.1	442.988	6782.2	99.8114	1.39246e+06	6330.32	0.0422232	0.000254238	0.117012	0.00159992		22.9561	0.459118	0.116353	0.000799914	0.353755
WC-1_015		2023-05-22 19:56:45	37.512	110	68313.1	376.977	9731.6	169.396	1.58072e+06	9291.11	0.0438989	0.000263433	0.142423	0.0024738		22.1347	0.442655	0.142422	0.00123701	0.609333
WC-1_016		2023-05-22 20:22:12	37.504	110	65394.7	331.629	8274.58	111.586	1.53525e+06	6900.88	0.0433619	0.000239534	0.126525	0.00147735		22.4555	0.448299	0.126503	0.000738898	0.379808
WC-1_017		2023-05-22 20:46:04	37.514	110	81224	536.135	10334.5	263.439	1.91256e+06	16792	0.0430148	0.000215823	0.125637	0.00257639		22.668	0.451782	0.127204	0.00128865	0.249452
WC-1_018		2023-05-22 21:11:13	37.504	110	56564.6	414.541	7068.68	223.058	1.33302e+06	8507.76	0.0431213	0.000322169	0.123899	0.00289206		22.6313	0.455381	0.124937	0.00144624	0.87952
WC-1_019		2023-05-22 21:34:41	37.503	110	75633.5	651.527	7383.11	211.09	1.82035e+06	24194.8	0.0417583	0.000273458	0.0989856	0.00305223		23.376	0.468482	0.0975936	0.00145744	0.694184
WC-1_020		2023-05-22 22:00:04	37.505	110	85344.8	711.334	12442.4	300.944	2.08483e+06	15764.4	0.0417376	0.000312396	0.144214	0.00221328		23.3814	0.470502	0.145755	0.0011061	0.912241
WC-1_021		2023-05-22 22:23:58	37.521	110	64465.8	347.462	7539.74	110.723	1.53095e+06	9225.03	0.0426882	0.000251646	0.117267	0.00177119		22.8446	0.456673	0.116929	0.000885325	0.0159514
WC-1_022		2023-05-22 22:49:27	37.506	110	62805.9	403.092	11085.3	143.395	1.35786e+06	6501.27	0.0469249	0.000285228	0.176767	0.00209541		20.7586	0.415258	0.176459	0.00104764	0.316359
WC-1_023		2023-05-22 23:13:20	37.504	110	71536.5	568.351	6680.97	87.6649	1.7548e+06	20366.8	0.041504	0.000239802	0.0932391	0.00115111		23.4395	0.468365	0.0933702	0.000575616	0.182277
WC-1_024		2023-05-22 23:38:50	37.512	110	84950.9	384.589	9358.64	141.274	2.01831e+06	10613.8	0.0428005	0.00021049	0.110445	0.00149546		22.6958	0.452196	0.110139	0.000747853	0.295489
WC-1_025		2023-05-23 00:02:36	37.506	110	84202	472.171	8793.76	145.139	2.02396e+06	14358.7	0.0419871	0.000206579	0.104744	0.00162589		23.1052	0.460356	0.104411	0.000813119	0.31798
WC-1_026		2023-05-23 00:27:57	37.505	110	102799	554.006	13135.3	135.892	2.47508e+06	20808	0.0419225	0.000259364	0.12812	0.00126319		23.1153	0.462592	0.127746	0.000631737	0.685876
WC-1_027		2023-05-23 00:51:52	37.504	110	60540.9	398.253	5938.51	84.923	1.46192e+06	11234.9	0.0420512	0.000246111	0.0988569	0.00134576		23.032	0.460346	0.0980674	0.00067296	0.32267
WC-1_028		2023-05-23 01:17:19	37.506	110	69947.9	385.961	7357.32	91.368	1.62774e+06	14527.9	0.0435986	0.000264099	0.10485	0.00128297		22.2194	0.444445	0.105158	0.000641528	0.460819
WC-1_029		2023-05-23 01:41:08	37.504	110	109726	816.622	20446.2	254.468	2.70398e+06	12579.9	0.0411753	0.000309858	0.187841	0.00201051		23.5559	0.474104	0.186294	0.00100528	0.393423
WC-1_030		2023-05-23 02:00:11	37.503	110	77993	464.276	6108.34	102.011	1.91605e+06	9046.63	0.0413976	0.000239635	0.0782422	0.00132974		23.4734	0.46906	0.0783003	0.000664787	0.433328
WC-1_031		2023-05-23 02:09:16	37.512	110	61367.8	398.794	6370.57	83.0233	1.49775e+06	8563.12	0.0415301	0.000230003	0.104205	0.0016494		23.4272	0.46772	0.103785	0.000755872	-0.0388996
RA138
RA138_001		2023-06-14 13:20:56	36.512	110	161612	3213.19	50195.8	1358.06	2.05236e+06	41940	0.0804476	0.00123548	0.311499	0.00488993		13.0362	0.316443	0.310632	0.00244405	0.201644
RA138_002		2023-06-14 13:22:22	36.506	110	137925	1827.21	29457.7	606.36	2.1167e+06	30684.7	0.0672305	0.000520961	0.211095	0.00409074		15.5968	0.364205	0.213603	0.00204461	-0.0630296
RA138_003		2023-06-14 13:47:40	37.2307	110	126135	744.45	23541.9	460.142	1.931e+06	17462.2	0.0679348	0.000451517	0.186134	0.00343704		15.4136	0.358617	0.186663	0.00171876	-0.266911
RA138_004		2023-06-14 14:19:16	19.1603	110	156555	2921.21	45227.5	1957.72	2.08078e+06	25355	0.0789186	0.00126812	0.28545	0.00781835		13.2803	0.323895	0.288927	0.00391055	-0.669195
RA138_005		2023-06-14 14:20:43	36.0558	110	133251	853.848	28420.1	413.652	1.99012e+06	13722.2	0.069685	0.000384078	0.21202	0.0024662		15.0416	0.348845	0.213308	0.00123354	-0.240756
RA138_006		2023-06-14 15:13:02	36.506	110	129689	819.353	25301.4	452.966	2.01158e+06	16479.9	0.0672014	0.000467578	0.194191	0.00301329		15.6995	0.365625	0.195116	0.00150662	-0.132686
RA138_007		2023-06-14 15:14:29	36.5564	110	138146	2063.07	43091.1	1598.83	1.73379e+06	11297	0.0821577	0.00115983	0.306274	0.00592236		12.8446	0.309365	0.311962	0.00296116	-0.939353
RA138_008		2023-06-14 16:06:33	36.503	110	127955	1200.72	28577.7	660.915	1.95031e+06	17330.6	0.0684301	0.000483288	0.222149	0.00333824		15.5808	0.362984	0.223368	0.00166896	-0.678676
RA138_009		2023-06-14 16:08:00	36.504	110	137384	911.967	31603.1	664.115	2.05652e+06	11892.8	0.0693356	0.000584366	0.228312	0.00370039		15.3822	0.360098	0.230062	0.00184997	-0.443684
RA138_010		2023-06-14 16:59:59	36.52	110	123377	630.731	31868	384.576	1.80689e+06	18908.7	0.0711924	0.000483323	0.255968	0.00284622		15.1567	0.352796	0.25833	0.00142304	-0.422733
RA138_011		2023-06-14 17:01:25	36.508	110	150530	2684.42	46456.2	1592.38	1.99033e+06	24934.9	0.0795019	0.000860571	0.309459	0.00651831		13.5769	0.321164	0.308655	0.00325898	-0.662229
RA138_012		2023-06-14 17:51:27	36.506	110	126847	855.761	27521.3	447.301	1.83944e+06	14325	0.0714096	0.000392588	0.216091	0.00246688		15.2778	0.35431	0.216989	0.00123338	-0.121043
RA138_013		2023-06-14 17:52:53	36.504	110	149514	1189.25	41438.1	1002.81	2.00319e+06	14179	0.0778847	0.000681331	0.275957	0.00488648		14.0117	0.328425	0.277185	0.0024431	-0.744546
RA138_014		2023-06-14 18:44:29	36.504	110	126115	867.98	22715.7	478.505	1.94652e+06	13222.8	0.067277	0.000415067	0.178708	0.00283388		16.3661	0.38024	0.180141	0.00141722	-0.159862
RA138_015		2023-06-14 18:45:55	36.504	110	125886	932.144	26065.6	459.121	1.867e+06	15922.7	0.0702727	0.00047308	0.207476	0.00289762		15.6716	0.364716	0.207082	0.00144912	-0.44049
RA138_016		2023-06-14 19:37:35	36.504	110	111940	755.294	20464.6	356.373	1.7209e+06	13776.6	0.0677821	0.000384911	0.183389	0.00270598		16.3379	0.379073	0.18284	0.00135308	-0.41565
RA138_017		2023-06-14 19:39:02	36.508	110	127399	1128.47	29274.7	669.674	1.80519e+06	12671.1	0.0733992	0.00045838	0.229247	0.00367939		15.0891	0.350647	0.229816	0.0018398	-0.471401
RA138_018		2023-06-14 20:30:52	36.506	110	163350	1699.77	82184.5	1441.52	1.3164e+06	19035.2	0.129111	0.00228815	0.504059	0.00500109		8.58844	0.211909	0.503179	0.00249988	-0.769443
RA138_019		2023-06-14 20:32:19	17.4693	110	136643	2205.36	30303.7	1088.27	1.97963e+06	21306.5	0.0727612	0.000753201	0.219422	0.00551888		15.2392	0.359679	0.2218	0.00275871	-0.253408
RA138_020		2023-06-14 21:24:00	36.504	110	132168	938.822	35463.8	579.631	1.83426e+06	8447.92	0.0748147	0.000517929	0.269479	0.00346536		14.7637	0.343792	0.268356	0.00173274	-0.277787
RA138_021		2023-06-14 21:25:27	36.506	110	144383	936.854	38806	550.539	1.98158e+06	14855	0.0759169	0.000456905	0.269816	0.00305244		14.5466	0.337823	0.268804	0.00152636	-0.237846
RA138_022		2023-06-14 22:15:29	36.512	110	131681	1804.29	31716.2	903.507	1.79787e+06	19781.8	0.0758771	0.000646696	0.240709	0.00426645		14.4229	0.337765	0.240884	0.00213341	-0.642949
RA138_023		2023-06-14 22:16:56	36.504	110	137459	701.04	31611.3	396.984	1.92536e+06	15691.1	0.0743981	0.000559805	0.229645	0.00265966		14.7046	0.343103	0.229996	0.00132986	-0.131458
RA138_024		2023-06-14 23:08:30	36.512	110	135897	697.582	43675.1	519.664	1.65703e+06	10416.3	0.0851629	0.000566841	0.32047	0.00290287		12.6529	0.294394	0.321422	0.00145164	-0.176163
RA138_025		2023-06-14 23:09:56	36.505	110	129093	1916.78	28851.9	1556.29	1.87956e+06	13935.3	0.0710815	0.00103357	0.214984	0.00487976		15.1518	0.365888	0.223524	0.00244024	-0.927548
RA138_026		2023-06-15 00:01:39	36.504	110	130581	641.19	34173	366.561	1.8539e+06	13387.5	0.0732639	0.000399476	0.260239	0.00216158		14.3916	0.333719	0.26173	0.00108057	-0.244006
RA138_027		2023-06-15 00:03:05	36.504	110	118634	1664.71	31400.8	951.939	1.64386e+06	20134	0.0738888	0.000672402	0.261963	0.00478401		14.2602	0.334729	0.264718	0.00239152	-0.727094
RA138_028		2023-06-15 00:54:54	36.504	110	118418	1424.13	34033.3	925.069	1.62553e+06	15725.1	0.0750969	0.000753081	0.285056	0.00471721		13.6526	0.321753	0.287433	0.00235919	-0.751318
RA138_029		2023-06-15 00:56:21	36.504	110	134890	1233.94	30239.4	737.418	2.04281e+06	17250.4	0.0683988	0.000451085	0.22301	0.00383153		14.9769	0.348402	0.224204	0.00191626	-0.444317
RA138_030		2023-06-15 01:48:22	36.505	110	95862.6	1167.08	32501.9	730.79	1.27575e+06	10117.1	0.078074	0.000799905	0.34015	0.00425184		12.6918	0.299408	0.339087	0.00212555	-0.646963
RA138_031		2023-06-15 01:49:49	36.52	110	95846.5	719.799	16341.7	316.903	1.72876e+06	13133.7	0.0575628	0.000350914	0.170185	0.00260914		17.1971	0.399463	0.170519	0.00130434	-0.279808
RA138_032		2023-06-15 02:40:18	36.512	110	128634	1342.1	37654.8	867.49	1.92501e+06	19936.5	0.0698361	0.000742846	0.292369	0.00426814		13.6559	0.322742	0.292764	0.00213396	-0.655617
RA138_033		2023-06-15 02:41:52	29.1161	110	104644	928.652	24041.7	453.708	1.76807e+06	14651	0.0606607	0.000457429	0.229747	0.00323472		15.7022	0.3664	0.229774	0.00161728	-0.163607
RA138_034		2023-06-15 03:07:04	36.505	110	91455.5	577.284	20354.8	402.663	1.56624e+06	12848.6	0.0603352	0.000484716	0.223884	0.00375515		15.4709	0.361638	0.222591	0.00187767	-0.506579
RA138_035		2023-06-15 03:08:31	36.508	110	102100	1013.43	21639	463.783	1.76345e+06	17406.2	0.0598117	0.000435467	0.210511	0.0036643		15.5878	0.363408	0.211965	0.00183225	-0.303802
C_WC1
WC-1_001		2023-06-14 13:17:53	36.512	110	80487.3	450.108	9396.2	468.602	1.81557e+06	13886.2	0.0461229	0.000283475	0.116462	0.00605394		22.7452	0.528412	0.116755	0.00292927	0.103172
WC-1_002		2023-06-14 13:19:19	36.504	110	95515.8	883.586	12484.3	250.773	2.07556e+06	20305.3	0.0478857	0.000371732	0.131186	0.00210188		21.9044	0.511522	0.13072	0.00105055	0.00847089
WC-1_003		2023-06-14 14:16:13	36.504	110	89216.8	436.222	10014	127.761	2.08988e+06	12394.6	0.0444226	0.000234352	0.11248	0.00154665		23.5884	0.546737	0.112257	0.000766795	0.0771749
WC-1_004		2023-06-14 14:17:39	10.9769	110	87235.4	1296.1	9022.62	309.27	2.07236e+06	15552.3	0.0457821	0.00043848	0.102947	0.0041555		22.89	0.53838	0.103441	0.00193198	0.129771
WC-1_005		2023-06-14 15:09:59	36.504	110	76346.2	543.576	8133.1	139.315	1.68425e+06	12096.8	0.0472469	0.000347015	0.106334	0.00167101		22.3187	0.520443	0.106542	0.000835463	0.164443
WC-1_006		2023-06-14 15:11:26	36.504	110	85329.1	781.307	10875.2	219.422	1.88228e+06	20823.2	0.0472036	0.000245278	0.126873	0.00199062		22.3445	0.517807	0.127466	0.000995272	0.0214756
WC-1_007		2023-06-14 16:03:29	36.506	110	110720	753.235	14429	304.062	2.38965e+06	17294.4	0.0481632	0.000283888	0.130289	0.00233314		22.1225	0.513585	0.130335	0.00116649	-0.583488
WC-1_008		2023-06-14 16:04:56	36.506	110	82392.8	510.325	9656	134.637	1.89337e+06	17532.5	0.0453964	0.000234267	0.116584	0.0013316		23.4781	0.544031	0.117209	0.000665746	0.0374437
WC-1_009		2023-06-14 16:57:15	16.7609	110	82741.7	452.544	10101.1	193.838	1.8793e+06	12307.5	0.0447088	0.000326982	0.122504	0.00257813		24.1201	0.562389	0.122095	0.00121799	0.0657325
WC-1_010		2023-06-14 16:58:22	36.506	110	99534.4	842.464	12064.8	220.747	2.26891e+06	18978.9	0.045864	0.000242198	0.12201	0.00176896		23.5185	0.545126	0.121227	0.000884406	-0.377283
WC-1_011		2023-06-14 17:48:23	36.504	110	105514	730.992	16641.4	208.287	2.12746e+06	23759.4	0.0517361	0.000323358	0.157591	0.00139302		21.0746	0.489747	0.157736	0.000696484	-0.0929483
WC-1_012		2023-06-14 17:49:50	36.506	110	70831.8	598.136	7634.33	128.537	1.53221e+06	18421.7	0.0481166	0.000264788	0.10805	0.001632		22.6665	0.525669	0.107794	0.000815964	-0.029138
WC-1_013		2023-06-14 18:41:25	36.505	110	84135.4	554.873	10567.2	111.133	1.77465e+06	19444.2	0.049468	0.00028824	0.125274	0.00131901		22.2481	0.516406	0.125612	0.000659628	0.102024
WC-1_014		2023-06-14 18:42:52	36.506	110	82093.4	486.19	9625.65	173.725	1.72248e+06	10612.5	0.0496665	0.000275542	0.117544	0.00182488		22.1639	0.514073	0.117266	0.000912616	-0.0546608
WC-1_015		2023-06-14 19:34:31	36.505	110	93215.1	398.858	11670.9	177.095	2.02717e+06	7487.43	0.0475951	0.000238124	0.125397	0.00204726		23.2624	0.538831	0.125218	0.000986973	-0.116417
WC-1_016		2023-06-14 19:35:58	36.503	110	99914.2	520.322	12741.1	129.375	2.16862e+06	17813.1	0.0480435	0.000237608	0.12805	0.00108657		23.0477	0.533787	0.127536	0.000543328	0.154127
WC-1_017		2023-06-14 20:27:49	36.506	110	102607	659.389	10721.8	105.233	2.33843e+06	26601.8	0.0456177	0.000237415	0.104714	0.00118279		24.3092	0.563348	0.104506	0.000591234	0.00165634
WC-1_018		2023-06-14 20:29:16	16.0692	110	65767.8	979.11	7229.7	281.642	1.46883e+06	15431.6	0.0477698	0.000725628	0.112542	0.00424885		23.2135	0.562877	0.109941	0.00212385	-0.0278471
WC-1_019		2023-06-14 21:20:57	36.505	110	113150	1757.92	13248.7	313.285	2.52373e+06	42023.8	0.0465427	0.000223479	0.116136	0.00142388		23.7406	0.549655	0.117103	0.000711909	-0.0984246
WC-1_020		2023-06-14 21:22:24	36.51	110	92846.4	757.071	13378.6	203.075	1.94575e+06	11774.8	0.0496017	0.000406198	0.14312	0.00149586		22.2726	0.520932	0.144111	0.00074793	-0.401172
WC-1_021		2023-06-14 22:12:26	36.507	110	82395.1	491.536	9821.37	144.319	1.71394e+06	19167.8	0.0498632	0.000270871	0.119392	0.00147429		21.9629	0.509261	0.119213	0.000737252	-0.0102681
WC-1_022		2023-06-14 22:13:53	36.515	110	92209.2	654.818	13256.2	136.201	1.8532e+06	22210.8	0.0516395	0.000291946	0.144739	0.00142677		21.2004	0.491861	0.143779	0.000713459	0.148113
WC-1_023		2023-06-14 23:05:26	36.504	110	92590.9	558.18	10707.1	142.367	1.97395e+06	18548.8	0.0487138	0.000252491	0.116008	0.00134561		22.1438	0.513139	0.115653	0.000672865	-0.145202
WC-1_024		2023-06-14 23:07:06	23.4284	110	79216.6	615.822	8925.96	149.743	1.66465e+06	13857.3	0.0484834	0.000321256	0.111857	0.00149677		22.2361	0.517318	0.112691	0.00074847	0.0182972
WC-1_025		2023-06-14 23:58:35	36.506	110	94132	418.621	12848.1	139.123	1.94564e+06	9316.01	0.0503931	0.00024838	0.13667	0.00159682		20.9529	0.485252	0.136506	0.000798279	-0.0485082
WC-1_026		2023-06-15 00:00:02	36.503	110	89607	703.113	11543.3	233.353	1.96658e+06	18764.5	0.0473126	0.000231509	0.128619	0.00196941		22.3021	0.516457	0.128837	0.000984531	0.00676003
WC-1_027		2023-06-15 00:51:51	36.51	110	87135	409.064	10856.1	143.858	1.95028e+06	12620	0.0464967	0.00021884	0.124779	0.00153993		22.0894	0.511317	0.124604	0.000770136	0.0779345
WC-1_028		2023-06-15 00:53:18	23.6826	110	86051.7	568.818	9436.35	182.697	2.00603e+06	16487.9	0.0452445	0.000298462	0.108949	0.00189648		22.6817	0.527637	0.109672	0.000948468	-0.413615
WC-1_029		2023-06-15 01:45:19	36.504	110	52316.5	270.217	5895.46	86.338	1.29449e+06	7386.9	0.0420617	0.000229349	0.112553	0.00180945		23.6079	0.547433	0.112702	0.000874966	0.131481
WC-1_030		2023-06-15 01:46:46	36.507	110	79162.5	697.609	10807.1	167.574	1.84393e+06	28735	0.0446589	0.000268036	0.135881	0.00180665		22.2128	0.515835	0.136534	0.000903168	-0.000619499
WC-1_031		2023-06-15 02:37:14	36.506	110	82274.6	1157.07	9487.16	256.136	2.00894e+06	33136.6	0.0418729	0.000346642	0.114333	0.00231405		22.8298	0.534143	0.115325	0.00115696	-0.580372
WC-1_032		2023-06-15 02:38:42	8.7723	110	64513.7	646.509	7521.24	200.619	1.73467e+06	11405	0.0403305	0.000395299	0.116519	0.00331431		23.6762	0.557417	0.116598	0.00165706	0.00458338
WC-1_033		2023-06-15 02:38:51	3.86672	110	109076	11695	35785.6	7047.53	1.67552e+06	26639	0.0681152	0.00699727	0.312129	0.0310967		14.0168	0.788996	0.328117	0.0155475	-0.966978	x
WC-1_034		2023-06-15 02:38:57	8.3571	110	64130.2	546.312	7857.69	186.267	1.59227e+06	13617.2	0.0412537	0.00047208	0.122864	0.00283159		23.1416	0.5491	0.122542	0.00141572	-0.0867994
WC-1_035		2023-06-15 02:39:06	3.61725	110	76553	2645.57	16516.2	1780.81	1.52711e+06	19877.2	0.0507126	0.00192902	0.213501	0.0168742		18.823	0.562176	0.215775	0.00843668	-0.816357	x
WC-1_036		2023-06-15 02:39:12	6.92268	110	63634	644.168	7084.11	204.656	1.53648e+06	13047.4	0.0418803	0.000573709	0.110719	0.00310457		22.7911	0.547551	0.111339	0.0015522	0.3755
WC-1_037		2023-06-15 03:04:00	36.506	110	65827	541.246	7824.05	114.389	1.67223e+06	16385.3	0.0407861	0.000189685	0.118651	0.00153282		22.9436	0.531026	0.118872	0.000766439	0.067857
WC-1_038		2023-06-15 03:05:27	36.506	110	47982.5	577.239	6131.96	178.022	1.24189e+06	16778.6	0.0404576	0.000273123	0.126048	0.00253379		23.1025	0.537682	0.127811	0.00126695	-0.542578
WC-1_039		2023-06-15 03:37:15	36.508	110	70445.9	493.561	8476.51	102.363	1.69643e+06	17012.6	0.0428172	0.000231323	0.121661	0.00148804		21.2555	0.492821	0.120341	0.000743972	-0.193963
C_RA138
RA-138_001		2023-06-26 18:36:59	36.503	110	31500	851.628	10625	627.49	490764	6664.4	0.072049	0.00172885	0.333123	0.011467		12.6605	0.285871	0.337479	0.00573224	-0.870071
RA-138_002		2023-06-26 18:38:30	36.506	110	23072.6	240.271	3798.08	109.275	491087	5644.91	0.0529913	0.000460148	0.163816	0.00425059		17.2138	0.33765	0.164701	0.00212487	-0.0350653
RA-138_003		2023-06-26 18:40:01	36.506	110	25571.8	242.163	4680.94	130.859	522967	5556.03	0.0552128	0.000490375	0.182553	0.00443022		16.5214	0.324433	0.183147	0.00221469	-0.296657
RA-138_004		2023-06-26 18:41:32	36.504	110	28373.8	431.693	9394.23	243.333	452723	5640.14	0.0696963	0.00103983	0.329067	0.00669822		13.0882	0.268721	0.331261	0.0033485	-0.34672
RA-138_005		2023-06-26 18:43:04	36.503	110	23743.8	215.944	2831.37	101.978	529555	5521.93	0.0503043	0.000380411	0.119571	0.00398945		18.1337	0.353581	0.119309	0.0019944	-0.397343
RA-138_006		2023-06-26 18:44:35	36.503	110	23928.2	274.119	4483.04	174.902	494339	4472.99	0.0544596	0.000574704	0.185329	0.00545181		16.7502	0.332372	0.187452	0.00272548	-0.497585
RA-138_007		2023-06-26 18:57:14	36.504	110	28246.8	601.255	7689.68	571.553	511774	4531.53	0.0624891	0.00159716	0.267225	0.0130808		14.5986	0.335837	0.272374	0.00654014	-0.851024
RA-138_008		2023-06-26 19:50:31	36.508	110	27816.8	666.828	5729.29	415.293	546091	4808.73	0.0568262	0.00111855	0.200978	0.00849778		16.0569	0.345415	0.206073	0.00425032	-0.871072
RA-138_009		2023-06-26 20:45:44	36.504	110	24715.3	465.667	7115.78	308.362	425326	3393.65	0.0652198	0.00107851	0.287416	0.00802946		13.9936	0.291613	0.288061	0.0040154	-0.614741
RA-138_010		2023-06-26 21:38:58	36.507	110	26279.3	303.07	5811.49	197.478	505351	3552.86	0.0585851	0.000673746	0.218598	0.00583311		15.5818	0.311232	0.221259	0.00291605	-0.393658
RA-138_011		2023-06-26 22:33:35	36.514	110	28177.3	405.569	5971.92	215.803	550279	5177.31	0.057469	0.000641431	0.208977	0.0053356		15.888	0.316583	0.212052	0.00266815	-0.34595
RA-138_012		2023-06-26 23:23:15	36.503	110	27456.6	483.221	6427.13	228.554	507183	5305.14	0.0606736	0.000925159	0.235959	0.00594195		15.0519	0.309947	0.234206	0.00297137	-0.52285
RA-138_013		2023-06-27 00:16:11	36.504	110	29670.1	735.637	6053.7	141.956	588842	21493.1	0.0570753	0.000642443	0.2012	0.00619974		16.0043	0.319114	0.204141	0.00309945	-0.567543
RA-138_014		2023-06-27 01:10:49	36.505	110	25651.6	186.912	3669.62	81.1085	551945	3437.82	0.0523334	0.000405702	0.142202	0.00279076		17.4584	0.34074	0.143131	0.00139485	-0.0196759
RA-138_015		2023-06-27 02:05:27	36.504	110	27436.9	241.089	5567.76	106.901	539074	4827.31	0.0574275	0.000466158	0.204177	0.00372491		15.9133	0.311174	0.203037	0.00186205	-0.0955907
RA-138_016		2023-06-27 02:59:07	36.503	110	26954.8	262.063	5410.72	139.522	536778	4739.79	0.0565299	0.000446	0.199639	0.00437363		16.1696	0.315808	0.200839	0.00218783	-0.0330523
RA-138_017		2023-06-27 03:54:39	36.518	110	24857.6	239.811	2656.8	74.7082	559663	6166.84	0.0499497	0.00039377	0.106453	0.0027194		18.3039	0.357482	0.106937	0.00136043	-0.00625121
RA-138_018		2023-06-27 04:44:51	36.504	110	21514.3	173.045	1953.79	42.3105	498700	4789.36	0.048645	0.000362182	0.0910106	0.0020161		18.7987	0.366336	0.0908615	0.00100788	0.260558
RA-138_019		2023-06-27 05:38:16	36.52	110	23545.5	206.783	3308.5	61.9373	518044	5309.15	0.0512225	0.000404846	0.140698	0.00254084		17.8566	0.348784	0.140589	0.00126958	0.219756
RA-138_020		2023-06-27 06:33:34	36.505	110	25265.8	510.479	9462.44	279.893	369346	8596.04	0.0778641	0.00104645	0.378135	0.00733585		11.7496	0.238216	0.374713	0.00366819	-0.274895
RA-138_021		2023-06-27 07:28:34	36.504	110	22907	213.182	2798.33	92.1279	520550	3998.37	0.0495716	0.000432127	0.121153	0.00348531		18.4597	0.362156	0.122225	0.00174298	-0.0719449
RA-138_022		2023-06-27 08:21:33	36.503	110	35713.2	3047.93	14904.5	2879.6	506323	6279.94	0.0812514	0.00704992	0.330102	0.0208057		11.2647	0.534097	0.417557	0.0104049	-0.967397
RA-138_023		2023-06-27 09:13:40	36.51	110	25403.8	236.397	3297.44	194.716	571908	4889.03	0.0500166	0.000500026	0.126592	0.00587802		18.3033	0.361871	0.129869	0.00293909	-0.164048
RA-138_024		2023-06-27 09:20:22	36.507	110	22546.7	216.818	3068.19	107.295	491998	5256	0.0515989	0.000428167	0.13579	0.00410115		17.7425	0.347279	0.136153	0.00205055	-0.376422
RA-138_025		2023-06-27 09:21:53	36.506	110	23891	212.861	3722.71	164.583	510541	5787.77	0.0529131	0.000640755	0.155306	0.00601879		17.302	0.347145	0.155903	0.00300931	-0.637796
RA-138_026		2023-06-27 09:23:24	36.505	110	21342	193.379	1776.19	49.6419	509510	4878.71	0.0472722	0.000374176	0.082816	0.0020427		19.3667	0.378302	0.0832685	0.00102132	-0.0783456
RA-138_027		2023-06-27 09:24:57	36.506	110	20185.4	337.016	4965.69	123.946	372895	5030.57	0.0599963	0.000681214	0.245086	0.00524786		15.2595	0.304475	0.246133	0.00262381	-0.17228
RA-138_028		2023-06-27 09:26:28	36.505	110	23821.7	410.522	7993.39	203.767	382570	5004.41	0.0700201	0.000981403	0.341601	0.00778819		13.0751	0.266363	0.335727	0.00389389	-0.537018
RA-138_029		2023-06-27 09:27:59	36.504	110	28989.3	1154.14	9292.04	734.096	436919	6553.91	0.0718133	0.00260882	0.315448	0.0134		12.7487	0.336291	0.320702	0.00669953	-0.862531
RA-138_030		2023-06-27 09:29:30	36.51	110	11131.1	296.685	2774.31	96.3267	210968	10627.8	0.0605356	0.0011068	0.244613	0.00870533		15.1238	0.320636	0.249369	0.00435231	-0.605485
C_WC1
WC-1_001		2023-06-26 18:46:21	36.506	110	12838.4	222.626	1768.73	57.2629	341505	4371.65	0.0423368	0.000604416	0.137953	0.00350536		21.5466	0.439916	0.137841	0.00175244	0.105679
WC-1_002		2023-06-26 18:47:52	36.506	110	20015	209.95	2802.48	74.1655	553685	4572.09	0.040693	0.000378118	0.139459	0.00313866		22.4171	0.441272	0.140093	0.00156913	0.00722433
WC-1_003		2023-06-26 18:49:24	36.503	110	20251.5	155.805	2800.1	52.533	574461	4809.97	0.0398037	0.000333594	0.138422	0.00252823		22.9181	0.448785	0.138339	0.00126397	0.109237
WC-1_004		2023-06-26 18:50:55	36.504	110	18474.2	195.697	3046.89	76.369	480599	5384.41	0.0433237	0.000408981	0.164871	0.00374015		21.0562	0.414854	0.165013	0.00186989	0.0862216
WC-1_005		2023-06-26 18:52:26	36.505	110	18418.2	171.912	2778.5	60.9704	517377	4468.29	0.0401023	0.00034091	0.150849	0.00311131		22.7477	0.445742	0.150935	0.00155552	0.167352
WC-1_006		2023-06-26 18:53:57	36.504	110	23772.7	222.159	2953.07	62.0123	691628	6018.4	0.0387038	0.000317488	0.124334	0.00243861		23.5698	0.461103	0.124286	0.00121922	0.0958579
WC-1_007		2023-06-26 18:55:28	36.504	110	20889.7	188.568	2778.23	72.5296	621824	5947.84	0.0378318	0.000268482	0.132904	0.00306603		24.1133	0.469119	0.133065	0.00153292	0.0703324
WC-1_008		2023-06-26 19:48:46	36.51	110	20871.7	163.623	2157.15	64.4513	590558	5239.77	0.0397629	0.000327248	0.103947	0.00307627		22.9472	0.448988	0.103407	0.00153864	-0.232954
WC-1_009		2023-06-26 20:43:58	36.508	110	21597.5	170.361	2691.34	78.8968	607139	5452.76	0.0401002	0.000301446	0.124796	0.00371348		22.7594	0.443677	0.124679	0.00185708	-0.0109224
WC-1_010		2023-06-26 21:37:13	36.513	110	14302.5	127.832	1982.22	47.5383	384423	3200.66	0.0419587	0.000382363	0.138152	0.00317549		21.7561	0.427804	0.138665	0.00158748	0.205908
WC-1_011		2023-06-26 22:31:50	36.507	110	21043	236.919	2526.91	141.003	585218	8666.5	0.0406934	0.00053707	0.119496	0.00593406		22.4376	0.454019	0.120146	0.00296741	-0.603629
WC-1_012		2023-06-26 23:21:29	36.506	110	21983.2	242.751	3289.94	79.682	603879	6951.68	0.0409775	0.000323895	0.149496	0.00292846		22.2865	0.435312	0.149735	0.00146443	0.0513816
WC-1_013		2023-06-27 00:14:25	36.505	110	23812.2	218.354	2718.15	72.4161	681173	6504.15	0.0393676	0.000284008	0.114037	0.00266721		23.203	0.45166	0.114209	0.00133344	0.124745
WC-1_014		2023-06-27 01:09:03	36.509	110	14080.2	134.393	3136.66	60.8467	327160	3240.78	0.0485351	0.000510154	0.224041	0.00468638		18.8245	0.373429	0.222888	0.00234231	0.105704
WC-1_015		2023-06-27 02:03:41	36.504	110	20303.9	361.7	2730.37	67.175	544499	11831.6	0.0417979	0.000474838	0.136402	0.0030604		21.8637	0.436269	0.134546	0.00152985	-0.294796
WC-1_016		2023-06-27 02:57:21	36.506	110	20527.1	151.563	2854.97	62.9022	550022	3966.16	0.0420247	0.000357371	0.139085	0.00318158		21.7505	0.426209	0.139156	0.00159151	0.127101
WC-1_017		2023-06-27 03:52:53	36.504	110	17399.7	193.377	2428.82	49.5722	472262	7165.5	0.0416728	0.000391807	0.139496	0.00268966		21.9391	0.43215	0.139663	0.00134557	0.414636
WC-1_018		2023-06-27 04:43:06	36.506	110	21497.1	205.49	2698.38	68.2772	607121	7238.4	0.0400202	0.000313545	0.125555	0.0028459		22.8498	0.446154	0.125588	0.00142276	-0.033963
WC-1_019		2023-06-27 05:36:30	36.504	110	19564.1	195.098	2776.92	79.4666	537891	5214.51	0.0408774	0.000360988	0.141234	0.00338201		22.3755	0.439265	0.142014	0.00168986	0.0646437
WC-1_020		2023-06-27 06:31:48	36.504	110	15196.5	156.295	2050.02	50.5228	406196	4082.59	0.042175	0.000399206	0.135086	0.00322028		21.692	0.427447	0.134971	0.00161022	0.176487
WC-1_021		2023-06-27 07:26:48	36.506	110	12425.3	145.163	2240.75	74.7049	310425	2004.93	0.0454496	0.000567446	0.178698	0.00470764		20.1337	0.405117	0.180432	0.00235426	-0.243123
WC-1_022		2023-06-27 08:19:47	36.51	110	14095.5	175.736	1646.59	41.4316	390380	5855.41	0.040704	0.000376671	0.117606	0.00310438		22.486	0.442527	0.116878	0.0015525	0.0899778
WC-1_023		2023-06-27 09:11:54	36.511	110	12318.9	154.571	1840.86	64.3004	329148	2803.03	0.0421105	0.000540194	0.148566	0.00433317		21.7395	0.438599	0.149513	0.00216667	-0.14006
WC-1_024		2023-06-27 09:31:16	36.504	110	19692.3	197.318	2734.53	59.8119	541860	5260.91	0.0409824	0.000336416	0.139412	0.00279629		22.3398	0.437052	0.138936	0.00139802	0.167065
WC-1_025		2023-06-27 09:32:48	36.506	110	18023.3	141.596	2034.61	49.8292	506550	3901.72	0.0400325	0.000303216	0.113093	0.00279376		22.8699	0.445959	0.112947	0.00139674	0.0748996
WC-1_026		2023-06-27 09:34:20	36.504	110	16745.6	143.079	1807.92	42.6297	475795	3284.41	0.0396117	0.000303706	0.107994	0.00264244		23.113	0.450908	0.108021	0.00132107	0.131373
WC-1_027		2023-06-27 09:35:51	36.504	110	15656.7	141.768	1892.99	53.8742	436740	4931.1	0.040402	0.000358675	0.121797	0.00352486		22.6611	0.44499	0.120969	0.00176221	0.0490212
WC-1_028		2023-06-27 09:37:22	36.504	110	15573.9	131.346	1868.08	46.9889	436961	3122.49	0.0401035	0.00037011	0.119481	0.00295205		22.8299	0.449229	0.120013	0.00147583	0.202905
WC-1_029		2023-06-27 09:38:54	36.506	110	21277.8	166.975	2602.75	55.8125	579232	5187.51	0.0414246	0.000316783	0.122849	0.00270744		22.1019	0.43114	0.122387	0.00135352	0.0485555
WC-1_030		2023-06-27 09:40:25	36.504	110	17913.1	147.135	1831.17	42.5877	510170	4976.07	0.0395304	0.000337315	0.102475	0.0024189		23.1612	0.453925	0.102279	0.00120926	0.180267
RA138
RA138_001		2023-07-28 10:49:25	37.003	110	88125.5	525.398	19714	326.451	1.28523e+06	7670.08	0.0706022	0.000483135	0.223509	0.00313833		15.4218	0.287574	0.223747	0.00156902	0.0582103
RA138_002		2023-07-28 10:50:58	37.004	110	114013	1222.32	30506	763.263	1.50199e+06	17698.1	0.0775927	0.00078887	0.265833	0.00460341		14.0406	0.267086	0.267616	0.00230141	-0.702381
RA138_003		2023-07-28 10:52:32	37.004	110	103468	781.693	19141.9	279.206	1.59999e+06	16508.7	0.0670459	0.000337885	0.184395	0.0020916		16.2586	0.300834	0.185038	0.00104564	0.187518
RA138_004		2023-07-28 11:42:14	37.012	110	94394.6	883.199	16692.8	314.392	1.45268e+06	16131.3	0.0671156	0.000337726	0.176025	0.00223151		16.4844	0.305004	0.176874	0.0011159	-0.0522418
RA138_005		2023-07-28 11:43:46	37.003	110	91455.7	647.418	15937	268.096	1.42801e+06	11181	0.0660578	0.00038499	0.173944	0.0021769		16.7544	0.310976	0.174293	0.00108862	0.189785
RA138_006		2023-07-28 11:45:19	37.004	110	98477	551.292	21391.6	333.218	1.42346e+06	7693.81	0.0715455	0.000390064	0.21702	0.00273088		15.4749	0.286785	0.217266	0.00136568	-0.275531
RA138_007		2023-07-28 12:29:58	37.004	110	98317.8	754.333	19385	427.704	1.45166e+06	9159.76	0.0696899	0.000433869	0.198271	0.00338291		16.019	0.297842	0.197205	0.00169127	-0.301093
RA138_008		2023-07-28 12:31:29	37.006	110	92662.9	537.026	13563.6	177.734	1.47954e+06	10046.6	0.0643437	0.000306746	0.147159	0.00160263		17.3537	0.320784	0.146404	0.00080121	0.0374326
RA138_009		2023-07-28 12:33:03	37.004	110	100836	677.775	18871.2	296.108	1.48524e+06	11274.6	0.0696916	0.000378203	0.188285	0.00225175		16.0256	0.296962	0.187183	0.0011257	-0.256981
RA138_010		2023-07-28 13:22:32	37.016	110	100621	496.034	15732.3	148.886	1.5738e+06	12295.2	0.0660678	0.00033851	0.156588	0.00147254		16.9944	0.314546	0.156382	0.000736192	0.0855207
RA138_011		2023-07-28 13:24:03	37.006	110	101311	500.32	17129.6	154.235	1.55941e+06	10701.3	0.0670978	0.000287324	0.169166	0.00142495		16.7354	0.308858	0.169112	0.00071238	0.243318
RA138_012		2023-07-28 13:25:36	37.017	110	104551	630.161	22672.2	252.301	1.49999e+06	14778	0.0719147	0.000379577	0.216777	0.00242793		15.6163	0.289209	0.216895	0.00121378	-0.0306896
RA138_013		2023-07-28 14:10:33	37.004	110	101647	600.931	15275	144.636	1.60087e+06	13130	0.065564	0.000280338	0.150847	0.00147885		17.1721	0.316911	0.150304	0.000739577	0.17318
RA138_014		2023-07-28 14:12:07	37.004	110	103332	705.638	18669.2	322.283	1.55403e+06	9266.37	0.0687989	0.000371451	0.18063	0.0023172		16.3657	0.303231	0.180707	0.00115884	-0.457412
RA138_015		2023-07-28 14:13:40	37.003	110	93811.4	440.606	14071.9	131.907	1.47333e+06	11014.7	0.0655059	0.000309826	0.149903	0.00146797		17.1895	0.317706	0.150031	0.000734168	0.0934723
RA138_016		2023-07-28 14:58:32	37.005	110	98154.6	583.585	16807.9	231.282	1.45618e+06	12612.9	0.0695596	0.000405665	0.171268	0.00195532		16.2088	0.300854	0.171272	0.000977594	-0.447564
RA138_017		2023-07-28 15:00:05	37.004	110	95358.9	462.442	20866.9	247.847	1.35007e+06	6008.69	0.0727677	0.000425293	0.220031	0.00240274		15.4947	0.287615	0.218867	0.00120129	-0.2981
RA138_018		2023-07-28 15:01:37	37.004	110	93953.4	666.436	13650.4	259.813	1.47602e+06	10988.3	0.0653988	0.000392509	0.145244	0.00214212		17.2412	0.320249	0.145317	0.00107098	-0.654672
RA138_019		2023-07-28 15:51:12	37.006	110	96559.4	425.515	16941.4	160.893	1.45399e+06	11946.6	0.0684849	0.000394193	0.17625	0.00179368		16.4798	0.305786	0.175484	0.000896682	-0.23464
RA138_020		2023-07-28 15:52:46	37.006	110	95002.8	520.832	14345.9	181.455	1.47885e+06	9569.81	0.0664484	0.000297346	0.15149	0.00144249		16.9854	0.313664	0.151034	0.00072112	-0.0175214
RA138_021		2023-07-28 15:54:18	37.004	110	97992.2	842.152	15215.1	296.634	1.51967e+06	14273.6	0.0662339	0.00039093	0.155691	0.00231295		17.0409	0.316393	0.155299	0.00115626	-0.451694
RA138_022		2023-07-28 16:38:58	37.004	110	94293.3	537.749	15808	182.71	1.42221e+06	10273.9	0.0682096	0.000328824	0.169046	0.0016807		16.5645	0.306253	0.167679	0.000840674	0.054202
RA138_023		2023-07-28 16:40:29	37.003	110	93231.2	553.683	16277.2	168.04	1.3994e+06	10703	0.0686738	0.000323476	0.174541	0.00147409		16.4533	0.304079	0.174623	0.000737338	0.126368
RA138_024		2023-07-28 16:42:03	37.004	110	96001.9	633.213	16192.8	220.703	1.45492e+06	12422.3	0.0685971	0.000310937	0.168348	0.00165839		16.4724	0.30425	0.168704	0.00082953	-0.178888
RA138_025		2023-07-28 17:31:45	37.004	110	99710.8	760.45	17536.9	296.333	1.50821e+06	15166.2	0.0675013	0.000419782	0.176053	0.00224927		16.7716	0.311826	0.175911	0.00112452	-0.463608
RA138_026		2023-07-28 17:33:18	37.004	110	101379	947.453	24172.9	696.77	1.39158e+06	4976.64	0.0748698	0.000664913	0.238031	0.00516358		15.1221	0.285216	0.238487	0.00258157	-0.781015
RA138_027		2023-07-28 17:34:52	37.007	110	97056	441.065	16806.6	148.46	1.46745e+06	10422.9	0.0682044	0.000297735	0.172882	0.00146563		16.6012	0.306461	0.173197	0.000732768	0.0443918
RA138_028		2023-07-28 17:47:37	39.5751	110	78327.6	2610.04	15353.2	326.784	1.11021e+06	41692.5	0.0733133	0.000520799	0.199818	0.00418489		15.4545	0.288562	0.19605	0.00209264	-0.521525
RA138_029		2023-07-28 17:49:12	37.004	110	88802.6	677.694	19558	369.294	1.24243e+06	8326.49	0.0732504	0.00049591	0.22069	0.00308988		15.4692	0.288355	0.220283	0.00154509	-0.516846
RA138_030		2023-07-28 17:50:43	37.022	110	87693.3	748.022	21697.9	642.08	1.16891e+06	5156.37	0.0775473	0.000689883	0.245507	0.00552943		14.6132	0.275645	0.247477	0.00276502	-0.666175
C_WC1
WC-1_001		2023-07-28 10:44:53	30.7639	110	92271.4	571.636	10547.6	123.61	2.01835e+06	19682	0.0467395	0.000244529	0.114588	0.00118139		23.2548	0.430594	0.114333	0.000590701	0.0263102
WC-1_002		2023-07-28 10:46:20	35.8852	110	73748.3	646.996	5903.26	123.287	1.678e+06	14584	0.0452909	0.000264698	0.080782	0.00160749		24.0121	0.445715	0.0800614	0.000803732	-0.102135
WC-1_003		2023-07-28 10:47:52	34.9688	110	63447.3	744.833	6432.51	88.4829	1.37136e+06	19294.5	0.0476882	0.000253882	0.100918	0.00121509		22.8184	0.422664	0.101403	0.000607502	0.180071
WC-1_004		2023-07-28 11:37:32	35.1836	110	67746.6	454.866	7601.95	140.739	1.52172e+06	10784.3	0.0457802	0.000279197	0.112734	0.00181352		24.1394	0.448572	0.112233	0.000906826	-0.0172913
WC-1_005		2023-07-28 11:39:07	36.1229	110	49983.3	407.295	5591.48	114.662	1.073e+06	7528.73	0.0477422	0.000284075	0.112259	0.00226537		23.1564	0.430027	0.111888	0.00113279	-0.21802
WC-1_006		2023-07-28 11:40:39	37.004	110	68663.2	344.919	9102.15	141.74	1.42495e+06	8798.53	0.04937	0.000249534	0.13222	0.00176439		22.4011	0.414512	0.132588	0.000882288	0.0217284
WC-1_007		2023-07-28 12:25:09	37.009	110	69940.6	334.849	8396.15	87.3758	1.4584e+06	8351.56	0.0493071	0.000246899	0.120655	0.00116627		22.6246	0.418576	0.12007	0.000583137	0.20534
WC-1_008		2023-07-28 12:26:47	28.8549	110	73361.5	445.497	6171.39	100.426	1.59624e+06	14695.9	0.0474144	0.00029533	0.0844221	0.00123686		23.5337	0.43757	0.0841392	0.000618404	0.000750782
WC-1_009		2023-07-28 12:28:25	28.2351	110	104818	623.555	13312	187.18	2.11231e+06	14774.3	0.0511593	0.000284044	0.127654	0.00149883		21.8163	0.404467	0.127026	0.000749363	0.108482
WC-1_010		2023-07-28 13:17:46	34.0612	110	69304.2	828.65	6551.87	424.861	1.50587e+06	13990.1	0.0473017	0.000466736	0.0927861	0.00488006		23.7275	0.45042	0.094556	0.00243991	-0.832978
WC-1_011		2023-07-28 13:19:20	37.012	110	74726.2	1114.02	10714.1	378.236	1.47238e+06	21134	0.0524088	0.000527385	0.144482	0.00361835		21.4181	0.407129	0.143405	0.00180906	-0.337217
WC-1_012		2023-07-28 13:20:56	37.006	110	85388.3	653.822	10900.4	190.638	1.79396e+06	15945.5	0.0492164	0.000225088	0.127628	0.00162903		22.8103	0.421369	0.127681	0.000814456	-0.207325
WC-1_013		2023-07-28 14:05:46	37.006	110	76092.8	560.601	9616.73	190.223	1.54178e+06	16131.9	0.0509726	0.000299327	0.126227	0.00199585		22.0834	0.409964	0.126406	0.000998033	-0.111162
WC-1_014		2023-07-28 14:07:31	28.9524	110	63278.7	1054.6	7439.78	362.089	1.23796e+06	17531.7	0.0516305	0.000500288	0.115283	0.00406731		21.8036	0.4134	0.117594	0.00203395	-0.614959
WC-1_015		2023-07-28 14:09:08	21.7251	110	130952	1833.53	7862.98	145.619	2.86334e+06	33811.4	0.0465088	0.00027868	0.0603032	0.000868596		24.2064	0.449607	0.0600562	0.000434374	0.137921
WC-1_016		2023-07-28 14:53:53	37.014	110	44934.4	764.736	4700.3	170.343	932756	16677.3	0.0496678	0.000312014	0.103888	0.00268513		22.698	0.422133	0.104624	0.00134252	-0.204965
WC-1_017		2023-07-28 14:55:24	37.006	110	95201.9	627.002	15141.9	257.347	1.86233e+06	15940.6	0.052447	0.000345772	0.159145	0.00221702		21.4959	0.400356	0.159081	0.00110846	-0.114586
WC-1_018		2023-07-28 14:56:57	37.008	110	65646.1	663.96	6487.87	199.845	1.38295e+06	14558.8	0.0491432	0.000303548	0.0979601	0.00216922		22.9419	0.426467	0.0988499	0.00108456	-0.668946
WC-1_019		2023-07-28 15:46:28	37.01	110	25865.3	214.467	3404.65	77.9094	529589	2586.22	0.0503505	0.000435945	0.131604	0.00279975		22.4132	0.422151	0.131655	0.00139967	-0.0869247
WC-1_020		2023-07-28 15:48:05	37.005	110	57332.2	395.402	5071.19	118.558	1.24551e+06	8748.25	0.0473348	0.000270109	0.088219	0.00174778		23.8418	0.442299	0.0884697	0.000873755	-0.217752
WC-1_021		2023-07-28 15:49:38	37.009	110	67848	563.188	5986.82	196.995	1.45297e+06	12745.8	0.0480336	0.000304794	0.0874912	0.0024338		23.4957	0.437095	0.0882557	0.0012167	-0.0640104
WC-1_022		2023-07-28 16:34:19	37.016	110	60143.4	329.717	7108.92	92.6017	1.23759e+06	7266.97	0.0501801	0.000261989	0.118005	0.00131938		22.5132	0.416845	0.118222	0.000659912	0.0047081
WC-1_023		2023-07-28 16:35:51	37.005	110	59830.8	640.072	6154.69	123.12	1.25198e+06	16882.8	0.0493898	0.000254761	0.102066	0.00141895		22.8744	0.423433	0.102888	0.000709723	0.183687
WC-1_024		2023-07-28 16:37:24	37.004	110	68832.1	371.812	7320.78	107.695	1.4394e+06	9123.39	0.0492	0.000234634	0.106909	0.0015269		22.9636	0.424485	0.106377	0.000763731	-0.278635
WC-1_025		2023-07-28 17:28:33	37.004	110	54487.9	450.046	8294.33	289.324	1.16314e+06	8666.68	0.0483974	0.000375551	0.14757	0.00379286		23.3883	0.438222	0.152253	0.00189615	-0.569436	x
WC-1_026		2023-07-28 17:30:09	37.03	110	74220.3	426.831	8896.9	107.525	1.6108e+06	11592	0.0479984	0.000270104	0.119726	0.00139298		23.5845	0.437383	0.119894	0.000696404	0.135846
WC-1_027		2023-07-28 17:42:55	37.009	110	77403.2	590.191	8579.72	145.97	1.65358e+06	10631.7	0.0481626	0.00041519	0.109671	0.00128182		23.519	0.442878	0.110866	0.000640938	-0.484577
WC-1_028		2023-07-28 17:44:35	32.8255	110	59570.5	355.863	5411.35	95.2497	1.24526e+06	10797.8	0.0490413	0.000324201	0.0906576	0.00157372		23.0997	0.430262	0.0908568	0.000786908	0.0886145
WC-1_029		2023-07-28 17:46:09	30.5606	110	70233.2	595.739	8077.19	197.247	1.50399e+06	14789.8	0.0477548	0.000273603	0.115223	0.00249235		23.7239	0.440155	0.115027	0.00124626	0.244658

## Sheet: S2b All Data for Figure 2a
Identifier		Start time	Duration (s)	Spot Size (µm)	Pb206_CPS_mean	Pb206_CPS_2SE(int)	Pb207_CPS_mean	Pb207_CPS_2SE(int)	U238_CPS_mean	U238_CPS_2SE(int)	DC Pb206/U238_mean	DC Pb206/U238_2SE(int)	Pb207/Pb206_mean	Pb207/Pb206_2SE(int)		corr 238/206	1SE prop	ROM 207/206 corr	1SE	err corr		omit
RA138 - 1		2022-11-25 14:54:11	37.516	110	54403.7	502.069	20534.3	434.896	679732	8080.35	0.0809733	0.0012459	0.377511	0.0053936		11.8595	0.220976	0.377944	0.0026968	0.930523
RA138 - 1		2022-11-27 11:05:37	37.498	110	53202.1	330.398	9533.17	130.417	959462	7646.27	0.0598961	0.000310386	0.180378	0.00208272		16.0832	0.270149	0.180378	0.00104148	-0.173643
RA138 - 1		2022-11-28 20:59:44	37.026	110	42300.7	338.314	7468.69	153.931	810871	9137.15	0.0535595	0.00038982	0.176871	0.00350464		16.5343	0.291972	0.176871	0.00175216	-0.235034
RA138 - 1		2022-12-22 15:16:26	37.504	110	42629.5	514.649	8725.19	289.423	768525	8961.84	0.0572176	0.000601761	0.203149	0.00516788		16.1681	0.301339	0.204726	0.00258428	0.427206
RA138 - 1		2023-01-03 22:41:44	37.503	110	60540.4	454.684	11871.7	232.436	994970	6842.72	0.062009	0.00047917	0.195924	0.00312481		15.8889	0.308599	0.196449	0.000696086	0.524028
RA138 - 1		2023-01-04 12:24:56	37.507	110	62495.7	721.393	16474.6	457.156	1.00166e+06	9975.76	0.0643808	0.000687542	0.262164	0.00472473		14.2822	0.26614	0.263966	0.00105639	0.837255
RA138 - 1		2023-01-30 14:14:42	36.507	110	129512	825.429	31562.8	525.896	1.75432e+06	13046	0.0774618	0.00050396	0.00312004	0.00312004		15.7372	0.412224	0.243749	0.00155972	-0.516968		x
RA138 - 1		2023-02-02 14:00:04	36.506	110	99903.4	1547.06	20275.4	498.893	1.46057e+06	20450.9	0.0772868	0.000670287	0.203759	0.00734445		15.0484	0.308672	0.202999	0.0029502	0.534372		x
RA138 - 1		2023-02-03 13:59:59	36.503	110	117830	1497.45	29311.3	834.496	1.71207e+06	16125.7	0.0649777	0.000672712	0.246634	0.00481471		15.0888	0.437778	0.248803	0.00240735	-0.665117
RA138 - 1		2023-02-05 19:07:55	15.9472	110	87172	1369.56	11426.9	279.453	1.49299e+06	33872.9	0.0580934	0.000467464	0.131793	0.00189683		17.7067	0.292297	0.131861	0.00190515	0.368291
RA138 - 1		2023-02-10 16:19:44	36.532	110	126144	2302.4	24290.6	2138.67	2.06852e+06	14860.6	0.062896	0.00121034	0.192285	0.00923067		16.5888	0.426592	0.192486	0.00461497	-0.940995
RA138 - 1		2023-03-02 10:26:32	26.6525	110	95067.3	907.943	15104.3	376.161	1.54608e+06	12346.6	0.0628742	0.000392595	0.158685	0.00274579		16.8972	0.320721	0.158971	0.00137284	0.673789
RA138 - 1		2023-03-15 17:15:16	39.2583	110	133391	794.661	22055.8	310.781	2.34738e+06	16548.8	0.0582544	0.000328292	0.165517	0.00187243		17.1472	0.387645	0.165362	0.000936137	-0.0601545
RA138 - 1		2023-03-24 16:28:18	38.003	110	67077.3	695.395	14118	352.871	1.12246e+06	9589.53	0.0572837	0.000526892	0.211954	0.00412928		16.113	0.474268	0.210502	0.00206447	-0.714562
RA138 - 10		2022-11-26 08:53:06	37.482	110	55950.4	406.024	23075.1	305.241	626324	6368.27	0.0922479	0.0010945	0.415628	0.00448987		10.41	0.187145	0.412968	0.00224494	0.87677
RA138 - 10		2022-11-27 14:05:55	37.481	110	59375	465.163	12000.8	177.987	1.04418e+06	9663.88	0.0613333	0.0003253	0.203681	0.00242173		15.8292	0.266033	0.203681	0.0012111	-0.193887
RA138 - 10		2022-11-28 21:15:35	36.966	110	41625.1	307.881	9486.4	194.187	748305	5880.39	0.056977	0.000465801	0.227516	0.00389999		15.5395	0.275925	0.227516	0.00195014	-0.242929
RA138 - 10		2022-12-22 18:12:16	37.506	110	45902.8	376.964	6433.92	105.527	917149	8903.75	0.0517339	0.000289094	0.140094	0.00191144		17.7692	0.321581	0.140199	0.000955217	0.250598
RA138 - 10		2023-01-04 00:15:04	37.504	110	61212.7	453.933	13026.6	178.693	1.01079e+06	10061.4	0.0618452	0.000411667	0.212782	0.00240813		15.8485	0.306239	0.213193	0.000550101	0.544122
RA138 - 10		2023-01-04 15:44:34	37.504	110	59668.1	539.412	13646.7	280.039	1.05942e+06	11630.7	0.0581485	0.000478423	0.227666	0.00364011		15.7455	0.288471	0.229017	0.000803836	0.566604
RA138 - 10		2023-01-30 16:41:08	36.507	110	131208	701.147	30031.2	448.677	1.66847e+06	13007.5	0.0826946	0.000541038	0.0029257	0.0029257		14.8701	0.389546	0.228922	0.00146297	-0.451907
RA138 - 10		2023-02-02 16:11:42	36.504	110	113342	937.932	25187.1	474.573	1.58139e+06	17202.3	0.0811591	0.000565038	0.221128	0.00297786		14.925	0.303698	0.222277	0.00148883	0.738976
RA138 - 10		2023-02-03 17:34:06	36.506	110	99393.3	1332.51	18571.3	473.265	1.45708e+06	21216	0.0638086	0.000460049	0.186708	0.00351358		15.0685	0.43359	0.18688	0.00175679	-0.588491
RA138 - 10		2023-02-05 22:35:54	31.6043	110	100418	830.868	17094.4	378.573	1.63862e+06	14732.8	0.0613758	0.000470169	0.171387	0.00319355		16.6246	0.27367	0.171241	0.00201225	-0.188052
RA138 - 10		2023-02-10 20:44:46	36.527	110	152625	982.982	40740.1	748.282	2.03403e+06	15937.9	0.0778546	0.00067825	0.268497	0.00391744		14.1279	0.342494	0.266822	0.00195813	-0.70155
RA138 - 10		2023-03-02 13:52:05	23.8764	110	107057	960.79	18651.6	335.332	1.72303e+06	16747.1	0.0656619	0.000400225	0.173899	0.00224507		16.525	0.313457	0.174322	0.00112241	0.317508
RA138 - 10		2023-03-15 21:21:52	37.4933	110	133398	1735.21	33117.5	820.729	1.981e+06	25337.6	0.0691463	0.000841015	0.251829	0.00445713		14.738	0.342516	0.248282	0.00222824	-0.455371
RA138 - 10		2023-03-24 20:50:58	38.004	110	79312.6	689.581	14088.1	338.258	1.32422e+06	12217.8	0.0573619	0.00039195	0.17697	0.00317424		16.2163	0.47469	0.177651	0.00158728	-0.390338
RA138 - 11		2022-11-26 09:46:14	37.485	110	52729	561.338	11577.6	222.745	871533	10630.7	0.061945	0.000513763	0.221067	0.00299044		15.5024	0.270824	0.219858	0.00149522	0.712169
RA138 - 11		2022-11-27 14:50:01	37.487	110	64433.1	532.467	14960.3	256.177	1.07945e+06	8682.95	0.0646368	0.000420886	0.237356	0.00327557		15.0211	0.254042	0.237356	0.00163796	-0.44956
RA138 - 11		2022-11-28 21:18:34	36.978	110	43015.8	573.766	7499.23	277.782	826016	7785.22	0.0530956	0.000532428	0.174944	0.00474161		16.6755	0.30003	0.174944	0.00237102	-0.638971
RA138 - 11		2022-12-22 18:55:27	37.503	110	44584.7	594.27	11295.7	358.245	763984	6921.14	0.0600397	0.000688439	0.252446	0.00529897		15.2592	0.286528	0.253418	0.00265003	0.885474
RA138 - 11		2023-01-04 00:16:26	37.514	110	62527.5	374.087	10369.9	106.537	1.11319e+06	10221.7	0.0574269	0.000381977	0.166284	0.00175414		17.066	0.329757	0.166145	0.000400817	0.349626
RA138 - 11		2023-01-04 15:45:57	37.521	110	80968.6	2465.06	35152.4	1669.06	932205	14937.1	0.0901773	0.00262083	0.435163	0.00893481		10.1527	0.23371	0.434731	0.00197085	0.966199
RA138 - 11		2023-01-30 17:20:59	36.508	110	124877	1118.22	28253.1	597.576	1.68434e+06	18683.6	0.0781811	0.000606751	0.00361825	0.00361825		15.4667	0.406458	0.226287	0.00180941	-0.577002
RA138 - 11		2023-02-02 16:49:55	36.504	110	105577	889.136	23515	470.021	1.48502e+06	14038.8	0.0802266	0.000544373	0.222164	0.00317359		15.2189	0.309451	0.222783	0.00158684	0.644701
RA138 - 11		2023-02-03 18:25:02	36.506	110	104318	1510.97	20807.5	412.821	1.64916e+06	33011.5	0.0599358	0.000385371	0.196641	0.00294736		16.0745	0.461794	0.199498	0.00147368	-0.479
RA138 - 11		2023-02-05 23:16:26	31.7921	110	114858	1152.68	19107.5	447.321	1.87887e+06	19351.9	0.0612454	0.000375519	0.165986	0.00269349		16.5379	0.269582	0.167343	0.00211866	0.06111
RA138 - 11		2023-02-10 21:43:06	36.504	110	135013	952.524	25644.7	470.436	2.06397e+06	15324.9	0.0674468	0.000394755	0.190407	0.00275582		16.3652	0.393201	0.189867	0.00137804	-0.47317
RA138 - 11		2023-03-02 14:42:14	38.013	110	95755.1	473.865	14321	165.978	1.58244e+06	10378.1	0.0627982	0.000308277	0.149662	0.00136486		17.264	0.325987	0.149644	0.000682434	0.548907
RA138 - 11		2023-03-15 22:19:54	36.503	110	63601.9	1004.97	10149.5	352.821	1.14092e+06	17322.5	0.0569868	0.000967817	0.160683	0.00632074		17.8345	0.427744	0.159592	0.00304675	0.0779018
RA138 - 11		2023-03-24 21:53:24	38.004	110	79373.5	887.043	14703.1	498.824	1.21285e+06	9247.94	0.0625873	0.000546484	0.183221	0.00449402		14.8958	0.437912	0.185264	0.00224696	-0.686947
RA138 - 12		2022-11-26 09:47:38	37.484	110	51776.3	558.825	8981.83	129.149	931109	13355.6	0.0575097	0.000402151	0.173579	0.00207819		16.698	0.289325	0.173704	0.0010391	0.642283
RA138 - 12		2022-11-27 14:51:38	25.882	110	48267.5	853.301	15930.5	550.264	686213	14840.6	0.0747614	0.00176609	0.331157	0.00753894		12.9868	0.264541	0.331157	0.00376985	-0.573703
RA138 - 12		2022-11-28 21:19:59	37.006	110	44904.1	460.996	8995	269.273	836672	8019.18	0.054917	0.000505971	0.200363	0.00473597		16.1226	0.28832	0.200363	0.00236825	-0.621507
RA138 - 12		2022-12-22 18:56:49	37.522	110	42238.3	309.506	6554.71	107.443	838930	7921.24	0.0521183	0.000322409	0.154871	0.00224933		17.5764	0.318946	0.155223	0.00112491	0.361955
RA138 - 12		2023-01-04 00:43:20	37.504	110	58175.5	525.176	12226.5	251.432	959927	9756.93	0.0619892	0.000444493	0.209504	0.00305398		15.7733	0.305511	0.210545	0.000686589	0.617961
RA138 - 12		2023-01-04 16:35:25	37.505	110	61658.9	1047.6	17545.7	380.497	945077	22333.7	0.0666855	0.000949384	0.285772	0.00532782		13.712	0.263541	0.284942	0.00113642	0.803973
RA138 - 12		2023-01-30 17:22:22	36.506	110	137445	1731.44	29855	675.399	1.84134e+06	35675.2	0.077982	0.000979545	0.00304365	0.00304365		15.4966	0.414373	0.217252	0.00152207	0.307467
RA138 - 12		2023-02-02 16:51:17	36.506	110	108739	739.742	24299.7	460.855	1.53461e+06	14529.5	0.0799166	0.000689267	0.222312	0.00326938		15.2834	0.313415	0.223522	0.00163475	0.769092
RA138 - 12		2023-02-03 18:26:33	36.506	110	92949.5	997.675	20611.6	706.485	1.39567e+06	8331.23	0.0629448	0.000692791	0.223325	0.00589659		15.3088	0.445082	0.221789	0.0029483	-0.841171
RA138 - 12		2023-02-05 23:17:48	28.4015	110	104173	797.942	14333.5	181.382	1.76635e+06	19328.4	0.0590925	0.000371452	0.137264	0.00145621		17.1364	0.279589	0.138408	0.00101765	0.210686
RA138 - 12		2023-02-10 21:44:34	36.528	110	127107	877.952	22583.5	315.229	1.95378e+06	15758.4	0.0670614	0.000479711	0.177662	0.00201765		16.4604	0.396936	0.177602	0.00100892	0.0521192
RA138 - 12		2023-03-02 14:43:52	30.9811	110	104319	1323.76	15353.8	281.765	1.70551e+06	22632.2	0.0627813	0.000291935	0.14701	0.00157369		17.2677	0.325772	0.147265	0.000786857	0.413649
RA138 - 12		2023-03-15 22:21:22	38.4501	110	86419.5	1115.45	15155.6	525.095	1.46534e+06	16242.4	0.0607235	0.000730434	0.173563	0.00430318		16.7358	0.388654	0.175389	0.00215197	-0.262241
RA138 - 12		2023-03-24 21:54:59	38.005	110	76626.7	436.439	11667.2	279.42	1.23436e+06	10188	0.0595209	0.000503746	0.151786	0.00333024		15.6616	0.460117	0.15228	0.00166506	-0.334509		x
RA138 - 13		2022-11-26 10:28:55	37.494	110	53059.3	440.874	10254.7	187.405	932441	9193.76	0.0596562	0.00049405	0.194323	0.00285057		16.0972	0.281192	0.193524	0.00142529	0.690506
RA138 - 13		2022-11-27 15:34:03	37.516	110	51970.7	878.256	20477.8	685.032	641374	5662.27	0.0869081	0.00151949	0.393824	0.00706726		11.1658	0.209443	0.393824	0.00353335	-0.793434
RA138 - 13		2022-11-28 21:21:22	37.014	110	49206	529.704	9194.71	189.257	937005	14774.9	0.0540138	0.000438187	0.187283	0.00360074		16.3923	0.290951	0.187283	0.0018006	-0.514975
RA138 - 13		2022-12-22 19:38:17	34.3001	110	45796.7	421.301	7299.99	149.906	891603	8353.67	0.0527986	0.000353068	0.159568	0.00257215		17.2858	0.31444	0.15944	0.00128661	0.631662
RA138 - 13		2023-01-04 00:44:42	37.516	110	67918.8	580.013	17452.5	453.173	1.02518e+06	7180.59	0.0677322	0.000632754	0.25571	0.00502289		14.4341	0.282891	0.257425	0.00112936	0.817415
RA138 - 13		2023-01-04 16:36:46	37.506	110	68525.7	875.661	23304.7	603.523	971245	8803.24	0.072761	0.000847057	0.337492	0.00504484		12.5666	0.235974	0.340544	0.00107534	0.857688
RA138 - 13		2023-01-30 18:00:28	36.504	110	153684	1256.55	49082.8	990.736	1.71368e+06	15850.2	0.0937445	0.000975046	0.00488844	0.00488844		12.6725	0.335906	0.319431	0.00244432	-0.556019
RA138 - 13		2023-02-02 17:29:28	36.505	110	107166	1178.59	26943.6	794.723	1.44743e+06	11262.5	0.0836615	0.000939388	0.252424	0.00544612		14.7641	0.307383	0.25148	0.00272337	0.850256
RA138 - 13		2023-02-03 19:16:17	36.509	110	90273	1108.71	15919.4	444.762	1.44263e+06	17744.7	0.05892	0.0004443	0.176	0.00319867		16.5086	0.475379	0.176379	0.00159933	-0.632992
RA138 - 13		2023-02-05 23:58:49	22.4582	110	94238.1	906.946	12777.8	253.994	1.64855e+06	15681.4	0.0572702	0.000360677	0.135199	0.00211372		17.5657	0.286614	0.136394	0.00149726	0.187709
RA138 - 13		2023-02-10 22:44:46	36.504	110	126513	451.389	18393.4	189.754	2.15561e+06	10809.1	0.060575	0.00027903	0.145341	0.00143563		18.2715	0.437762	0.145329	0.000717874	0.150457		x
RA138 - 13		2023-03-02 15:32:16	38.076	110	96696.7	664.73	13536.6	133.452	1.6372e+06	13639.4	0.0613502	0.000270828	0.140192	0.00133105		17.6294	0.332347	0.140071	0.000665512	0.0166575
RA138 - 13		2023-03-15 23:21:17	38.3204	110	143256	1297.71	31773.9	620.81	2.29286e+06	18067.9	0.063958	0.000417415	0.219386	0.00281778		15.8446	0.359145	0.221818	0.00140877	-0.0882256
RA138 - 13		2023-03-24 22:59:12	38.006	110	77980.1	639.137	17329.7	258.398	1.21248e+06	11842.7	0.0615187	0.000390704	0.223315	0.00261878		15.0041	0.438799	0.222261	0.00130886	-0.235874
RA138 - 14		2022-11-26 10:30:20	37.458	110	49028.9	402.414	6835.9	84.3709	934475	11095.8	0.054373	0.000356929	0.139422	0.00142568		17.6613	0.305275	0.139611	0.000712841	0.436963
RA138 - 14		2022-11-27 15:35:26	37.498	110	49911.2	296.197	9754.86	92.6208	890383	7415.76	0.0607361	0.000285392	0.196772	0.00191434		15.9768	0.267795	0.196772	0.000957092	0.219495
RA138 - 14		2022-11-28 21:24:12	36.946	110	41584	316.282	7235.53	134.244	802344	6398.91	0.0531136	0.000339302	0.173804	0.00259619		16.6706	0.29294	0.173804	0.00129828	0.0119037
RA138 - 14		2022-12-22 19:39:36	37.506	110	47440.6	445.445	10039.2	295.431	874045	8184.52	0.0563159	0.000522593	0.210016	0.00471296		16.2042	0.299338	0.211669	0.00235743	0.803877
RA138 - 14		2023-01-04 01:11:37	37.506	110	62482	480.088	11548.4	146.685	1.08642e+06	10658.6	0.0587565	0.000364785	0.185092	0.00180732		16.5941	0.320027	0.185161	0.000411987	0.42457
RA138 - 14		2023-01-04 17:24:31	37.504	110	58485.4	490.063	9626.08	214.779	1.1291e+06	12528.2	0.0534925	0.000468022	0.16508	0.00342911		17.0709	0.313783	0.16481	0.000713383	0.60037
RA138 - 14		2023-01-30 18:01:51	36.504	110	135179	1294.29	30622.3	618.704	1.78979e+06	18305.3	0.0792634	0.00045868	0.00293165	0.00293165		14.9786	0.391721	0.226571	0.00146589	-0.398356
RA138 - 14		2023-02-02 17:30:50	36.506	110	122535	1701.13	33752.3	1269.79	1.57353e+06	14783.5	0.0874384	0.00116977	0.273481	0.00625554		14.1323	0.298685	0.275518	0.00312815	0.964702
RA138 - 14		2023-02-03 19:17:49	36.521	110	90985.7	694.519	11607.2	256.713	1.55713e+06	14068.2	0.0550489	0.000283195	0.127156	0.00213364		17.6762	0.506664	0.127594	0.00106682	-0.0769084
RA138 - 14		2023-02-06 00:00:07	25.5826	110	110708	942.933	21526.4	410.945	1.78028e+06	18771.5	0.0624132	0.000478996	0.193778	0.00318006		16.1151	0.26531	0.195594	0.00203232	-0.168138
RA138 - 14		2023-02-10 22:46:14	36.504	110	125379	1122.36	27067.2	481.309	1.90404e+06	19352.3	0.0679585	0.000418251	0.215629	0.00268848		16.2873	0.391637	0.215796	0.00134439	-0.284511
RA138 - 14		2023-03-02 15:33:47	38.003	110	88338.2	760.751	13994.8	265.395	1.43964e+06	11085.9	0.063749	0.000320981	0.158591	0.0020536		16.9645	0.320472	0.158514	0.00102678	0.524727
RA138 - 14		2023-03-15 23:22:45	36.505	110	142525	874.605	27684.3	514.344	2.43593e+06	17188	0.0599748	0.000412712	0.193159	0.00280369		16.8958	0.383416	0.194259	0.00140172	-0.301292
RA138 - 14		2023-03-24 23:00:46	38.003	110	83952.7	885.916	18541.1	553.663	1.31658e+06	11024.6	0.0609571	0.000641721	0.219553	0.00463863		15.1369	0.447221	0.220881	0.00231837	-0.59849
RA138 - 15		2022-11-26 11:15:57	37.485	110	50057.2	390.129	9242.63	123.151	896835	9526.36	0.0585641	0.000393698	0.184652	0.00184384		16.3974	0.283677	0.184886	0.00092192	0.636269
RA138 - 15		2022-11-27 16:19:39	37.516	110	65479.6	985.974	26683.3	580.109	785096	14600.4	0.0885176	0.00129098	0.411599	0.00689805		10.9503	0.198501	0.411599	0.00344876	-0.773406
RA138 - 15		2022-11-28 21:30:24	37.054	110	45433	307.239	10192.9	148.997	815041	6129.51	0.0570936	0.000438246	0.225272	0.00307732		15.5102	0.27454	0.225272	0.00153894	-0.103302
RA138 - 15		2022-12-22 20:22:49	37.506	110	46819.5	557.677	9439.91	360.105	868722	10351.2	0.0554481	0.000599009	0.199853	0.00531165		16.3889	0.306123	0.201674	0.00265502	0.9562
RA138 - 15		2023-01-04 01:12:59	37.506	110	67383.4	1062.34	16050	322.367	1.09551e+06	21959.6	0.0626245	0.000606479	0.233421	0.0047577		15.5669	0.305739	0.238619	0.00108289	0.809177
RA138 - 15		2023-01-04 17:25:53	37.512	110	58526.1	361.293	10919	189.112	1.08655e+06	8657.43	0.0555582	0.000455085	0.186706	0.00317639		16.4356	0.301046	0.186818	0.000659814	0.428284
RA138 - 15		2023-01-30 18:40:17	36.505	110	149851	821.681	39585	424.805	1.88103e+06	14960.3	0.0836215	0.000486171	0.0023107	0.0023107		13.9735	0.365457	0.26421	0.00115518	-0.294763
RA138 - 15		2023-02-02 18:09:04	36.503	110	102194	797.527	23782.9	464.513	1.40586e+06	10100.1	0.0820126	0.000672623	0.233291	0.003486		15.2317	0.311693	0.232778	0.00174331	0.764376
RA138 - 15		2023-02-03 20:07:20	36.515	110	93140.5	790.12	14449.8	226.652	1.47743e+06	16520.5	0.0595532	0.000299138	0.155051	0.00178313		16.5754	0.475022	0.155167	0.000891563	-0.0833249
RA138 - 15		2023-02-06 00:46:51	21.7886	110	111750	986.567	24349.3	448.06	1.74265e+06	18783.6	0.0642434	0.000592454	0.217281	0.0030289		15.5563	0.259179	0.219181	0.00222353	-0.491598
RA138 - 15		2023-02-10 23:46:36	23.4211	110	126054	644.515	20753.8	268.692	1.97409e+06	10031.5	0.0649276	0.000340463	0.164642	0.00178411		17.087	0.409944	0.164576	0.000892009	0.0144742
RA138 - 15		2023-03-02 16:24:03	6.39643	110	171226	14481.4	74973.6	9916.5	1.73794e+06	55782.2	0.107616	0.00729537	0.421673	0.0266125		10.0188	0.38795	0.438113	0.0133052	0.579709
RA138 - 15		2023-03-16 00:22:37	36.505	110	138968	809.611	29712	429.03	2.26887e+06	16612.2	0.0626745	0.000473153	0.213724	0.00299965		16.133	0.366961	0.213824	0.00149971	-0.143816
RA138 - 15		2023-03-25 00:05:22	38.004	110	75159.6	667.884	12290.2	290.17	1.33372e+06	11975.3	0.0539608	0.000393272	0.163246	0.00288961		16.8094	0.492513	0.163543	0.00144473	-0.285568
RA138 - 16		2022-11-26 11:58:30	37.441	110	48980.6	417.979	8175.98	179.552	888134	8338.19	0.0584594	0.000412266	0.167131	0.00289449		16.4268	0.284724	0.167144	0.00144725	0.570126
RA138 - 16		2022-11-27 16:21:02	37.45	110	55571	479.104	8528.65	93.8439	1.05195e+06	12244.2	0.0572427	0.000261997	0.154089	0.00154969		16.9324	0.283668	0.154089	0.000774783	0.24008
RA138 - 16		2022-11-28 21:31:49	37.013	110	43959.9	320.064	10240.3	171.752	777023	6566.37	0.0581021	0.000404082	0.232797	0.00355561		15.2415	0.268645	0.232797	0.00177813	-0.0686032
RA138 - 16		2022-12-22 20:24:11	37.504	110	46918.5	397.699	9841.54	240.304	857641	7780.95	0.0564557	0.000538571	0.210662	0.00437579		16.0941	0.297837	0.209811	0.00218717	0.902565
RA138 - 16		2023-01-04 01:39:58	37.504	110	63054.4	459.336	13515.3	173.607	1.07348e+06	9873.34	0.0600121	0.000395316	0.214602	0.00236556		16.1942	0.312823	0.21473	0.000523423	0.354079
RA138 - 16		2023-01-04 18:15:06	37.511	110	57542.4	511.715	11085.2	182.459	1.06635e+06	12380.7	0.0556707	0.00044157	0.192598	0.00250482		16.379	0.299542	0.192903	0.0004925	0.507455
RA138 - 16		2023-01-30 18:41:39	36.504	110	99026.4	1604.13	32174.5	945.577	1.10043e+06	18504	0.0944727	0.00103983	0.00528213	0.00528213		12.3619	0.328429	0.324965	0.00264066	-0.47841
RA138 - 16		2023-02-02 18:10:25	37.7893	110	94305.3	471.645	19449.9	322.129	1.38618e+06	9444.54	0.0767595	0.000433481	0.204736	0.00275027		16.2793	0.329594	0.206294	0.00137538	0.654547
RA138 - 16		2023-02-03 20:08:52	36.506	110	92505	485.569	14783	332.138	1.46121e+06	12931.4	0.0598259	0.000344637	0.159628	0.003315		16.5079	0.473658	0.159835	0.0016575	-0.098405
RA138 - 16		2023-02-06 00:48:22	17.8041	110	86384.2	572.976	12267.6	189.238	1.51139e+06	12992.8	0.0573968	0.000567083	0.141669	0.00216635		17.4086	0.291677	0.142853	0.00119229	0.40262
RA138 - 16		2023-02-10 23:47:52	36.503	110	136399	1894.89	27960	1424.64	2.02577e+06	17115.2	0.0689396	0.000714363	0.204646	0.0068569		16.0934	0.392745	0.204905	0.00342826	-0.816022
RA138 - 16		2023-03-02 16:24:13	27.8796	110	106682	933.475	19349.2	353.556	1.6341e+06	14931.7	0.0669213	0.000375875	0.181151	0.00230387		16.1109	0.305007	0.181476	0.00115184	0.658513
RA138 - 16		2023-03-16 00:24:05	37.32	110	133717	1959.9	34810.6	1323.68	2.02567e+06	19812.7	0.0681922	0.000959189	0.262119	0.00715902		14.827	0.348543	0.260353	0.00357924	-0.744429
RA138 - 16		2023-03-25 00:06:56	38.006	110	77049.2	868.446	11487.8	264.669	1.40528e+06	18134.8	0.0526506	0.000380303	0.149063	0.00250323		17.2201	0.504479	0.149116	0.00125158	-0.0547153
RA138 - 17		2022-11-26 12:58:12	37.449	110	53838.9	600.95	13239.4	347.226	887473	11672.6	0.0656042	0.000715592	0.244309	0.00402494		14.6378	0.260923	0.246234	0.00201247	0.931961
RA138 - 17		2022-11-27 17:04:04	37.498	110	53129.8	553.635	11138	456.797	936228	8333.21	0.0610213	0.000808796	0.209916	0.00673756		15.859	0.283404	0.209916	0.0033687	-0.860684
RA138 - 17		2022-11-28 21:33:14	36.986	110	42732.7	293.34	8145.7	137.923	813508	7147.97	0.0538849	0.000393215	0.190188	0.00296985		16.4349	0.290249	0.190188	0.0014852	-0.014155
RA138 - 17		2022-12-22 21:05:11	37.524	110	45680.2	329.47	6425.62	82.299	928771	9189.53	0.0508734	0.000259454	0.14117	0.00168702		17.7856	0.321236	0.1407	0.000843132	0.324967
RA138 - 17		2023-01-04 01:41:20	37.511	110	67929.7	539.58	13083	212.92	1.19061e+06	11396.7	0.0582564	0.000385615	0.192405	0.00243652		16.6795	0.322242	0.192944	0.000538678	0.533348
RA138 - 17		2023-01-04 18:16:28	37.511	110	57340.7	549.941	13615.1	292.421	990552	9689.84	0.0592777	0.000559957	0.236826	0.00385395		15.3817	0.284057	0.237762	0.000757012	0.736848
RA138 - 17		2023-01-30 19:21:26	36.504	110	127252	1357.09	27707.4	754.236	1.80952e+06	14481.8	0.0737029	0.000594165	0.00417668	0.00417668		15.6335	0.411196	0.217774	0.00208784	-0.529134
RA138 - 17		2023-02-02 18:48:30	36.508	110	118509	1039.02	27466.9	567.721	1.65075e+06	15103.5	0.0809861	0.000702012	0.230602	0.00336383		15.5151	0.318239	0.231828	0.00168209	0.722498
RA138 - 17		2023-02-03 20:58:35	36.514	110	99349.4	1042.67	22327.1	728.881	1.39026e+06	10688.1	0.0671941	0.00068181	0.22459	0.00522462		14.9337	0.433007	0.224772	0.00261231	-0.810675
RA138 - 17		2023-02-06 01:26:16	27.9677	110	110798	1495.08	24738.7	892.403	1.71084e+06	13410.1	0.0647972	0.000913401	0.221148	0.00511421		15.349	0.268496	0.2246	0.00429968	-0.736711
RA138 - 17		2023-02-11 00:48:28	18.4078	110	128266	1412.93	19220	248.854	2.13136e+06	20015.2	0.0637155	0.000397129	0.149832	0.00213725		17.4506	0.419697	0.149784	0.00106854	0.278077
RA138 - 17		2023-03-02 16:25:33	38.02	110	104877	949.077	23820	413.93	1.54296e+06	19531.9	0.0708126	0.000518714	0.227864	0.00305078		15.2244	0.290437	0.227255	0.00152527	0.779177
RA138 - 17		2023-03-16 01:24:06	24.0294	110	116732	1783.65	36642.8	945.94	1.58536e+06	23937.9	0.0749075	0.000685756	0.312359	0.00445056		13.4805	0.308606	0.313933	0.00222533	-0.00445334
RA138 - 17		2023-03-25 01:09:28	38.004	110	76130.2	686.956	13260.9	328.341	1.3371e+06	13950.8	0.0544816	0.000414624	0.176436	0.00401975		16.3833	0.480366	0.17421	0.00201056	-0.483161
RA138 - 18		2022-11-26 12:59:36	37.465	110	43696.8	468.898	7860.45	220.947	794306	10751.3	0.0585987	0.000570753	0.180051	0.0043795		16.3877	0.289332	0.180125	0.00218975	0.848538
RA138 - 18		2022-11-27 17:05:27	37.433	110	57096.9	576.353	10966.2	340.663	1.04291e+06	9353.03	0.0598278	0.0005267	0.190861	0.00466264		16.1744	0.277712	0.190861	0.00233127	-0.824173
RA138 - 18		2022-11-28 21:34:37	36.977	110	43202	390.051	8120.52	174.04	819390	8839.86	0.0541141	0.000429845	0.187816	0.00342977		16.366	0.290169	0.187816	0.0017152	-0.247707
RA138 - 18		2022-12-22 21:06:33	37.506	110	48198.7	318.901	6856.56	97.1201	975541	9141.2	0.0511524	0.0002521	0.142281	0.00178799		17.6861	0.319228	0.142292	0.000893603	0.204386
RA138 - 18		2023-01-04 02:08:28	37.504	110	68929.8	505.005	17036	273.05	1.10661e+06	9658.06	0.0637533	0.000444996	0.248003	0.00311728		15.1879	0.293907	0.247596	0.000684627	0.613673
RA138 - 18		2023-01-04 19:04:31	37.513	110	72751.2	847.984	21027.4	651.555	1.1541e+06	21089.8	0.0650886	0.00108528	0.288441	0.00836717		13.9879	0.275612	0.289419	0.00168671	0.909714
RA138 - 18		2023-01-30 19:22:49	36.503	110	132552	701.154	30796.6	365.938	1.85388e+06	12059.5	0.0750687	0.000497731	0.00233997	0.00233997		15.3429	0.402018	0.232376	0.00116971	-0.237955
RA138 - 18		2023-02-02 18:49:53	36.504	110	97617.5	610.977	18408.7	358.521	1.47998e+06	12335	0.0744487	0.000565296	0.187966	0.00310058		16.8783	0.344396	0.188626	0.00155044	0.679805
RA138 - 18		2023-02-03 21:00:07	36.506	110	114286	1101.67	27379.6	685.737	1.53716e+06	13584.3	0.070231	0.000623012	0.238287	0.0043221		14.2947	0.41298	0.239614	0.00216105	-0.459666
RA138 - 18		2023-02-06 01:27:46	24.5164	110	97675.9	698.792	15677.4	269.805	1.6612e+06	14130.5	0.0589038	0.000389092	0.161158	0.00216226		16.8817	0.275966	0.161455	0.00149571	0.0596546
RA138 - 18		2023-02-11 00:49:59	35.6306	110	134951	976.179	28777.8	496.251	1.97728e+06	16425.1	0.0703806	0.000373608	0.212946	0.00268654		15.7988	0.379093	0.213161	0.00134316	-0.361013
RA138 - 18		2023-03-02 17:16:04	38.01	110	103341	702.641	20623	286.508	1.60368e+06	13993.1	0.0670677	0.000300074	0.199896	0.00194008		16.0297	0.302247	0.199677	0.00097024	0.53269
RA138 - 18		2023-03-16 01:25:31	39.6281	110	128042	1780.27	40733	1165.06	1.72265e+06	28055.3	0.0765156	0.0009795	0.317966	0.00540296		13.1969	0.307829	0.318149	0.00270156	-0.287909
RA138 - 18		2023-03-25 01:11:02	38.006	110	40200.2	621.519	7858.4	242.877	672297	10780.7	0.0574308	0.000545157	0.195823	0.00418232		15.5372	0.457684	0.195508	0.00209187	-0.199919
RA138 - 19		2022-11-26 15:58:29	37.447	110	41363.7	396.61	6427.05	88.1216	827659	11636.8	0.0550063	0.000390029	0.154959	0.00192047		17.458	0.302666	0.155585	0.000960236	0.493925
RA138 - 19		2022-11-27 17:50:35	18.062	110	62527.5	5540.88	51547.6	4632.83	21102.7	626.171	3.15063	0.301205	0.820384	0.00737046		0.306494	0.0155085	0.820384	0.00368522	-0.237837		x
RA138 - 19		2022-11-28 21:36:03	37.008	110	43841.9	363.187	7339.61	211.88	850503	6468.87	0.0528018	0.000445359	0.16618	0.00404482		16.7734	0.298344	0.16618	0.00202278	-0.261608
RA138 - 19		2022-12-22 21:48:56	37.503	110	48256.7	586.638	12430.2	415.164	822627	7183.53	0.0605447	0.000687945	0.254865	0.00597102		14.8769	0.279114	0.257649	0.0029868	0.876541
RA138 - 19		2023-01-04 02:09:50	37.503	110	64686.6	450.339	12811.1	175.972	1.12279e+06	9558.02	0.0588934	0.000361066	0.198148	0.00229241		16.4381	0.316916	0.198406	0.000502953	0.546503
RA138 - 19		2023-01-04 19:05:53	37.506	110	65155.5	1368.21	20093.2	831.604	1.01391e+06	16182.2	0.0664873	0.0010168	0.305805	0.00732771		13.693	0.265941	0.308802	0.00148176	0.919693
RA138 - 19		2023-01-30 20:00:54	36.506	110	152384	1642.01	42851.5	858.701	1.95697e+06	19135.8	0.0817829	0.000615815	0.00332716	0.00332716		13.952	0.366418	0.281257	0.00166363	-0.570691
RA138 - 19		2023-02-02 19:28:00	36.504	110	111462	811.868	26462.5	661.083	1.55611e+06	11531.2	0.0809103	0.000752603	0.237833	0.00482634		15.4649	0.31828	0.23747	0.00241318	0.836492
RA138 - 19		2023-02-03 21:51:11	36.504	110	114787	1900.93	11885	350.68	2.01266e+06	40232.4	0.0538771	0.000280802	0.103582	0.00233743		18.8936	0.541617	0.103558	0.00116872	-0.266826
RA138 - 19		2023-02-06 02:08:23	32.1911	110	104898	798.543	14731.2	190.693	1.8416e+06	16466.2	0.0570318	0.000345526	0.140167	0.00164249		17.3497	0.282696	0.141266	0.00105447	0.338795
RA138 - 19		2023-02-11 01:48:53	36.506	110	136170	1066.38	29143.3	649.22	2.04405e+06	16388.4	0.0686645	0.000517446	0.214021	0.00347898		16.2196	0.391601	0.213936	0.00173969	-0.520052
RA138 - 19		2023-03-02 17:17:34	38.009	110	102523	1427.49	18544.9	512.414	1.60792e+06	24384	0.0663702	0.000438901	0.180027	0.00329201		16.1971	0.307937	0.18099	0.00164636	0.236564
RA138 - 19		2023-03-16 02:23:55	40.3538	110	130328	1109.25	26591.5	386.27	2.11483e+06	17100.3	0.0636009	0.0005321	0.204427	0.00255753		15.8667	0.362036	0.204053	0.00127867	0.195614
RA138 - 19		2023-03-25 02:15:29	38.017	110	77055.9	1272.37	17049.5	769.909	1.3016e+06	23215.1	0.0569619	0.000581744	0.217111	0.00702488		15.5631	0.459382	0.221291	0.00351273	-0.301544
RA138 - 2		2022-11-25 14:55:36	37.504	110	52531.1	569.027	7920.44	186.582	940560	10361.8	0.0568551	0.000441963	0.151391	0.00276457		16.8903	0.294058	0.150976	0.00138229	0.740275
RA138 - 2		2022-11-27 11:07:00	37.465	110	58390.2	667.315	13163.6	260.656	988573	12641.8	0.0640016	0.000405662	0.223874	0.00270971		15.0532	0.254336	0.223874	0.001355	-0.349222
RA138 - 2		2022-11-28 21:01:08	36.957	110	39288.2	283.355	5776.57	93.0022	794593	7373.52	0.050857	0.000291377	0.147293	0.00215053		17.4124	0.304984	0.147293	0.00107517	-0.0653515
RA138 - 2		2022-12-22 15:17:48	37.507	110	43538.3	325.288	7277.63	203.137	826034	8352.36	0.0544116	0.00045628	0.168155	0.00435616		17.0021	0.312255	0.167196	0.00217832	0.808526
RA138 - 2		2023-01-03 22:43:07	37.506	110	61782.8	478.489	12627.6	171.4	1.01077e+06	10842.5	0.0625677	0.000433782	0.204451	0.00242198		15.7463	0.304647	0.204757	0.00054239	0.535667
RA138 - 2		2023-01-04 12:26:18	37.505	110	54502.4	559.01	10669.7	216.702	984259	11082.2	0.0570924	0.000442089	0.19536	0.00277138		16.1051	0.294207	0.196028	0.000620529	0.567431
RA138 - 2		2023-01-30 14:16:04	36.504	110	141800	1331.06	34497.1	1088.84	1.89886e+06	15258.6	0.0784168	0.000834215	0.00593003	0.00593003		15.5626	0.412879	0.243323	0.00296447	-0.834932		x
RA138 - 2		2023-02-02 14:01:31	36.506	111	115157	1614.4	28875.9	639.167	1.56865e+06	28255.1	0.0826591	0.000886784	0.248599	0.00484612		14.093	0.292481	0.250815	0.00242306	0.876964		x
RA138 - 2		2023-02-03 14:09:39	36.507	110	103810	638.321	19026.8	312.229	1.63303e+06	13115.7	0.0599382	0.000342228	0.183468	0.00270469		16.4055	0.470679	0.183318	0.00135235	-0.394904
RA138 - 2		2023-02-05 19:09:11	21.2125	110	96518.9	594.344	13913.4	191.912	1.61439e+06	11169.1	0.0598092	0.000394508	0.143654	0.00158329		17.2072	0.281271	0.145006	0.00108874	0.127457
RA138 - 2		2023-02-10 16:33:40	36.506	110	130513	1361.48	28988	983.974	2.05518e+06	16079.4	0.0655304	0.000715994	0.221755	0.00461607		16.0054	0.391583	0.222019	0.00230814	-0.835347
RA138 - 2		2023-03-02 10:27:52	38.01	110	94020.3	535.415	14573.5	127.472	1.55342e+06	12051	0.0628441	0.000283313	0.155213	0.00149675		16.909	0.31886	0.155093	0.000748355	0.0827008
RA138 - 2		2023-03-15 17:16:45	36.504	110	140946	982.04	32505.2	539.095	2.25047e+06	16825.4	0.0639912	0.000396331	0.229875	0.00283657		15.6171	0.353623	0.230642	0.00141818	-0.495989
RA138 - 2		2023-03-24 16:29:52	38.006	110	70254.2	599.286	12707.2	293.964	1.24508e+06	12558.2	0.0538985	0.000331923	0.180364	0.00329912		17.096	0.499801	0.180899	0.00164944	-0.547199
RA138 - 20		2022-11-26 16:42:37	37.486	110	49052.5	447.533	10917.5	203.988	859921	10338.8	0.0637053	0.00054565	0.225345	0.00360553		15.0741	0.263834	0.222863	0.00180277	0.73108
RA138 - 20		2022-11-27 17:51:48	37.5	110	42921.8	462.541	11844.2	280.367	658660	6138.16	0.0691663	0.000898105	0.27878	0.00497191		13.9604	0.248784	0.27878	0.00248597	-0.461394
RA138 - 20		2022-11-28 21:38:52	36.965	110	46186.5	317.569	10735.2	169.514	810582	6258.88	0.0583093	0.000355219	0.232485	0.0029816		15.1906	0.266532	0.232485	0.00149106	-0.169364
RA138 - 20		2022-12-22 21:50:18	37.518	110	47211.9	380.331	8587.82	153.323	914834	9587.72	0.0533902	0.000348377	0.181823	0.00276948		16.8681	0.306593	0.181945	0.00138536	0.482819
RA138 - 20		2023-01-04 02:36:58	37.506	110	70080.1	633.993	17680.4	512.626	1.11695e+06	9802.4	0.0642488	0.000639533	0.251899	0.00556228		15.009	0.295288	0.252743	0.00118391	0.843462
RA138 - 20		2023-01-04 19:55:24	37.583	110	58799.6	769.618	14431.7	521.748	1.00974e+06	10499.4	0.0600781	0.000720778	0.24234	0.00601683		15.1296	0.284947	0.245769	0.00141845	0.85763
RA138 - 20		2023-01-30 20:02:18	36.505	110	143020	929.205	32243	579.857	2.02295e+06	16549.7	0.0744136	0.000427919	0.00309968	0.00309968		15.3294	0.400865	0.225484	0.00154992	-0.482975
RA138 - 20		2023-02-02 19:29:23	36.506	110	104063	770.086	19336.9	344.663	1.58526e+06	13916.5	0.0741243	0.000424932	0.185425	0.00244347		16.8745	0.341747	0.185864	0.00122174	0.513471
RA138 - 20		2023-02-03 21:52:42	36.504	110	97262	716.23	19975.9	349.647	1.46693e+06	15274.6	0.0626074	0.000404896	0.20518	0.00294812		16.2644	0.467286	0.205418	0.00147406	-0.424022
RA138 - 20		2023-02-06 02:09:39	32.754	110	124682	1590.15	24825.6	575.627	2.01163e+06	29315	0.0622261	0.000440637	0.198287	0.00291893		15.8988	0.260689	0.200291	0.00263452	-0.13838
RA138 - 20		2023-02-11 01:50:21	36.503	110	130056	959.999	19789.3	569.973	2.12495e+06	11412.7	0.06297	0.000435158	0.153236	0.00386943		17.6868	0.426197	0.152098	0.00193496	-0.620475
RA138 - 20		2023-03-02 18:06:05	38.042	110	91612.2	850.134	12909.4	224.037	1.55563e+06	17624.4	0.0613463	0.000276154	0.140778	0.00177938		17.4925	0.329857	0.140994	0.000889853	0.482973
RA138 - 20		2023-03-16 02:25:23	40.8014	110	140873	1238.27	33871.1	732.409	2.16112e+06	28632.6	0.0673574	0.000680817	0.242511	0.0043632		14.9816	0.344471	0.240458	0.00218142	-0.393962
RA138 - 20		2023-03-25 02:17:03	38.012	110	73623.4	553.501	14640.1	276.118	1.23142e+06	8113.79	0.0571351	0.000415775	0.19911	0.00304311		15.5162	0.454612	0.198877	0.00152167	-0.386465
RA138 - 21		2022-11-26 17:28:48	37.45	110	48423.4	406.645	11471.5	304.148	836237	8615.82	0.0636654	0.000731055	0.238342	0.00519877		15.0835	0.270227	0.237214	0.00259938	0.895753
RA138 - 21		2022-11-27 18:34:54	13.144	110	121952	5367.5	99574.6	4706.02	117911	4153.63	1.14949	0.0620757	0.818745	0.0058248		0.838011	0.0265598	0.818745	0.0029129	-0.373959
RA138 - 21		2022-11-28 21:40:16	36.982	110	46691.7	512.985	9815.88	277.425	864629	7996.71	0.0553776	0.000479831	0.20858	0.00416173		15.9956	0.284951	0.20858	0.00208121	-0.2636
RA138 - 21		2022-12-22 22:31:06	37.505	110	47212.7	400.278	8358.06	150.232	920917	9128.33	0.0529632	0.000345859	0.176929	0.00239237		16.9332	0.307785	0.177074	0.00119627	0.607597
RA138 - 21		2023-01-04 02:38:21	37.506	110	66438.7	481.968	13421.4	240.038	1.16084e+06	9647.59	0.0584304	0.000386168	0.201446	0.00281911		16.5002	0.318764	0.202376	0.000600018	0.397977
RA138 - 21		2023-01-04 19:56:46	37.507	110	52386.9	451.936	7542.71	132.15	1.0534e+06	12647.4	0.051356	0.000396447	0.144011	0.00225969		17.6983	0.323268	0.144174	0.000536539	0.341632
RA138 - 21		2023-01-30 20:40:41	36.51	110	146363	1185.01	35486.4	812.816	2.02295e+06	21966.6	0.0760771	0.000646831	0.00410764	0.00410764		14.9004	0.392431	0.242496	0.00205428	-0.772821
RA138 - 21		2023-02-02 20:07:28	36.504	110	119130	913.911	29862.1	825.411	1.65379e+06	17280	0.0817067	0.00100698	0.252566	0.00608953		15.0578	0.315822	0.250729	0.00304479	0.908176
RA138 - 21		2023-02-03 22:42:23	36.507	110	80560.9	834.011	12277.8	286.08	1.3078e+06	22507	0.0580905	0.000511293	0.153412	0.00390937		17.6581	0.510056	0.152431	0.00194291	-0.646474
RA138 - 21		2023-02-06 02:48:49	35.113	110	115349	914.663	18425	338.143	1.97483e+06	17069.9	0.058465	0.000309678	0.15973	0.00228815		16.8322	0.273146	0.160679	0.0015967	0.29113
RA138 - 21		2023-02-11 02:51:02	36.504	110	140529	991.804	34079.5	798.032	2.05217e+06	15175.6	0.0705116	0.000633904	0.24357	0.00444225		15.7966	0.38335	0.242411	0.0022211	-0.783186		x
RA138 - 21		2023-03-02 18:07:39	33.1407	110	116721	1355.3	29781.9	608.96	1.60521e+06	22119.9	0.075055	0.000531732	0.254555	0.00391323		14.297	0.27242	0.2553	0.00195694	0.695305
RA138 - 21		2023-03-16 03:25:18	38.8419	110	141300	1586.75	34812.4	873.351	2.19352e+06	21251.9	0.0659112	0.000590031	0.244805	0.00367865		15.2997	0.349947	0.246394	0.00183929	-0.252181
RA138 - 21		2023-03-25 03:19:32	38.014	110	64951.7	682.721	11597.8	347.867	1.12394e+06	9285.52	0.0552996	0.000493236	0.176949	0.00398637		16.1735	0.475703	0.178584	0.00199312	-0.493848
RA138 - 22		2022-11-26 17:30:13	37.499	110	46961.5	373.94	9477.57	148.075	867155	8558.37	0.059737	0.000340303	0.200095	0.00238603		16.0754	0.276624	0.202083	0.00119302	0.361537
RA138 - 22		2022-11-27 18:35:10	14.067	110	45536.9	1804.6	34168	1478.21	125472	3147.46	0.38089	0.0137376	0.750673	0.00859037		2.529	0.0619804	0.750673	0.00429592	-0.222968
RA138 - 22		2022-11-28 21:41:41	36.966	110	45202.2	603.722	10589	394.337	801729	10594.3	0.0582526	0.000766653	0.232038	0.00580903		15.207	0.281179	0.232038	0.00290496	-0.737718
RA138 - 22		2022-12-22 22:32:28	37.528	110	45899.4	345.744	7613.13	119.937	905902	9137.62	0.0524209	0.000325049	0.166169	0.00223532		17.1061	0.310432	0.165907	0.0011177	0.368756
RA138 - 22		2023-01-04 03:05:36	37.504	110	69648.9	504.336	18656.3	297.446	1.08406e+06	9583.57	0.0655793	0.000445801	0.267563	0.00311072		14.6378	0.283024	0.268345	0.000675147	0.677295
RA138 - 22		2023-01-04 20:44:52	37.506	110	54149.3	454.993	11591.2	266.987	985648	11269.9	0.0567272	0.000540402	0.21377	0.00429117		15.9963	0.295571	0.214347	0.00116668	0.680362
RA138 - 22		2023-01-30 20:42:03	36.504	110	148253	1593.58	35737.2	1002.43	2.02622e+06	17049.5	0.0768662	0.000754942	0.00448419	0.00448419		14.7448	0.39002	0.241097	0.0022426	-0.72467
RA138 - 22		2023-02-02 20:08:50	36.504	110	102930	1073.54	22616.3	633.75	1.48544e+06	12631.7	0.07773	0.000606887	0.218137	0.00403286		15.8153	0.323025	0.219779	0.00201645	0.798109
RA138 - 22		2023-02-03 22:43:53	36.504	110	79330.1	878.827	8499.89	163.03	1.38609e+06	19480.9	0.0540963	0.000279564	0.106942	0.00181523		18.9637	0.543588	0.107165	0.000907613	-0.0736555
RA138 - 22		2023-02-06 03:32:51	24.6139	110	90342.6	840.829	14817.9	358.4	1.5623e+06	17099.1	0.0579049	0.000436409	0.163566	0.00293529		16.8752	0.277555	0.164991	0.00212535	0.291829
RA138 - 22		2023-02-11 02:52:30	36.504	110	139505	1200.62	30929.4	571.267	2.11874e+06	20173.6	0.0678718	0.000455311	0.222812	0.00308006		16.4105	0.395208	0.221619	0.00154001	-0.559468
RA138 - 22		2023-03-02 18:57:41	38.01	110	94294.2	592.259	16515.9	276.179	1.5161e+06	12941.1	0.064655	0.000321496	0.174703	0.00248974		16.585	0.313234	0.175253	0.00124466	0.00862416
RA138 - 22		2023-03-16 03:26:46	39.4967	110	119161	1308.1	25039.4	510.958	1.94975e+06	27046	0.0625414	0.000509683	0.209769	0.00312269		16.1236	0.367582	0.21015	0.00156134	0.222356
RA138 - 22		2023-03-25 03:21:06	38.006	110	73354.7	494.461	12457.5	245.352	1.29412e+06	12444.4	0.0543082	0.000417023	0.16996	0.00304663		16.4758	0.48315	0.169849	0.00152326	-0.163193
RA138 - 23		2022-11-26 18:11:33	37.485	110	43729	421.251	7389.39	236.655	848641	6619.01	0.0567779	0.000439938	0.167824	0.00394875		16.9132	0.29441	0.169206	0.00197437	0.808256
RA138 - 23		2022-11-27 18:36:16	37.474	110	58328.9	336.689	5023.69	66.6033	1.22509e+06	9146.23	0.0514421	0.000213717	0.0867912	0.00102245		18.7242	0.31317	0.0867912	0.000511311	0.116482
RA138 - 23		2022-11-28 21:44:40	36.974	110	46244.5	353.627	6694.36	153.071	934675	8597.92	0.0507763	0.000317094	0.144871	0.00280068		17.4484	0.306382	0.144871	0.00140052	-0.0704929
RA138 - 23		2022-12-22 23:14:55	37.505	110	49109	455.062	10036.8	243.967	913009	9374.38	0.0556623	0.000411335	0.203398	0.00385135		16.0432	0.292924	0.204429	0.00192513	0.644859
RA138 - 23		2023-01-04 03:07:11	23.8811	110	72164.2	581.882	21280.4	495.823	1.03308e+06	8503.9	0.0702876	0.000940884	0.293988	0.00544196		13.6536	0.275483	0.295421	0.00118567	0.828703
RA138 - 23		2023-01-04 20:46:14	37.516	110	50505.6	509.88	7705.39	220.521	1.01149e+06	10608	0.0515494	0.000522985	0.154606	0.00407306		17.6022	0.32669	0.15277	0.00110832	0.632796
RA138 - 23		2023-01-30 21:21:58	36.504	110	181248	19462.1	40434.3	1441.02	2.83426e+06	421805	0.0738621	0.00110176	0.00918943	0.00918943		15.2742	0.413021	0.223127	0.00459488	-0.693634
RA138 - 23		2023-02-02 20:46:55	36.504	110	112470	1748.3	30241.2	955.776	1.47939e+06	24500.3	0.0858773	0.000866113	0.265469	0.00490254		13.9217	0.287801	0.268949	0.0024512	0.800824
RA138 - 23		2023-02-03 23:33:49	36.504	110	105874	1714.04	31353.3	1069.39	1.35219e+06	18431.5	0.0732525	0.00105221	0.293238	0.00666528		13.9818	0.411589	0.296188	0.00333264	-0.832503
RA138 - 23		2023-02-06 03:34:18	16.8009	110	87363	570.894	12331.2	178.155	1.5652e+06	12731	0.0557916	0.00041668	0.141223	0.00206447		17.5099	0.287857	0.141985	0.00111907	0.0868498
RA138 - 23		2023-02-11 03:53:11	36.506	110	128191	835.151	26138	560.55	2.037e+06	13484.4	0.0649915	0.000434165	0.20526	0.00368853		17.08	0.411297	0.203818	0.00184424	-0.652199		x
RA138 - 23		2023-03-02 18:59:11	38.006	110	93489.5	851.251	14093.2	268.273	1.55329e+06	13424	0.0625015	0.00034494	0.150025	0.00185153		17.1563	0.324675	0.150833	0.000925608	0.580858
RA138 - 23		2023-03-16 04:26:54	36.6529	110	134004	1220.35	32578.2	420.43	2.07076e+06	22929.9	0.0661171	0.000595533	0.242909	0.00246411		15.2219	0.348251	0.243135	0.00123233	0.0638828
RA138 - 23		2023-03-25 04:25:27	38.004	110	67864.4	511.286	12260.3	307.776	1.17111e+06	12365.5	0.0553253	0.000477787	0.180208	0.00373813		16.5839	0.487422	0.180683	0.00186909	0.270695
RA138 - 24		2022-11-26 18:12:57	37.458	110	43127.4	285.042	5120.08	56.4068	896549	8941.16	0.0532712	0.000361448	0.118392	0.00146061		18.0266	0.311973	0.118877	0.000730304	0.508361
RA138 - 24		2022-11-27 19:19:19	37.482	110	60054.7	493.189	5309.92	102.741	1.25937e+06	12954.4	0.0518502	0.000264371	0.0877317	0.00135304		18.5267	0.311075	0.0877317	0.000676513	-0.0722548
RA138 - 24		2022-11-28 21:46:04	36.993	110	42188.9	312.602	7116.76	158.231	828392	8582.6	0.0523126	0.000416855	0.168688	0.00342611		16.9371	0.300344	0.168688	0.00171323	-0.188023
RA138 - 24		2022-12-22 23:16:17	37.505	110	50290.7	412.788	12606.5	241.404	874936	6856.53	0.0593619	0.000395867	0.249724	0.00362531		15.0414	0.273587	0.250736	0.00181214	0.577236
RA138 - 24		2023-01-04 03:34:25	37.508	110	65723.4	468.519	12192.2	267.204	1.17269e+06	9506.67	0.0573312	0.000430685	0.186347	0.0036587		16.6597	0.323219	0.185843	0.000823101	0.57605
RA138 - 24		2023-01-04 21:38:13	37.504	110	52012.4	464.777	9672.91	191.813	980800	10852.5	0.0546982	0.000469222	0.185698	0.00294879		16.558	0.304022	0.186223	0.000729511	0.51039
RA138 - 24		2023-01-30 21:23:20	36.504	110	176048	4337.85	61415.2	2295.16	2.00902e+06	30385.8	0.0892043	0.00173481	0.00847771	0.00847771		12.6453	0.350918	0.348917	0.00423898	-0.8838
RA138 - 24		2023-02-02 20:48:17	36.505	110	102322	655.921	20684.3	541.559	1.4886e+06	11964.4	0.0778077	0.000687357	0.202409	0.00447154		15.3479	0.315081	0.202199	0.00223569	0.813088
RA138 - 24		2023-02-03 23:35:19	36.504	110	106771	1602.48	28254.5	1159.61	1.46443e+06	15125.6	0.0687332	0.000992066	0.262916	0.00701109		14.898	0.438688	0.264673	0.00350554	-0.886928
RA138 - 24		2023-02-06 04:10:41	32.2071	110	113276	1006.3	21802.8	656.123	1.89985e+06	18842.8	0.0603457	0.000599717	0.19309	0.00461731		16.0755	0.269479	0.193616	0.00301968	-0.37379
RA138 - 24		2023-02-11 03:54:39	36.511	110	139482	1270.77	30567.7	840.085	2.15137e+06	15342.5	0.0668946	0.000550173	0.219152	0.00420126		16.5917	0.401516	0.219064	0.00210063	-0.730959		x
RA138 - 24		2023-03-02 19:49:17	38.011	110	98169.6	2257.21	27470.5	323.491	1.32215e+06	36089.4	0.0774532	0.000624907	0.284226	0.00487203		13.8433	0.265124	0.279987	0.00243571	0.7231
RA138 - 24		2023-03-16 04:28:20	37.1877	110	132710	1057.13	33846.1	586.797	2.04616e+06	17469.1	0.0663551	0.000452469	0.254455	0.00307054		15.1662	0.344094	0.25506	0.00153562	-0.151997
RA138 - 24		2023-03-25 04:27:01	38.018	110	71821.8	793.683	13764.1	384.517	1.21642e+06	12140	0.0567293	0.000549145	0.190491	0.00377427		16.1858	0.477036	0.191668	0.00188717	-0.256945
RA138 - 25		2022-11-26 18:55:42	37.49	110	44525.3	414.107	8459.41	308.268	834839	5308.54	0.0589533	0.000707145	0.189147	0.00516532		16.2892	0.29319	0.190243	0.00258266	0.888343
RA138 - 25		2022-11-27 19:20:42	37.477	110	44761	238.079	7459	105.167	846043	6853.74	0.0572828	0.000290183	0.166975	0.00227656		16.7681	0.281506	0.166975	0.00113825	-0.0661337
RA138 - 25		2022-11-28 21:50:39	37.02	110	44839.9	294.803	7990.11	165.469	866860	6227.52	0.0528634	0.00033787	0.177932	0.00324379		16.7647	0.294598	0.177932	0.00162196	-0.124926
RA138 - 25		2022-12-22 23:57:41	37.504	110	41834.6	296.615	6272.73	95.8334	844548	8156	0.0512527	0.000285717	0.149864	0.00190445		17.3564	0.314093	0.149979	0.000952203	0.252122
RA138 - 25		2023-01-04 03:35:47	37.511	110	67969.9	507.547	16213.2	290.364	1.11951e+06	9441.95	0.0620144	0.000442999	0.238261	0.00328803		15.3978	0.298199	0.238965	0.000739704	0.619603
RA138 - 25		2023-01-04 21:39:35	37.525	110	55474.9	647.663	12101.7	330.521	1.00554e+06	12239	0.0568521	0.00048792	0.216308	0.00405386		15.9299	0.292496	0.21844	0.00100046	0.577455
RA138 - 25		2023-01-30 22:01:18	36.52	110	142649	1060.65	29623.6	553.431	2.06348e+06	19188.7	0.0727574	0.000440523	0.00312952	0.00312952		15.4276	0.403697	0.207704	0.00156461	-0.416232
RA138 - 25		2023-02-02 21:26:27	36.506	110	99105.3	672.475	20770.1	438.176	1.44089e+06	10495.9	0.0774907	0.000573561	0.209155	0.00374358		14.9194	0.304164	0.209628	0.00187143	0.31729		x
RA138 - 25		2023-02-04 00:24:46	36.504	110	104878	1938.85	18867.5	1425.59	1.59159e+06	17774.5	0.0622211	0.00106334	0.174293	0.0100477		16.2592	0.484512	0.179931	0.00502386	-0.847346
RA138 - 25		2023-02-06 04:12:12	23.5974	110	105898	783.038	16986.4	317.01	1.85255e+06	10185.4	0.057211	0.000411811	0.160279	0.00248749		16.951	0.278157	0.161353	0.00160997	-0.0888526
RA138 - 25		2023-02-11 04:55:20	36.514	110	133728	778.167	29226.2	501.101	2.04139e+06	14107.9	0.0674889	0.000388978	0.218222	0.00289976		16.2852	0.391192	0.218462	0.00144988	-0.492452
RA138 - 25		2023-03-02 19:50:50	33.7496	110	96419.6	641.676	15789.4	301.864	1.6074e+06	11391.5	0.062031	0.000397075	0.164478	0.00351199		17.2849	0.328306	0.163851	0.00165749	0.268415
RA138 - 25		2023-03-16 05:28:26	39.4831	110	133166	1274.93	32969.4	696.402	2.04533e+06	17818.5	0.0668165	0.000592949	0.246014	0.00369032		14.9879	0.342702	0.247603	0.00184516	-0.0792248
RA138 - 25		2023-03-25 05:31:34	38.006	110	67958.2	628.031	11080.9	187.949	1.19375e+06	14822.2	0.0547675	0.000431089	0.163302	0.00249558		17.3391	0.508686	0.163076	0.0012478	-0.212391
RA138 - 26		2022-11-26 19:40:10	37.477	110	39594.1	240.133	5248.72	79.3192	813821	8023.89	0.0538077	0.000411861	0.132991	0.00203334		17.8469	0.310476	0.132739	0.00101667	0.607468
RA138 - 26		2022-11-27 20:02:07	28.044	110	48810	305.184	7181.65	96.651	960687	8179.28	0.0556819	0.000297964	0.147331	0.00180392		17.2012	0.289157	0.147331	0.000901955	0.17921
RA138 - 26		2022-11-28 21:52:04	37.011	110	41149.9	393.768	6675.95	225.765	806379	6531.14	0.05232	0.000569948	0.160802	0.00397737		16.9402	0.306917	0.160802	0.00198873	-0.553712
RA138 - 26		2022-12-22 23:59:03	37.504	110	44683.6	415.366	8145.84	187.613	874521	8845.15	0.0529248	0.000357995	0.182364	0.00298293		16.8061	0.305833	0.182346	0.00149147	0.642699
RA138 - 26		2023-01-04 04:03:30	37.504	110	64357.4	453.556	15119	221.82	1.07396e+06	9621.41	0.0612693	0.000521474	0.235358	0.00308762		15.5031	0.302373	0.235347	0.000679071	0.601494
RA138 - 26		2023-01-04 22:27:29	37.504	110	59576.3	836.095	15680.9	465.184	989303	14728.8	0.062038	0.00114238	0.265488	0.00548358		14.572	0.292713	0.26356	0.0012003	0.850472
RA138 - 26		2023-01-30 22:02:42	36.503	110	147019	1495.87	35329	906.738	1.97805e+06	22997.1	0.077488	0.000820809	0.00584148	0.00584148		14.4824	0.384156	0.240344	0.00292046	-0.718007
RA138 - 26		2023-02-02 21:27:49	36.504	110	108564	692.689	18530.1	340.471	1.67669e+06	11803.6	0.0729656	0.000450575	0.169906	0.00259715		15.8276	0.321059	0.170725	0.00129832	0.481636		x
RA138 - 26		2023-02-04 00:26:16	36.514	110	108346	1539.92	27157.8	729.258	1.4733e+06	24382.8	0.0695267	0.000632455	0.249384	0.00456563		14.543	0.420409	0.250703	0.00228282	-0.582246
RA138 - 26		2023-02-06 04:46:00	26.6771	110	91926.8	614.213	11928.8	170.044	1.68211e+06	14341.8	0.054697	0.000342899	0.129751	0.0016		17.5997	0.28712	0.130533	0.00102145	0.0839426
RA138 - 26		2023-02-11 04:56:48	36.51	110	135476	960.921	29264.9	540.219	2.07713e+06	13905.4	0.067296	0.000487392	0.21592	0.0030877		16.3262	0.393808	0.21593	0.00154385	-0.364842
RA138 - 26		2023-03-02 20:39:11	38.006	110	99989.2	674.165	15427.7	173.089	1.67052e+06	15086.7	0.0622056	0.000254379	0.154368	0.00133801		17.2216	0.324344	0.154382	0.000668984	0.0363338
RA138 - 26		2023-03-16 05:30:00	34.1408	110	102598	1677.67	26070.9	673.187	1.51212e+06	28949.2	0.0694684	0.000890792	0.25573	0.00396913		14.4131	0.336242	0.254129	0.00198454	-0.224808
RA138 - 26		2023-03-25 05:33:08	38.004	110	71144.5	597.676	14027.1	240.208	1.19286e+06	11395.9	0.0570697	0.0003307	0.19743	0.00250177		16.6529	0.486538	0.19719	0.00125089	-0.0857626
RA138 - 27		2022-11-26 19:41:36	37.497	110	42428.3	312.424	7369.41	133.098	816084	6671.2	0.057158	0.000344587	0.175058	0.00250442		16.8008	0.28958	0.173921	0.00125221	0.360913
RA138 - 27		2022-11-27 20:03:32	37.487	110	47045.2	371.243	8048.75	170.295	874163	7355.14	0.0579852	0.000343905	0.170809	0.00282585		16.5163	0.278446	0.170809	0.00141292	-0.283931
RA138 - 27		2022-11-28 21:53:29	36.958	110	41075.7	438.272	6920.65	150.615	807877	8465.15	0.0521373	0.00038861	0.166332	0.00268813		17.0011	0.300525	0.166332	0.00134407	-0.132715
RA138 - 27		2022-12-23 00:42:04	37.503	110	44244.1	370.042	9089.73	150.869	838889	8250.24	0.0546616	0.000345678	0.204775	0.00259028		16.217	0.29447	0.205496	0.00129556	0.537327
RA138 - 27		2023-01-04 04:04:52	37.504	110	63233.6	536.475	12288.6	216.664	1.12849e+06	11745.2	0.0571462	0.00038205	0.194134	0.00232007		16.6171	0.321133	0.194688	0.000510188	0.557095
RA138 - 27		2023-01-04 22:28:51	37.504	110	62326.4	1560.15	15344.7	344.269	1.07596e+06	36102.9	0.0597481	0.000897288	0.245325	0.00742661		15.1297	0.29303	0.24653	0.00161861	0.833633
RA138 - 27		2023-01-30 22:40:48	36.503	110	159021	1814.59	50026.1	1114.74	1.84997e+06	19399	0.0902666	0.000852507	0.00401961	0.00401961		12.3227	0.32553	0.314643	0.00200967	-0.582609
RA138 - 27		2023-02-02 22:12:09	36.518	110	113975	1263.6	30220.8	681.579	1.609e+06	16488.4	0.0792605	0.000662409	0.264566	0.00444618		14.26	0.292035	0.265217	0.00222281	0.754117
RA138 - 27		2023-02-04 01:17:31	36.504	110	93889.4	1062.8	14631.5	399.249	1.62064e+06	20425	0.0552062	0.000507423	0.156717	0.00280354		17.8914	0.517338	0.155865	0.00140177	-0.116858
RA138 - 27		2023-02-06 05:21:27	25.4791	110	94183.1	640.887	14194.8	169.264	1.69329e+06	17858.6	0.0557419	0.000430428	0.150952	0.00202317		17.1279	0.282078	0.151608	0.00103461	-0.218477
RA138 - 27		2023-02-11 05:57:31	36.505	110	136791	1146.89	29173.1	512.726	2.01398e+06	18071	0.0700796	0.000413773	0.212991	0.00241401		15.3587	0.369067	0.213182	0.00120698	-0.282392
RA138 - 27		2023-03-02 20:40:42	17.8327	110	136110	4090.09	41484.9	3303.77	1.81561e+06	13246.3	0.0800542	0.00235074	0.295031	0.0141603		13.3811	0.318372	0.304965	0.00708002	0.984691
RA138 - 27		2023-03-16 06:30:12	38.8302	110	124223	1004.45	27837.8	581.822	2.00306e+06	21529.7	0.0637639	0.000554115	0.224945	0.0037211		15.5443	0.355149	0.224115	0.0018602	-0.521353
RA138 - 27		2023-03-25 06:35:48	38.004	110	64465.6	442.65	9248.97	116.352	1.14035e+06	9763.32	0.0542056	0.000253863	0.143358	0.00169978		17.9691	0.524098	0.14349	0.000849796	0.154743
RA138 - 28		2022-11-26 20:23:24	37.499	110	50140	712.336	9718.06	257.989	922546	15475	0.0603582	0.000443549	0.193493	0.0033418		15.91	0.276256	0.194075	0.0016709	0.697902
RA138 - 28		2022-11-27 20:46:35	37.324	110	48673.6	284.86	7079.22	83.7059	951644	8306.24	0.0552548	0.000266387	0.145535	0.00168717		17.2778	0.28975	0.145535	0.000843522	0.0389345
RA138 - 28		2022-11-28 21:54:53	36.957	110	43764	321.193	7855.7	139.992	846005	7771.12	0.0529385	0.000340622	0.178453	0.00256422		16.7452	0.294322	0.178453	0.00128208	0.0271692
RA138 - 28		2022-12-23 00:43:26	37.517	110	50128.9	720.084	13388.2	494.994	850586	8054	0.0607526	0.000943314	0.265819	0.00618553		14.5897	0.284402	0.267142	0.00309363	0.947679
RA138 - 28		2023-01-04 04:26:58	37.506	110	77281.2	360.004	22479.8	211.108	1.17717e+06	10725.9	0.0671421	0.000499985	0.291322	0.00261303		14.0794	0.273067	0.291409	0.000572524	0.725107
RA138 - 28		2023-01-04 23:18:39	37.51	110	56242.8	501.627	11632.1	243.586	1.04302e+06	11619.2	0.0557419	0.000449401	0.206386	0.003452		16.1854	0.296231	0.207097	0.000682486	0.591193
RA138 - 28		2023-01-30 22:42:11	36.508	110	149578	1136.19	37054.9	665.682	1.95968e+06	19156.5	0.0803393	0.000597391	0.00343484	0.00343484		13.8393	0.363367	0.247774	0.00171732	-0.576268		x
RA138 - 28		2023-02-02 22:13:31	36.506	110	99525.4	657.37	18029.2	494.491	1.64322e+06	14104.5	0.0684342	0.000528797	0.181661	0.00423728		16.5158	0.337206	0.181196	0.00211839	0.816967
RA138 - 28		2023-02-04 01:19:02	36.505	110	92460.9	1093	14766.7	585.376	1.57545e+06	17572.1	0.055343	0.000577857	0.159254	0.0058218		17.8323	0.517517	0.159736	0.0029109	-0.802833
RA138 - 28		2023-02-06 05:22:37	33.9063	110	105416	794.79	20890.4	340.359	1.76697e+06	15747.3	0.0600532	0.000446303	0.197342	0.00252028		15.894	0.261226	0.199344	0.00177883	-0.163253
RA138 - 28		2023-02-11 05:59:08	27.3381	110	127129	791.368	21971.9	409.463	1.95362e+06	16526.1	0.0663226	0.000432535	0.17269	0.00299935		16.2166	0.39033	0.172763	0.00149964	-0.427289
RA138 - 28		2023-03-02 20:41:03	14.4682	110	106005	1416.86	20775.4	563.922	1.61038e+06	16193.2	0.0668091	0.000567725	0.195497	0.00351247		16.0338	0.30782	0.196096	0.0017562	0.644067
RA138 - 28		2023-03-16 06:31:42	38.4954	110	118203	1123.1	26000.5	498.351	1.92476e+06	22296.2	0.0628794	0.00044753	0.217831	0.00248545		15.7576	0.357874	0.219986	0.00124249	-0.0349477
RA138 - 28		2023-03-25 06:37:22	38.01	110	71881.7	606.412	10864.8	188.424	1.27056e+06	12809.8	0.0541997	0.000268823	0.150503	0.00185629		17.9769	0.52453	0.151169	0.000928044	-0.0142812
RA138 - 29		2022-11-26 20:24:48	37.498	110	49190.6	431.817	12558	232.3	826807	10495.2	0.0659906	0.000673129	0.256892	0.00385808		14.5521	0.257867	0.25563	0.00192904	0.85734
RA138 - 29		2022-11-27 20:48:17	18.978	110	46334	386.902	7568.87	168.826	866202	6979.95	0.0567793	0.00044246	0.163489	0.00267334		16.8117	0.286593	0.163489	0.00133657	-0.0953995
RA138 - 29		2022-11-28 21:56:18	36.991	110	50081.2	1295.67	11749.5	772.943	864715	12278.1	0.0575123	0.00106977	0.238532	0.0108785		15.415	0.302494	0.238532	0.00543897	-0.841941
RA138 - 29		2022-12-23 01:24:33	37.504	110	49380	316.747	11430.4	185.084	894697	8112.05	0.0571847	0.000353991	0.231369	0.00318366		15.4589	0.280526	0.231537	0.00159136	0.588202
RA138 - 29		2023-01-04 04:28:20	37.504	110	70973.1	811.963	18882.9	640.046	1.12112e+06	10284.8	0.0644847	0.000823697	0.264089	0.00641554		14.6553	0.294236	0.266537	0.001406	0.884088
RA138 - 29		2023-01-04 23:20:02	37.506	110	54197	416.831	9840	156.208	1.04157e+06	10510	0.0537257	0.000435177	0.182021	0.00248734		16.7918	0.307401	0.181804	0.000491212	0.522851
RA138 - 29		2023-01-30 23:07:59	36.506	110	115049	1142.91	23843.3	698.482	1.89197e+06	14426.6	0.0637203	0.000520474	0.00435438	0.00435438		17.2676	0.454319	0.207281	0.00217724	-0.605192		x
RA138 - 29		2023-02-02 22:46:09	36.504	110	100023	724.097	18678.9	337.296	1.59988e+06	12295.4	0.0705307	0.00045415	0.186198	0.00260175		16.3372	0.331731	0.186792	0.00130106	0.587183
RA138 - 29		2023-02-04 02:08:37	36.504	110	84681	639.533	17272.5	261.64	1.388e+06	17251.7	0.0576356	0.00030016	0.204331	0.0030044		16.6108	0.476172	0.204007	0.0015022	-0.145171
RA138 - 29		2023-02-06 06:01:45	25.7536	110	120711	878.265	22535.1	545.784	2.02462e+06	19539.7	0.0595619	0.000480263	0.187506	0.00433444		15.8851	0.26226	0.187793	0.00236052	-0.29953
RA138 - 29		2023-02-11 06:45:50	36.504	110	131170	945.188	23570.4	408.339	2.2089e+06	20117.3	0.0612717	0.000354482	0.179516	0.00263833		17.0843	0.410411	0.179622	0.00131915	-0.446881
RA138 - 29		2023-03-02 21:30:39	38.014	110	109363	1480.09	28874.9	1030.15	1.52813e+06	13623.8	0.0744171	0.000866831	0.263574	0.00658473		14.3343	0.281055	0.264178	0.00329298	0.971146
RA138 - 29		2023-03-16 07:18:21	35.1287	110	113403	593.526	21412.9	303.732	1.98322e+06	9405.76	0.0587076	0.000328245	0.188647	0.00236088		16.6546	0.376464	0.188838	0.0011804	-0.0858983
RA138 - 29		2023-03-25 07:42:07	38.008	110	66465.9	714.952	10937.5	240.879	1.17535e+06	14296.1	0.0541406	0.0003753	0.164154	0.00272467		17.811	0.521475	0.16458	0.00136235	-0.10825
RA138 - 3		2022-11-25 15:41:15	37.499	110	52322.8	390.35	9162.77	119.436	900847	9359.8	0.0583981	0.000452628	0.176246	0.00233035		16.444	0.286246	0.175352	0.00116518	0.72979
RA138 - 3		2022-11-27 11:50:13	37.441	110	49936.5	409.217	6535.97	121.731	988794	10293.3	0.0550468	0.00028936	0.132192	0.00183743		17.5558	0.294987	0.132192	0.000918604	-0.144139
RA138 - 3		2022-11-28 21:02:32	37.002	110	42588.9	400.28	8753.15	258.771	792508	5897.64	0.0550423	0.000520714	0.20429	0.00458991		16.0879	0.288218	0.20429	0.00229478	-0.560729
RA138 - 3		2022-12-22 16:00:46	37.513	110	37776.5	343.142	5780.6	87.9417	744556	9832.41	0.0526758	0.000346789	0.153153	0.00233379		17.5587	0.319237	0.153059	0.00116654	0.498204
RA138 - 3		2023-01-03 22:50:06	37.505	110	60516.2	448.58	12702.3	207.915	994259	10909.6	0.0621774	0.000470734	0.209819	0.0029744		15.8413	0.30743	0.210279	0.000675187	0.487869
RA138 - 3		2023-01-04 13:15:36	37.504	110	74692.4	1223.8	28509.6	867.192	965087	11047	0.0798748	0.00123791	0.377946	0.00621647		11.5007	0.223829	0.382206	0.00145036	0.922886
RA138 - 3		2023-01-30 14:39:05	36.506	110	141518	1452.89	34082.6	565.942	1.93725e+06	27254.9	0.0764963	0.000662474	0.00415492	0.00415492		16.1845	0.426457	0.240878	0.00207738	-0.747754		x
RA138 - 3		2023-02-02 14:11:55	36.504	112	108338	1027.98	24295.9	538.974	1.55635e+06	12757.8	0.0785301	0.000642906	0.223167	0.00323377		14.9823	0.306568	0.224314	0.00161688	0.793522
RA138 - 3		2023-02-03 15:00:21	36.505	110	102847	1316.2	23587.4	544.973	1.52249e+06	18741.8	0.0637224	0.000437024	0.228003	0.00297173		15.4714	0.444852	0.229385	0.00148586	-0.35146
RA138 - 3		2023-02-05 19:43:04	31.5917	110	89294.7	745.562	12052	137.353	1.50286e+06	16489.6	0.0596365	0.000340152	0.135159	0.00133763		17.4111	0.283138	0.135768	0.000953411	0.00791189
RA138 - 3		2023-02-10 17:38:25	36.507	110	133877	840.771	29247.2	731.553	1.86885e+06	17179.8	0.0739086	0.000700189	0.218312	0.00440975		14.4764	0.351976	0.218376	0.0022047	-0.803612		x
RA138 - 3		2023-03-02 11:17:59	38.042	110	94549.9	634.723	13155.9	165.793	1.60352e+06	12316.1	0.0611868	0.000281173	0.139696	0.00129317		17.5098	0.330281	0.139223	0.000646765	0.297809
RA138 - 3		2023-03-15 18:16:27	38.2043	110	131052	662.901	26809.5	468.898	2.17194e+06	18848	0.0617606	0.000483869	0.204159	0.00278283		16.4035	0.37351	0.204589	0.00139159	-0.411895
RA138 - 3		2023-03-24 17:34:00	38.02	110	80150.3	951.131	16969	548.149	1.27762e+06	10749.6	0.059886	0.000482097	0.210527	0.00448656		14.8598	0.436132	0.211743	0.0022437	-0.818123
RA138 - 30		2022-11-26 21:03:29	37.481	110	33405.6	423.129	12012.4	297.124	465085	2160.87	0.0785915	0.00104795	0.358034	0.00535116		12.2189	0.222788	0.360069	0.00267558	0.858464
RA138 - 30		2022-11-27 21:29:27	31.534	110	61040.3	412.216	17848.1	261.675	953539	9260.17	0.0698813	0.00043168	0.291971	0.00333967		13.6165	0.22986	0.291971	0.00166945	-0.127378
RA138 - 30		2022-11-28 21:57:42	37.023	110	44965.6	269.66	8384.84	111.031	858096	7130.93	0.053784	0.000392052	0.186359	0.00240448		16.4852	0.291123	0.186359	0.00120214	0.0652323
RA138 - 30		2022-12-23 01:25:55	37.504	110	46159.3	401.643	8944.06	207.48	882223	7589.59	0.0540499	0.000435566	0.193163	0.0034379		16.3542	0.299757	0.193813	0.00171844	0.736592
RA138 - 30		2023-01-04 04:47:03	37.504	110	65974	329.24	15159.5	193.777	1.07192e+06	7334.29	0.0628456	0.000439388	0.229655	0.00265911		14.9767	0.289836	0.230195	0.000591986	0.568586
RA138 - 30		2023-01-05 00:08:10	37.504	110	55337.7	446.122	12146.6	267.761	995324	9677.03	0.0572687	0.000534625	0.22002	0.00431092		15.7219	0.290117	0.219794	0.000886653	0.646855
RA138 - 30		2023-01-30 23:09:20	36.52	110	109069	538.427	22637.7	322.683	1.78459e+06	12855.9	0.064203	0.00039083	0.00277751	0.00277751		17.1261	0.448175	0.20759	0.0013888	-0.45981		x
RA138 - 30		2023-02-02 22:47:31	36.504	110	102396	667.558	20325.2	291.377	1.60372e+06	17441.2	0.0721857	0.000509459	0.198466	0.00271592		15.9914	0.325529	0.198545	0.00135817	0.693915
RA138 - 30		2023-02-04 02:10:07	36.506	110	91602.2	686.798	19480.9	439.888	1.45519e+06	8196.76	0.0593874	0.000401924	0.211736	0.00360023		16.1049	0.462982	0.212706	0.00180012	-0.314239
RA138 - 30		2023-02-06 06:03:08	23.4926	110	118780	1260.68	21922	754.886	2.01808e+06	15953.7	0.0587955	0.000471399	0.183661	0.00452451		16.0876	0.265513	0.185652	0.00332517	-0.339785
RA138 - 30		2023-02-11 07:04:40	37.3459	110	134491	1311.79	30619.7	595.764	2.00331e+06	19511.4	0.0693939	0.000448065	0.227544	0.00274047		14.8667	0.357772	0.22758	0.00137024	-0.225588
RA138 - 30		2023-03-02 21:32:07	38.005	110	103397	619.648	15815.1	247.992	1.71296e+06	12378.2	0.0626871	0.000265602	0.153457	0.00202069		17.013	0.320553	0.153043	0.00101054	0.415118
RA138 - 30		2023-03-16 07:19:49	40.8326	110	117165	1020.96	20617	302.891	2.07146e+06	23833.3	0.0580479	0.000324454	0.175298	0.00169613		16.8352	0.380544	0.17598	0.000848047	0.0476573
RA138 - 30		2023-03-25 07:43:42	38.026	110	71868.5	770.286	15298.4	450.227	1.18634e+06	11927.7	0.0580607	0.000611473	0.213492	0.00459007		16.5916	0.490205	0.212895	0.00229506	-0.849065
RA138 - 31		2022-11-26 21:04:53	37.458	110	46581.6	604.205	11846.5	318.617	789999	9482.11	0.0665883	0.00052497	0.253133	0.00401857		14.4214	0.251254	0.254655	0.00200929	0.835813
RA138 - 31		2022-11-27 21:30:49	37.497	110	114014	4280.97	74050	2963.29	669957	25271	0.184353	0.00661908	0.6681	0.00728342		5.16097	0.126176	0.6681	0.00364089	-0.886126		x
RA138 - 31		2022-11-28 21:59:05	36.99	110	45452.9	313.916	7264.09	154.483	897048	7477.03	0.0518286	0.000335844	0.159847	0.00284516		17.1088	0.300784	0.159847	0.00142245	-0.175388
RA138 - 31		2022-12-23 02:06:55	37.506	110	48366.2	460.008	10112.8	251.132	897696	9123.22	0.0557288	0.000355444	0.207668	0.00370631		15.8309	0.287534	0.20914	0.00185351	0.605566
RA138 - 31		2023-01-04 04:48:25	37.504	110	69879.5	612.641	16802.5	327.433	1.12773e+06	10562.1	0.0633027	0.000493438	0.241701	0.00366409		14.864	0.288794	0.240884	0.000816325	0.745084
RA138 - 31		2023-01-05 00:09:32	37.511	110	57789.2	525.976	15675.1	356.413	935333	8812.3	0.0636215	0.000804904	0.271975	0.00473124		14.1512	0.26803	0.271611	0.000975828	0.817298
RA138 - 31		2023-02-04 02:59:44	36.503	110	76417	679.764	8729.39	194.698	1.387e+06	15915.8	0.052152	0.000277201	0.113978	0.00199951		17.7754	0.509645	0.114254	0.000999755	-0.107667
RA138 - 31		2023-02-06 06:42:23	18.6318	110	132363	1202.47	18923	561.663	2.37739e+06	17891.1	0.0557132	0.000446572	0.141882	0.00325971		16.8645	0.278332	0.143809	0.00221882	-0.327957
RA138 - 31		2023-03-02 22:19:37	35.5964	110	104649	744.783	26307.1	509.43	1.53543e+06	13440.8	0.0708196	0.000606071	0.253383	0.00423318		14.8979	0.286114	0.251529	0.00211662	0.57065
RA138 - 32		2022-11-27 22:12:19	7.988	110	794642	23482.6	673162	20840.2	145331	8833.23	6.40855	0.425597	0.846258	0.00429139		0.147978	0.00549319	0.846258	0.0021461	-0.545766
RA138 - 32		2022-11-28 22:00:31	36.95	110	44381.5	275.595	9161.75	167.236	813856	5971.91	0.0558707	0.000395381	0.206307	0.0033369		15.8727	0.279963	0.206307	0.00166824	-0.121572
RA138 - 32		2022-12-23 02:08:17	37.507	110	48229.3	419.881	10213.5	209.91	887015	7620.41	0.0563068	0.00059523	0.213747	0.00375201		15.6676	0.29213	0.211822	0.00187639	0.575434
RA138 - 32		2023-01-05 00:58:57	37.504	110	55136	631.108	12460.3	296.141	1.00492e+06	11053.5	0.0567698	0.00056593	0.223988	0.00343763		15.8256	0.293338	0.226295	0.000763706	0.689767
RA138 - 32		2023-02-04 03:01:14	36.506	110	94628.7	743.532	13171.3	207.465	1.62789e+06	18610	0.0551708	0.000399908	0.139568	0.00170573		16.7884	0.483122	0.139214	0.000852866	0.106173
RA138 - 32		2023-02-06 06:43:45	18.1154	110	102927	836.592	16224.1	410.795	1.81492e+06	14222.7	0.0567375	0.000365254	0.156651	0.00316908		16.5573	0.270386	0.158561	0.00209586	0.0415915
RA138 - 32		2023-03-02 22:21:05	36.4481	110	89007.7	570.631	13041.9	157.612	1.55025e+06	15310.5	0.0597919	0.000264025	0.146575	0.00165165		17.6371	0.332493	0.146609	0.00082583	0.43643
RA138 - 33		2022-11-27 22:12:32	26.612	110	54445.6	2273.2	37283.4	1928.74	239022	8558	0.240868	0.0140707	0.686308	0.010147		3.93704	0.132261	0.686308	0.0050745	-0.762094
RA138 - 33		2022-11-28 22:01:55	36.951	110	44368.3	312.231	6345.78	136.778	892330	9382.27	0.0510637	0.000424457	0.142891	0.00280101		17.3688	0.308683	0.142891	0.00140031	-0.196181
RA138 - 33		2022-12-23 02:50:41	37.504	110	42433	308.014	6594.78	103.341	846405	9239.85	0.0517425	0.000353986	0.155944	0.00243595		17.0306	0.310041	0.155455	0.00121774	0.51525
RA138 - 33		2023-01-05 01:00:19	37.504	110	54782.7	375.99	11482.5	250.877	1.01995e+06	11507.3	0.0554259	0.000578334	0.209482	0.00421305		16.2083	0.301469	0.209882	0.000940782	0.0524819
RA138 - 33		2023-02-04 03:50:32	36.506	110	97787	1714.72	25373.5	1106.26	1.45151e+06	18778.4	0.0634156	0.000808831	0.254317	0.00727611		14.3182	0.418831	0.259523	0.00363806	-0.818139
RA138 - 33		2023-02-06 07:22:29	15.8905	110	95263.7	1068	16158.4	608.5	1.7115e+06	22284.3	0.0556561	0.000735367	0.169081	0.00487793		16.8472	0.291784	0.170623	0.00333229	-0.374415
RA138 - 34		2022-11-27 22:13:44	17.072	110	46521.2	395.64	7328.98	184.069	910837	6786.27	0.0566566	0.0004802	0.16014	0.00310768		16.7362	0.286666	0.16014	0.00155418	-0.344996
RA138 - 34		2022-11-28 22:03:20	36.992	110	43727.5	235.959	8443.62	149.678	824350	7524.06	0.0544213	0.000474673	0.194293	0.003382		16.299	0.29047	0.194293	0.00169072	-0.395692
RA138 - 34		2022-12-23 02:52:02	37.506	110	43681.3	250.085	6623.95	80.4383	890067	7059.59	0.0507811	0.000289	0.151391	0.00170453		17.3527	0.314182	0.151681	0.000852097	0.163558
RA138 - 34		2023-01-05 01:48:17	37.504	110	73357.6	885.797	18202.1	437.969	1.28498e+06	15510.1	0.058958	0.000606194	0.248079	0.00465859		15.2047	0.28248	0.248462	0.00112139	0.782135
RA138 - 34		2023-02-04 03:52:03	36.505	110	100205	1923.57	26042	1416.03	1.46169e+06	12289.2	0.0644584	0.00137231	0.257767	0.00937673		14.0828	0.429076	0.259933	0.00468837	-0.822718
RA138 - 34		2023-02-06 07:42:09	37.506	110	96740.9	580.532	15917.9	207.828	1.72718e+06	15157.2	0.0561557	0.000359077	0.164544	0.00196768		16.7277	0.273097	0.165516	0.00118217	0.153971
RA138 - 35		2022-11-27 22:14:02	20.743	110	46680.6	542.084	8770.78	369.786	836155	5869.35	0.0593591	0.000742736	0.188752	0.00644162		15.9738	0.283313	0.188752	0.00322151	-0.706793
RA138 - 35		2022-11-28 22:04:45	36.961	110	44134.2	339.961	8208.71	167.37	841416	8107.88	0.0539417	0.000372561	0.185088	0.00308739		16.4458	0.289795	0.185088	0.00154343	-0.0629153
RA138 - 35		2022-12-23 03:33:14	37.62	110	43940.9	401.065	8105.28	147.318	845690	8903.6	0.0538228	0.000344967	0.183791	0.00245773		16.3705	0.297379	0.184505	0.001229	0.387168
RA138 - 35		2023-01-05 01:49:39	37.504	110	73081	918.629	25832.1	649.025	1.04135e+06	10832.7	0.0723201	0.000830882	0.351499	0.00531821		12.3947	0.232455	0.353947	0.00128018	0.842531
RA138 - 35		2023-02-04 04:43:23	36.517	110	105006	1861.79	24125.8	1187.78	1.61726e+06	17349	0.0614873	0.00093079	0.230665	0.00811441		14.9164	0.440544	0.229796	0.0040572	-0.852411
RA138 - 35		2023-02-06 07:43:40	28.7687	110	87007	574.456	12933.2	212.61	1.59057e+06	12883.1	0.0548078	0.000310837	0.148606	0.00206758		17.1432	0.278733	0.149526	0.00131666	0.110465
RA138 - 36		2022-11-28 07:40:11	39.43	110	40263	411.585	5605.5	112.487	819065	10971.3	0.0532475	0.000313193	0.140103	0.00264115		17.3283	0.29206	0.140103	0.00131973	-0.245776
RA138 - 36		2022-11-28 22:12:37	36.988	110	47275.9	567.452	9178.36	303.499	880712	8928.78	0.0550346	0.00063147	0.193652	0.00480391		16.1308	0.293693	0.193652	0.00240147	-0.570311
RA138 - 36		2022-12-23 03:34:36	37.504	110	45762.9	370.011	8226.58	143.631	887704	9078.26	0.0534855	0.000323824	0.180784	0.00271094		16.474	0.298757	0.17981	0.00135565	0.410673
RA138 - 36		2023-01-05 02:39:07	37.503	110	56445.3	483.646	14997.8	283.347	955510	9212.03	0.0609255	0.000590782	0.26613	0.0041256		14.6791	0.271557	0.266062	0.000923909	0.615704
RA138 - 36		2023-02-04 04:44:54	36.504	110	101058	1570.47	23508.4	918.862	1.54606e+06	18654.6	0.0615698	0.000659582	0.231793	0.00593867		14.9113	0.433116	0.232664	0.00296934	-0.807885
RA138 - 37		2022-11-28 07:41:37	37.48	110	44395	416.104	10838.6	208.59	777586	8269.8	0.0621514	0.000452518	0.242015	0.00333287		14.8463	0.252247	0.242015	0.00166543	-0.259387
RA138 - 37		2022-11-28 22:14:02	36.962	110	43864.7	250.115	6018.59	106.685	898400	6853.8	0.0500821	0.000315852	0.137118	0.002374		17.7284	0.311397	0.137118	0.00118677	0.0183379
RA138 - 37		2022-12-23 04:17:18	37.504	110	49285.8	339.193	11857.4	169.801	878169	8650.22	0.058105	0.000382124	0.240962	0.00318066		15.1805	0.27599	0.240646	0.00159039	0.58761
RA138 - 37		2023-01-05 02:40:29	37.506	110	51932.4	457.152	9826.97	181.559	991081	10930.8	0.0541242	0.000447434	0.187671	0.00267145		16.5226	0.30278	0.18948	0.000597526	0.445999
RA138 - 37		2023-02-04 05:17:48	36.516	110	107834	1663.43	23293.9	552.716	1.64008e+06	24339.8	0.0612074	0.00054672	0.218708	0.00426951		15.5224	0.448524	0.216055	0.00213475	-0.754472
RA138 - 38		2022-11-28 08:24:10	37.498	110	50136.3	401.822	12246.7	262.526	842522	7037.63	0.0645436	0.000517996	0.2424	0.00383049		14.3147	0.244413	0.2424	0.00191625	-0.526109
RA138 - 38		2022-11-28 22:15:25	36.975	110	46390.1	461.088	8782.34	370.355	873046	8828.18	0.0544819	0.000753897	0.188869	0.00633223		16.2991	0.303378	0.188869	0.00316554	-0.772577
RA138 - 38		2022-12-23 04:18:40	37.568	110	48242.3	415.138	9511.24	148.465	922514	9406.45	0.0541376	0.000373132	0.198534	0.00293023		16.2939	0.296708	0.197205	0.00146516	0.487886
RA138 - 38		2023-01-05 03:28:25	37.527	110	52343.3	409.265	10860.6	178.885	985609	10159.5	0.0549458	0.000588567	0.207456	0.00316113		16.2379	0.30266	0.207767	0.000697143	0.59278
RA138 - 38		2023-02-04 05:19:19	36.506	110	90612.7	607.865	13914.1	300.289	1.54249e+06	14966.6	0.0552853	0.000292216	0.153509	0.00295577		17.2233	0.493791	0.153583	0.00147788	-0.212228
RA138 - 39		2022-11-28 08:25:33	37.508	110	40120	200.845	6169.64	81.9289	774151	4771.78	0.0561542	0.000349225	0.154298	0.00217664		16.4542	0.277826	0.154298	0.00108891	0.0650814
RA138 - 39		2022-11-28 22:16:50	36.99	110	44088.4	289.652	7367.47	140.861	863365	7601.82	0.0523341	0.000365765	0.16694	0.00292989		16.9705	0.299178	0.16694	0.00146469	0.00525764
RA138 - 39		2022-12-23 04:45:57	37.506	110	49193.6	368.325	10623.5	142.808	910176	8705.44	0.0560062	0.000386641	0.21644	0.00248133		15.772	0.28722	0.216006	0.0012406	0.595213
RA138 - 39		2023-01-05 03:29:47	37.503	110	55944	724.551	15312.1	329.064	927579	13747.2	0.0621902	0.000659294	0.273977	0.00459412		14.3454	0.267159	0.274072	0.00101407	0.657918
RA138 - 4		2022-11-25 15:42:39	37.49	110	52221.4	384.94	9217.46	98.6044	905532	9161.59	0.0585002	0.000360474	0.176897	0.00162077		16.4153	0.283129	0.176741	0.000810385	0.477363
RA138 - 4		2022-11-27 11:51:36	37.489	110	53439.1	350.217	10069.9	138.465	970227	9544.26	0.0595417	0.000415633	0.188467	0.00235818		16.2318	0.275276	0.188467	0.00117897	-0.101059
RA138 - 4		2022-11-28 21:03:57	36.974	110	41785.5	296.002	7623.32	147.608	804967	6720.43	0.0532269	0.000341469	0.182601	0.00301314		16.6362	0.292376	0.182601	0.00150648	-0.0632596
RA138 - 4		2022-12-22 16:02:08	37.513	110	43257.4	269.219	5593.08	67.8744	878432	7997.12	0.0510278	0.000292491	0.129623	0.00163338		18.1253	0.32823	0.12933	0.00081644	0.218832
RA138 - 4		2023-01-03 22:51:29	37.505	110	65088.1	465.265	13399	257.998	1.07238e+06	9949.89	0.0619465	0.000520179	0.206748	0.00356785		15.8995	0.309909	0.206231	0.000812284	0.338132
RA138 - 4		2023-01-04 13:16:58	37.504	110	57190.9	493.95	13520.8	297.416	975981	7868.04	0.0603768	0.000535359	0.235802	0.00381051		15.2143	0.279871	0.236733	0.000889062	0.724599
RA138 - 4		2023-01-30 14:40:29	36.506	110	132333	978.516	28435.5	336.372	1.92222e+06	21491.5	0.0724366	0.000414278	0.0022779	0.0022779		17.1025	0.447201	0.214916	0.00113892	-0.212918		x
RA138 - 4		2023-02-02 14:13:18	38.5255	113	108715	1149.41	23931.4	653.211	1.5704e+06	20542.9	0.0781767	0.000637153	0.22083	0.00381982		15.067	0.308245	0.220183	0.0019099	0.642031
RA138 - 4		2023-02-03 15:01:53	36.505	110	95464.9	676.685	12508.7	168.559	1.64578e+06	16236.5	0.0547476	0.000250659	0.130827	0.0013625		18.0047	0.515648	0.131052	0.000681251	0.138116
RA138 - 4		2023-02-05 19:44:30	28.1381	110	96856.7	836.903	15719	222.304	1.56986e+06	17856.3	0.0618702	0.000362204	0.162071	0.00176497		16.786	0.273198	0.163252	0.00134483	0.112061
RA138 - 4		2023-02-10 17:39:53	36.505	110	134536	1252.27	31283.2	821.344	1.83277e+06	14024.8	0.075638	0.000571315	0.232057	0.0040527		14.1507	0.34167	0.232434	0.00202619	-0.586135		x
RA138 - 4		2023-03-02 11:19:29	38.005	110	97789.1	618.771	17924	211.445	1.56105e+06	14594.3	0.0652706	0.00031595	0.183116	0.00183649		16.4181	0.30994	0.183397	0.000918508	0.530302
RA138 - 4		2023-03-15 18:17:55	41.5001	110	146185	1747.17	33957.3	615.364	2.31325e+06	32689.3	0.0647875	0.000462359	0.232499	0.00275687		15.6408	0.355243	0.23231	0.00137861	-0.162146
RA138 - 4		2023-03-24 17:35:34	38.005	110	73151.1	506.249	11237.5	167.903	1.2825e+06	10870.7	0.0545596	0.0003014	0.153724	0.00201288		16.3077	0.476239	0.15364	0.00100663	-0.0809624
RA138 - 40		2022-11-28 09:08:21	37.488	110	43537	314.694	6725.84	90.4281	856626	8453.4	0.0556346	0.000318851	0.154115	0.00175496		16.6427	0.280288	0.154115	0.000877905	0.187167
RA138 - 40		2022-11-28 22:18:15	37.006	110	42935.1	308.936	6425.86	121.901	858285	7174.36	0.0512141	0.000290725	0.14968	0.00249936		17.3443	0.303717	0.14968	0.00124948	-0.240424
RA138 - 40		2022-12-23 04:47:19	37.506	110	45688	295.134	9342.41	151.408	858238	9009.42	0.0550717	0.000405642	0.205562	0.00336564		16.0409	0.292844	0.204534	0.00168274	0.658375
RA138 - 40		2023-01-05 04:08:11	37.506	110	50301.1	373.3	10267.5	209.291	948114	7172.67	0.0545147	0.000553087	0.204633	0.00382061		16.334	0.303154	0.204396	0.000880866	0.718906
RA138 - 41		2022-11-28 09:09:45	37.475	110	43540.2	369.786	5305.63	81.8665	887475	10446.8	0.0533403	0.000307331	0.123456	0.00180705		17.3599	0.292414	0.123456	0.000903943	-0.0480375
RA138 - 41		2022-11-28 22:19:40	36.996	110	44242.7	283.455	9509.75	170.757	799641	6817.51	0.056777	0.000432919	0.214126	0.00335429		15.6474	0.276882	0.214126	0.00167691	-0.240133
RA138 - 41		2023-01-05 04:09:33	37.51	110	52433.9	468.984	10097.5	360.818	1.00616e+06	10442.3	0.0539505	0.000650696	0.193491	0.00613241		16.5037	0.310995	0.192834	0.0014179	0.800543
RA138 - 42		2022-11-28 09:50:51	38.466	110	44465.5	394.172	5099.82	73.2298	923918	9948.46	0.0521875	0.000254537	0.114936	0.00133723		17.793	0.298463	0.114936	0.000668425	0.139307
RA138 - 42		2022-11-28 22:21:04	36.993	110	49298.7	361.825	11997.5	191.792	853110	8056.93	0.0593051	0.000410806	0.242505	0.00302063		14.9828	0.264044	0.242505	0.00151011	-0.151356
RA138 - 43		2022-11-28 09:52:16	20.189	110	44133.9	378.508	8483.46	169.852	824358	6654.89	0.0590315	0.000507317	0.192496	0.0035376		15.7318	0.269694	0.192496	0.00176824	-0.189606
RA138 - 43		2022-11-28 22:22:28	36.974	110	48199.3	341.19	10357.4	173.76	880042	6604.63	0.0560275	0.000383183	0.214553	0.00306381		15.8619	0.279401	0.214553	0.00153172	-0.0808785
RA138 - 44		2022-11-28 22:23:53	36.99	110	48060.1	344.597	8632.98	159.402	921301	8079.79	0.0535098	0.000392329	0.179897	0.00293573		16.611	0.293419	0.179897	0.00146772	-0.116637
RA138 - 45		2022-11-28 22:25:18	36.972	110	44330.7	297.409	7005.14	131.82	877907	7929.45	0.0517583	0.000347822	0.157951	0.00253895		17.1761	0.302354	0.157951	0.00126937	-0.105246
RA138 - 46		2022-11-28 22:26:42	36.98	110	44218.9	449.702	7442.36	135.785	868939	9945.41	0.0521668	0.000313909	0.167955	0.00232309		17.0446	0.298954	0.167955	0.00116147	0.0371578
RA138 - 47		2022-11-28 22:31:18	36.981	110	45201.2	346.499	6144.81	126.545	914195	8545.13	0.0507424	0.000314609	0.136287	0.00243736		17.5337	0.307811	0.136287	0.00121867	0.00815624
RA138 - 5		2022-11-25 16:23:39	37.478	110	46696	321.343	6732.39	114.762	849188	8530.35	0.0555286	0.000465443	0.143137	0.00215458		17.2938	0.302301	0.144366	0.00107729	0.681873
RA138 - 5		2022-11-27 12:34:37	37.46	110	51535.4	318.733	7825.1	102.974	975087	7361.78	0.0570336	0.000316119	0.153089	0.0017143		16.9833	0.285757	0.153089	0.000857092	0.00781557
RA138 - 5		2022-11-28 21:08:33	36.975	110	39263.5	251.958	6673.82	107.75	768114	7168.47	0.0523746	0.000350479	0.170241	0.00276088		16.9058	0.297549	0.170241	0.00138043	-0.13782
RA138 - 5		2022-12-22 16:43:35	37.532	110	45440.1	325.806	7495.11	156.529	868379	8029.53	0.0542468	0.000331391	0.164704	0.00290814		17.0302	0.308923	0.164986	0.00145455	0.284928
RA138 - 5		2023-01-03 23:18:27	37.506	110	62286.7	472.599	11951.5	210.829	1.04293e+06	10680	0.060987	0.000434859	0.191906	0.00290538		16.1305	0.31237	0.192225	0.000660362	0.718223
RA138 - 5		2023-01-04 14:04:47	19.6648	110	74825	1048.74	24444.8	782.633	1.0989e+06	9983.65	0.0714952	0.00103138	0.324117	0.00676489		12.8357	0.247151	0.327132	0.00153397	0.788855
RA138 - 5		2023-01-30 15:20:26	36.505	110	124952	855.991	27967.6	634.733	1.63769e+06	21181.4	0.080355	0.000767655	0.00470909	0.00470909		15.5619	0.411251	0.223866	0.00235478	-0.721001
RA138 - 5		2023-02-02 14:51:18	36.506	114	110971	883.788	22071.2	447.119	1.6762e+06	12493.4	0.074684	0.000485114	0.198153	0.00274434		16.0582	0.326137	0.19894	0.0013721	0.719975
RA138 - 5		2023-02-03 15:51:14	36.506		110007	1113.62	29246.4	1165.13	1.49603e+06	18538.4	0.0698591	0.00104527	0.262079	0.007754		13.9872	0.41279	0.265906	0.003877	-0.790279
RA138 - 5		2023-02-05 20:25:06	32.1235	110	93583.2	568.665	15261.6	293.316	1.50994e+06	9816.93	0.0619845	0.000318004	0.162606	0.00258741		16.7872	0.27219	0.164047	0.00164361	0.00946515
RA138 - 5		2023-02-10 18:40:02	36.504	110	137879	1304.45	32857.5	922.553	1.90627e+06	11636.1	0.0746312	0.000612732	0.237682	0.00465576		14.5257	0.351502	0.238212	0.00232796	-0.564754
RA138 - 5		2023-03-02 12:09:32	38.008	110	86147.4	641.018	14286	236.375	1.42007e+06	15309.7	0.0629597	0.00035089	0.165982	0.00238753		17.1347	0.324334	0.165927	0.00119395	0.2071
RA138 - 5		2023-03-15 19:17:45	38.8428	110	155813	1542.67	36716.7	819.319	2.40757e+06	24334.8	0.0659946	0.000453749	0.233707	0.00359663		15.4484	0.350562	0.235666	0.00179879	-0.172509
RA138 - 5		2023-03-24 18:39:45	38.004	110	76176.9	610.246	15363.9	330.519	1.25424e+06	12222	0.0580441	0.000367092	0.201887	0.00349141		15.4594	0.452094	0.201714	0.00174595	-0.599996
RA138 - 6		2022-11-25 16:25:04	37.486	110	44896.8	342.504	12799.1	233.739	657076	6632.29	0.0690958	0.000687631	0.286287	0.00389765		13.8981	0.245786	0.285456	0.00194883	0.790118
RA138 - 6		2022-11-27 12:36:01	37.49	110	47765.4	524.903	9725.48	201.521	839755	8328.57	0.0614392	0.000415397	0.203552	0.00249019		15.7664	0.267033	0.203552	0.001245	-0.0942584
RA138 - 6		2022-11-28 21:09:57	37.006	110	39969.1	281.681	6085.17	117.994	795211	6532.94	0.0516099	0.000328759	0.151267	0.00242889		17.156	0.301441	0.151267	0.00121445	-0.106534
RA138 - 6		2022-12-22 16:44:57	37.515	110	49457.5	338.492	11268.7	159.36	855499	8903.88	0.0598669	0.000405943	0.227989	0.00301905		15.4307	0.280827	0.227902	0.0015101	0.578814
RA138 - 6		2023-01-03 23:19:49	37.504	110	61924	1407.3	12941.3	225.609	1.02472e+06	29306.7	0.0620048	0.000551063	0.206639	0.00395207		15.8646	0.310089	0.209364	0.00089665	0.720377
RA138 - 6		2023-01-04 14:05:15	10.4126	110	63374.2	782.483	17314.7	509.49	977779	13239.1	0.0652331	0.0010843	0.272903	0.00634205		14.0677	0.277031	0.273581	0.00143753	0.65559
RA138 - 6		2023-01-30 15:21:49	36.506	110	126183	663.649	24805.7	253.547	1.73232e+06	14587.9	0.0765543	0.000422871	0.00193173	0.00193173		16.3353	0.426971	0.196619	0.000965964	0.00671282
RA138 - 6		2023-02-02 14:52:39	38.6932	110	120743	1169.89	20750.1	525.34	1.91831e+06	15962	0.0711215	0.000414741	0.171291	0.0031386		16.8679	0.34173	0.171895	0.00156922	0.624657
RA138 - 6		2023-02-03 15:52:44	36.508		70615.7	1292.54	17935.5	938.328	971781	15173.2	0.0688422	0.00121494	0.247977	0.00898469		14.1892	0.423983	0.254031	0.00449235	-0.775435
RA138 - 6		2023-02-05 20:26:22	29.9975	110	105728	1050.87	19516.3	502.549	1.65297e+06	16364.4	0.0640005	0.000339267	0.183408	0.00312919		16.2577	0.263827	0.185683	0.00254751	0.293444
RA138 - 6		2023-02-10 18:41:30	36.504	110	134842	1077.54	30806.5	629.433	1.91195e+06	15082.6	0.0727908	0.000457535	0.228464	0.0032786		14.8968	0.358328	0.228372	0.00163938	-0.566923
RA138 - 6		2023-03-02 12:11:03	38.005	110	96660.1	1026.38	12292.7	231.568	1.67775e+06	16168.9	0.0600893	0.000352739	0.127154	0.0019898		17.9562	0.340287	0.127247	0.000995054	0.118599
RA138 - 6		2023-03-15 19:19:13	37.2748	110	150006	1276.09	34820.1	817.712	2.31535e+06	17757.3	0.0662737	0.00054698	0.232083	0.00408325		15.3845	0.350876	0.232145	0.00204214	-0.666965
RA138 - 6		2023-03-24 18:41:19	38.007	110	73695.7	686.639	14583.8	345.794	1.23778e+06	11156.7	0.0570262	0.000367946	0.196034	0.00348038		15.7425	0.460482	0.197919	0.00174043	-0.454248
RA138 - 7		2022-11-25 17:09:02	37.482	110	72863	852.124	21048.1	520.074	1.04636e+06	11258.9	0.0702783	0.00068052	0.288665	0.00456052		13.6642	0.241141	0.289255	0.00228026	0.882542
RA138 - 7		2022-11-27 13:20:25	37.49	110	57854.6	693.297	15533.3	278.989	931569	13405.9	0.0675483	0.000487066	0.269401	0.00388705		14.3618	0.243908	0.269401	0.00194343	-0.532952
RA138 - 7		2022-11-28 21:11:22	36.854	110	43052.1	720.558	7979.65	150.201	820431	18271.2	0.0539335	0.000463692	0.182184	0.00403541		16.4167	0.292319	0.182184	0.00201774	-0.468233
RA138 - 7		2022-12-22 17:28:07	37.504	110	50598.4	755.221	12008	494.786	862951	7743.24	0.0605512	0.000674443	0.235556	0.00603941		15.225	0.285132	0.23738	0.00302014	0.949172
RA138 - 7		2023-01-03 23:46:51	37.504	110	68259.1	417.312	15100.5	244.468	1.10673e+06	7638.71	0.0629953	0.000438388	0.221094	0.0029775		15.5907	0.301673	0.221623	0.000654719	0.553988
RA138 - 7		2023-01-04 14:06:09	37.506	110	78010	2114.73	21748.4	714.82	1.21446e+06	32365.1	0.0659618	0.000653095	0.27933	0.00386202		13.912	0.257743	0.279165	0.000874814	0.639589
RA138 - 7		2023-01-30 16:00:00	36.506	110	141962	2397.06	40605.6	1772.03	1.66395e+06	13727.5	0.0893533	0.0013633	0.00757814	0.00757814		13.9394	0.37759	0.286081	0.00378946	-0.867074
RA138 - 7		2023-02-02 15:30:46	35.7057	110	109262	1919.82	30470	1034.28	1.40114e+06	14357.8	0.0875972	0.00112572	0.280924	0.00565092		13.7659	0.289813	0.27894	0.0028252	0.896174
RA138 - 7		2023-02-03 16:41:43	36.504	110	91862.9	606.365	11596.7	265.906	1.49254e+06	13611.9	0.0581909	0.000293406	0.126214	0.00292851		16.6194	0.476297	0.126262	0.00146425	-0.49631
RA138 - 7		2023-02-05 21:07:06	26.3103	110	106973	826.076	17289.5	315.968	1.71555e+06	14706.9	0.0623829	0.000408047	0.162489	0.00307109		16.6156	0.271508	0.162583	0.0016033	0.345414
RA138 - 7		2023-02-10 19:41:36	36.504	110	120579	768.934	20225.9	237.889	1.91104e+06	16127.2	0.0650599	0.000310526	0.167794	0.00153485		16.8091	0.402863	0.167673	0.000767563	-0.0599574
RA138 - 7		2023-03-02 12:59:18	38.003	110	102490	769.17	24449.5	426.646	1.49498e+06	10695.3	0.0712992	0.000546804	0.237334	0.00371295		15.1943	0.290376	0.238692	0.00185635	-0.000220483
RA138 - 7		2023-03-15 20:19:02	40.0617	110	167518	9480.42	50430.9	4639.32	2.35461e+06	117403	0.0720518	0.00151797	0.272613	0.0107367		14.1675	0.351084	0.301074	0.00536745	-0.676238
RA138 - 7		2023-03-24 19:43:43	38.004	110	81763.6	1010.98	16820.2	595.802	1.22134e+06	10983.9	0.0639549	0.000709985	0.203146	0.00531423		14.3203	0.423845	0.205745	0.00265733	-0.73367		x
RA138 - 8		2022-11-25 17:10:26	37.459	110	57399.5	673.561	11921	288.615	946663	11556.6	0.0607356	0.000403128	0.207264	0.00324305		15.8111	0.273405	0.20796	0.00162153	0.461573
RA138 - 8		2022-11-27 13:21:48	27.085	110	62315.1	428.364	22018.2	262.544	879549	9194.76	0.0782332	0.000528895	0.353964	0.00296366		12.4007	0.210028	0.353964	0.00148177	-0.0777705
RA138 - 8		2022-11-28 21:12:46	36.966	110	36730	173.628	5477.33	79.9064	734127	4120.54	0.0513208	0.000322841	0.149494	0.00233812		17.2523	0.303009	0.149494	0.00114343	0.0602422
RA138 - 8		2022-12-22 17:29:29	37.506	110	49262.3	459.911	10378.3	224.933	879311	8705.85	0.0579234	0.000337902	0.210055	0.00326938		15.9144	0.288322	0.210728	0.00163485	0.402422
RA138 - 8		2023-01-03 23:48:15	10.4128	110	183773	11264	114629	9404.14	1.01186e+06	8803.13	0.18833	0.011419	0.61243	0.0164462		5.21452	0.186661	0.624878	0.00362062	0.978677
RA138 - 8		2023-01-04 14:55:29	37.506	110	51899.7	760.098	10479.9	288.577	909971	10169.9	0.0585955	0.00066234	0.203487	0.00449361		15.6437	0.292948	0.202196	0.00102107	0.64339
RA138 - 8		2023-01-30 16:01:25	36.506	110	139334	1233.61	39067.1	796.032	1.64529e+06	20725.6	0.0885937	0.000853371	0.0044044	0.0044044		14.0544	0.371515	0.280433	0.00220242	-0.722816
RA138 - 8		2023-02-02 15:32:06	37.3278	110	100950	951.446	19545.1	453.791	1.51918e+06	13958.3	0.075036	0.000495869	0.193009	0.00337337		16.0723	0.32657	0.193659	0.00168653	0.250265
RA138 - 8		2023-02-03 16:43:14	36.504	110	92010.4	485.276	10954	165.477	1.51231e+06	10614.3	0.0574337	0.000308687	0.119101	0.00162418		16.8342	0.482706	0.119072	0.000812088	0.00515528
RA138 - 8		2023-02-05 21:47:47	21.116	110	109893	1035.22	19297.1	359.86	1.73246e+06	18520.2	0.0633026	0.000434589	0.175492	0.00272759		16.2654	0.266326	0.176639	0.00183436	0.383823
RA138 - 8		2023-02-10 19:43:04	36.506	110	130032	1326.23	28650.8	1124.72	1.91451e+06	12588	0.0701546	0.000771017	0.219946	0.00551955		15.591	0.381555	0.220248	0.00276025	-0.85093
RA138 - 8		2023-03-02 13:00:48	38.017	110	102637	1030.4	31544.4	533.631	1.29749e+06	21547.1	0.0824303	0.000928042	0.30847	0.00432935		13.1436	0.25696	0.307517	0.00216452	0.912159
RA138 - 8		2023-03-15 20:20:30	41.8901	110	86377.5	2348.45	17055.1	417.505	1.44384e+06	49475.9	0.0619341	0.000826657	0.200382	0.0076049		16.4817	0.385711	0.197466	0.00361182	-0.551441
RA138 - 8		2023-03-24 19:45:17	38.004	110	84820.8	639.785	15601.9	339.984	1.3168e+06	10539.2	0.0615041	0.00048979	0.184147	0.00324178		14.898	0.437165	0.183965	0.00162103	-0.428437
RA138 - 9		2022-11-25 17:51:16	37.49	110	56881.2	480.079	8799.53	127.316	1.00938e+06	11812.7	0.0566708	0.000422314	0.155977	0.00207238		16.9452	0.294418	0.154905	0.00103619	0.494157
RA138 - 9		2022-11-27 14:04:32	37.492	110	51564.5	545.831	18240.3	374.949	689658	5218.45	0.0803111	0.000846107	0.357469	0.00474688		12.0885	0.210484	0.357469	0.00237391	-0.651095
RA138 - 9		2022-11-28 21:14:11	36.942	110	43712.4	433.094	9296.84	254.144	793590	5887.07	0.056429	0.000462521	0.212013	0.0043013		15.6904	0.278644	0.212013	0.00215076	-0.427786
RA138 - 9		2022-12-22 18:10:54	37.503	110	41706	307.873	6272.75	116.718	813899	7495.94	0.0530072	0.000310654	0.150243	0.00223167		17.344	0.31426	0.150442	0.00111523	0.404897
RA138 - 9		2023-01-03 23:48:34	15.4279	110	67124.5	1512.16	19982.8	1174.93	910272	6550	0.0736178	0.00157673	0.293763	0.0111437		13.3396	0.291334	0.298235	0.00245332	0.84804
RA138 - 9		2023-01-04 14:56:52	37.505	110	57281.4	708.255	13938.1	433.203	981562	8427.19	0.0600789	0.000586297	0.241137	0.00507107		15.257	0.282373	0.243654	0.00115229	0.732054
RA138 - 9		2023-01-30 16:39:47	36.506	110	140704	2397.64	37948.4	1367.89	1.62801e+06	21235.6	0.088658	0.00129519	0.00633946	0.00633946		13.8771	0.37466	0.269751	0.00316999	-0.909742
RA138 - 9		2023-02-02 16:10:20	36.504	110	98625.5	734.809	18902.2	336.849	1.44508e+06	16597.9	0.0771656	0.000591428	0.19205	0.00315975		15.6941	0.320338	0.191703	0.00157977	0.70978
RA138 - 9		2023-02-03 17:32:36	36.504	110	81596.3	775.655	12781.8	458.457	1.27107e+06	13971.4	0.0602998	0.000440035	0.155059	0.00412052		15.9463	0.458938	0.156674	0.00206026	-0.730157		x
RA138 - 9		2023-02-05 22:34:37	25.0397	110	98939.9	1242.12	12721.2	201.406	1.70855e+06	21016.3	0.0581674	0.000453922	0.128076	0.00168045		17.5458	0.28913	0.129337	0.00129898	0.146559
RA138 - 9		2023-02-10 20:43:18	36.504	110	131161	902.057	27796.8	509.511	1.92097e+06	14888.8	0.070289	0.000425312	0.212078	0.00281507		15.6469	0.376135	0.211845	0.00140709	-0.494343
RA138 - 9		2023-03-02 13:50:35	28.5398	110	92179.6	1307.6	14759.2	656.976	1.51984e+06	25753.7	0.0637246	0.000418801	0.158039	0.00570025		17.0273	0.323661	0.160205	0.00284981	0.0355471
RA138 - 9		2023-03-15 21:20:23	39.5309	110	84617.8	919.725	15062.6	313.384	1.41727e+06	12437.2	0.0612904	0.000452496	0.177883	0.00279988		16.628	0.377993	0.178023	0.00139973	-0.0046383
RA138 - 9		2023-03-24 20:49:24	38.004	110	81715.3	545.658	14613.6	250.447	1.34302e+06	9575.9	0.0581882	0.000341012	0.179079	0.00267038		15.9825	0.467004	0.17886	0.00133532	-0.0713158
RA138_001		2023-04-13 15:53:37	36.505	110	73100.7	701.621	12844.8	272.066	1.36448e+06	17767.3	0.0593125	0.000347951	0.17537	0.00271027		17.098	0.29424	0.175744	0.00135498	-0.00163491
RA138_001		2023-04-14 14:17:39	36.506	110	83466.3	482.669	14645.5	265.307	1.36437e+06	8629.68	0.0634123	0.000368954	0.175318	0.00286741		16.28	0.413676	0.175594	0.00143369	0.545393
RA138_001		2023-05-11 13:25:36	36.506	110	78852	486.74	12695.3	238.396	1.4886e+06	10402.8	0.0547146	0.000281457	0.160805	0.00258593		17.2566	0.323384	0.161029	0.00129301	0.252561
RA138_001		2023-07-28 10:49:25	37.003	110	88125.5	525.398	19714	326.451	1.28523e+06	7670.08	0.0706022	0.000483135	0.223509	0.00313833		15.4218	0.287574	0.223747	0.00156902	0.0582103
RA138_001		2023-05-22 14:58:46	37.507	110	120633	1642.94	28278.3	640.235	1.81591e+06	19361.1	0.0663727	0.000466021	0.236446	0.00368128		14.2034	0.285221	0.234359	0.00184021	0.0699431
RA138_001		2023-06-14 13:20:56	36.512	110	161612	3213.19	50195.8	1358.06	2.05236e+06	41940	0.0804476	0.00123548	0.311499	0.00488993		13.0362	0.316443	0.310632	0.00244405	0.201644
RA-138_001		2023-06-26 18:36:59	36.503	110	31500	851.628	10625	627.49	490764	6664.4	0.072049	0.00172885	0.333123	0.011467		12.6605	0.285871	0.337479	0.00573224	-0.870071
RA138_002		2023-04-13 15:55:08	36.508	110	68703	458.68	9128.03	148.706	1.36048e+06	10932.7	0.0558688	0.000287597	0.132744	0.00180602		18.1528	0.311347	0.132885	0.000902913	0.026512
RA138_002		2023-04-14 14:19:09	36.506	110	86986.9	497.203	11809.2	107.853	1.52385e+06	13660.1	0.05922	0.000295074	0.136087	0.00136603		17.4313	0.442155	0.135856	0.000683007	0.176807
RA138_002		2023-05-11 13:27:07	36.506	110	84688.9	386.946	12684.7	146.726	1.62622e+06	9837.61	0.0538783	0.0002531	0.149606	0.00162632		17.5281	0.327956	0.149805	0.000813194	0.373339
RA138_002		2023-07-28 10:50:58	37.004	110	114013	1222.32	30506	763.263	1.50199e+06	17698.1	0.0775927	0.00078887	0.265833	0.00460341		14.0406	0.267086	0.267616	0.00230141	-0.702381
RA138_002		2023-05-22 15:03:20	37.507	110	123569	796.463	28226.5	507.471	2.06563e+06	13890.3	0.0607409	0.000395094	0.226992	0.0030516		15.5135	0.310853	0.228371	0.00152558	0.49822
RA138_002		2023-06-14 13:22:22	36.506	110	137925	1827.21	29457.7	606.36	2.1167e+06	30684.7	0.0672305	0.000520961	0.211095	0.00409074		15.5968	0.364205	0.213603	0.00204461	-0.0630296
RA-138_002		2023-06-26 18:38:30	36.506	110	23072.6	240.271	3798.08	109.275	491087	5644.91	0.0529913	0.000460148	0.163816	0.00425059		17.2138	0.33765	0.164701	0.00212487	-0.0350653
RA138_003		2023-04-13 16:48:08	36.504	110	74868	460.939	10967.5	157.453	1.45065e+06	12865.5	0.0571181	0.0003384	0.146411	0.001765		17.7864	0.306175	0.146516	0.000882596	-0.135108
RA138_003		2023-04-14 15:08:44	36.504	110	91143.9	584.602	15117.4	245.992	1.53049e+06	11950.7	0.0617374	0.000354591	0.165726	0.00216655		16.6818	0.423816	0.165983	0.00108326	0.604973
RA138_003		2023-05-11 14:18:14	36.504	110	85430.9	513.222	13959	201.676	1.58264e+06	11834.8	0.0558016	0.000290454	0.163593	0.0020558		17.0283	0.319176	0.163422	0.00102784	0.437864
RA138_003		2023-07-28 10:52:32	37.004	110	103468	781.693	19141.9	279.206	1.59999e+06	16508.7	0.0670459	0.000337885	0.184395	0.0020916		16.2586	0.300834	0.185038	0.00104564	0.187518
RA138_003		2023-05-22 15:28:37	37.504	110	116677	801.828	27353.2	685.452	1.87849e+06	16476.5	0.0627257	0.000510166	0.232608	0.00416006		15.0032	0.30285	0.23438	0.00208032	0.258486
RA138_003		2023-06-14 13:47:40	37.2307	110	126135	744.45	23541.9	460.142	1.931e+06	17462.2	0.0679348	0.000451517	0.186134	0.00343704		15.4136	0.358617	0.186663	0.00171876	-0.266911
RA-138_003		2023-06-26 18:40:01	36.506	110	25571.8	242.163	4680.94	130.859	522967	5556.03	0.0552128	0.000490375	0.182553	0.00443022		16.5214	0.324433	0.183147	0.00221469	-0.296657
RA138_004		2023-04-13 16:49:39	36.506	110	75391.5	418.342	13827.9	222.704	1.37589e+06	7310.32	0.0605004	0.000328573	0.183296	0.00258821		16.7929	0.288388	0.183447	0.00129425	-0.346306
RA138_004		2023-04-14 15:10:15	36.51	110	94051.3	463.116	12348.3	120.04	1.66711e+06	11955.1	0.0584748	0.000253637	0.13133	0.0011387		17.6114	0.446201	0.131388	0.000569341	0.296561
RA138_004		2023-05-11 14:19:45	36.506	110	85644.2	443.085	14761.1	171.112	1.56691e+06	11406.9	0.0564753	0.000291086	0.171949	0.00170669		16.8278	0.315359	0.172382	0.000853289	0.405912
RA138_004		2023-07-28 11:42:14	37.012	110	94394.6	883.199	16692.8	314.392	1.45268e+06	16131.3	0.0671156	0.000337726	0.176025	0.00223151		16.4844	0.305004	0.176874	0.0011159	-0.0522418
RA138_004		2023-05-22 15:52:15	37.503	110	111792	652.196	24052.6	348.139	1.86175e+06	13749.7	0.0611702	0.000399965	0.216463	0.00265182		15.3899	0.308419	0.215103	0.00132618	0.722917
RA138_004		2023-06-14 14:19:16	19.1603	110	156555	2921.21	45227.5	1957.72	2.08078e+06	25355	0.0789186	0.00126812	0.28545	0.00781835		13.2803	0.323895	0.288927	0.00391055	-0.669195
RA-138_004		2023-06-26 18:41:32	36.504	110	28373.8	431.693	9394.23	243.333	452723	5640.14	0.0696963	0.00103983	0.329067	0.00669822		13.0882	0.268721	0.331261	0.0033485	-0.34672
RA138_005		2023-04-13 17:42:54	36.505	110	32459.1	390.983	4888.05	79.6251	613107	11397.6	0.0587226	0.000502803	0.151056	0.00268944		17.3312	0.30311	0.150617	0.00134476	-0.135832
RA138_005		2023-04-14 16:00:12	36.504	110	82539.4	407.84	10787.4	108.849	1.46026e+06	9408.06	0.0586147	0.000285688	0.130698	0.00125612		17.5283	0.444524	0.130788	0.000628015	0.341654
RA138_005		2023-05-11 15:11:08	36.504	110	80257	368.932	10781.8	150.116	1.56065e+06	8976.68	0.0532341	0.00028986	0.134223	0.00175064		17.9317	0.336415	0.134363	0.000875312	0.430627
RA138_005		2023-07-28 11:43:46	37.003	110	91455.7	647.418	15937	268.096	1.42801e+06	11181	0.0660578	0.00038499	0.173944	0.0021769		16.7544	0.310976	0.174293	0.00108862	0.189785
RA138_005		2023-05-22 16:17:38	37.504	110	106049	488.731	14633	134.209	1.97595e+06	17066.2	0.0544264	0.000301978	0.137988	0.00127283		17.3259	0.345922	0.137951	0.000636548	0.67778
RA138_005		2023-06-14 14:20:43	36.0558	110	133251	853.848	28420.1	413.652	1.99012e+06	13722.2	0.069685	0.000384078	0.21202	0.0024662		15.0416	0.348845	0.213308	0.00123354	-0.240756
RA-138_005		2023-06-26 18:43:04	36.503	110	23743.8	215.944	2831.37	101.978	529555	5521.93	0.0503043	0.000380411	0.119571	0.00398945		18.1337	0.353581	0.119309	0.0019944	-0.397343
RA138_006		2023-04-13 17:44:25	36.512	110	65569.4	410.506	10590.1	192.344	1.23753e+06	9141.51	0.0585104	0.000342732	0.161214	0.0025443		17.3949	0.299336	0.161538	0.00127219	-0.145365
RA138_006		2023-04-14 16:01:43	36.506	110	81858.8	548.411	12236.8	208.621	1.41938e+06	10344.9	0.0598937	0.000307227	0.150002	0.00229819		17.1528	0.435217	0.149595	0.00114901	0.49174
RA138_006		2023-05-11 15:12:38	36.504	110	86310.2	423.949	12249.6	116.597	1.65406e+06	11029.6	0.0538393	0.000277134	0.141902	0.00146889		17.7319	0.332295	0.141949	0.000734443	0.365706
RA138_006		2023-07-28 11:45:19	37.004	110	98477	551.292	21391.6	333.218	1.42346e+06	7693.81	0.0715455	0.000390064	0.21702	0.00273088		15.4749	0.286785	0.217266	0.00136568	-0.275531
RA138_006		2023-05-22 16:41:22	37.503	110	119303	950.82	19990.6	450.945	2.12499e+06	19312.9	0.0569496	0.00027804	0.165066	0.00305381		16.5999	0.330703	0.167521	0.00152701	0.0529219
RA138_006		2023-06-14 15:13:02	36.506	110	129689	819.353	25301.4	452.966	2.01158e+06	16479.9	0.0672014	0.000467578	0.194191	0.00301329		15.6995	0.365625	0.195116	0.00150662	-0.132686
RA-138_006		2023-06-26 18:44:35	36.503	110	23928.2	274.119	4483.04	174.902	494339	4472.99	0.0544596	0.000574704	0.185329	0.00545181		16.7502	0.332372	0.187452	0.00272548	-0.497585
RA138_007		2023-04-13 18:37:37	36.518	110	73629.2	704.178	10439.1	170.775	1.41363e+06	18647.8	0.057696	0.000492295	0.141795	0.00194671		17.6708	0.308986	0.141804	0.000973346	0.148028
RA138_007		2023-04-14 16:49:44	36.505	110	84979.8	405.318	11604.3	186.993	1.51081e+06	9298.87	0.0582665	0.000280412	0.136416	0.00193058		17.5922	0.446092	0.136652	0.000965341	0.470586
RA138_007		2023-05-11 16:02:04	36.504	110	89728.9	582.169	13607.1	169.634	1.68306e+06	14442	0.0550757	0.000330584	0.151768	0.00182382		17.3768	0.326742	0.151671	0.000912061	0.285181
RA138_007		2023-07-28 12:29:58	37.004	110	98317.8	754.333	19385	427.704	1.45166e+06	9159.76	0.0696899	0.000433869	0.198271	0.00338291		16.019	0.297842	0.197205	0.00169127	-0.301093
RA138_007		2023-05-22 17:06:59	37.504	110	119654	506.543	21011.9	201.914	2.0988e+06	14997.9	0.0579376	0.000290319	0.175246	0.00162483		16.3728	0.326309	0.175563	0.000812381	0.0356319
RA138_007		2023-06-14 15:14:29	36.5564	110	138146	2063.07	43091.1	1598.83	1.73379e+06	11297	0.0821577	0.00115983	0.306274	0.00592236		12.8446	0.309365	0.311962	0.00296116	-0.939353
RA-138_007		2023-06-26 18:57:14	36.504	110	28246.8	601.255	7689.68	571.553	511774	4531.53	0.0624891	0.00159716	0.267225	0.0130808		14.5986	0.335837	0.272374	0.00654014	-0.851024
RA138_008		2023-04-13 18:39:08	36.511	110	72856.4	380.409	10773.8	137.191	1.40166e+06	9505.32	0.0575833	0.000405645	0.14782	0.00187594		17.7063	0.306658	0.147903	0.00093796	0.120368
RA138_008		2023-04-14 16:51:15	36.504	110	91073.2	593.519	15842.3	293.549	1.54751e+06	11772.8	0.0610202	0.000304386	0.173586	0.00261234		16.797	0.426072	0.174078	0.00130624	0.485377
RA138_008		2023-05-11 16:03:35	36.503	110	91488.9	605.144	17300.7	276.405	1.64321e+06	12825.4	0.0576179	0.000365156	0.188627	0.00260738		16.6109	0.312797	0.189134	0.0013039	0.510691
RA138_008		2023-07-28 12:31:29	37.006	110	92662.9	537.026	13563.6	177.734	1.47954e+06	10046.6	0.0643437	0.000306746	0.147159	0.00160263		17.3537	0.320784	0.146404	0.00080121	0.0374326
RA138_008		2023-05-22 17:31:04	37.504	110	126336	1143.05	23236	633.86	2.19027e+06	17052	0.0585291	0.000501485	0.181755	0.00418023		16.2664	0.329081	0.183878	0.00208992	0.148975
RA138_008		2023-06-14 16:06:33	36.503	110	127955	1200.72	28577.7	660.915	1.95031e+06	17330.6	0.0684301	0.000483288	0.222149	0.00333824		15.5808	0.362984	0.223368	0.00166896	-0.678676
RA-138_008		2023-06-26 19:50:31	36.508	110	27816.8	666.828	5729.29	415.293	546091	4808.73	0.0568262	0.00111855	0.200978	0.00849778		16.0569	0.345415	0.206073	0.00425032	-0.871072
RA138_009		2023-04-13 19:30:30	36.505	110	74578.9	773.394	12565.9	426.957	1.37394e+06	11745.5	0.0600011	0.000664537	0.169303	0.0046855		17.021	0.30363	0.16852	0.00234265	-0.691638
RA138_009		2023-04-14 17:41:16	36.508	110	89148.7	583.009	12118.7	143.821	1.57076e+06	12871.2	0.058707	0.000292444	0.136517	0.00154649		17.4179	0.441815	0.136037	0.000773535	0.250773
RA138_009		2023-05-11 16:54:46	36.503	110	78741.3	496.704	11263.6	141.516	1.49555e+06	11241.6	0.0545334	0.000299495	0.142979	0.00170056		17.5657	0.329608	0.143069	0.000850256	0.238925
RA138_009		2023-07-28 12:33:03	37.004	110	100836	677.775	18871.2	296.108	1.48524e+06	11274.6	0.0696916	0.000378203	0.188285	0.00225175		16.0256	0.296962	0.187183	0.0011257	-0.256981
RA138_009		2023-05-22 17:56:21	37.504	110	103908	512.163	24326	229.768	1.64198e+06	8076.43	0.0639196	0.000335801	0.234798	0.00186702		14.9547	0.298281	0.234054	0.000933413	0.522491
RA138_009		2023-06-14 16:08:00	36.504	110	137384	911.967	31603.1	664.115	2.05652e+06	11892.8	0.0693356	0.000584366	0.228312	0.00370039		15.3822	0.360098	0.230062	0.00184997	-0.443684
RA-138_009		2023-06-26 20:45:44	36.504	110	24715.3	465.667	7115.78	308.362	425326	3393.65	0.0652198	0.00107851	0.287416	0.00802946		13.9936	0.291613	0.288061	0.0040154	-0.614741
RA138_010		2023-04-13 19:32:02	36.503	110	73093.8	587.87	12600.4	257.869	1.34523e+06	10994	0.0601749	0.000558567	0.17188	0.00298589		16.9727	0.298395	0.172416	0.00149288	-0.128467
RA138_010		2023-04-14 17:42:48	36.513	110	93642.6	598.713	14353.3	232.117	1.61757e+06	11618.8	0.0600532	0.000365967	0.153019	0.00206575		17.0262	0.432913	0.153389	0.00103326	0.505662
RA138_010		2023-05-11 16:56:17	36.505	110	80283.8	443.66	11485.9	140.917	1.51687e+06	9588.92	0.054588	0.000343008	0.143302	0.00194067		17.5482	0.330368	0.14309	0.000962535	0.136107
RA138_010		2023-07-28 13:22:32	37.016	110	100621	496.034	15732.3	148.886	1.5738e+06	12295.2	0.0660678	0.00033851	0.156588	0.00147254		16.9944	0.314546	0.156382	0.000736192	0.0855207
RA138_010		2023-05-22 18:20:18	22.1099	110	116181	848.263	23550.9	439.578	1.96832e+06	18256.3	0.0596437	0.000474129	0.20324	0.00388483		16.088	0.324454	0.20266	0.00194224	0.485517
RA138_010		2023-06-14 16:59:59	36.52	110	123377	630.731	31868	384.576	1.80689e+06	18908.7	0.0711924	0.000483323	0.255968	0.00284622		15.1567	0.352796	0.25833	0.00142304	-0.422733
RA-138_010		2023-06-26 21:38:58	36.507	110	26279.3	303.07	5811.49	197.478	505351	3552.86	0.0585851	0.000673746	0.218598	0.00583311		15.5818	0.311232	0.221259	0.00291605	-0.393658
RA138_011		2023-04-13 20:24:57	36.516	110	77136	844.632	15421	351.453	1.35039e+06	16346.6	0.0633592	0.000572746	0.199564	0.00357966		16.1473	0.283372	0.199955	0.00178962	-0.0781494
RA138_011		2023-04-14 18:30:54	36.503	110	96123.5	1184.63	22874	814.37	1.44853e+06	11384.2	0.0686269	0.000714258	0.236077	0.00567538		14.8654	0.383138	0.238137	0.00283722	0.898862
RA138_011		2023-05-11 17:47:31	36.512	110	83758.4	582.293	12770.9	151.572	1.55975e+06	14902	0.0556076	0.000398582	0.153135	0.00190346		17.2183	0.325514	0.152498	0.000951477	0.321018
RA138_011		2023-07-28 13:24:03	37.006	110	101311	500.32	17129.6	154.235	1.55941e+06	10701.3	0.0670978	0.000287324	0.169166	0.00142495		16.7354	0.308858	0.169112	0.00071238	0.243318
RA138_011		2023-05-22 18:45:39	37.505	110	120278	780.668	20985	470.162	2.11149e+06	20139.6	0.0578925	0.000400397	0.173785	0.00335077		16.6387	0.333973	0.174429	0.00167519	0.212644
RA138_011		2023-06-14 17:01:25	36.508	110	150530	2684.42	46456.2	1592.38	1.99033e+06	24934.9	0.0795019	0.000860571	0.309459	0.00651831		13.5769	0.321164	0.308655	0.00325898	-0.662229
RA-138_011		2023-06-26 22:33:35	36.514	110	28177.3	405.569	5971.92	215.803	550279	5177.31	0.057469	0.000641431	0.208977	0.0053356		15.888	0.316583	0.212052	0.00266815	-0.34595
RA138_012		2023-04-13 20:26:28	36.503	110	73091.9	612.043	11009.6	194.662	1.36552e+06	13112.2	0.0591122	0.000424225	0.150091	0.00207314		17.3082	0.299999	0.150652	0.00103645	0.128535
RA138_012		2023-04-14 18:32:25	36.504	110	88678.4	496.159	14867.2	206.412	1.48995e+06	10520.9	0.0616818	0.000357555	0.167524	0.00214002		16.538	0.420211	0.167774	0.0010698	0.344431
RA138_012		2023-05-11 17:49:02	36.505	110	88795.8	529.35	15629.1	193.759	1.601e+06	13745.3	0.0574704	0.000357197	0.176076	0.00225131		16.6597	0.313547	0.176041	0.00112535	0.331666
RA138_012		2023-07-28 13:25:36	37.017	110	104551	630.161	22672.2	252.301	1.49999e+06	14778	0.0719147	0.000379577	0.216777	0.00242793		15.6163	0.289209	0.216895	0.00121378	-0.0306896
RA138_012		2023-05-22 19:09:12	37.504	110	111048	617.013	23636	304.575	1.81909e+06	13695.7	0.0621593	0.000386305	0.213175	0.00252975		15.5478	0.311182	0.212794	0.00126472	0.768386
RA138_012		2023-06-14 17:51:27	36.506	110	126847	855.761	27521.3	447.301	1.83944e+06	14325	0.0714096	0.000392588	0.216091	0.00246688		15.2778	0.35431	0.216989	0.00123338	-0.121043
RA-138_012		2023-06-26 23:23:15	36.503	110	27456.6	483.221	6427.13	228.554	507183	5305.14	0.0606736	0.000925159	0.235959	0.00594195		15.0519	0.309947	0.234206	0.00297137	-0.52285
RA138_013		2023-04-13 21:19:26	36.51	110	72200.9	767.517	12543.6	282.952	1.30423e+06	13967	0.0611929	0.000574195	0.17521	0.00336635		16.7483	0.294674	0.173762	0.00168328	-0.218646
RA138_013		2023-04-14 19:22:09	36.503	110	94289.5	1312.62	17442.2	905.99	1.53519e+06	12322.7	0.0637248	0.000877556	0.183603	0.00691978		15.9702	0.417864	0.18512	0.00345866	0.837811
RA138_013		2023-05-11 18:38:33	36.504	110	77142.7	483.313	12674.7	238.521	1.44042e+06	11006.5	0.0553474	0.000299159	0.164058	0.002606		17.2774	0.32409	0.164329	0.00130303	0.394854
RA138_013		2023-07-28 14:10:33	37.004	110	101647	600.931	15275	144.636	1.60087e+06	13130	0.065564	0.000280338	0.150847	0.00147885		17.1721	0.316911	0.150304	0.000739577	0.17318
RA138_013		2023-05-22 19:34:30	37.506	110	117133	558.773	22262.4	260.171	1.98621e+06	11063.9	0.0595646	0.000368941	0.190416	0.00187978		16.2757	0.325724	0.190016	0.000939849	0.846488
RA138_013		2023-06-14 17:52:53	36.504	110	149514	1189.25	41438.1	1002.81	2.00319e+06	14179	0.0778847	0.000681331	0.275957	0.00488648		14.0117	0.328425	0.277185	0.0024431	-0.744546
RA-138_013		2023-06-27 00:16:11	36.504	110	29670.1	735.637	6053.7	141.956	588842	21493.1	0.0570753	0.000642443	0.2012	0.00619974		16.0043	0.319114	0.204141	0.00309945	-0.567543
RA138_014		2023-04-13 21:20:57	36.516	110	73069.3	498.773	12000.1	185.895	1.353e+06	12838.4	0.0597527	0.000452384	0.164098	0.00222482		17.1528	0.298023	0.164257	0.0011125	-0.199444
RA138_014		2023-04-14 19:23:40	36.504	110	92667.8	744.402	13470.2	215.8	1.62047e+06	16764.1	0.0593601	0.000396844	0.145342	0.0018909		17.1433	0.436525	0.145465	0.000945117	0.36542
RA138_014		2023-05-11 18:40:04	36.506	110	86011.7	554.721	14377.9	245.718	1.59073e+06	12715.3	0.0562189	0.000358179	0.166677	0.00245693		17.0088	0.320338	0.16719	0.00122851	0.414129
RA138_014		2023-07-28 14:12:07	37.004	110	103332	705.638	18669.2	322.283	1.55403e+06	9266.37	0.0687989	0.000371451	0.18063	0.0023172		16.3657	0.303231	0.180707	0.00115884	-0.457412
RA138_014		2023-05-22 19:58:17	37.504	110	119299	864.935	29304.3	524.711	1.90503e+06	15474.4	0.0637165	0.000426318	0.244582	0.00315311		15.2524	0.305855	0.245579	0.00157673	0.804575
RA138_014		2023-06-14 18:44:29	36.504	110	126115	867.98	22715.7	478.505	1.94652e+06	13222.8	0.067277	0.000415067	0.178708	0.00283388		16.3661	0.38024	0.180141	0.00141722	-0.159862
RA-138_014		2023-06-27 01:10:49	36.505	110	25651.6	186.912	3669.62	81.1085	551945	3437.82	0.0523334	0.000405702	0.142202	0.00279076		17.4584	0.34074	0.143131	0.00139485	-0.0196759
RA138_015		2023-04-13 22:13:51	36.505	110	70917.4	481.505	12741	201.896	1.28358e+06	9349.8	0.0610947	0.000437281	0.179488	0.00248642		16.8046	0.291235	0.179691	0.00124343	-0.132482
RA138_015		2023-04-14 20:13:39	36.505	110	85831.3	612.824	13615.8	230.66	1.45046e+06	11578.3	0.0612763	0.000454621	0.158223	0.00226658		16.5679	0.422715	0.158749	0.00113342	0.324596
RA138_015		2023-05-11 19:31:22	36.504	110	84691.1	550.292	13883.4	213.924	1.54753e+06	12986.2	0.0566834	0.00039802	0.164233	0.00247896		16.8437	0.318201	0.163957	0.00123997	0.434625
RA138_015		2023-07-28 14:13:40	37.003	110	93811.4	440.606	14071.9	131.907	1.47333e+06	11014.7	0.0655059	0.000309826	0.149903	0.00146797		17.1895	0.317706	0.150031	0.000734168	0.0934723
RA138_015		2023-05-22 20:23:44	37.505	110	109160	622.584	17272.2	187.439	1.95805e+06	12909	0.0566161	0.000258648	0.15909	0.00145756		17.2003	0.342345	0.158191	0.000729005	0.346575
RA138_015		2023-06-14 18:45:55	36.504	110	125886	932.144	26065.6	459.121	1.867e+06	15922.7	0.0702727	0.00047308	0.207476	0.00289762		15.6716	0.364716	0.207082	0.00144912	-0.44049
RA-138_015		2023-06-27 02:05:27	36.504	110	27436.9	241.089	5567.76	106.901	539074	4827.31	0.0574275	0.000466158	0.204177	0.00372491		15.9133	0.311174	0.203037	0.00186205	-0.0955907
RA138_016		2023-04-13 22:15:22	36.506	110	66831.3	862.529	12603.7	417.575	1.19569e+06	15546.5	0.061629	0.000683342	0.188207	0.00438531		16.6597	0.297217	0.188622	0.00219302	-0.644495
RA138_016		2023-04-14 20:15:10	36.504	110	94310.1	636.337	13559.8	195.198	1.6529e+06	12604.7	0.0590504	0.00038358	0.143823	0.00191573		17.1912	0.437535	0.143884	0.000957988	0.320351
RA138_016		2023-05-11 19:32:53	36.504	110	90482.7	564.455	16828.9	259.382	1.59659e+06	12686.2	0.0585903	0.000440213	0.186074	0.00274323		16.2947	0.308601	0.186021	0.00137216	0.4999
RA138_016		2023-07-28 14:58:32	37.005	110	98154.6	583.585	16807.9	231.282	1.45618e+06	12612.9	0.0695596	0.000405665	0.171268	0.00195532		16.2088	0.300854	0.171272	0.000977594	-0.447564
RA138_016		2023-05-22 20:47:36	37.506	110	114645	754.818	27453.7	434.981	1.80165e+06	12731.7	0.0644848	0.000394652	0.240392	0.00279003		15.1218	0.302546	0.239409	0.00139549	0.798154
RA138_016		2023-06-14 19:37:35	36.504	110	111940	755.294	20464.6	356.373	1.7209e+06	13776.6	0.0677821	0.000384911	0.183389	0.00270598		16.3379	0.379073	0.18284	0.00135308	-0.41565
RA-138_016		2023-06-27 02:59:07	36.503	110	26954.8	262.063	5410.72	139.522	536778	4739.79	0.0565299	0.000446	0.199639	0.00437363		16.1696	0.315808	0.200839	0.00218783	-0.0330523
RA138_017		2023-04-13 23:06:47	36.504	110	77461.8	1516.69	16250.4	762.186	1.17905e+06	10662.3	0.0724798	0.00127206	0.207878	0.00665514		14.189	0.270915	0.209822	0.00332694	-0.263143		x
RA138_017		2023-04-14 21:03:08	36.507	110	82327.7	448.242	13992.8	240.494	1.40767e+06	9287.82	0.0607113	0.000359237	0.169301	0.00275332		16.6829	0.424008	0.170088	0.00137697	-0.053385
RA138_017		2023-05-11 20:24:24	36.504	110	75678.8	460.039	10326.6	148.911	1.46824e+06	11476.5	0.0532453	0.000275758	0.136282	0.00172442		17.9081	0.335634	0.136476	0.000862263	0.32437
RA138_017		2023-07-28 15:00:05	37.004	110	95358.9	462.442	20866.9	247.847	1.35007e+06	6008.69	0.0727677	0.000425293	0.220031	0.00240274		15.4947	0.287615	0.218867	0.00120129	-0.2981
RA138_017		2023-05-22 21:12:46	37.508	110	113978	513.772	18009.5	149.317	2.03755e+06	14156.7	0.0566111	0.000275784	0.157939	0.00127378		17.2391	0.343426	0.157971	0.000636967	0.510828
RA138_017		2023-06-14 19:39:02	36.508	110	127399	1128.47	29274.7	669.674	1.80519e+06	12671.1	0.0733992	0.00045838	0.229247	0.00367939		15.0891	0.350647	0.229816	0.0018398	-0.471401
RA-138_017		2023-06-27 03:54:39	36.518	110	24857.6	239.811	2656.8	74.7082	559663	6166.84	0.0499497	0.00039377	0.106453	0.0027194		18.3039	0.357482	0.106937	0.00136043	-0.00625121
RA138_018		2023-04-13 23:08:18	36.524	110	77122.3	623.865	14182.6	270.953	1.37882e+06	11568.7	0.0617124	0.000487202	0.185413	0.00316903		16.6655	0.290156	0.183929	0.0015842	-0.366394
RA138_018		2023-04-14 21:04:39	36.52	110	85242	496.538	11594.2	158.12	1.54034e+06	12054.2	0.057416	0.000351272	0.136002	0.00184608		17.6391	0.448521	0.136114	0.000923235	0.144534
RA138_018		2023-05-11 20:25:55	36.503	110	79063.7	624.843	12239.9	163.905	1.49184e+06	13603.3	0.0548218	0.000323617	0.154628	0.00170122		17.3926	0.326903	0.154836	0.000850647	0.45838
RA138_018		2023-07-28 15:01:37	37.004	110	93953.4	666.436	13650.4	259.813	1.47602e+06	10988.3	0.0653988	0.000392509	0.145244	0.00214212		17.2412	0.320249	0.145317	0.00107098	-0.654672
RA138_018		2023-05-22 21:36:14	37.504	110	102815	675.449	22359.5	286.283	1.68236e+06	10644.1	0.0619018	0.000367998	0.217932	0.00215835		15.7692	0.31529	0.217422	0.00107887	0.707774
RA138_018		2023-06-14 20:30:52	36.506	110	163350	1699.77	82184.5	1441.52	1.3164e+06	19035.2	0.129111	0.00228815	0.504059	0.00500109		8.58844	0.211909	0.503179	0.00249988	-0.769443
RA-138_018		2023-06-27 04:44:51	36.504	110	21514.3	173.045	1953.79	42.3105	498700	4789.36	0.048645	0.000362182	0.0910106	0.0020161		18.7987	0.366336	0.0908615	0.00100788	0.260558
RA138_019		2023-04-14 00:01:45	36.506	110	73228.1	499.983	11119.5	132.1	1.38098e+06	11747.8	0.0586571	0.000358079	0.151488	0.00165904		17.5636	0.302617	0.151873	0.000829419	0.215055
RA138_019		2023-04-14 21:54:40	36.516	110	81248.3	505.376	10992.6	143.635	1.48982e+06	11417.7	0.0564458	0.000303447	0.135043	0.00163471		17.8996	0.454395	0.135395	0.000817324	0.255425
RA138_019		2023-05-11 21:15:33	36.504	110	81495.6	1348.32	16570.1	1127.18	1.42517e+06	12659.8	0.0590795	0.00102091	0.201179	0.00974617		16.1302	0.330262	0.203359	0.00487123	0.965958
RA138_019		2023-07-28 15:51:12	37.006	110	96559.4	425.515	16941.4	160.893	1.45399e+06	11946.6	0.0684849	0.000394193	0.17625	0.00179368		16.4798	0.305786	0.175484	0.000896682	-0.23464
RA138_019		2023-05-22 22:01:35	37.504	110	109657	529.298	16389.8	163.879	1.99731e+06	13025.8	0.0555771	0.000227992	0.149337	0.00133142		17.5585	0.349027	0.149429	0.000665388	0.298485
RA138_019		2023-06-14 20:32:19	17.4693	110	136643	2205.36	30303.7	1088.27	1.97963e+06	21306.5	0.0727612	0.000753201	0.219422	0.00551888		15.2392	0.359679	0.2218	0.00275871	-0.253408
RA-138_019		2023-06-27 05:38:16	36.52	110	23545.5	206.783	3308.5	61.9373	518044	5309.15	0.0512225	0.000404846	0.140698	0.00254084		17.8566	0.348784	0.140589	0.00126958	0.219756
RA138_020		2023-04-14 00:03:16	36.506	110	69776.1	558.809	11974	202.072	1.27605e+06	12763.2	0.0605387	0.000445264	0.170802	0.00224878		17.0186	0.295296	0.171635	0.00112425	0.11433
RA138_020		2023-04-14 21:56:11	36.514	110	75258.4	541.447	10335.3	207.358	1.39138e+06	11268.7	0.055993	0.000353252	0.137047	0.00225726		18.0431	0.459003	0.13743	0.00112859	0.390916
RA138_020		2023-05-11 21:17:04	36.51	110	75288.5	665.097	13041.2	309.558	1.36527e+06	11910.8	0.0569453	0.000474917	0.172339	0.00335298		16.7347	0.318377	0.173245	0.00167585	0.57041
RA138_020		2023-07-28 15:52:46	37.006	110	95002.8	520.832	14345.9	181.455	1.47885e+06	9569.81	0.0664484	0.000297346	0.15149	0.00144249		16.9854	0.313664	0.151034	0.00072112	-0.0175214
RA138_020		2023-05-22 22:25:30	37.505	110	109736	553.365	21945.9	262.574	1.86018e+06	11505.7	0.0597142	0.000364581	0.199963	0.00195429		16.3301	0.326703	0.199939	0.00097686	0.474813
RA138_020		2023-06-14 21:24:00	36.504	110	132168	938.822	35463.8	579.631	1.83426e+06	8447.92	0.0748147	0.000517929	0.269479	0.00346536		14.7637	0.343792	0.268356	0.00173274	-0.277787
RA-138_020		2023-06-27 06:33:34	36.505	110	25265.8	510.479	9462.44	279.893	369346	8596.04	0.0778641	0.00104645	0.378135	0.00733585		11.7496	0.238216	0.374713	0.00366819	-0.274895
RA138_021		2023-04-14 00:56:36	36.505	110	76332.7	836.165	13384.4	408.3	1.36604e+06	12679	0.0616444	0.000630445	0.174718	0.00392264		16.7419	0.296522	0.175373	0.00196145	-0.235874
RA138_021		2023-04-14 22:44:22	36.504	110	79568.6	490.932	12988.4	226.693	1.38838e+06	10977.4	0.0592587	0.000431798	0.163034	0.00253024		17.0096	0.433822	0.163353	0.00126499	0.524959
RA138_021		2023-05-11 22:08:36	36.504	110	84797.9	422.706	14329.7	143.141	1.55514e+06	11938.4	0.0564534	0.000302027	0.16895	0.00164343		16.8853	0.316669	0.169014	0.000821459	0.402254
RA138_021		2023-07-28 15:54:18	37.004	110	97992.2	842.152	15215.1	296.634	1.51967e+06	14273.6	0.0662339	0.00039093	0.155691	0.00231295		17.0409	0.316393	0.155299	0.00115626	-0.451694
RA138_021		2023-05-22 22:50:59	37.504	110	102007	564.161	15033.7	176.523	1.85897e+06	13739.5	0.0556926	0.00028391	0.147945	0.00138486		17.4892	0.348657	0.147343	0.000692399	0.614342
RA138_021		2023-06-14 21:25:27	36.506	110	144383	936.854	38806	550.539	1.98158e+06	14855	0.0759169	0.000456905	0.269816	0.00305244		14.5466	0.337823	0.268804	0.00152636	-0.237846
RA-138_021		2023-06-27 07:28:34	36.504	110	22907	213.182	2798.33	92.1279	520550	3998.37	0.0495716	0.000432127	0.121153	0.00348531		18.4597	0.362156	0.122225	0.00174298	-0.0719449
RA138_022		2023-04-14 00:58:07	36.504	110	77081.4	795.872	15585	340.834	1.33498e+06	14811.9	0.0637856	0.000715677	0.2022	0.00380285		16.1807	0.289004	0.202224	0.00190157	0.0405284
RA138_022		2023-04-14 22:45:53	36.504	110	87722.5	542.162	12635.1	167.766	1.56289e+06	13957.3	0.0582858	0.000369739	0.144065	0.00192392		17.2923	0.439941	0.144139	0.00096186	0.413206
RA138_022		2023-05-11 22:10:07	36.504	110	95827	1346.47	20810.4	659.375	1.61651e+06	20807.3	0.0608034	0.000589566	0.21648	0.00424546		15.6776	0.300776	0.217203	0.00212208	0.734401
RA138_022		2023-07-28 16:38:58	37.004	110	94293.3	537.749	15808	182.71	1.42221e+06	10273.9	0.0682096	0.000328824	0.169046	0.0016807		16.5645	0.306253	0.167679	0.000840674	0.054202
RA138_022		2023-05-22 23:14:53	37.504	110	102574	851.672	19315.9	445.987	1.743e+06	16166.7	0.0592245	0.000439055	0.187696	0.00365366		16.4248	0.330406	0.188266	0.00182704	0.868225
RA138_022		2023-06-14 22:15:29	36.512	110	131681	1804.29	31716.2	903.507	1.79787e+06	19781.8	0.0758771	0.000646696	0.240709	0.00426645		14.4229	0.337765	0.240884	0.00213341	-0.642949
RA-138_022		2023-06-27 08:21:33	36.503	110	35713.2	3047.93	14904.5	2879.6	506323	6279.94	0.0812514	0.00704992	0.330102	0.0208057		11.2647	0.534097	0.417557	0.0104049	-0.967397
RA138_023		2023-04-14 01:51:26	36.506	110	67012.1	379.377	11015.7	148.744	1.23077e+06	6887.36	0.0599627	0.000520735	0.164618	0.00241979		17.2416	0.301802	0.164412	0.00120343	-0.0202599
RA138_023		2023-04-14 23:35:51	36.503	110	90065.8	1321.03	16334.4	963.468	1.56487e+06	14328.5	0.0597987	0.000907606	0.177753	0.00665186		16.8146	0.443216	0.181493	0.00332533	0.9727
RA138_023		2023-05-11 23:01:54	36.504	110	85407.9	537.245	13848.2	201.551	1.57604e+06	14094.8	0.0559653	0.000375652	0.162586	0.00217623		17.0504	0.321626	0.162169	0.00108826	0.549479
RA138_023		2023-07-28 16:40:29	37.003	110	93231.2	553.683	16277.2	168.04	1.3994e+06	10703	0.0686738	0.000323476	0.174541	0.00147409		16.4533	0.304079	0.174623	0.000737338	0.126368
RA138_023		2023-05-22 23:40:22	37.505	110	106663	736.625	21232.8	275.447	1.78818e+06	12936.4	0.0604622	0.000321713	0.200427	0.00194537		16.0647	0.320491	0.199016	0.000972843	0.439924
RA138_023		2023-06-14 22:16:56	36.504	110	137459	701.04	31611.3	396.984	1.92536e+06	15691.1	0.0743981	0.000559805	0.229645	0.00265966		14.7046	0.343103	0.229996	0.00132986	-0.131458
RA-138_023		2023-06-27 09:13:40	36.51	110	25403.8	236.397	3297.44	194.716	571908	4889.03	0.0500166	0.000500026	0.126592	0.00587802		18.3033	0.361871	0.129869	0.00293909	-0.164048
RA138_024		2023-04-14 01:52:57	36.505	110	78495.1	532.375	13948.1	232.873	1.40854e+06	10582.7	0.0616246	0.000561735	0.178909	0.00277317		16.7774	0.294595	0.177724	0.00138675	-0.475594
RA138_024		2023-04-14 23:37:22	36.507	110	78030.4	742.453	10674.3	175.629	1.45596e+06	17284	0.0556237	0.000405925	0.136874	0.00185906		18.0754	0.461018	0.136896	0.000929368	0.376908
RA138_024		2023-05-11 23:03:25	36.503	110	81405.3	553.375	13913.2	240.447	1.48974e+06	14523.8	0.0566322	0.000425405	0.170185	0.00246755		16.8502	0.319117	0.170941	0.00123394	0.617865
RA138_024		2023-07-28 16:42:03	37.004	110	96001.9	633.213	16192.8	220.703	1.45492e+06	12422.3	0.0685971	0.000310937	0.168348	0.00165839		16.4724	0.30425	0.168704	0.00082953	-0.178888
RA138_024		2023-05-23 00:04:09	20.8624	110	121190	684.088	29690.7	349.883	1.94238e+06	10309.4	0.0639261	0.000423108	0.24578	0.00259337		15.1745	0.304202	0.244934	0.00129697	0.521876
RA138_024		2023-06-14 23:08:30	36.512	110	135897	697.582	43675.1	519.664	1.65703e+06	10416.3	0.0851629	0.000566841	0.32047	0.00290287		12.6529	0.294394	0.321422	0.00145164	-0.176163
RA-138_024		2023-06-27 09:20:22	36.507	110	22546.7	216.818	3068.19	107.295	491998	5256	0.0515989	0.000428167	0.13579	0.00410115		17.7425	0.347279	0.136153	0.00205055	-0.376422
RA138_025		2023-04-14 02:44:21	36.504	110	67597.2	562.115	10515.7	244.377	1.25569e+06	9805.05	0.0594434	0.000492585	0.156522	0.00298015		17.4216	0.304112	0.155591	0.0014901	-0.266938
RA138_025		2023-04-15 00:27:40	36.504	110	83297.6	487.504	11608	158.299	1.55019e+06	9195.43	0.0555738	0.000345531	0.139296	0.00194791		18.048	0.459028	0.139457	0.0009742	0.238758
RA138_025		2023-05-11 23:53:16	36.506	110	79169.6	453.967	14573.2	173.578	1.42299e+06	9192.67	0.0574657	0.000313355	0.184583	0.00210472		16.6249	0.311909	0.184107	0.00105288	0.332796
RA138_025		2023-07-28 17:31:45	37.004	110	99710.8	760.45	17536.9	296.333	1.50821e+06	15166.2	0.0675013	0.000419782	0.176053	0.00224927		16.7716	0.311826	0.175911	0.00112452	-0.463608
RA138_025		2023-05-23 00:29:30	37.504	110	109454	601.41	18406.5	235.6	1.9406e+06	12600.1	0.0573137	0.000246935	0.168568	0.00177471		16.9069	0.336261	0.168126	0.00088755	0.381297
RA138_025		2023-06-14 23:09:56	36.505	110	129093	1916.78	28851.9	1556.29	1.87956e+06	13935.3	0.0710815	0.00103357	0.214984	0.00487976		15.1518	0.365888	0.223524	0.00244024	-0.927548
RA-138_025		2023-06-27 09:21:53	36.506	110	23891	212.861	3722.71	164.583	510541	5787.77	0.0529131	0.000640755	0.155306	0.00601879		17.302	0.347145	0.155903	0.00300931	-0.637796
RA138_026		2023-04-14 02:45:52	36.505	110	63691.5	587.449	12233.6	259.603	1.11886e+06	11040.6	0.0629891	0.000583072	0.193455	0.00336464		16.4417	0.289004	0.19211	0.00168235	-0.258821
RA138_026		2023-04-15 00:29:10	36.506	110	90369.2	591.726	16624	362.743	1.58522e+06	10278	0.0590148	0.00045577	0.183963	0.00340435		16.9944	0.433981	0.18409	0.00170261	0.606779
RA138_026		2023-05-11 23:54:47	36.504	110	81897	613.342	14437.7	233.747	1.48704e+06	14796.8	0.0570586	0.000304731	0.176314	0.00244197		16.744	0.314008	0.17632	0.00122159	0.459872
RA138_026		2023-07-28 17:33:18	37.004	110	101379	947.453	24172.9	696.77	1.39158e+06	4976.64	0.0748698	0.000664913	0.238031	0.00516358		15.1221	0.285216	0.238487	0.00258157	-0.781015
RA138_026		2023-05-23 00:53:24	37.504	110	107840	552.83	16691.9	230.429	1.92819e+06	15362.5	0.0568375	0.000324626	0.154763	0.00200474		17.04	0.340409	0.154746	0.00100248	0.25582
RA138_026		2023-06-15 00:01:39	36.504	110	130581	641.19	34173	366.561	1.8539e+06	13387.5	0.0732639	0.000399476	0.260239	0.00216158		14.3916	0.333719	0.26173	0.00108057	-0.244006
RA-138_026		2023-06-27 09:23:24	36.505	110	21342	193.379	1776.19	49.6419	509510	4878.71	0.0472722	0.000374176	0.082816	0.0020427		19.3667	0.378302	0.0832685	0.00102132	-0.0783456
RA138_027		2023-04-14 03:39:14	36.517	110	72913.7	486.399	12393.1	158.328	1.32921e+06	12011.4	0.0606045	0.000411961	0.170541	0.00217967		17.1177	0.296041	0.169998	0.00108979	0.0718291
[truncated: 823 more rows]

## Sheet: S3 Summary Figure 2c-d
Summary RA138											Summary RA138 Ssys calc							Ssys	0.01	0.0125	0.015	0.0175	0.02
[truncated: 31 more rows]

[truncated: 2 more sheets: S4 ID-TIMS, S5 TE table]
