# Supplementary material for: Technical note: RA138 calcite U–Pb LA-ICP-MS primary reference material
Source: Copernicus journal article supplement (doi:10.5194/gchron-6-465-2024), 2024-08-08
Supplement: Supplementary file [file gchron-6-465-2024-supplement-title-page.pdf › gchron-6-465-2024-supplement-title-page.pdf]

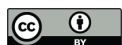

*Supplement of*

## **Technical note: RA138 calcite U–Pb LA-ICP-MS primary reference material**

**Marcel Guillong et al.**

*Correspondence to:* Marcel Guillong (marcel.guillong@eaps.ethz.ch)

- gchron-6-465-2024-supplement-title-page.pdf
- Supplementary figures.pdf
- Supplementary Tables.xlsx

The copyright of individual parts of the supplement might differ from the article licence.
